# Supplementary material for: Selective C2 and C3 phosphorylmethylation of indoles with a phosphorylmethyl dibenzothiophenium reagent
Source: Royal Society of Chemistry journal article supplement (doi:10.1039/d4qo00611a), 2024-01-01
Supplement: d4qo00611a1.pdf [file d4qo00611a1.pdf]

## Supporting Information

### Selective C2 and C3 Phosphorylmethylation of Indoles with a Phosphorylmethyl Dibenzothiophenium Reagent

Xiaomin Shi,<sup>a,b</sup> Hongmei Qu,<sup>\*a</sup> Yaxing Wu,<sup>b</sup> Fei Wang<sup>b</sup> and Chao Chen<sup>\*b</sup>

a. Key Laboratory of Systems Bioengineering, Ministry of Education, Department of Pharmaceutical Engineering, School of Chemical Engineering and Technology, Tianjin University, Tianjin 300350, China.

b. Key Laboratory of Bioorganic Phosphorus Chemistry & Chemical Biology (Ministry of Education, MOE), Department of Chemistry, Tsinghua University, Beijing 100084, China.

E-mail: ququhongmei@126.com; chenchao01@mails.tsinghua.edu.cn

### Table of Contents

|                                                                                                          |     |
|----------------------------------------------------------------------------------------------------------|-----|
| 1. General Information.....                                                                              | 2   |
| 2. Preparation of the Reagent I. ....                                                                    | 2   |
| 3. The optimization of the metal catalyzed phosphorylmethylation of Indoles C3 reaction conditions ..... | 4   |
| 4. Preparation of <i>N</i> -substituted Indoles Substrates. ....                                         | 4   |
| 5. General Procedure for the Preparation of 3. ....                                                      | 9   |
| 6. General Procedure for the Preparation of 4. ....                                                      | 13  |
| 7. Functional Group Transformation.....                                                                  | 19  |
| 8. Mechanistic Investigations.....                                                                       | 21  |
| 9. X-Ray Crystal Structures. ....                                                                        | 24  |
| 10. NMR Spectra. ....                                                                                    | 41  |
| 11. References. ....                                                                                     | 109 |

## 1. General Information

Unless otherwise noted, all reactions were carried out in a pre-dried, sealed Schlenk reaction tube under nitrogen atmosphere. All reactions were monitored by TLC with silica gel-coated plates.  $^1\text{H}$ ,  $^{13}\text{C}$ ,  $^{19}\text{F}$ , and  $^{31}\text{P}$  NMR spectra were recorded with a JEOL AL-600, AL-400 spectrometer. Coupling constants (J) are quoted in Hz. The following abbreviations were used to show the multiplicities: s: singlet, d: doublet, t: triplet, q: quadruplet, dd: doublet of doublet, m: multiplet. The residual solvent signals were used as references (DMSO- $d_6$ :  $\delta_{\text{H}} = 2.50$  ppm,  $\delta_{\text{C}} = 39.5$  ppm.  $\text{CDCl}_3$ :  $\delta_{\text{H}} = 7.26$  ppm,  $\delta_{\text{C}} = 77.16$  ppm). HRMS data were recorded on a high-resolution mass spectrometer in EI or ESI mode. UV-vis absorption spectra were recorded on an UV 2700. Melting points were reported for new compounds.

**Starting Materials:** Unless stated otherwise, all commercially available compounds were used as supplied without further purification or prepared according to published procedures. Solvents were purified by means of a solvent purification system.

**Photochemistry:** All photoredox-catalyzed reactions with blue light were carried out using a photoreactor equipped with a blue LED module (25 W Power LED blau 450 nm, purchased from GreeThink), consisting out of 50 LED-chips. The power of the LED was adjusted using a linear regulator.

## 2. Preparation of the Reagent I.

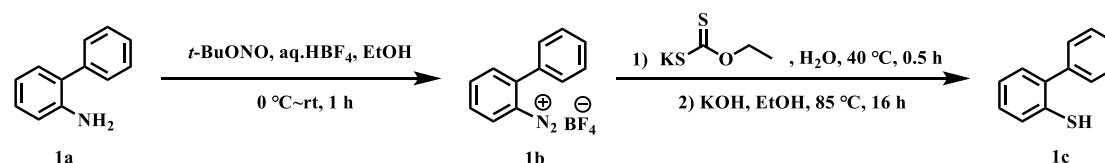

To a solution of 2-Aminodiphenyl 1a (40 mmol, 6.77 g, 1.0 equiv.) in absolute EtOH (20 mL, 3.3 M) was added  $\text{HBF}_4$  (12.8 mL, 48% in water) at room temperature. After being stirred for 5 minutes, the mixture was cooled to  $0\text{ }^\circ\text{C}$  and tert-butyl nitrite (10.8 mL, 2.0 equiv.) was added dropwise. After being stirred at  $0\text{ }^\circ\text{C}$  for 1 h,  $\text{Et}_2\text{O}$  (80 mL) was added to the reaction mixture. The resulting solid was filtered, washed with  $\text{Et}_2\text{O}$  (3 x 20 mL), and to give the corresponding product 1b in 97% yields. Dissolved diazonium salts 1b in water and cooled to  $0\text{ }^\circ\text{C}$ . The cold diazonium solution was added slowly to a solution of potassium ethyl xanthate (7.74 g, 48 mmol, 1.25 equiv.) in water (100 mL) at  $45\text{ }^\circ\text{C}$ . The reaction mixture was stirred for an additional 30 minutes at  $45\text{ }^\circ\text{C}$  and then cooled to room temperature. The reaction mixture was extracted with diethyl ether (3 x 50 mL). The combined organic extracts were washed with 10 %  $\text{NaOH}$  solution (100 mL), water (3 x 50 mL), brine (100 mL), dried over  $\text{Na}_2\text{SO}_4$ , filtered and evaporated under reduced pressure.

The resulting crude aryl xanthate product was dissolved in ethanol (100 mL) and heated to reflux. Potassium hydroxide pellets (8.67 g, 154.5 mmol, 4 equiv.) were added and refluxing continued overnight. The solution was cooled to room temperature and the ethanol was evaporated under reduced pressure. The residue was dissolved in water and washed with ethyl acetate (100 mL). The aqueous layer was acidified with 2 N  $\text{HCl}$  and extracted with ethyl acetate (3 x 50 mL). The organic extracts were washed with water (100 mL), brine (100 mL), dried over  $\text{Na}_2\text{SO}_4$ , filtered and evaporated under reduced pressure to afford 5.3 g (71 %) of crude product (overall, 3 steps). The crude thiol was used directly in the next step without further purification<sup>1</sup>.

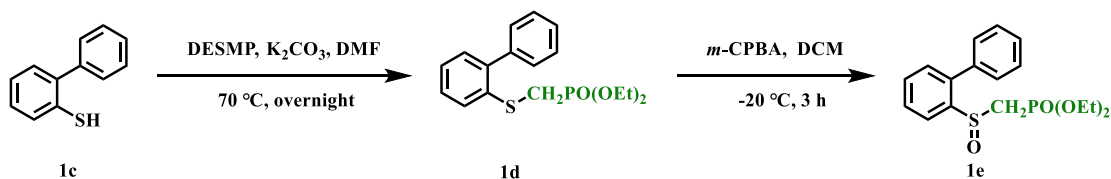

The crude thiol **1c** (5.3 g, 28 mmol) and  $K_2CO_3$  (7.84 g, 56 mmol, 2 equiv.) were dissolved in DMF (80 mL), the mixture of which was stirred at 70 °C overnight. After concentration of the reaction, the residue was washed with a large amount of  $H_2O$  (300 mL) and extracted with ethyl acetate. The resulting organic phase was then dried over  $Na_2SO_4$  and the solvent was removed under reduced pressure. The crude was purified via flash column chromatography on silica gel (petroleum ether: ethyl acetate = 2:1) to get 9.408 g of **1d** as a colorless oil (98 %). **diethyl (([1,1'-biphenyl]-2-ylthio)methyl)phosphonate (1d)**  $^1H$  NMR (400 MHz, Chloroform-*d*)  $\delta$  7.54 (d,  $J = 7.7$  Hz, 1H), 7.43 – 7.17 (m, 8H), 4.10 – 3.89 (m, 4H), 2.91 (d,  $J = 14.1$  Hz, 2H), 1.19 (t,  $J = 7.0$  Hz, 6H).  $^{13}C$  NMR (101 MHz, Chloroform-*d*)  $\delta$  143.07, 140.44, 134.00 (d,  $J = 5.7$  Hz), 130.56, 130.11, 129.48, 128.17, 128.12, 126.93, 62.71 (d,  $J = 6.4$  Hz), 28.99, 27.52, 16.42, 16.35.  $^{31}P$  NMR (162 MHz, Chloroform-*d*)  $\delta$  23.71. HRMS (EI)  $m/z$ : calcd for  $C_{17}H_{21}O_3PS$ : 337.1882, found  $[M]^+$ : 337.1880.

To a solution of above oil **1d** in DCM (80 mL) was added *m*-CPBA (85 % purity) (5.97 g, 29.4 mmol, 1.05 equiv.) in portions at -20 °C. The resulting suspension was stirred for 3 h at -20 °C, allowing full conversion of **1d** into the product **1e**. DCM (200 mL) was added and the solution was washed with 10% (w/w) aqueous solution of  $Na_2S_2O_3$  (2 x 100 mL), 5% (w/w) aqueous solution of  $NaHCO_3$  (2 x 100 mL), brine (2 x 100 mL) and dried over  $Na_2SO_4$ . The solvent was removed under reduced pressure and the crude was purified via flash column chromatography on silica gel (petroleum ether: ethyl acetate = 2 : 1) to get 9.73 g of **1e** as a colorless oil (98 %). **diethyl (([1,1'-biphenyl]-2-ylsulfinyl)methyl)phosphonate (1e)**  $^1H$  NMR (400 MHz, Chloroform-*d*)  $\delta$  8.01 (d,  $J = 6.6$  Hz, 1H), 7.51 – 7.40 (m, 2H), 7.28 – 7.23 (m, 6H), 4.09 – 3.49 (m, 4H), 2.80 (p,  $J = 14.4, 14.0$  Hz, 2H), 1.16 – 1.05 (m, 6H).  $^{13}C$  NMR (101 MHz, Chloroform-*d*)  $\delta$  142.76 (d,  $J = 10.8$  Hz), 139.63, 137.47, 131.24, 130.60, 129.10 (d,  $J = 23.9$  Hz), 128.63 (d,  $J = 28.8$  Hz), 123.96, 62.66 (dd,  $J = 17.7, 6.1$  Hz), 52.08, 50.70, 16.30, 16.22.  $^{31}P$  NMR (162 MHz, Chloroform-*d*)  $\delta$  17.50. HRMS (EI)  $m/z$ : calcd for  $C_{17}H_{21}O_4PS$ : 353.1171, found  $[M]^+$ : 353.1176.

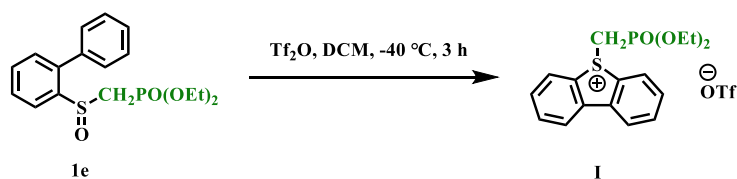

To a solution of the above sulfoxide **1e** in DCM (80 mL) was added  $Tf_2O$  (4.8 mL, 28 mmol, 1.0 equiv.) dropwise at -40 °C. The mixture was stirred at the same temperature for 2~3 h, and then the solvent was removed under reduced pressure. The resulting brown oil was dissolved in a minimum of DCM (10 mL). Then,  $Et_2O$  (200 mL) was added and the crude product was stirred vigorous under ether for about 1 h. Then the solid was collected by filtration and dried under vacuum as a white powder (13 g, 98 %). **S-((diethoxyphosphoryl)methyl) dibenzothiophene salt (I)** Melting Point: 123-125 °C.  $^1H$  NMR (400 MHz, Chloroform-*d*)  $\delta$  8.59 (d,  $J = 8.2$  Hz, 2H), 8.10 (d,  $J = 7.8$  Hz, 2H), 7.84 (t,  $J = 7.7$  Hz, 2H), 7.69 (t,  $J = 7.8$  Hz, 2H), 4.42 (d,  $J = 12.9$  Hz, 2H), 4.14 – 4.02 (m, 4H), 1.20 (t,  $J = 7.1$  Hz, 6H).  $^{13}C$  NMR (101 MHz, Chloroform-*d*)  $\delta$  139.66, 134.53, 131.22, 130.09,

128.28 (d,  $J = 3.6$  Hz), 123.78, 64.48 (d,  $J = 6.3$  Hz), 43.34, 41.95, 16.21, 16.15.  $^{19}\text{F}$  NMR (376 MHz, Chloroform- $d$ )  $\delta$  -78.13.  $^{31}\text{P}$  NMR (162 MHz, Chloroform- $d$ )  $\delta$  11.63. HRMS (EI)  $m/z$ : calcd for  $\text{C}_{18}\text{H}_{20}\text{F}_3\text{O}_6\text{PS}_2$ : 484.4410, found  $[\text{M}]^+$ : 484.4400.

### 3. The optimization of the metal catalyzed phosphorylmethylation of Indoles C3 reaction conditions

Additives screening

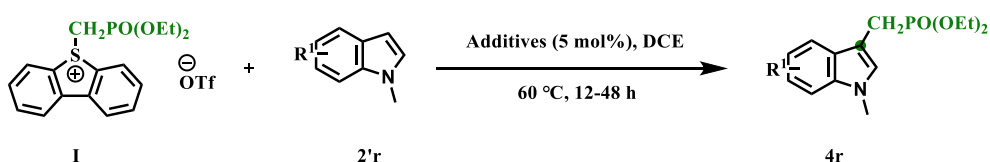

A mixture of indole 2 (0.2 mmol, 1.0 equiv.), reagent I (106.5 mg, 0.22 mmol, 1.1 equiv.) and Additives (5 mol %) in DCE (2.0 mL) was stirred at 60 °C overnight. The course of the reaction was monitored with thin layer chromatography (TLC). The reaction mixture was then cooled to the room temperature and 10  $\mu\text{L}$  of *n*-dodecane was added as an internal standard and the reaction mixture was diluted with EtOAc. The crude reaction mixture was filtered through a plug of silica then subjected to GC-MS analysis.

Table S1. Additives screening

| Entry | Additives                               | Yield/% |
|-------|-----------------------------------------|---------|
| 1     | $\text{Cu}(\text{OTf})_2$               | 58      |
| 2     | $\text{CuBr}$                           | 10      |
| 3     | $\text{CuOTf}$                          | 42      |
| 4     | $\text{ZnCl}_2$                         | 0       |
| 5     | /                                       | 0       |
| 6     | $\text{LiBr}$                           | 0       |
| 7     | $\text{Ni}(\text{OTf})_2$               | 27      |
| 8     | $\text{La}(\text{OTf})_3$               | trace   |
| 9     | $\text{In}(\text{OTf})_3$               | 10      |
| 10    | $\text{BF}_3 \cdot \text{Et}_2\text{O}$ | 0       |
| 11    | $\text{MgCl}_2$                         | 0       |

### 4. Preparation of N-substituted Indoles Substrates.

4.1 General procedure for synthesis of protected indoles 2 and 2' (GP-1<sup>2</sup>).

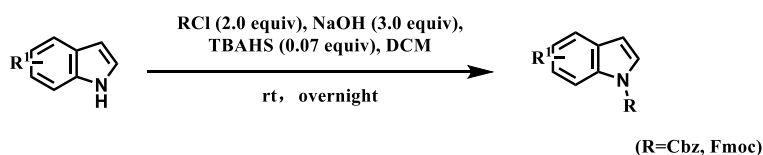

Indole (5.0 mmol, 1.0 equiv.), NaOH (600 mg, 15 mmol), tetrabutylammonium bisulfate (TBAHS) (85 mg, 0.35 mmol) were suspended in DCM (25 mL) and stirred at room temperature for 1 hour, after which the mixture was cooled to 0 °C and R-Cl (R= Cbz, Fmoc) (10 mmol) was added dropwise. The mixture was stirred for 16 hours at room temperature, then partitioned between DCM and saturated aqueous NH<sub>4</sub>Cl. The aqueous layer was extracted with DCM (2 x 30 mL), and the combined organic layers were washed with brine, dried over Na<sub>2</sub>SO<sub>4</sub>. The solvent was removed under reduced pressure and the resulting residue was purified by silica chromatography using the indicated eluent.

#### 4.2 General procedure for synthesis of protected indoles 2 and 2' (GP-2<sup>3</sup>).

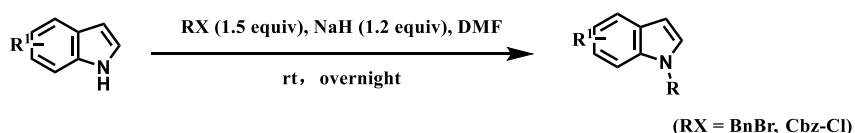

To a stirred suspension of NaH (60 % dispersion in mineral oil; 240 mg, 6.0 mmol, 1.2 equiv.) in DMF (5 mL) was added dropwise a solution of an indole (5.0 mmol, 1.0 equiv.) in DMF (5 mL) at 0 °C, and the mixture was stirred at room temperature for 1 h. To the mixture was added dropwise BnBr or Cbz-Cl (7.5 mmol, 1.5 equiv.) at 0 °C, and the resulting mixture was stirred at room temperature overnight. The reaction was quenched with water and the aqueous layer was extracted with ethyl acetate (2 x 30 mL). The combined organic layer was dried over Na<sub>2</sub>SO<sub>4</sub> and evaporated to leave a residue, which was purified by column chromatography using the indicated eluent.

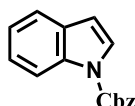

**benzyl 1H-indole-1-carboxylate (2a)** was prepared using 1H-indole and benzyl carbonochloridate according to the GP-2 as a colourless solid (0.89 g, 71 %). Spectroscopic data are in accordance with the reported in the literature<sup>4</sup>.

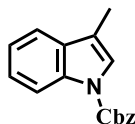

**benzyl 3-methyl-1H-indole-1-carboxylate (2b)** was prepared using 3-methyl-1H-indole and benzyl carbonochloridate according to the GP-2 as a yellow solid (0.90 g, 68 %). Spectroscopic data are in accordance with the reported in the literature<sup>5</sup>.

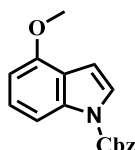

**benzyl 4-methoxy-1H-indole-1-carboxylate (2c)** was prepared using 3-methyl-1H-indole and benzyl carbonochloridate according to the GP-2 as a white solid (1.25 g, 89 %). Melting Point: 92-

93 °C. <sup>1</sup>H NMR (400 MHz, Chloroform-*d*) δ 8.05 (s, 1H), 7.59 (d, *J* = 3.7 Hz, 1H), 7.47 (d, *J* = 6.6 Hz, 2H), 7.44 – 7.33 (m, 3H), 7.02 (d, *J* = 2.6 Hz, 1H), 6.92 (dd, *J* = 9.1, 2.5 Hz, 1H), 6.51 (d, *J* = 3.8 Hz, 1H), 5.43 (s, 2H), 3.84 (s, 3H). <sup>13</sup>C NMR (101 MHz, Chloroform-*d*) δ 156.21, 135.25, 131.45, 128.86, 128.80, 128.53, 126.25, 115.96, 113.29, 108.16, 103.74, 68.71, 55.76. HRMS (EI) *m/z*: calcd for C<sub>17</sub>H<sub>15</sub>NO<sub>3</sub>: 282.0443, found [M]<sup>+</sup>: 282.0440.

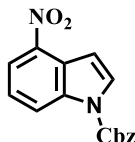

**benzyl 4-nitro-1*H*-indole-1-carboxylate (2d)** was prepared using 4-nitro-1*H*-indole and benzyl carbonochloridate according to the GP-2 as a yellow solid (1.21 g, 82 %). Melting Point: 112-114 °C. <sup>1</sup>H NMR (400 MHz, Chloroform-*d*) δ 8.52 (d, *J* = 8.3 Hz, 1H), 8.15 (d, *J* = 8.2 Hz, 1H), 7.80 (d, *J* = 3.7 Hz, 1H), 7.51 (d, *J* = 6.4 Hz, 2H), 7.43 (q, *J* = 7.4, 6.8 Hz, 3H), 7.36 (t, *J* = 8.2 Hz, 1H), 7.32 (d, *J* = 3.8 Hz, 1H), 5.48 (s, 2H). <sup>13</sup>C NMR (101 MHz, Chloroform-*d*) δ 150.28, 140.56, 137.01, 134.57, 129.45, 129.18, 129.00, 128.82, 128.68, 128.63, 125.04, 123.99, 121.56, 119.93, 107.45, 69.59. HRMS (EI) *m/z*: calcd for C<sub>16</sub>H<sub>12</sub>N<sub>2</sub>O<sub>4</sub>: 297.0143, found [M]<sup>+</sup>: 297.0145.

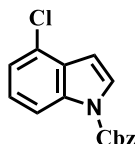

**benzyl 4-chloro-1*H*-indole-1-carboxylate (2e)** was prepared using 4-chloro-1*H*-indole and benzyl carbonochloridate according to the GP-1 as a pink solid (0.89 g, 63 %). Melting Point: 53-55 °C. <sup>1</sup>H NMR (400 MHz, Chloroform-*d*) δ 8.09 (s, 1H), 7.66 (d, *J* = 3.7 Hz, 1H), 7.52 – 7.45 (m, 2H), 7.45 – 7.35 (m, 3H), 7.27 – 7.20 (m, 2H), 6.71 (d, *J* = 3.8 Hz, 1H), 5.45 (s, 2H). <sup>13</sup>C NMR (101 MHz, Chloroform-*d*) δ 150.72, 136.07, 134.91, 129.35, 128.97, 128.92, 128.64, 126.31, 126.18, 125.34, 122.97, 113.83, 106.39, 69.12. HRMS (EI) *m/z*: calcd for C<sub>16</sub>H<sub>12</sub>ClNO<sub>2</sub>: 286.4593, found [M]<sup>+</sup>: 286.4589.

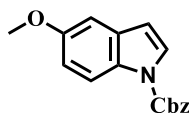

**benzyl 5-methoxy-1*H*-indole-1-carboxylate (2f)** was prepared using 5-methoxy-1*H*-indole and benzyl carbonochloridate according to the GP-1 as a white solid (0.87 g, 62 %). Melting Point: 71-73 °C. <sup>1</sup>H NMR (400 MHz, Chloroform-*d*) δ 8.07 (s, 1H), 7.61 (d, *J* = 3.7 Hz, 1H), 7.48 (d, *J* = 6.3 Hz, 2H), 7.46 – 7.33 (m, 3H), 7.03 (d, *J* = 2.6 Hz, 1H), 6.94 (dd, *J* = 9.1, 2.7 Hz, 1H), 6.52 (d, *J* = 3.6 Hz, 1H), 5.44 (s, 2H), 3.85 (s, 3H). <sup>13</sup>C NMR (101 MHz, Chloroform-*d*) δ 156.24, 135.29, 131.48, 128.87, 128.80, 128.54, 126.27, 115.97, 113.31, 108.18, 103.76, 68.71, 55.76. HRMS (EI) *m/z*: calcd for C<sub>17</sub>H<sub>15</sub>NO<sub>3</sub>: 282.0433, found [M]<sup>+</sup>: 282.0431.

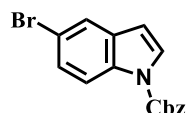

**benzyl 5-bromo-1*H*-indole-1-carboxylate (2g)** was prepared using 5-bromo-1*H*-indole and benzyl carbonochloridate according to the GP-2 as a white solid (1.40 g, 85 %). Melting Point: 76-78 °C. Spectroscopic data are in accordance with the reported in the literature<sup>6</sup>.

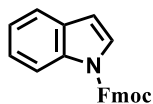

**(9H-fluoren-9-yl)methyl 1H-indole-1-carboxylate (2j)** was prepared using 1H-indole and (9H-fluoren-9-yl)methyl carbonochloridate according to the GP-1 as a yellow solid (0.85 g, 47 %). Spectroscopic data are in accordance with the reported in the literature<sup>7</sup>.

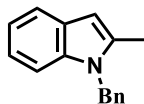

**1-benzyl-2-methyl-1H-indole (2'b)** was prepared using 2-methyl-1H-indole and (bromomethyl)benzene according to the GP-2 as a colourless oil (630 mg, 57 %). Spectroscopic data are in accordance with the reported in the literature<sup>8</sup>.

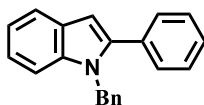

**1-benzyl-2-phenyl-1H-indole (2'c)** was prepared using 2-phenyl-1H-indole and (bromomethyl)benzene according to the GP-2 as a white solid (523 mg, 37 %). Spectroscopic data are in accordance with the reported in the literature<sup>5</sup>.

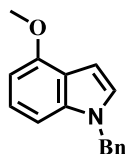

**1-benzyl-4-methoxy-1H-indole (2'd)** was prepared using 4-methoxy-1H-indole and (bromomethyl)benzene according to the GP-2 as a white solid (0.86 g, 73 %). Melting Point: 90-92 °C. <sup>1</sup>H NMR (400 MHz, Chloroform-*d*) δ 7.30 – 7.21 (m, 3H), 7.12 – 7.05 (m, 3H), 7.02 (q, *J* = 3.3 Hz, 1H), 6.89 (t, *J* = 7.2 Hz, 1H), 6.64 (s, 2H), 6.51 (s, 3H). <sup>13</sup>C NMR (101 MHz, Chloroform-*d*) δ 153.54, 137.90, 137.68, 128.82, 127.64, 126.88, 126.83, 122.62, 119.30, 103.28, 99.51, 99.05, 55.40, 50.36. HRMS (EI) *m/z*: calcd for C<sub>16</sub>H<sub>15</sub>NO: 238.0343, found [M]<sup>+</sup>: 238.0347.

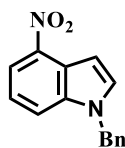

**1-benzyl-4-nitro-1H-indole (2'e)** was prepared using 4-nitro-1H-indole and (bromomethyl)benzene according to the GP-2 as a yellow solid (1.04 g, 83 %). Spectroscopic data are in accordance with the reported in the literature<sup>9</sup>.

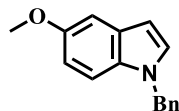

**1-benzyl-5-methoxy-1H-indole (2'f)** was prepared using 5-methoxy-1H-indole and (bromomethyl)benzene according to the GP-2 as a white solid (0.84 mg, 71 %). Spectroscopic data are in accordance with the reported in the literature<sup>10</sup>.

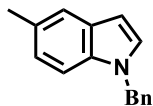

**methyl 1-benzyl-1*H*-indole-5-carboxylate (2'g)** was prepared using 5-fluoro-1*H*-indole and (bromomethyl)benzene according to the GP-2 as a white solid (0.74 g, 67 %). Spectroscopic data are in accordance with the reported in the literature<sup>11</sup>.

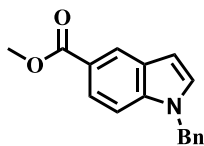

**1-benzyl-5-methoxy-1*H*-indole (2'h)** was prepared using 5-methoxy-1*H*-indole and (bromomethyl)benzene according to the GP-2 as a white solid (1.10 mg, 83 %). Spectroscopic data are in accordance with the reported in the literature<sup>12</sup>.

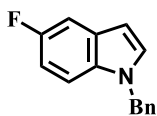

**1-benzyl-5-fluoro-1*H*-indole (2'i)** was prepared using 5-fluoro-1*H*-indole and (bromomethyl)benzene according to the GP-2 as a yellow oil (0.85 g, 76 %). Spectroscopic data are in accordance with the reported in the literature<sup>11</sup>.

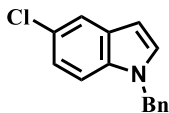

**1-benzyl-5-chloro-1*H*-indole (2'j)** was prepared using 5-chloro-1*H*-indole and (bromomethyl)benzene according to the GP-2 as a white solid (0.72 g, 60 %). Spectroscopic data are in accordance with the reported in the literature<sup>11</sup>.

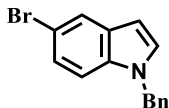

**1-benzyl-5-bromo-1*H*-indole (2'k)** was prepared using 5-bromo-1*H*-indole and (bromomethyl)benzene according to the GP-2 as a white solid (1.28 g, 90 %). Spectroscopic data are in accordance with the reported in the literature<sup>13</sup>.

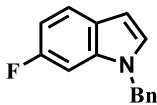

**1-benzyl-6-fluoro-1*H*-indole (2'm)** was prepared using 6-fluoro-1*H*-indole and (bromomethyl)benzene according to the GP-2 as a white solid (0.63 g, 56 %). Melting Point: 89-91 °C. Spectroscopic data are in accordance with the reported in the literature<sup>14</sup>.

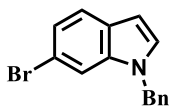

**1-benzyl-6-bromo-1*H*-indole (2'n)** was prepared using 6-bromo-1*H*-indole and (bromomethyl)benzene according to the GP-2 as a white solid (1.13 g, 79 %). <sup>1</sup>H NMR (400 MHz, Chloroform-*d*) δ 7.51 (d, *J* = 8.3 Hz, 1H), 7.44 (s, 1H), 7.35 – 7.27 (m, 3H), 7.22 (dd, *J* = 8.4, 1.8 Hz, 1H), 7.10 (q, *J* = 4.0, 3.1 Hz, 3H), 6.53 (d, *J* = 3.2 Hz, 1H), 5.28 (s, 2H). <sup>13</sup>C NMR (101 MHz, Chloroform-*d*) δ 137.25, 137.04, 128.98, 127.91, 127.64, 126.81, 122.96, 122.29, 115.47, 112.74, 102.08, 50.20. HRMS (EI) *m/z*: calcd for C<sub>15</sub>H<sub>12</sub>BrN: 286.9043, found [M]<sup>+</sup>: 286.9042.



## 5. General Procedure for the Preparation of 3.

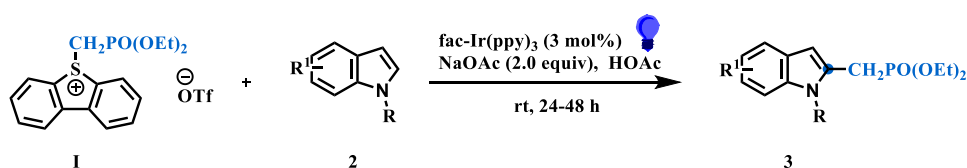

The mixture of indole 2 (0.2 mmol, 1.0 equiv.), reagent I (96.8 mg, 0.2 mmol, 1 equiv.), NaOAc (16.4 mg, 0.4 mmol, 2.0 equiv.), and the photocatalyst  $\text{fac-Ir}(\text{ppy})_3$  (2 mg, 3 mol%) in HOAc (2.0 mL) was stirred under irradiation of blue LEDs overnight at room temperature. Then another portion sulfonium salt (96.8 mg, 0.2 mmol, 1 equiv.) was added to the reaction solution and the mixture was stirred for 12-24 h under blue light. The progress of the reaction was monitored by TLC. After completion of the reaction, the solvent was removed under reduced pressure. The residue was purified by flash column chromatography on silica gel (dichloromethane: methanol = 20 : 1) to afford the desired product 3.

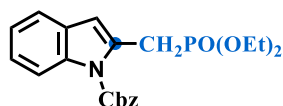

**benzyl 2-((diethoxyphosphoryl)methyl)-1H-indole-1-carboxylate (3a)** was prepared using benzyl 1H-indole-1-carboxylate and reagent I according to the general procedure as a yellow oil (35 mg, 44 %).  $^1\text{H}$  NMR (400 MHz, Chloroform-*d*)  $\delta$  8.04 (d,  $J = 7.9$  Hz, 1H), 7.51 (d,  $J = 7.2$  Hz, 2H), 7.49 – 7.31 (m, 4H), 7.21 (p,  $J = 7.2$  Hz, 2H), 6.63 (d,  $J = 4.4$  Hz, 1H), 5.47 (s, 2H), 4.01 (m, 4H), 3.77 (d,  $J = 21.6$  Hz, 2H), 1.22 (t,  $J = 7.1$  Hz, 6H).  $^{13}\text{C}$  NMR (101 MHz, Chloroform-*d*)  $\delta$  151.91, 136.67, 134.92, 131.07 (d,  $J = 10.2$  Hz), 129.11 (d,  $J = 3.7$  Hz), 128.91 (d,  $J = 4.4$  Hz), 124.25, 123.19, 120.35, 115.71, 111.07 (d,  $J = 8.8$  Hz), 69.10, 62.31 (d,  $J = 6.7$  Hz), 28.52, 27.11, 16.46 (d,  $J = 5.9$  Hz).  $^{31}\text{P}$  NMR (162 MHz, Chloroform-*d*)  $\delta$  24.83. HRMS (EI)  $m/z$ : calcd for:  $\text{C}_{21}\text{H}_{24}\text{NO}_5\text{P}$ : 402.1311, found  $[\text{M}]^+$ : 402.1302.

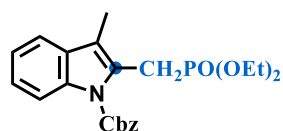

**benzyl 2-((diethoxyphosphoryl)methyl)-3-methyl-1H-indole-1-carboxylate (3b)** was prepared using benzyl 3-methyl-1H-indole-1-carboxylate and reagent I according to the general procedure as a yellow oil (149 mg, 36 %).  $^1\text{H}$  NMR (400 MHz, Chloroform-*d*)  $\delta$  8.08 – 8.00 (m, 1H), 7.54 – 7.48 (m, 2H), 7.47 – 7.29 (m, 4H), 7.26 – 7.17 (m, 2H), 5.46 (s, 2H), 4.04 – 3.86 (m, 4H), 3.81 (d,  $J = 21.9$  Hz, 2H), 2.23 (d,  $J = 4.6$  Hz, 3H), 1.18 (t,  $J = 7.1$  Hz, 6H).  $^{13}\text{C}$  NMR (101 MHz, Chloroform-*d*)  $\delta$  151.99, 136.06, 135.14, 130.42 (d,  $J = 4.0$  Hz), 128.95 – 128.63 (m), 126.52 (d,  $J = 14.2$  Hz), 124.38, 122.84, 118.45, 117.71 (d,  $J = 10.7$  Hz), 115.66, 68.88, 62.10 (d,  $J = 6.7$  Hz), 26.29, 24.87, 9.01.  $^{31}\text{P}$  NMR (162 MHz, Chloroform-*d*)  $\delta$  25.29. HRMS (EI)  $m/z$ : calcd for:  $\text{C}_{22}\text{H}_{26}\text{NO}_5\text{P}$ : 416.1581, found  $[\text{M}]^+$ : 416.1571.

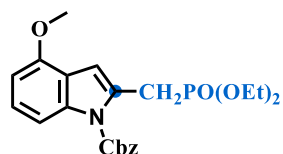

**benzyl 2-((diethoxyphosphoryl)methyl)-4-methoxy-1H-indole-1-carboxylate (3c)** was prepared using benzyl 3-methyl-1H-indole-1-carboxylate and reagent I according to the general procedure as

a yellow oil (44 mg, 51 %).  $^1\text{H}$  NMR (400 MHz, Chloroform-*d*)  $\delta$  7.65 (d,  $J$  = 8.6 Hz, 1H), 7.54 – 7.47 (m, 2H), 7.46 – 7.33 (m, 3H), 7.15 (t,  $J$  = 8.2 Hz, 1H), 6.72 (d,  $J$  = 4.6 Hz, 1H), 6.63 (d,  $J$  = 7.9 Hz, 1H), 5.46 (s, 2H), 4.00 (m,  $J$  = 7.2, 3.1 Hz, 4H), 3.90 (s, 2H), 3.75 (d,  $J$  = 21.5 Hz, 2H), 1.21 (t,  $J$  = 7.1 Hz, 6H).  $^{13}\text{C}$  NMR (101 MHz, Chloroform-*d*)  $\delta$  152.48, 151.99, 137.98, 134.93, 129.36 (d,  $J$  = 11.2 Hz), 128.89 (d,  $J$  = 7.6 Hz), 125.03, 119.40, 108.80, 107.97 (d,  $J$  = 9.4 Hz), 103.50, 69.12, 62.30 (d,  $J$  = 6.7 Hz), 55.50, 28.61, 27.20, 16.45 (d,  $J$  = 6.1 Hz).  $^{31}\text{P}$  NMR (162 MHz, Chloroform-*d*)  $\delta$  24.80. HRMS (EI)  $m/z$ : calcd for:  $\text{C}_{22}\text{H}_{26}\text{NO}_6\text{P}$ : 432.8894, found  $[\text{M}]^+$ : 432.8890.

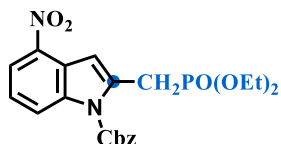

**benzyl 2-((diethoxyphosphoryl)methyl)-4-nitro-1H-indole-1-carboxylate (3d)** was prepared using benzyl 4-nitro-1H-indole-1-carboxylate and reagent I according to the general procedure as a yellow oil (30 mg, 34 %).  $^1\text{H}$  NMR (400 MHz, Chloroform-*d*)  $\delta$  8.41 (d,  $J$  = 8.3 Hz, 1H), 8.16 (d,  $J$  = 8.1 Hz, 1H), 7.55 – 7.48 (m, 2H), 7.46 – 7.38 (m, 3H), 7.38 – 7.28 (m, 2H), 5.50 (s, 2H), 4.09 – 3.96 (m, 4H), 3.80 (d,  $J$  = 22.1 Hz, 2H), 1.24 (t,  $J$  = 7.1 Hz, 6H).  $^{13}\text{C}$  NMR (101 MHz, Chloroform-*d*)  $\delta$  151.21, 139.82, 138.57, 136.09 (d,  $J$  = 11.6 Hz), 134.23, 129.21 (d,  $J$  = 5.4 Hz), 123.46, 121.81, 120.01, 109.82 (d,  $J$  = 9.2 Hz), 70.04, 62.56 (d,  $J$  = 6.7 Hz), 29.02, 27.62, 16.44 (d,  $J$  = 6.0 Hz).  $^{31}\text{P}$  NMR (162 MHz, Chloroform-*d*)  $\delta$  23.36. HRMS (EI)  $m/z$ : calcd for:  $\text{C}_{21}\text{H}_{23}\text{N}_2\text{O}_7\text{P}$ : 447.1281, found  $[\text{M}]^+$ : 447.1287.

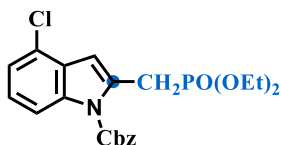

**benzyl 4-chloro-2-((diethoxyphosphoryl)methyl)-1H-indole-1-carboxylate (3e)** was prepared using benzyl 4-chloro-1H-indole-1-carboxylate and reagent I according to the general procedure as a yellow oil (31 mg, 36 %).  $^1\text{H}$  NMR (400 MHz, Chloroform-*d*)  $\delta$  7.95 (d,  $J$  = 8.0 Hz, 1H), 7.51 (dd,  $J$  = 7.6, 1.9 Hz, 2H), 7.46 – 7.34 (m, 3H), 7.17 (dt,  $J$  = 16.0, 7.8 Hz, 2H), 6.72 (d,  $J$  = 4.4 Hz, 1H), 5.48 (s, 2H), 4.11 – 3.96 (m, 4H), 3.78 (d,  $J$  = 21.8 Hz, 2H), 1.24 (t,  $J$  = 7.1 Hz, 6H).  $^{13}\text{C}$  NMR (101 MHz, Chloroform-*d*)  $\delta$  151.60, 137.38, 132.04 (d,  $J$  = 11.0 Hz), 128.97 (d,  $J$  = 9.8 Hz), 127.82, 125.52, 124.84, 122.95, 114.22, 108.87 (d,  $J$  = 9.2 Hz), 69.46, 62.39 (d,  $J$  = 6.7 Hz), 28.71, 27.30, 16.45 (d,  $J$  = 5.9 Hz).  $^{31}\text{P}$  NMR (162 MHz, Chloroform-*d*)  $\delta$  24.21. HRMS (EI)  $m/z$ : calcd for:  $\text{C}_{21}\text{H}_{23}\text{ClNO}_5\text{P}$ : 436.5731, found  $[\text{M}]^+$ : 436.5726.

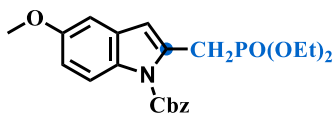

**benzyl 2-((diethoxyphosphoryl)methyl)-5-methoxy-1H-indole-1-carboxylate (3f)** was prepared using benzyl 5-methoxy-1H-indole-1-carboxylate and reagent I according to the general procedure as a yellow oil (31 mg, 36 %).  $^1\text{H}$  NMR (400 MHz, Chloroform-*d*)  $\delta$  7.91 (d,  $J$  = 9.1 Hz, 1H), 7.53 – 7.46 (m, 2H), 7.46 – 7.32 (m, 3H), 6.93 (d,  $J$  = 2.6 Hz, 1H), 6.83 (dd,  $J$  = 9.5, 2.7 Hz, 1H), 6.56 (d,  $J$  = 4.3 Hz, 1H), 5.45 (s, 2H), 4.09 – 3.93 (m, 4H), 3.81 (s, 3H), 3.76 (d,  $J$  = 21.6 Hz, 2H), 1.21 (t,  $J$  = 7.1 Hz, 6H).  $^{13}\text{C}$  NMR (101 MHz, Chloroform-*d*)  $\delta$  156.16, 151.81, 134.98, 131.73 (d,  $J$  = 9.9 Hz), 131.26, 129.96 (d,  $J$  = 3.6 Hz), 128.88, 116.54, 112.79, 111.00 (d,  $J$  = 8.7 Hz), 102.90, 68.99, 62.29 (d,  $J$  = 6.7 Hz), 55.70, 28.53, 27.12, 16.46 (d,  $J$  = 5.9 Hz).  $^{31}\text{P}$  NMR (162 MHz,

Chloroform-*d*)  $\delta$  24.85. HRMS (EI) *m/z*: calcd for: C<sub>22</sub>H<sub>26</sub>BrNO<sub>6</sub>P: 433.1571, found [M]<sup>+</sup>: 433.1566.

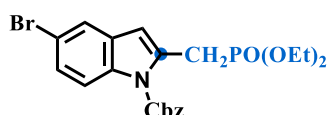

**benzyl 5-bromo-2-((diethoxyphosphoryl)methyl)-1H-indole-1-carboxylate (3g)** was prepared using benzyl 5-bromo-1H-indole-1-carboxylate and reagent I according to the general procedure as a yellow oil (32 mg, 33 %). <sup>1</sup>H NMR (400 MHz, Chloroform-*d*)  $\delta$  7.90 (d, *J* = 8.8 Hz, 1H), 7.58 (d, *J* = 1.9 Hz, 1H), 7.53 – 7.46 (m, 2H), 7.45 – 7.35 (m, 3H), 7.31 (dd, *J* = 9.0, 2.1 Hz, 1H), 6.55 (d, *J* = 4.4 Hz, 2H), 5.46 (s, 4H), 4.00 (pd, *J* = 7.1, 2.7 Hz, 4H), 3.74 (d, *J* = 22.0 Hz, 2H), 1.21 (t, *J* = 7.1 Hz, 6H). <sup>13</sup>C NMR (101 MHz, Chloroform-*d*)  $\delta$  151.55, 135.40, 134.64, 132.54 (d, *J* = 10.2 Hz), 130.78, 129.11 – 128.74 (m), 127.03, 122.89, 117.15, 116.49, 110.07 (d, *J* = 8.8 Hz), 69.40, 62.37 (d, *J* = 6.7 Hz), 28.56, 27.16, 16.46 (d, *J* = 6.0 Hz). <sup>31</sup>P NMR (162 MHz, Chloroform-*d*)  $\delta$  24.34. HRMS (EI) *m/z*: calcd for: C<sub>21</sub>H<sub>23</sub>BrNO<sub>5</sub>P: 481.0271, found [M]<sup>+</sup>: 481.0274.

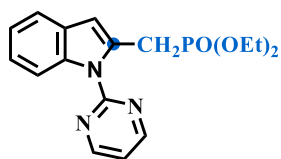

**diethyl ((1-(pyrimidin-2-yl)-1H-indol-2-yl)methyl)phosphonate (3h)** was prepared using 1-(pyrimidin-2-yl)-1H-indole and reagent I according to the general procedure as a yellow oil (40 mg, 58 %). <sup>1</sup>H NMR (400 MHz, Chloroform-*d*)  $\delta$  8.78 (d, *J* = 4.9 Hz, 2H), 8.25 (d, *J* = 8.1 Hz, 1H), 7.54 (d, *J* = 7.5 Hz, 1H), 7.27 – 7.11 (m, 3H), 6.68 (d, *J* = 4.2 Hz, 1H), 4.08 (d, *J* = 21.5 Hz, 2H), 4.00 – 3.81 (m, 4H), 1.11 (t, *J* = 7.1 Hz, 6H). <sup>13</sup>C NMR (101 MHz, Chloroform-*d*)  $\delta$  158.20, 137.25, 130.81, 130.71, 128.90, 123.23, 122.06, 120.17, 117.37, 113.96, 109.09, 109.00, 62.07 (d, *J* = 6.8 Hz), 28.14, 26.74, 16.36 (d, *J* = 5.9 Hz). <sup>31</sup>P NMR (162 MHz, Chloroform-*d*)  $\delta$  25.29. HRMS (EI) *m/z*: calcd for: C<sub>17</sub>H<sub>20</sub>N<sub>3</sub>O<sub>3</sub>P: 346.0712, found [M]<sup>+</sup>: 346.0710.

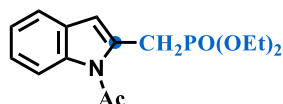

**diethyl ((1-acetyl-1H-indol-2-yl)methyl)phosphonate (3i)** was prepared using 1-(1H-indol-1-yl)ethan-1-one and reagent I according to the general procedure as a yellow oil (20 mg, 33 %). <sup>1</sup>H NMR (400 MHz, Chloroform-*d*)  $\delta$  7.66 (d, *J* = 8.3 Hz, 1H), 7.51 (d, *J* = 6.9 Hz, 1H), 7.30 – 7.19 (m, 2H), 6.64 (d, *J* = 4.5 Hz, 1H), 4.06 (p, *J* = 7.3 Hz, 4H), 3.81 (d, *J* = 21.6 Hz, 2H), 2.80 (s, 3H), 1.26 (t, *J* = 7.1 Hz, 6H). <sup>13</sup>C NMR (101 MHz, Chloroform-*d*)  $\delta$  171.03, 136.14, 131.97, 131.87, 129.62 (d), 123.98, 123.03, 120.94, 114.13, 111.39 (d, *J* = 8.9 Hz), 62.31 (d, *J* = 6.5 Hz), 29.77, 28.64, 27.67, 27.24, 16.46 (d, *J* = 6.4 Hz). <sup>31</sup>P NMR (162 MHz, Chloroform-*d*)  $\delta$  24.99. HRMS (EI) *m/z*: calcd for: C<sub>15</sub>H<sub>20</sub>NO<sub>4</sub>P: 310.0341, found [M]<sup>+</sup>: 310.0337.

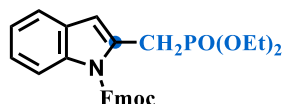

**(9H-fluoren-9-yl)methyl 2-((diethoxyphosphoryl)methyl)-1H-indole-1-carboxylate (3j)** was prepared using (9H-fluoren-9-yl)methyl 1H-indole-1-carboxylate and reagent I according to the general procedure as a yellow oil (49 mg, 50 %). <sup>1</sup>H NMR (400 MHz, Chloroform-*d*)  $\delta$  7.81 (d, *J* = 7.5 Hz, 2H), 7.63 (d, *J* = 7.5 Hz, 2H), 7.42 (td, *J* = 7.6, 5.1 Hz, 4H), 7.31 (t, *J* = 7.5 Hz, 2H), 7.14 (t, *J* = 7.5 Hz, 1H), 7.03 (t, *J* = 7.9 Hz, 1H), 6.62 (d, *J* = 4.1 Hz, 1H), 4.94 (d, *J* = 5.4 Hz, 2H), 4.45

(t,  $J = 5.5$  Hz, 1H), 4.10 – 3.92 (m, 4H), 3.73 (d,  $J = 21.6$  Hz, 2H), 1.20 (t,  $J = 7.0$  Hz, 6H).  $^{13}\text{C}$  NMR (101 MHz, Chloroform-*d*)  $\delta$  152.11, 143.40, 141.65, 136.24, 131.24 (d,  $J = 9.5$  Hz), 129.00, 128.13, 127.48, 124.80, 124.14, 123.08, 120.36, 120.26, 115.63, 111.14 (d,  $J = 8.8$  Hz), 68.54, 62.31 (d,  $J = 7.0$  Hz), 46.93, 28.12, 26.71, 16.47 (d,  $J = 5.9$  Hz).  $^{31}\text{P}$  NMR (162 MHz, Chloroform-*d*)  $\delta$  24.89. HRMS (EI)  $m/z$ : calcd for:  $\text{C}_{28}\text{H}_{28}\text{NO}_5\text{P}$ : 490.2402, found  $[\text{M}]^+$ : 490.2401.

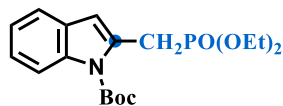

**tert-butyl 2-((diethoxyphosphoryl)methyl)-5-methoxy-1H-indole-1-carboxylate (3k)** was prepared using tert-butyl 1H-indole-1-carboxylate and reagent I according to the general procedure as a yellow oil (62 mg, 84 %).  $^1\text{H}$  NMR (400 MHz, Chloroform-*d*)  $\delta$  8.05 (d,  $J = 8.3$  Hz, 1H), 7.46 (d,  $J = 8.0$  Hz, 1H), 7.27 – 7.13 (m, 2H), 6.61 (d,  $J = 4.3$  Hz, 1H), 4.13 – 3.91 (m, 4H), 3.80 (d,  $J = 21.8$  Hz, 2H), 1.68 (s, 9H), 1.24 (t,  $J = 7.1$  Hz, 6H).  $^{13}\text{C}$  NMR (101 MHz, Chloroform-*d*)  $\delta$  150.55, 136.76, 131.03 (d,  $J = 10.2$  Hz), 125.51, 123.89, 122.80, 120.23, 115.63, 110.38 (d,  $J = 9.0$  Hz), 84.41, 62.29 (d,  $J = 6.8$  Hz), 28.58, 28.25, 27.18, 16.47 (d,  $J = 6.1$  Hz).  $^{31}\text{P}$  NMR (162 MHz, Chloroform-*d*)  $\delta$  25.18. HRMS (EI)  $m/z$ : calcd for:  $\text{C}_{18}\text{H}_{26}\text{NO}_5\text{P}$ : 368.1141, found  $[\text{M}]^+$ : 368.1135.

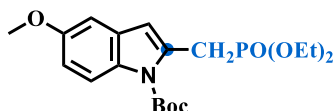

**tert-butyl 2-((diethoxyphosphoryl)methyl)-5-methoxy-1H-indole-1-carboxylate (3l)** was prepared using tert-butyl 5-methoxy-1H-indole-1-carboxylate and reagent I according to the general procedure as an orange oil (30 mg, 38 %).  $^1\text{H}$  NMR (400 MHz, Chloroform-*d*)  $\delta$  7.93 (d,  $J = 9.1$  Hz, 1H), 6.92 (d,  $J = 2.6$  Hz, 1H), 6.84 (dd,  $J = 9.0, 2.6$  Hz, 1H), 6.54 (d,  $J = 4.2$  Hz, 1H), 4.12 – 3.97 (m, 4H), 3.81 (s, 3H), 3.78 (d,  $J = 21.6$  Hz, 2H), 1.67 (s, 9H), 1.24 (t,  $J = 7.1$  Hz, 6H).  $^{13}\text{C}$  NMR (101 MHz, Chloroform-*d*)  $\delta$  155.91, 150.47, 132.88 – 130.58 (m), 129.74 (d,  $J = 3.6$  Hz), 116.44, 112.58, 110.28 (d,  $J = 8.7$  Hz), 102.70, 84.24, 62.27 (d,  $J = 6.7$  Hz), 55.70, 28.61, 28.25, 27.20, 16.47 (d,  $J = 6.3$  Hz).  $^{31}\text{P}$  NMR (162 MHz, Chloroform-*d*)  $\delta$  25.13. HRMS (EI)  $m/z$ : calcd for:  $\text{C}_{19}\text{H}_{28}\text{NO}_6\text{P}$ : 397.1404, found  $[\text{M}]^+$ : 398.1405.

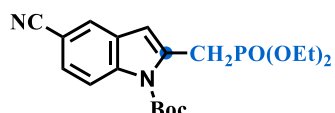

**tert-butyl 5-cyano-2-((diethoxyphosphoryl)methyl)-1H-indole-1-carboxylate (3m)** was prepared using tert-butyl 5-cyano-1H-indole-1-carboxylate and reagent I according to the general procedure as a yellow oil (37 mg, 47 %).  $^1\text{H}$  NMR (400 MHz, Chloroform-*d*)  $\delta$  8.13 (d,  $J = 8.8$  Hz, 1H), 7.78 (s, 1H), 7.47 (dd,  $J = 8.7, 1.7$  Hz, 1H), 6.64 (d,  $J = 4.2$  Hz, 1H), 4.23 – 3.95 (m, 4H), 3.78 (d,  $J = 21.9$  Hz, 2H), 1.69 (s, 9H), 1.24 (t,  $J = 7.1$  Hz, 6H).  $^{13}\text{C}$  NMR (101 MHz, Chloroform-*d*)  $\delta$  149.79, 138.65, 133.87 (d,  $J = 10.3$  Hz), 128.87, 126.99, 119.83, 116.39, 109.60 (d,  $J = 8.7$  Hz), 106.18, 85.79, 62.43 (d,  $J = 6.6$  Hz), 29.76, 28.69, 28.15, 27.28, 16.47 (d,  $J = 5.8$  Hz).  $^{31}\text{P}$  NMR (162 MHz, Chloroform-*d*)  $\delta$  24.24. HRMS (EI)  $m/z$ : calcd for:  $\text{C}_{19}\text{H}_{25}\text{N}_2\text{O}_5\text{P}$ : 393.1241, found  $[\text{M}]^+$ : 393.1243.

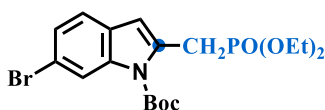

**tert-butyl 6-bromo-2-((diethoxyphosphoryl)methyl)-1H-indole-1-carboxylate (3n)** was

prepared using tert-butyl 6-bromo-1*H*-indole-1-carboxylate and reagent I according to the general procedure as a brown oil (46 mg, 51 %). <sup>1</sup>H NMR (400 MHz, Chloroform-*d*) δ 8.27 (s, 1H), 7.30 (d, *J* = 2.3 Hz, 1H), 6.56 (d, *J* = 4.3 Hz, 1H), 4.04 (m, 4H), 3.76 (d, *J* = 21.7 Hz, 2H), 1.68 (s, 2H), 1.23 (t, *J* = 7.1 Hz, 6H). <sup>13</sup>C NMR (101 MHz, Chloroform-*d*) δ 150.08, 137.45, 131.69 (d), 127.70, 126.03, 121.22, 118.88, 117.60, 109.99 (d, *J* = 8.8 Hz), 85.10, 62.34 (d, *J* = 6.6 Hz), 28.65, 28.16, 27.24, 16.48 (d, *J* = 5.9 Hz). <sup>31</sup>P NMR (162 MHz, Chloroform-*d*) δ 24.64. HRMS (EI) *m/z*: calcd for: C<sub>18</sub>H<sub>25</sub>BrNO<sub>5</sub>P: 447.0102, found [M]<sup>+</sup>: 447.0105.

## 6. General Procedure for the Preparation of 4.

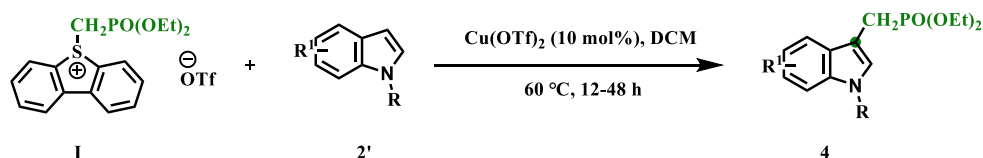

A mixture of indole 2 (0.2 mmol, 1.0 equiv.), reagent I (106.5 mg, 0.22 mmol, 1.1 equiv.) and Cu(OTf)<sub>2</sub> (7.2 mg, 10 mol%) in DCM (2.0 mL) was stirred at 60 °C overnight. The course of the reaction was monitored with thin layer chromatography (TLC). The reaction mixture was then cooled to the room temperature and quenched with water and the aqueous layer was extracted with ethyl acetate. The combined organic layer was dried over Na<sub>2</sub>SO<sub>4</sub> and evaporated to leave a residue, which was purified by flash chromatography (dichloromethane: methanol = 20 : 1).

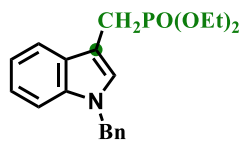

**diethyl ((1-benzyl-1*H*-indol-3-yl)methyl)phosphonate (4a)** was prepared using 1-benzyl-1*H*-indole and reagent I according to the general procedure as a brown solid (51 mg, 72 %). <sup>1</sup>H NMR (400 MHz, Chloroform-*d*) δ 7.64 (d, *J* = 7.5 Hz, 1H), 7.32 – 7.22 (m, 4H), 7.20 – 7.06 (m, 5H), 5.28 (s, 2H), 4.09 – 3.90 (m, 4H), 3.30 (d, *J* = 20.4 Hz, 2H), 1.20 (t, *J* = 7.1 Hz, 6H). <sup>13</sup>C NMR (101 MHz, Chloroform-*d*) δ 137.58, 136.47, 128.81, 128.34 (d, *J* = 6.1 Hz), 127.70, 127.60 (d, *J* = 6.9 Hz), 126.90, 122.02, 119.44, 119.25, 109.79, 104.47 (d, *J* = 9.6 Hz), 62.11 (d, *J* = 6.7 Hz), 50.12, 23.83, 22.40, 16.48 (d, *J* = 5.8 Hz). <sup>31</sup>P NMR (162 MHz, Chloroform-*d*) δ 28.06. HRMS (EI) *m/z*: calcd for: C<sub>20</sub>H<sub>24</sub>NO<sub>3</sub>P: 358.1221, found [M]<sup>+</sup>: 358.1220.

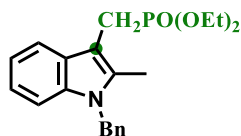

**diethyl ((1-benzyl-2-methyl-1*H*-indol-3-yl)methyl)phosphonate (4b)** was prepared using 1-benzyl-2-methyl-1*H*-indole and reagent I according to the general procedure as a yellow oil (27 mg, 36 %). <sup>1</sup>H NMR (400 MHz, Chloroform-*d*) δ 7.59 (dt, *J* = 7.2, 3.6 Hz, 1H), 7.27 – 7.16 (m, 4H), 7.11 (dt, *J* = 5.9, 3.4 Hz, 2H), 7.01 – 6.85 (m, 2H), 5.30 (s, 2H), 4.05 – 3.86 (m, 4H), 3.29 (d, *J* = 19.5 Hz, 2H), 2.35 (d, *J* = 3.5 Hz, 3H), 1.18 (t, *J* = 7.0 Hz, 6H). <sup>13</sup>C NMR (101 MHz, Chloroform-*d*) δ 137.94, 136.53, 134.74 (d, *J* = 7.8 Hz), 128.83, 127.98, 127.37, 126.06, 121.20, 119.48, 118.53, 109.11, 101.32 (d, *J* = 10.4 Hz), 62.00 (d, *J* = 6.8 Hz), 46.72, 23.93, 22.49, 16.52 (d, *J* = 5.8 Hz), 10.67. <sup>31</sup>P NMR (162 MHz, Chloroform-*d*) δ 27.96. HRMS (EI) *m/z*: calcd for: C<sub>21</sub>H<sub>26</sub>NO<sub>3</sub>P: 372.1490, found [M]<sup>+</sup>: 372.1495.

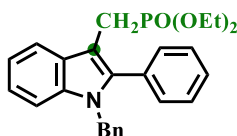

**diethyl ((1-benzyl-2-phenyl-1H-indol-3-yl)methyl)phosphonate (4c)** was prepared using 1-benzyl-2-phenyl-1H-indole and reagent I according to the general procedure as a yellow oil (59 mg, 68 %).  $^1\text{H}$  NMR (400 MHz, Chloroform-*d*)  $\delta$  7.84 (dd,  $J = 6.9, 2.6$  Hz, 1H), 7.53 – 7.46 (m, 2H), 7.46 – 7.36 (m, 3H), 7.27 – 7.12 (m, 6H), 6.92 (dd,  $J = 7.4, 2.0$  Hz, 2H), 5.23 (s, 2H), 4.06 – 3.86 (m, 4H), 3.29 (d,  $J = 20.3$  Hz, 2H), 1.21 (t,  $J = 7.1$  Hz, 6H).  $^{13}\text{C}$  NMR (101 MHz, Chloroform-*d*)  $\delta$  139.67 (d,  $J = 9.6$  Hz), 138.26, 131.22, 130.87, 128.82 – 128.53 (m), 128.04, 127.21, 126.16, 122.31, 120.37, 119.90, 110.38, 103.48 (d,  $J = 9.7$  Hz), 61.92 (d,  $J = 6.7$  Hz), 47.85, 24.56, 23.12, 16.53 (d,  $J = 6.1$  Hz).  $^{31}\text{P}$  NMR (162 MHz, Chloroform-*d*)  $\delta$  28.10. HRMS (EI)  $m/z$ : calcd for:  $\text{C}_{26}\text{H}_{28}\text{FNO}_3\text{P}$ : 434.2201, found  $[\text{M}]^+$ : 434.2203.

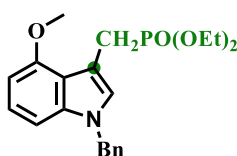

**diethyl ((1-benzyl-4-methoxy-1H-indol-3-yl)methyl)phosphonate (4d)** was prepared using 1-benzyl-4-methoxy-1H-indole and reagent I according to the general procedure as a brown oil (39 mg, 50 %).  $^1\text{H}$  NMR (400 MHz, Chloroform-*d*)  $\delta$  7.30 – 7.16 (m, 3H), 7.12 (d,  $J = 3.3$  Hz, 1H), 7.10 – 7.00 (m, 3H), 6.85 (d,  $J = 8.3$  Hz, 1H), 6.47 (d,  $J = 7.8$  Hz, 1H), 5.23 (s, 2H), 4.12 – 4.00 (m, 4H), 3.90 (s, 3H), 3.65 (d,  $J = 20.3$  Hz, 2H), 1.20 (t,  $J = 7.0$  Hz, 6H).  $^{13}\text{C}$  NMR (101 MHz, Chloroform-*d*)  $\delta$  154.95, 137.90, 128.77, 127.63, 126.85, 126.50 (d,  $J = 6.3$  Hz), 122.67, 118.05 (d,  $J = 7.9$  Hz), 104.52 (d,  $J = 9.0$  Hz), 103.33, 99.61, 61.91 (d,  $J = 6.7$  Hz), 55.16, 50.26, 24.37, 22.97, 16.47 (d,  $J = 5.9$  Hz).  $^{31}\text{P}$  NMR (162 MHz, Chloroform-*d*)  $\delta$  29.14. HRMS (EI)  $m/z$ : calcd for:  $\text{C}_{21}\text{H}_{26}\text{NO}_4\text{P}$ : 388.1481, found  $[\text{M}]^+$ : 388.1476.

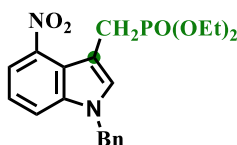

**diethyl ((1-benzyl-4-nitro-1H-indol-3-yl)methyl)phosphonate (4e)** was prepared using 1-benzyl-4-nitro-1H-indole and reagent I according to the general procedure as a brown solid (19 mg, 23 %). Melting Point: 112-114 °C.  $^1\text{H}$  NMR (400 MHz, Chloroform-*d*)  $\delta$  7.82 (d,  $J = 7.8$  Hz, 1H), 7.51 (d,  $J = 8.3$  Hz, 1H), 7.39 (d,  $J = 3.5$  Hz, 1H), 7.34 – 7.23 (m, 3H), 7.17 (t,  $J = 8.0$  Hz, 1H), 7.08 (dd,  $J = 7.3, 2.2$  Hz, 2H), 5.33 (s, 2H), 4.04 – 3.86 (m, 4H), 3.53 (d,  $J = 20.3$  Hz, 2H), 1.16 (t,  $J = 7.0$  Hz, 6H).  $^{13}\text{C}$  NMR (101 MHz, Chloroform-*d*)  $\delta$  143.64, 139.06, 136.21, 132.85 (d,  $J = 7.8$  Hz), 129.08, 128.22, 126.83, 120.67, 119.88 (d,  $J = 5.2$  Hz), 118.08, 115.82, 104.57 (d,  $J = 10.6$  Hz), 62.05 (d,  $J = 7.0$  Hz), 50.63, 25.57, 24.14, 16.33 (d,  $J = 6.2$  Hz).  $^{31}\text{P}$  NMR (162 MHz, Chloroform-*d*)  $\delta$  28.12. HRMS (EI)  $m/z$ : calcd for:  $\text{C}_{20}\text{H}_{23}\text{N}_2\text{O}_5\text{P}$ : 403.1194, found  $[\text{M}]^+$ : 403.1191.

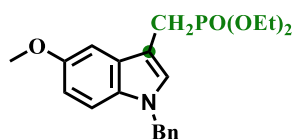

**diethyl ((1-benzyl-5-methoxy-1H-indol-3-yl)methyl)phosphonate (4f)** was prepared using 1-

methyl-1*H*-indole and reagent I according to the general procedure as a orange oil (39 mg, 50 %). <sup>1</sup>H NMR (400 MHz, Chloroform-*d*) δ 7.25 (qt, *J* = 6.0, 3.5 Hz, 3H), 7.16 – 7.05 (m, 5H), 6.81 (dd, *J* = 8.8, 2.4 Hz, 1H), 5.23 (s, 2H), 4.09 – 3.90 (m, 1H), 3.85 (s, 3H), 3.26 (d, *J* = 20.1 Hz, 2H), 1.20 (t, *J* = 7.1 Hz, 6H). <sup>13</sup>C NMR (101 MHz, Chloroform-*d*) δ 154.17, 137.65, 131.76, 128.80, 128.67 (d, *J* = 6.5 Hz), 128.20 (d, *J* = 7.5 Hz), 127.69, 126.83, 112.40, 110.65, 103.87 (d, *J* = 8.8 Hz), 100.96, 62.12 (d, *J* = 6.7 Hz), 55.95, 50.31, 29.78, 23.96, 22.53, 16.52 (d, *J* = 5.9 Hz). <sup>31</sup>P NMR (162 MHz, Chloroform-*d*) δ 28.18. HRMS (EI) *m/z*: calcd for: C<sub>21</sub>H<sub>26</sub>NO<sub>4</sub>P: 388.1481, found [M]<sup>+</sup>: 388.1484.

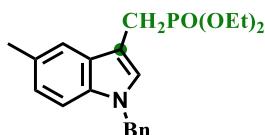

diethyl ((1-benzyl-5-methyl-1*H*-indol-3-yl)methyl)phosphonate (**4g**) was prepared using 1-benzyl-5-methyl-1*H*-indole and reagent I according to the general procedure as a brown oil (30 mg, 40 %). <sup>1</sup>H NMR (400 MHz, Chloroform-*d*) δ 7.42 (s, 1H), 7.29 – 7.20 (m, 3H), 7.15 – 7.11 (m, 2H), 7.14 – 7.01 (m, 2H), 6.98 (d, *J* = 8.2 Hz, 1H), 5.25 (s, 2H), 4.09 – 3.90 (m, 4H), 3.27 (d, *J* = 20.1 Hz, 2H), 2.44 (s, 3H), 1.20 (t, *J* = 7.1 Hz, 6H). <sup>13</sup>C NMR (101 MHz, Chloroform-*d*) δ 137.74, 134.89, 128.72 (d, *J* = 12.9 Hz), 128.56 (d, *J* = 6.7 Hz), 127.68 (d, *J* = 8.4 Hz), 126.85, 123.65, 118.93, 109.51, 103.79 (d, *J* = 9.0 Hz), 62.11 (d, *J* = 6.9 Hz), 50.15, 23.82, 22.40, 21.55, 16.48 (d, *J* = 6.4 Hz). <sup>31</sup>P NMR (162 MHz, Chloroform-*d*) δ 28.20. HRMS (EI) *m/z*: calcd for: C<sub>21</sub>H<sub>26</sub>NO<sub>3</sub>P: 372.1493, found [M]<sup>+</sup>: 372.1489.

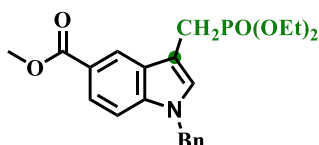

methyl 1-benzyl-3-((diethoxyphosphoryl)methyl)-1*H*-indole-5-carboxylate (**4h**) was prepared using methyl 1-benzyl-1*H*-indole-5-carboxylate and reagent I according to the general procedure as a yellow oil (59 mg, 61 %). <sup>1</sup>H NMR (400 MHz, Chloroform-*d*) δ 8.40 (s, 1H), 7.86 (d, *J* = 8.6 Hz, 1H), 7.28 – 7.19 (m, 5H), 7.08 (d, *J* = 6.4 Hz, 2H), 5.28 (s, 2H), 4.09 – 3.92 (m, 4H), 3.90 (s, 1H), 3.30 (d, *J* = 20.3 Hz, 2H), 1.20 (t, *J* = 7.1 Hz, 6H). <sup>13</sup>C NMR (101 MHz, Chloroform-*d*) δ 168.15, 138.93, 136.90, 128.98 (d, *J* = 9.0 Hz), 126.91, 123.44, 122.44, 121.57, 109.52, 106.42 (d, *J* = 9.0 Hz), 62.19 (d, *J* = 6.7 Hz), 51.92, 50.31, 23.77, 22.34, 16.45 (d, *J* = 5.7 Hz). <sup>31</sup>P NMR (162 MHz, Chloroform-*d*) δ 27.47. HRMS (EI) *m/z*: calcd for: C<sub>22</sub>H<sub>26</sub>NO<sub>5</sub>P: 416.1579, found [M]<sup>+</sup>: 416.1583.

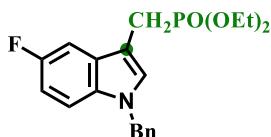

diethyl ((1-benzyl-5-fluoro-1*H*-indol-3-yl)methyl)phosphonate (**4i**) was prepared using 1-benzyl-5-fluoro-1*H*-indole and reagent I according to the general procedure as a yellow oil (42 mg, 56 %). <sup>1</sup>H NMR (400 MHz, Chloroform-*d*) δ 7.32 – 7.23 (m, 4H), 7.20 (d, *J* = 3.4 Hz, 1H), 7.13 (dd, *J* = 8.9, 4.3 Hz, 1H), 7.10 – 7.04 (m, 1H), 6.89 (td, *J* = 9.1, 2.6 Hz, 1H), 5.25 (s, 2H), 4.00 (m, *J* = 7.1 Hz, 4H), 3.22 (d, *J* = 20.2 Hz, 2H), 1.21 (t, *J* = 7.1 Hz, 6H). <sup>13</sup>C NMR (101 MHz, Chloroform-*d*) δ 159.14, 156.80, 137.25, 133.05, 129.28 (d, *J* = 7.4 Hz), 128.88, 128.66 (dd, *J* = 9.6, 5.9 Hz), 127.84, 126.84, 110.56 (d, *J* = 8.6 Hz), 110.33, 104.52 (dd), 104.28 (d, *J* = 24.0 Hz), 62.15 (d, *J* =

6.6 Hz), 50.43, 23.91, 22.48, 16.48 (d,  $J = 5.8$  Hz).  $^{19}\text{F}$  NMR (377 MHz, Chloroform- $d$ )  $\delta$  -124.72.  $^{31}\text{P}$  NMR (162 MHz, Chloroform- $d$ )  $\delta$  27.78. HRMS (EI)  $m/z$ : calcd for:  $\text{C}_{20}\text{H}_{23}\text{FNO}_3\text{P}$ : 376.1125, found  $[\text{M}]^+$ : 376.1122.

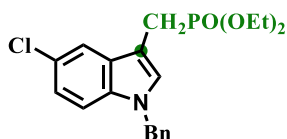

**diethyl ((1-benzyl-5-chloro-1H-indol-3-yl)methyl)phosphonate (4j)** was prepared using 1-benzyl-5-chloro-1H-indole and reagent I according to the general procedure as a yellow oil (47 mg, 66 %).  $^1\text{H}$  NMR (400 MHz, Chloroform- $d$ )  $\delta$  7.61 (d,  $J = 2.0$  Hz, 1H), 7.26 (q,  $J = 6.5$  Hz, 3H), 7.18 (d,  $J = 3.6$  Hz, 1H), 7.13 (d,  $J = 8.6$  Hz, 1H), 7.11 – 7.04 (m, 3H), 5.23 (s, 2H), 4.09 – 3.91 (m, 4H), 3.22 (d,  $J = 20.2$  Hz, 2H), 1.21 (t,  $J = 7.1$  Hz, 6H).  $^{13}\text{C}$  NMR (101 MHz, Chloroform- $d$ )  $\delta$  137.09, 134.87, 129.32 (d,  $J = 6.0$  Hz), 128.98 (d,  $J = 7.7$  Hz), 128.90, 127.89, 126.84, 125.37, 122.35, 118.93, 110.93, 104.33 (d,  $J = 9.3$  Hz), 62.17 (d,  $J = 6.8$  Hz), 50.34, 23.83, 22.40, 16.48 (d,  $J = 5.9$  Hz).  $^{31}\text{P}$  NMR (162 MHz, Chloroform- $d$ )  $\delta$  27.56. HRMS (EI)  $m/z$ : calcd for:  $\text{C}_{20}\text{H}_{23}\text{ClNO}_3\text{P}$ : 392.5648, found  $[\text{M}]^+$ : 392.5645.

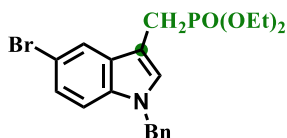

**diethyl ((1-benzyl-5-bromo-1H-indol-3-yl)methyl)phosphonate (4k)** was prepared using 5-bromo-1-methyl-1H-indole and reagent I according to the general procedure as a yellow oil (47 mg, 65 %).  $^1\text{H}$  NMR (400 MHz, Chloroform- $d$ )  $\delta$  7.76 (d,  $J = 1.9$  Hz, 1H), 7.33 – 7.18 (m, 4H), 7.16 (d,  $J = 3.6$  Hz, 1H), 7.09 (d,  $J = 8.7$  Hz, 1H), 7.07 – 7.03 (m, 2H), 5.23 (s, 2H), 4.00 (m, 4H), 3.22 (d,  $J = 20.2$  Hz, 2H), 1.21 (t,  $J = 7.1$  Hz, 6H).  $^{13}\text{C}$  NMR (101 MHz, Chloroform- $d$ )  $\delta$  137.04, 135.14, 129.95 (d,  $J = 5.9$  Hz), 128.85 (d,  $J = 10.7$  Hz), 127.91, 126.83, 124.89, 122.05, 112.89, 111.37, 104.26 (d,  $J = 8.9$  Hz), 62.20 (d,  $J = 6.8$  Hz), 50.33, 23.83, 22.40, 16.48 (d,  $J = 5.9$  Hz).  $^{31}\text{P}$  NMR (162 MHz, Chloroform- $d$ )  $\delta$  27.53. HRMS (EI)  $m/z$ : calcd for:  $\text{C}_{20}\text{H}_{23}\text{BrNO}_3\text{P}$ : 437.0183, found  $[\text{M}]^+$ : 437.0180.

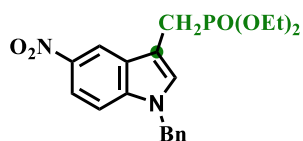

**diethyl ((1-benzyl-5-nitro-1H-indol-3-yl)methyl)phosphonate (4l)** was prepared using 1-benzyl-5-nitro-1H-indole and reagent I according to the general procedure as a brown oil (40 mg, 52 %).  $^1\text{H}$  NMR (400 MHz, Chloroform- $d$ )  $\delta$  7.25 (qt,  $J = 6.0, 3.5$  Hz, 3H), 7.16 – 7.05 (m, 5H), 6.81 (dd,  $J = 8.8, 2.4$  Hz, 1H), 5.23 (s, 2H), 4.09 – 3.90 (m, 1H), 3.85 (s, 3H), 3.26 (d,  $J = 20.1$  Hz, 2H), 1.20 (t,  $J = 7.1$  Hz, 6H).  $^{13}\text{C}$  NMR (101 MHz, Chloroform- $d$ )  $\delta$  154.17, 137.65, 131.76, 128.80, 128.67 (d,  $J = 6.5$  Hz), 128.20 (d,  $J = 7.5$  Hz), 127.69, 126.83, 112.40, 110.65, 103.87 (d,  $J = 8.8$  Hz), 100.96, 62.12 (d,  $J = 6.7$  Hz), 55.95, 50.31, 29.78, 23.96, 22.53, 16.52 (d,  $J = 5.9$  Hz).  $^{31}\text{P}$  NMR (162 MHz, Chloroform- $d$ )  $\delta$  28.18. HRMS (EI)  $m/z$ : calcd for:  $\text{C}_{20}\text{H}_{23}\text{N}_2\text{O}_5\text{P}$ : 403.1190, found  $[\text{M}]^+$ : 403.1186.



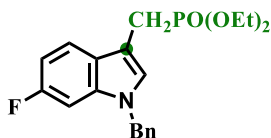

**diethyl ((1-benzyl-6-fluoro-1H-indol-3-yl)methyl)phosphonate (4m)** was prepared using 1-benzyl-6-fluoro-1H-indole and reagent I according to the general procedure as a yellow oil (50 mg, 67 %). <sup>1</sup>H NMR (400 MHz, Chloroform-*d*) δ 7.54 (dd, *J* = 8.6, 5.2 Hz, 1H), 7.33 – 7.17 (m, 3H), 7.12 (d, *J* = 3.6 Hz, 1H), 7.11 – 7.05 (m, 2H), 6.87 (ddd, *J* = 17.4, 9.3, 2.3 Hz, 2H), 5.19 (s, 2H), 4.08 – 3.89 (m, 4H), 3.25 (d, *J* = 20.3 Hz, 2H), 1.19 (t, *J* = 7.0 Hz, 6H). <sup>13</sup>C NMR (101 MHz, Chloroform-*d*) δ 161.26, 158.90, 137.06, 136.50 (d, *J* = 12.2 Hz), 128.90, 127.96 (d, *J* = 4.1 Hz), 127.87, 126.89, 124.85 (d, *J* = 6.0 Hz), 120.25 (d, *J* = 10.0 Hz), 108.25 (d, *J* = 24.7 Hz), 104.83 (d, *J* = 9.0 Hz), 96.25 (d, *J* = 26.1 Hz), 62.16 (d, *J* = 6.7 Hz), 50.29, 23.92, 22.49, 16.48 (d, *J* = 5.9 Hz). <sup>19</sup>F NMR (376 MHz, Chloroform-*d*) δ -120.43. <sup>31</sup>P NMR (162 MHz, Chloroform-*d*) δ 27.77. HRMS (EI) *m/z*: calcd for: C<sub>20</sub>H<sub>23</sub>FNO<sub>3</sub>P: 376.1127, found [M]<sup>+</sup>: 376.1125.

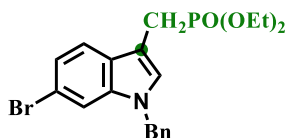

**diethyl ((1-benzyl-6-bromo-1H-indol-3-yl)methyl)phosphonate (4n)** was prepared using 1-benzyl-6-bromo-1H-indole and reagent I according to the general procedure as a offwhite solid (61 mg, 70 %). <sup>1</sup>H NMR (400 MHz, Chloroform-*d*) δ 7.50 (d, *J* = 8.6 Hz, 1H), 7.40 (d, *J* = 1.8 Hz, 1H), 7.31 – 7.23 (m, 3H), 7.21 (dd, *J* = 8.4, 1.8 Hz, 1H), 7.11 (d, *J* = 3.6 Hz, 1H), 7.07 (dd, *J* = 7.5, 2.0 Hz, 2H), 5.21 (s, 2H), 4.13 – 3.79 (m, 4H), 3.24 (d, *J* = 20.3 Hz, 2H), 1.19 (t, *J* = 7.0 Hz, 6H). <sup>13</sup>C NMR (101 MHz, Chloroform-*d*) δ 137.28, 136.96, 128.94, 128.19 (d, *J* = 7.7 Hz), 127.94, 127.17 (d, *J* = 5.9 Hz), 126.85, 122.79, 120.71, 115.81, 112.75, 105.00 (d, *J* = 9.5 Hz), 62.18 (d, *J* = 6.7 Hz), 50.14, 23.85, 22.42, 16.50 (d, *J* = 5.8 Hz). <sup>31</sup>P NMR (162 MHz, Chloroform-*d*) δ 27.63. HRMS (EI) *m/z*: calcd for: C<sub>20</sub>H<sub>23</sub>BrNO<sub>3</sub>P: 435.7922, found [M]<sup>+</sup>: 435.7918.

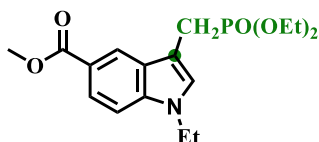

**methyl 3-((diethoxyphosphoryl)methyl)-1-ethyl-1H-indole-5-carboxylate (4o)** was prepared using methyl 1-ethyl-1H-indole-5-carboxylate and reagent I according to the general procedure as a yellow oil (52 mg, 74 %). <sup>1</sup>H NMR (400 MHz, Chloroform-*d*) δ 8.37 (d, *J* = 1.6 Hz, 1H), 7.88 (dd, *J* = 8.7, 1.6 Hz, 1H), 7.28 (d, *J* = 8.7 Hz, 1H), 7.20 (d, *J* = 3.5 Hz, 1H), 4.12 (q, *J* = 7.3 Hz, 2H), 4.06 – 3.94 (m, 4H), 3.90 (s, 3H), 3.28 (d, *J* = 20.4 Hz, 2H), 1.42 (t, *J* = 7.3 Hz, 3H), 1.20 (t, *J* = 7.1 Hz, 6H). <sup>13</sup>C NMR (101 MHz, Chloroform-*d*) δ 168.25, 138.34, 127.80 (dd, *J* = 13.9, 7.0 Hz), 123.06, 122.39, 121.17, 109.05, 105.72 (d, *J* = 9.1 Hz), 62.14 (d, *J* = 6.6 Hz), 51.87, 41.23, 23.72, 22.29, 16.43 (d, *J* = 5.9 Hz), 15.47. <sup>31</sup>P NMR (162 MHz, Chloroform-*d*) δ 27.63. HRMS (EI) *m/z*: calcd for: C<sub>17</sub>H<sub>24</sub>NO<sub>5</sub>P: 354.0870, found [M]<sup>+</sup>: 354.0871.

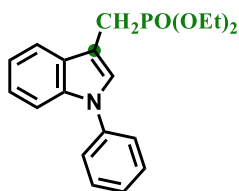

**diethyl ((1-phenyl-1*H*-indol-3-yl)methyl)phosphonate (4p)** was prepared using 1-phenyl-1*H*-indole and reagent I according to the general procedure as a purple solid (38 mg, 55 %). <sup>1</sup>H NMR (400 MHz, Chloroform-*d*) δ 7.68 (dd, *J* = 7.3, 1.7 Hz, 1H), 7.57 – 7.42 (m, 5H), 7.39 (d, *J* = 3.6 Hz, 1H), 7.33 (dq, *J* = 5.7, 3.0 Hz, 1H), 7.27 – 7.12 (m, 2H), 4.14 – 3.96 (m, 4H), 3.35 (d, *J* = 20.3 Hz, 2H), 1.25 (t, *J* = 7.1 Hz, 6H). <sup>13</sup>C NMR (101 MHz, Chloroform-*d*) δ 139.68, 135.92, 129.69, 129.03 (d), 127.20 (d, *J* = 7.7 Hz), 126.47, 124.31, 122.71, 120.30, 119.41, 110.65, 106.52 (d, *J* = 9.5 Hz), 62.18 (d, *J* = 6.7 Hz), 23.81, 22.38, 16.53 (d, *J* = 5.9 Hz). <sup>31</sup>P NMR (162 MHz, Chloroform-*d*) δ 27.87. HRMS (EI) *m/z*: calcd for: C<sub>19</sub>H<sub>22</sub>NO<sub>3</sub>P: 344.0950, found [M]<sup>+</sup>: 344.0949. Spectroscopic data are in accordance with the reported in the literature<sup>15</sup>.

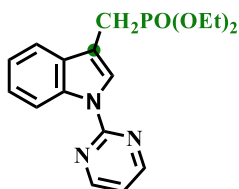

**diethyl ((1-(pyrimidin-2-yl)-1*H*-indol-3-yl)methyl)phosphonate (4q)** was prepared using 1-(pyrimidin-2-yl)-1*H*-indole and reagent I according to the general procedure as a colourless oil (13 mg, 19 %). <sup>1</sup>H NMR (400 MHz, Chloroform-*d*) δ 8.77 (d, *J* = 8.3 Hz, 1H), 8.67 (d, *J* = 4.9 Hz, 2H), 8.27 (d, *J* = 4.1 Hz, 1H), 7.64 (d, *J* = 7.7 Hz, 1H), 7.34 (t, *J* = 7.7 Hz, 1H), 7.26 (t, 1H), 7.01 (t, *J* = 4.7 Hz, 1H), 4.13 – 3.96 (m, 4H), 3.31 (d, *J* = 20.7 Hz, 2H), 1.24 (t, *J* = 7.0 Hz, 6H). <sup>13</sup>C NMR (101 MHz, Chloroform-*d*) δ 158.18, 157.68, 135.53, 130.99 (d, *J* = 5.8 Hz), 124.96 (d, *J* = 8.6 Hz), 124.04, 122.08, 119.22, 116.33, 116.14, 62.26 (d, *J* = 6.7 Hz), 24.09, 22.66, 16.49 (d, *J* = 5.8 Hz). <sup>31</sup>P NMR (162 MHz, Chloroform-*d*) δ 27.18. HRMS (EI) *m/z*: calcd for: C<sub>17</sub>H<sub>20</sub>N<sub>3</sub>O<sub>3</sub>P: 346.0711, found [M]<sup>+</sup>: 346.0708.

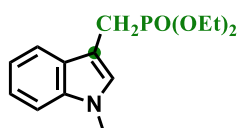

**diethyl ((1-methyl-1*H*-indol-3-yl)methyl)phosphonate (4r)** was prepared using 1-methyl-1*H*-indole and reagent I according to the general procedure as a brown oil (40 mg, 72 %). <sup>1</sup>H NMR (400 MHz, Chloroform-*d*) δ 7.60 (d, *J* = 7.9 Hz, 1H), 7.27 (d, *J* = 8.2 Hz, 1H), 7.21 (t, 1H), 7.10 (dd, *J* = 10.4, 5.2 Hz, 2H), 4.09 – 3.90 (m, 4H), 3.74 (s, 3H), 3.28 (d, *J* = 20.2 Hz, 2H), 1.22 (t, *J* = 7.1 Hz, 6H). <sup>13</sup>C NMR (101 MHz, Chloroform-*d*) δ 136.85, 128.22 (d, *J* = 7.0 Hz), 128.06 (d, *J* = 6.6 Hz), 121.76, 119.09 (d, *J* = 7.9 Hz), 109.29, 62.09 (d, *J* = 6.7 Hz), 32.83, 23.72, 22.29, 16.49 (d, *J* = 5.8 Hz). <sup>31</sup>P NMR (162 MHz, Chloroform-*d*) δ 28.31. HRMS (EI) *m/z*: calcd for: C<sub>14</sub>H<sub>20</sub>NO<sub>3</sub>P: 282.0241, found [M]<sup>+</sup>: 282.0240. Spectroscopic data are in accordance with the reported in the literature<sup>15</sup>.

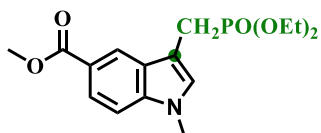

**methyl 3-((diethoxyphosphoryl)methyl)-1-methyl-1*H*-indole-5-carboxylate (4s)** was prepared using methyl 1-methyl-1*H*-indole-5-carboxylate and reagent I according to the general procedure as a brown oil (40 mg, 58 %). <sup>1</sup>H NMR (400 MHz, Chloroform-*d*) δ 8.36 (d, *J* = 1.7 Hz, 1H), 7.89 (dd, *J* = 8.7, 1.6 Hz, 1H), 7.25 (d, *J* = 8.7 Hz, 1H), 7.13 (d, *J* = 3.6 Hz, 1H), 4.08 – 3.94 (m, 4H), 3.90 (s, 3H), 3.74 (s, 3H), 3.27 (d, *J* = 20.3 Hz, 2H), 1.21 (t, *J* = 7.1 Hz, 6H). <sup>13</sup>C NMR (101 MHz, Chloroform-*d*) δ 168.25, 139.27, 129.62 (d, *J* = 7.5 Hz), 127.58 (d, *J* = 6.5 Hz), 123.18, 122.27, 121.21, 109.03, 105.60 (d, *J* = 9.0 Hz), 62.15 (d, *J* = 6.7 Hz), 51.87, 33.04, 29.76, 23.66, 22.22, 16.43 (d, *J* = 5.8 Hz). δ 27.65. HRMS (EI) *m/z*: calcd for: C<sub>16</sub>H<sub>22</sub>NO<sub>5</sub>P: 3340.0601, found [M]<sup>+</sup>: 340.0605.

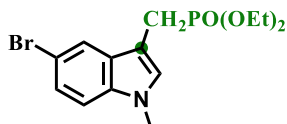

**diethyl ((5-bromo-1-methyl-1*H*-indol-3-yl)methyl)phosphonate (4t)** was prepared using 5-bromo-1-methyl-1*H*-indole and reagent I according to the general procedure as a colourless oil (26 mg, 36 %). <sup>1</sup>H NMR (400 MHz, Chloroform-*d*) δ 7.72 (d, *J* = 2.1 Hz, 1H), 7.26 (dd, *J* = 9.2, 1.6 Hz, 1H), 7.12 (dd, *J* = 8.8, 1.7 Hz, 1H), 7.06 (d, *J* = 3.4 Hz, 1H), 4.01-3.90 (m, 4H), 3.71 (s, 3H), 3.19 (d, *J* = 20.1 Hz, 2H), 1.26 – 1.18 (m, 6H). <sup>13</sup>C NMR (101 MHz, Chloroform-*d*) δ 135.55, 129.63 (d, *J* = 5.8 Hz), 129.41 (d, *J* = 7.6 Hz), 124.60, 121.84, 112.61, 110.84, 103.42 (d, *J* = 9.2 Hz), 62.15 (d, *J* = 6.9 Hz), 33.02, 29.77, 23.74, 22.31, 16.48 (d, *J* = 5.8 Hz). <sup>31</sup>P NMR (162 MHz, Chloroform-*d*) δ 27.72. HRMS (EI) *m/z*: calcd for: C<sub>14</sub>H<sub>19</sub>BrNO<sub>3</sub>P: 360.9200, found [M]<sup>+</sup>: 340.9201.

## 7. Functional Group Transformation.

### 7.1 Hydrolysis of products 3 or 4<sup>16</sup>.

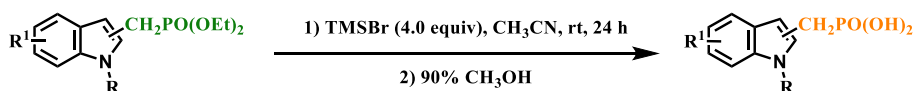

Trimethylsilylbromide (104 μL, 0.8 mmol, 4.0 equiv) was added dropwise to the phosphonate ester 3 or 4 (0.2 mmol, 1.0 equiv.) in CH<sub>3</sub>CN (2.0 mL) and the mixture stirred overnight at room temperature under N<sub>2</sub>. At the end of the reaction, removed the large excesses of bromotrimethylsilane and ACN by evaporation under low pressure. Added a mixture of methanol and water (9: 1, 10 mL) to the residue. Removed the solvents again and dry the solid product under vacuum to obtain the phosphonic acid.

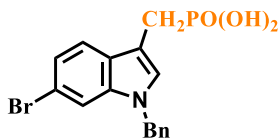

**((1-benzyl-6-bromo-1*H*-indol-3-yl)methyl)phosphonic acid (5n)** was prepared using diethyl ((1-benzyl-6-bromo-1*H*-indol-3-yl)methyl)phosphonate according to the general procedure as a brown solid (59 mg, 68 %). <sup>1</sup>H NMR (400 MHz, DMSO-*d*<sub>6</sub>) δ 7.65 (s, 1H), 7.56 (d, *J* = 8.5 Hz, 1H), 7.36 (d, *J* = 3.2 Hz, 1H), 7.34 – 7.15 (m, 5H), 7.12 (d, *J* = 8.4 Hz, 1H), 5.39 (s, 2H), 3.04 (d, *J* = 20.1 Hz, 2H). <sup>13</sup>C NMR (101 MHz, DMSO-*d*<sub>6</sub>) δ 138.56, 137.14, 129.18, 129.11, 127.95, 127.72 (d, *J* = 5.8 Hz), 127.59, 121.93, 114.65, 113.07, 107.29 (d, *J* = 8.7 Hz), 49.42, 25.92, 24.54. <sup>31</sup>P NMR (162 MHz, DMSO-*d*<sub>6</sub>) δ 22.93. HRMS (EI) *m/z*: calcd for: C<sub>16</sub>H<sub>15</sub>BrNO<sub>3</sub>P: 380.9104, found [M]<sup>+</sup>:

380.9107.

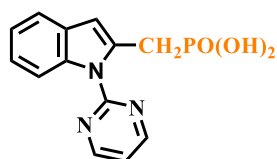

**((1-(pyrimidin-2-yl)-1H-indol-2-yl)methyl)phosphonic acid (5h)** was prepared using diethyl ((1-benzyl-6-bromo-1H-indol-3-yl)methyl)phosphonate according to the general procedure as a brown solid (48 mg, 83 %). <sup>1</sup>H NMR (400 MHz, DMSO-*d*<sub>6</sub>) δ 9.94 (s, 2H), 8.88 (s, 2H), 8.04 (d, *J* = 7.6 Hz, 1H), 7.51 (d, *J* = 6.7 Hz, 1H), 7.38 (s, 1H), 7.14 – 7.09 (m, 2H), 6.63 (s, 1H), 3.79 (d, *J* = 21.1 Hz, 2H). <sup>13</sup>C NMR (101 MHz, DMSO-*d*<sub>6</sub>) δ 159.26, 157.85, 136.99, 133.53 (d, *J* = 9.3 Hz), 128.88, 122.80, 120.20, 118.74, 113.80, 107.79 (d, *J* = 8.0 Hz), 29.60, 28.27. <sup>31</sup>P NMR (162 MHz, DMSO-*d*<sub>6</sub>) δ 20.66. HRMS (EI) *m/z*: calcd for: C<sub>13</sub>H<sub>12</sub>N<sub>3</sub>O<sub>3</sub>P: 289.9630, found [M]<sup>+</sup>: 289.9629.

7.2. Synthesis of diethyl (1-(1-benzyl-1H-indol-3-yl)-2-hydroxy-2-phenylethyl)phosphonate<sup>17</sup>.

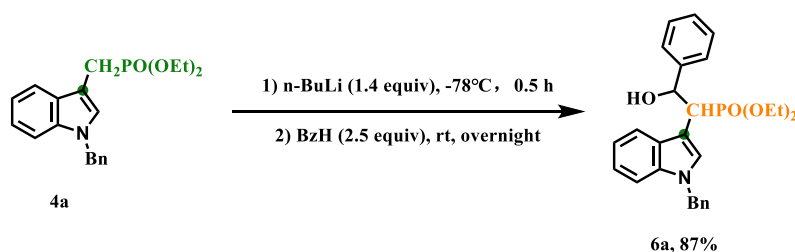

A solution of *n*-BuLi (2.5 M, 1.4 equiv.) in THF was added dropwise into a Schlenk tube equipped with a magnetic stir bar containing a solution of 4a (71.5 mg, 0.2 mmol) in dry THF (2 mL) at -78°C under N<sub>2</sub>. The solution was stirred at this temperature for 30 min until a bright yellow color appeared. Benzaldehyde (51 μL, 0.25 mmol) was then added and the cooling bath was removed. The reaction was continued at room temperature with stirring overnight. Then the solution was acidified by 2 M HCl, stirred for 30 minutes and extracted with CH<sub>2</sub>Cl<sub>2</sub> (3 x 25 mL). The resulting organic phase was then dried over Na<sub>2</sub>SO<sub>4</sub> and the solvent was removed under reduced pressure. The crude was purified via flash column chromatography on silica gel (Petroleum ether : Ethyl Acetate = 3:1) to get 6a as a colourless oil (80 mg, 87 %). **diethyl (1-(1-benzyl-1H-indol-3-yl)-2-hydroxy-2-phenylethyl)phosphonate (6a)** <sup>1</sup>H NMR (400 MHz, Chloroform-*d*) δ 7.57 (d, *J* = 2.8 Hz, 1H), 7.28 – 7.14 (m, 8H), 7.13 – 7.03 (m, 4H), 6.99 (dd, *J* = 7.1, 2.5 Hz, 2H), 6.94 (t, *J* = 7.4 Hz, 1H), 5.55 (dd, *J* = 7.7, 2.7 Hz, 1H), 5.30 (s, 2H), 4.37 – 4.25 (m, 1H), 4.24 – 4.05 (m, 2H), 3.85 – 3.68 (m, 2H), 3.42 – 3.27 (m, 1H), 1.36 (t, *J* = 7.1 Hz, 3H), 0.82 (t, *J* = 7.0 Hz, 3H). <sup>13</sup>C NMR (101 MHz, Chloroform-*d*) δ 141.40 (d, *J* = 14.6 Hz), 137.73, 135.80, 129.33 (d, *J* = 5.8 Hz), 129.05 (d, *J* = 7.2 Hz), 128.76, 127.79, 127.64, 127.17, 126.64, 126.13, 121.75, 119.35, 118.69, 109.63, 104.07 (d, *J* = 5.3 Hz), 72.06, 63.70 (d, *J* = 6.8 Hz), 62.02 (d, *J* = 7.4 Hz), 50.13, 43.18, 41.81, 16.55 (d, *J* = 5.8 Hz), 16.16 (d, *J* = 5.7 Hz). <sup>31</sup>P NMR (162 MHz, Chloroform-*d*) δ 28.42. HRMS (EI) *m/z*: calcd for: C<sub>27</sub>H<sub>30</sub>NO<sub>4</sub>P: 464.2164, found [M]<sup>+</sup>: 464.2161.

## 8. Mechanistic Investigations.

### 8.1 UV-vis absorption spectra.

UV-vis absorption spectra UV-visible absorption spectra were recorded on an UV-2700 spectrophotometer, equipped with a temperature control unit at 25 °C. The samples were measured in Starna Fluorometer Microquartz cuvettes (volume: 1.8 ml, path length: 10 mm) equipped with a PTFE-stopper. The spectra were acquired from 210 to 530 nm using 1.0 nm steps. All measurements were performed in MeCN at the following concentrations: N-Boc indole (3k) and reagent I (1/100 of the reaction concentration); fac-Ir(ppy)<sub>3</sub> (0.1 mM, 1/10 of the reaction concentration).

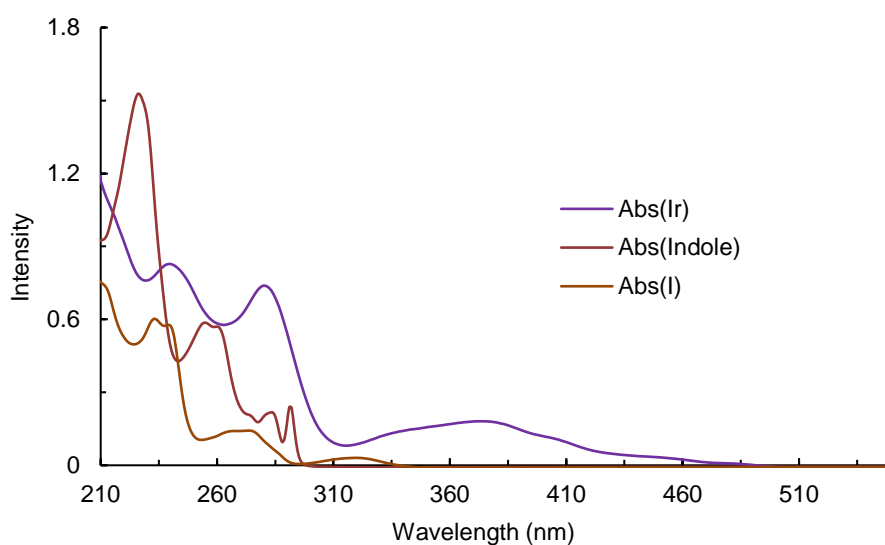

Figure S1. UV-vis absorption spectrum.

### 8.2 Stern-Volmer luminescence quenching experiments.

Fluorescence quenching studies were performed using a Hitachi F-4600 spectro fluorometer. In each experiment, fac-Ir(ppy)<sub>3</sub> and various concentrations of reagent I were combined in MeCN in Starna Fluorometer Microquartz cuvettes (volume: 1.8 ml, path length: 10 mm) equipped with a PTFE-stopper. The emission quenching of the fac-Ir(ppy)<sub>3</sub> was achieved using a concentration of 0.1 mM under excitation at 380 nm. The emission intensity was observed at 520 nm. Plots were constructed according to the Stern-Volmer equation  $I_0/I = 1 + k_{\text{qr}}\tau_0[Q]$ .

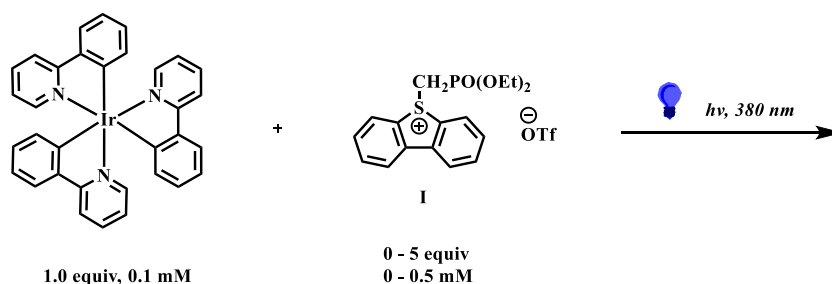

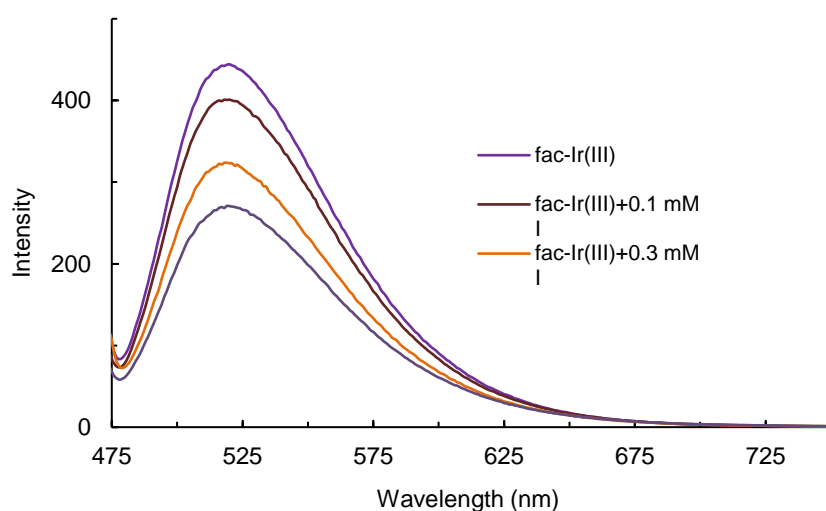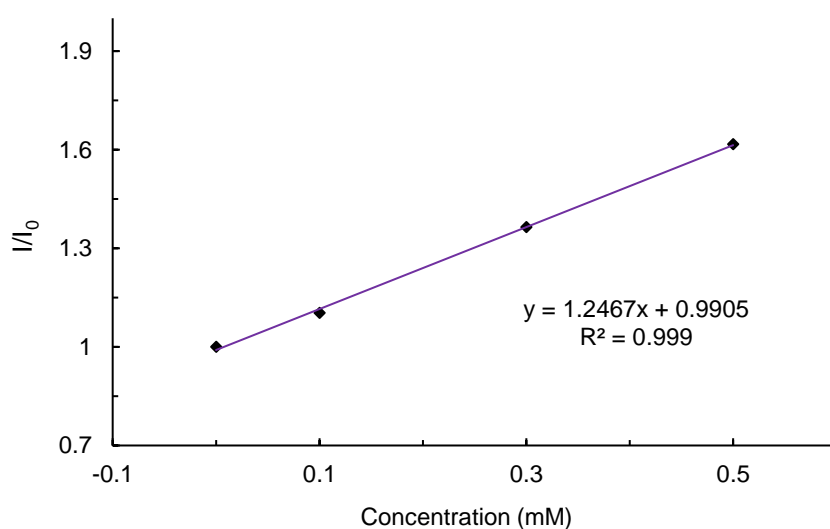

Figure S2. Stern-Volmer luminescence quenching experiments of reagent I.

### 8.3 Radical trap experiment.

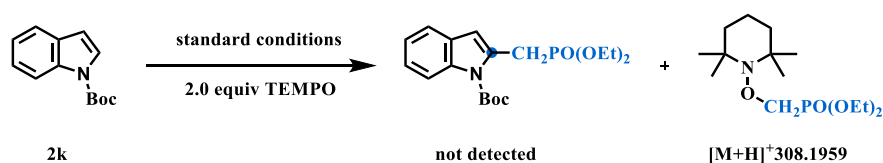

The mixture of indole 3k (0.2 mmol, 1.0 equiv.), reagent I (96.8 mg, 0.2 mmol, 1 equiv.), NaOAc (16.4 mg, 0.4 mmol, 2.0 equiv.), the photocatalyst fac-Ir(ppy)<sub>3</sub> (2 mg, 3 mol%) and 2, 2, 6, 6-tetramethylpiperidinyl-1-oxide (TEMPO, 62.4 mg, 0.40 mmol, 2.0 equiv.) in HOAc (2.0 mL) was stirred under irradiation of blue LEDs overnight at room temperature. Then another portion sulfonium salt (96.8 mg, 0.2 mmol, 1.0 equiv.) was added to the reaction solution and the mixture was stirred for 12-24 h under blue light. The progress of the reaction was monitored by TLC. After completion of the reaction, 10  $\mu$ L of n-dodecane was added as an internal standard and the reaction

mixture was diluted with EtOAc. The crude reaction mixture was diluted with EtOAc and filtered through a plug of silica then subjected to LC-HRMS analysis. HRMS (EI)  $m/z$ : calcd for:  $C_{14}H_{30}NO_4P$ : 308.1985, found  $[M]^+$ : 308.1959.

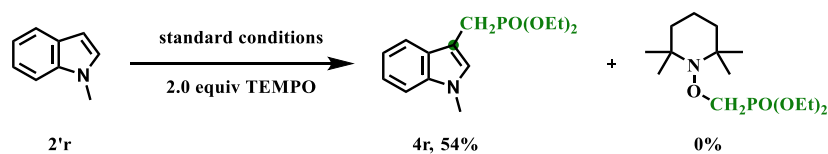

A mixture of indole **2'r** (0.2 mmol, 1.0 equiv.), reagent I (106.5 mg, 0.22 mmol, 1.1 equiv.),  $Cu(OTf)_2$  (7.2 mg, 10 mol %) and TEMPO (62.4 mg, 0.40 mmol, 2.0 equiv.) in DCM (2.0 mL) was stirred at 60 °C overnight. The course of the reaction was monitored with thin layer chromatography (TLC). The reaction mixture was then cooled to the room temperature and 10  $\mu$ L of *n*-dodecane was added as an internal standard and the reaction mixture was diluted with EtOAc. **4r** was obtained in 54 % yield.

#### 8.4 *In situ* $^1H$ -NMR experiments.

All experiments were carried out in NMR tubes. Two portions of the reagents I (24 mg, 0.05 mmol) in  $CD_2Cl_2$  were loaded into two NMR tubes separately and the  $^1H$ -NMR spectras were collected. Subsequently,  $Cu(OTf)_2$  (2 mg, 10 mol%) and  $ZnCl_2$  (0.6 mg, 10 mol%) were added into the above NMR tubes separately. Then the  $^1H$ -NMR spectras were collected.

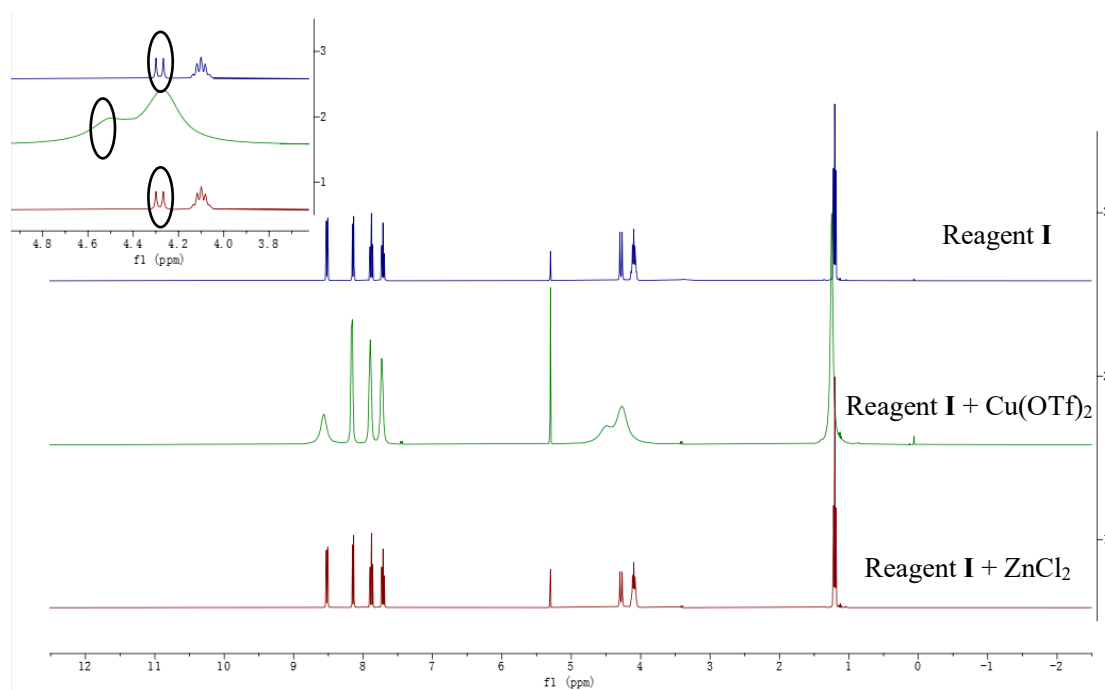

Figure S3. *In situ*  $^1H$ -NMR experiments.

## 9. X-Ray Crystal Structures.

### Crystal Structure of [C<sub>17</sub>H<sub>20</sub>O<sub>3</sub>PS][CF<sub>3</sub>SO<sub>3</sub>]

The low temperature (170±2°K) single-crystal X-ray experiments were performed on a Rigaku diffractometer with Cu K<sub>α</sub> radiation. Unit cell was obtained and refined by 13311 reflections with 3.8° < θ < 66.4°. No decay was observed in data collection. Raw intensities were corrected for Lorentz and polarization effects, and for absorption by empirical method. Direct phase determination yielded the positions of all non-hydrogen atoms. All non-hydrogen atoms were subjected to anisotropic refinement. All hydrogen atoms of carbons were generated geometrically with C-H bonds of 0.95-0.99 according to criteria described in the SHELXTL manual (Bruker, 1997). They were included in the refinement with U<sub>iso</sub>(H) = 1.2U<sub>eq</sub> or 1.5U<sub>eq</sub> (for methyl C) of their parent atoms. The final full-matrix least-square refinement on F<sup>2</sup> converged with R1 = 0.0613 and wR2 = 0.1643 for 3476 observed reflections [I ≥ 2σ(I)]. The final difference electron density map shows no features. Details of crystal parameters, data collection and structure refinement are given in Table 1.

Data collection was controlled by CrysAlisPro, Agilent Technologies, Version 1.171.36.32 (Oxford, 2013). Computations were performed using the SHELXTL NT ver. 5.10 program package (Bruker, 1997) on an IBM PC 586 computer. Analytic expressions of atomic scattering factors were employed, and anomalous dispersion corrections were incorporated (*International Tables for X-ray Crystallography*, 1989). Crystal drawings were produced with XP (Bruker, 1997).

### References

- Bruker. (1997) SHELXTL. Structure Determination Programs, Version 5.10, Bruker AXS Inc., 6300 Enterprise Lane, Madison, WI 53719-1173, USA.
- International Tables for X-ray Crystallography*: (1989) Vol. C (Kluwer Academic Publishers, Dordrecht) Tables 4.2.6.8 and 6.1.1.4.
- Oxford. (2013) CrysAlisPro, Agilent Technologies, Version 1.171.36.32, Oxford Diffraction Ltd., 68 Milton Park, Abingdon, Oxfordshire, OX14 4RX, UK.



Table S2. Details of Data Collection, Processing and Structure Refinement

| Sample code                                                                            | Reagent I                                                                             |                             |                                        |
|----------------------------------------------------------------------------------------|---------------------------------------------------------------------------------------|-----------------------------|----------------------------------------|
| Molecular formula                                                                      | [C <sub>17</sub> H <sub>20</sub> O <sub>3</sub> PS][CF <sub>3</sub> SO <sub>3</sub> ] |                             |                                        |
| Molecular weight                                                                       | 484.43                                                                                |                             |                                        |
| Color and habit                                                                        | colorless needle                                                                      |                             |                                        |
| Crystal size                                                                           | 0.05 × 0.20 × 0.20 mm                                                                 |                             |                                        |
| Crystal system                                                                         | monoclinic                                                                            |                             |                                        |
| Space group                                                                            | P2 <sub>1</sub> /n (No. 14)                                                           |                             |                                        |
| Unit cell parameters                                                                   | $a = 11.3092(2)$                                                                      | $\alpha = 90.00^\circ$      |                                        |
|                                                                                        | $b = 10.0133(2)$                                                                      | $\beta = 90.7760(10)^\circ$ |                                        |
|                                                                                        | $c = 18.3326(3)$                                                                      | $\gamma = 90.00^\circ$      |                                        |
|                                                                                        | $V = 2075.84(6)$                                                                      | $Z = 4$                     | $F(000) = 1000$                        |
| Density (calcd)                                                                        | 1.550 g/cm <sup>3</sup>                                                               |                             |                                        |
| Diffractometer                                                                         | XtaLAB AFC11 (RINC): quarter-chi single                                               |                             |                                        |
| Radiation                                                                              | Cu K $\alpha$ , $\lambda = 1.54178$                                                   |                             |                                        |
| Temperature                                                                            | 170±2K                                                                                |                             |                                        |
| Scan type                                                                              | $\omega$ -scan                                                                        |                             |                                        |
| Data collection range                                                                  | $-13 < h < 13, -10 < k < 11, -21 < l < 21; \theta_{\max} = 66.6^\circ$                |                             |                                        |
| Reflections measured                                                                   | Total: 16158                                                                          | Unique ( $n$ ): 3536        | Observed [ $I \geq 2\sigma(I)$ ]: 3476 |
| Absorption coefficient                                                                 | 3.617 mm <sup>-1</sup>                                                                |                             |                                        |
| Minimum and maximum transmission                                                       | 0.064, 1.000                                                                          |                             |                                        |
| No. of variables, $p$                                                                  | 273                                                                                   |                             |                                        |
| Weighting scheme                                                                       | $w = \frac{1}{\sigma^2(F_o^2) + (0.0983P)^2 + 3.4060P}$                               |                             | $P = (F_o^2 + 2F_c^2)/3$               |
| $R1 = \frac{\sum   F_o  -  F_c  }{\sum  F_o }$ (for all reflections)                   | 0.0618                                                                                | 0.0613 (for observed data)  |                                        |
| $wR2 = \sqrt{\frac{\sum [w(F_o^2 - F_c^2)^2]}{\sum w(F_o^2)^2}}$ (for all reflections) | 0.1647                                                                                | 0.1643 (for observed data)  |                                        |
| Goof = $S = \sqrt{\frac{\sum [w(F_o^2 - F_c^2)^2]}{n - p}}$                            | 1.051                                                                                 |                             |                                        |
| Largest and mean $\Delta/\sigma$                                                       | 0.000, 0.000                                                                          |                             |                                        |
| Residual extrema in final difference map                                               | -0.504 to 0.658 e <sup>-3</sup>                                                       |                             |                                        |

Table S3. Atomic coordinates and equivalent isotropic temperature factors\* ( $\text{\AA}^2$ )

| Atoms | <i>x</i>    | <i>y</i>    | <i>z</i>     | $U_{eq.}$  |
|-------|-------------|-------------|--------------|------------|
| S(1)  | 0.10736(6)  | -0.00005(6) | 0.13675(3)   | 0.0229(2)  |
| S(2)  | 0.62833(9)  | 0.63470(10) | 0.16870(5)   | 0.0491(3)  |
| P(1)  | 0.29739(6)  | 0.20403(7)  | 0.19818(4)   | 0.0220(2)  |
| F(1)  | 0.5570(3)   | 0.4096(3)   | 0.2226(2)    | 0.0854(9)  |
| F(2)  | 0.7149(4)   | 0.3944(4)   | 0.1653(3)    | 0.140(2)   |
| F(3)  | 0.7129(4)   | 0.4812(5)   | 0.2698(2)    | 0.1307(17) |
| O(1)  | 0.3091(2)   | 0.2895(2)   | 0.26271(12)  | 0.0348(5)  |
| O(2)  | 0.26454(17) | 0.2722(2)   | 0.12451(11)  | 0.0290(5)  |
| O(3)  | 0.40960(18) | 0.1188(2)   | 0.18078(11)  | 0.0308(5)  |
| O(4)  | 0.5623(7)   | 0.6087(5)   | 0.1055(3)    | 0.155(3)   |
| O(5)  | 0.5645(4)   | 0.7013(4)   | 0.2235(2)    | 0.0934(14) |
| O(6)  | 0.7422(4)   | 0.6861(4)   | 0.1571(3)    | 0.1186(19) |
| C(1)  | 0.0487(2)   | 0.1253(3)   | 0.07807(15)  | 0.0243(6)  |
| C(2)  | -0.0479(3)  | 0.2053(3)   | 0.09371(17)  | 0.0300(6)  |
| C(3)  | -0.0827(3)  | 0.2960(3)   | 0.04057(18)  | 0.0361(7)  |
| C(4)  | -0.0242(3)  | 0.3029(3)   | -0.02557(18) | 0.0373(7)  |
| C(5)  | 0.0717(3)   | 0.2200(3)   | -0.04052(16) | 0.0307(7)  |
| C(6)  | 0.1089(2)   | 0.1296(3)   | 0.01226(15)  | 0.0247(6)  |
| C(7)  | 0.2080(2)   | 0.0352(3)   | 0.01025(15)  | 0.0250(6)  |
| C(8)  | 0.2210(2)   | -0.0399(3)  | 0.07386(14)  | 0.0238(6)  |
| C(9)  | 0.3065(3)   | -0.1368(3)  | 0.08432(16)  | 0.0291(6)  |
| C(10) | 0.3843(3)   | -0.1577(3)  | 0.02755(18)  | 0.0354(7)  |
| C(11) | 0.3745(3)   | -0.0833(3)  | -0.03645(17) | 0.0360(7)  |
| C(12) | 0.2877(3)   | 0.0123(3)   | -0.04608(16) | 0.0311(7)  |
| C(13) | 0.1745(2)   | 0.0923(3)   | 0.21191(14)  | 0.0238(6)  |
| C(14) | 0.3483(3)   | 0.3429(4)   | 0.0777(2)    | 0.0394(8)  |
| C(15) | 0.2968(5)   | 0.4715(4)   | 0.0549(3)    | 0.0634(12) |
| C(16) | 0.5015(3)   | 0.0918(5)   | 0.2369(2)    | 0.0532(10) |
| C(17) | 0.4661(5)   | -0.0128(4)  | 0.2885(2)    | 0.0604(11) |
| C(18) | 0.6550(3)   | 0.4715(5)   | 0.2055(2)    | 0.0524(10) |

\* $U_{eq.}$  defined as one third of the trace of the orthogonalized U tensor.

Table S4. Bond lengths (Å) and bond angles (°)

|                 |            |                   |            |
|-----------------|------------|-------------------|------------|
| S(1)-C(1)       | 1.776(3)   | C(1)-C(2)         | 1.387(4)   |
| S(1)-C(8)       | 1.784(3)   | C(1)-C(6)         | 1.394(4)   |
| S(1)-C(13)      | 1.817(3)   | C(2)-C(3)         | 1.385(4)   |
| S(2)-O(4)       | 1.394(5)   | C(3)-C(4)         | 1.391(5)   |
| S(2)-O(6)       | 1.406(4)   | C(4)-C(5)         | 1.396(5)   |
| S(2)-O(5)       | 1.412(3)   | C(5)-C(6)         | 1.386(4)   |
| S(2)-C(18)      | 1.792(4)   | C(6)-C(7)         | 1.467(4)   |
| P(1)-O(1)       | 1.465(2)   | C(7)-C(8)         | 1.394(4)   |
| P(1)-O(2)       | 1.554(2)   | C(7)-C(12)        | 1.398(4)   |
| P(1)-O(3)       | 1.566(2)   | C(8)-C(9)         | 1.381(4)   |
| P(1)-C(13)      | 1.804(3)   | C(9)-C(10)        | 1.388(4)   |
| F(1)-C(18)      | 1.311(5)   | C(10)-C(11)       | 1.393(5)   |
| F(2)-C(18)      | 1.270(5)   | C(11)-C(12)       | 1.381(5)   |
| F(3)-C(18)      | 1.343(5)   | C(14)-C(15)       | 1.472(5)   |
| O(2)-C(14)      | 1.469(4)   | C(16)-C(17)       | 1.470(6)   |
| O(3)-C(16)      | 1.478(4)   |                   |            |
| C(1)-S(1)-C(8)  | 91.90(13)  | C(6)-C(5)-C(4)    | 118.8(3)   |
| C(1)-S(1)-C(13) | 104.40(13) | C(5)-C(6)-C(1)    | 118.5(3)   |
| C(8)-S(1)-C(13) | 107.84(13) | C(5)-C(6)-C(7)    | 128.9(3)   |
| O(4)-S(2)-O(6)  | 115.1(4)   | C(1)-C(6)-C(7)    | 112.6(2)   |
| O(4)-S(2)-O(5)  | 114.0(4)   | C(8)-C(7)-C(12)   | 117.9(3)   |
| O(6)-S(2)-O(5)  | 114.4(3)   | C(8)-C(7)-C(6)    | 113.5(2)   |
| O(4)-S(2)-C(18) | 103.2(3)   | C(12)-C(7)-C(6)   | 128.6(3)   |
| O(6)-S(2)-C(18) | 104.0(2)   | C(9)-C(8)-C(7)    | 124.1(3)   |
| O(5)-S(2)-C(18) | 104.3(2)   | C(9)-C(8)-S(1)    | 125.2(2)   |
| O(1)-P(1)-O(2)  | 117.61(13) | C(7)-C(8)-S(1)    | 110.6(2)   |
| O(1)-P(1)-O(3)  | 114.72(13) | C(8)-C(9)-C(10)   | 116.9(3)   |
| O(2)-P(1)-O(3)  | 104.32(11) | C(9)-C(10)-C(11)  | 120.4(3)   |
| O(1)-P(1)-C(13) | 108.13(13) | C(12)-C(11)-C(10) | 121.8(3)   |
| O(2)-P(1)-C(13) | 102.60(12) | C(11)-C(12)-C(7)  | 118.9(3)   |
| O(3)-P(1)-C(13) | 108.55(13) | P(1)-C(13)-S(1)   | 121.63(15) |
| C(14)-O(2)-P(1) | 124.85(19) | O(2)-C(14)-C(15)  | 109.4(3)   |
| C(16)-O(3)-P(1) | 121.5(2)   | C(17)-C(16)-O(3)  | 112.5(3)   |
| C(2)-C(1)-C(6)  | 123.8(3)   | F(2)-C(18)-F(1)   | 108.1(4)   |
| C(2)-C(1)-S(1)  | 124.9(2)   | F(2)-C(18)-F(3)   | 107.2(5)   |
| C(6)-C(1)-S(1)  | 111.3(2)   | F(1)-C(18)-F(3)   | 103.2(4)   |
| C(3)-C(2)-C(1)  | 116.8(3)   | F(2)-C(18)-S(2)   | 115.1(3)   |
| C(2)-C(3)-C(4)  | 120.8(3)   | F(1)-C(18)-S(2)   | 112.5(3)   |
| C(3)-C(4)-C(5)  | 121.4(3)   | F(3)-C(18)-S(2)   | 110.0(4)   |

Table S5. Anisotropic thermal parameters\* ( $\text{\AA}^2$ )

| Atoms | $U_{11}$   | $U_{22}$   | $U_{33}$   | $U_{23}$    | $U_{13}$    | $U_{12}$    |
|-------|------------|------------|------------|-------------|-------------|-------------|
| S(1)  | 0.0294(4)  | 0.0201(4)  | 0.0193(4)  | -0.0006(2)  | 0.0028(3)   | -0.0031(2)  |
| S(2)  | 0.0555(6)  | 0.0504(6)  | 0.0417(5)  | 0.0037(4)   | 0.0133(4)   | -0.0018(4)  |
| P(1)  | 0.0268(4)  | 0.0183(4)  | 0.0209(4)  | -0.0007(2)  | -0.0003(3)  | 0.0006(2)   |
| F(1)  | 0.0715(17) | 0.0577(16) | 0.128(3)   | 0.0095(17)  | 0.0318(17)  | -0.0161(14) |
| F(2)  | 0.171(4)   | 0.082(2)   | 0.170(4)   | 0.028(3)    | 0.117(3)    | 0.060(3)    |
| F(3)  | 0.147(4)   | 0.143(4)   | 0.100(3)   | 0.049(3)    | -0.066(3)   | -0.021(3)   |
| O(1)  | 0.0414(12) | 0.0304(12) | 0.0324(11) | -0.0119(9)  | 0.0002(9)   | -0.0047(9)  |
| O(2)  | 0.0276(10) | 0.0286(11) | 0.0307(11) | 0.0106(8)   | -0.0020(8)  | -0.0041(8)  |
| O(3)  | 0.0311(11) | 0.0313(11) | 0.0299(11) | 0.0026(8)   | 0.0032(8)   | 0.0085(8)   |
| O(4)  | 0.252(7)   | 0.102(3)   | 0.106(4)   | 0.013(3)    | -0.108(4)   | 0.026(4)    |
| O(5)  | 0.107(3)   | 0.064(2)   | 0.111(3)   | -0.018(2)   | 0.069(2)    | -0.014(2)   |
| O(6)  | 0.092(3)   | 0.087(3)   | 0.180(5)   | 0.030(3)    | 0.085(3)    | -0.015(2)   |
| C(1)  | 0.0277(14) | 0.0232(14) | 0.0218(13) | 0.0006(10)  | -0.0016(11) | -0.0032(11) |
| C(2)  | 0.0303(15) | 0.0299(16) | 0.0299(15) | -0.0034(12) | -0.0003(12) | -0.0006(12) |
| C(3)  | 0.0314(15) | 0.0393(18) | 0.0373(17) | -0.0017(14) | -0.0038(13) | 0.0058(13)  |
| C(4)  | 0.0413(17) | 0.0363(18) | 0.0342(17) | 0.0081(13)  | -0.0090(14) | 0.0016(14)  |
| C(5)  | 0.0350(15) | 0.0330(16) | 0.0240(14) | 0.0034(12)  | -0.0031(12) | -0.0041(12) |
| C(6)  | 0.0279(14) | 0.0246(14) | 0.0215(13) | -0.0028(11) | -0.0012(11) | -0.0069(11) |
| C(7)  | 0.0299(14) | 0.0238(14) | 0.0213(13) | -0.0031(11) | -0.0002(11) | -0.0056(11) |
| C(8)  | 0.0301(14) | 0.0212(13) | 0.0201(13) | -0.0042(10) | 0.0052(10)  | -0.0033(11) |
| C(9)  | 0.0391(16) | 0.0219(14) | 0.0264(14) | -0.0007(11) | 0.0025(12)  | -0.0006(12) |
| C(10) | 0.0371(16) | 0.0304(16) | 0.0387(17) | -0.0046(13) | 0.0054(13)  | 0.0036(13)  |
| C(11) | 0.0379(16) | 0.0409(18) | 0.0294(15) | -0.0058(13) | 0.0118(13)  | 0.0000(14)  |
| C(12) | 0.0372(16) | 0.0355(17) | 0.0207(14) | -0.0008(11) | 0.0046(12)  | -0.0061(12) |
| C(13) | 0.0338(14) | 0.0207(13) | 0.0170(12) | -0.0014(10) | 0.0026(10)  | -0.0020(11) |
| C(14) | 0.0354(16) | 0.0397(18) | 0.0433(18) | 0.0167(15)  | 0.0063(14)  | -0.0019(14) |
| C(15) | 0.081(3)   | 0.039(2)   | 0.070(3)   | 0.026(2)    | 0.015(2)    | 0.003(2)    |
| C(16) | 0.0355(17) | 0.068(3)   | 0.057(2)   | 0.026(2)    | -0.0013(16) | 0.0084(17)  |
| C(17) | 0.081(3)   | 0.051(2)   | 0.049(2)   | 0.0149(18)  | -0.011(2)   | 0.002(2)    |
| C(18) | 0.0367(18) | 0.062(2)   | 0.059(2)   | 0.009(2)    | 0.0056(17)  | 0.0008(17)  |

\*The exponent takes the form:  $-2\pi^2 \sum \sum U_{ij} h_i h_j \mathbf{a}_i^* \mathbf{a}_j^*$

Table S6. Coordinates and isotropic temperature factors\* ( $\text{\AA}^2$ ) for H atoms

| Atoms  | <i>x</i> | <i>y</i> | <i>z</i> | $U_{eq.}$ |
|--------|----------|----------|----------|-----------|
| H(2)   | -0.0881  | 0.1982   | 0.1387   | 0.036     |
| H(3)   | -0.1473  | 0.3541   | 0.0494   | 0.043     |
| H(4)   | -0.0500  | 0.3655   | -0.0613  | 0.045     |
| H(5)   | 0.1107   | 0.2254   | -0.0860  | 0.037     |
| H(9)   | 0.3118   | -0.1867  | 0.1283   | 0.035     |
| H(10)  | 0.4447   | -0.2232  | 0.0324   | 0.042     |
| H(11)  | 0.4290   | -0.0988  | -0.0745  | 0.043     |
| H(12)  | 0.2821   | 0.0616   | -0.0902  | 0.037     |
| H(13A) | 0.1109   | 0.1454   | 0.2345   | 0.029     |
| H(13B) | 0.2005   | 0.0257   | 0.2487   | 0.029     |
| H(14A) | 0.3655   | 0.2880   | 0.0342   | 0.047     |
| H(14B) | 0.4234   | 0.3583   | 0.1047   | 0.047     |
| H(15A) | 0.2185   | 0.4564   | 0.0328   | 0.095     |
| H(15B) | 0.3483   | 0.5141   | 0.0191   | 0.095     |
| H(15C) | 0.2892   | 0.5298   | 0.0975   | 0.095     |
| H(16A) | 0.5752   | 0.0640   | 0.2127   | 0.064     |
| H(16B) | 0.5184   | 0.1751   | 0.2642   | 0.064     |
| H(17A) | 0.3944   | 0.0153   | 0.3137   | 0.091     |
| H(17B) | 0.5299   | -0.0274  | 0.3243   | 0.091     |
| H(17C) | 0.4504   | -0.0959  | 0.2619   | 0.091     |

\*The exponent takes the form:  $-8\pi^2 U \sin^2\theta/\lambda^2$

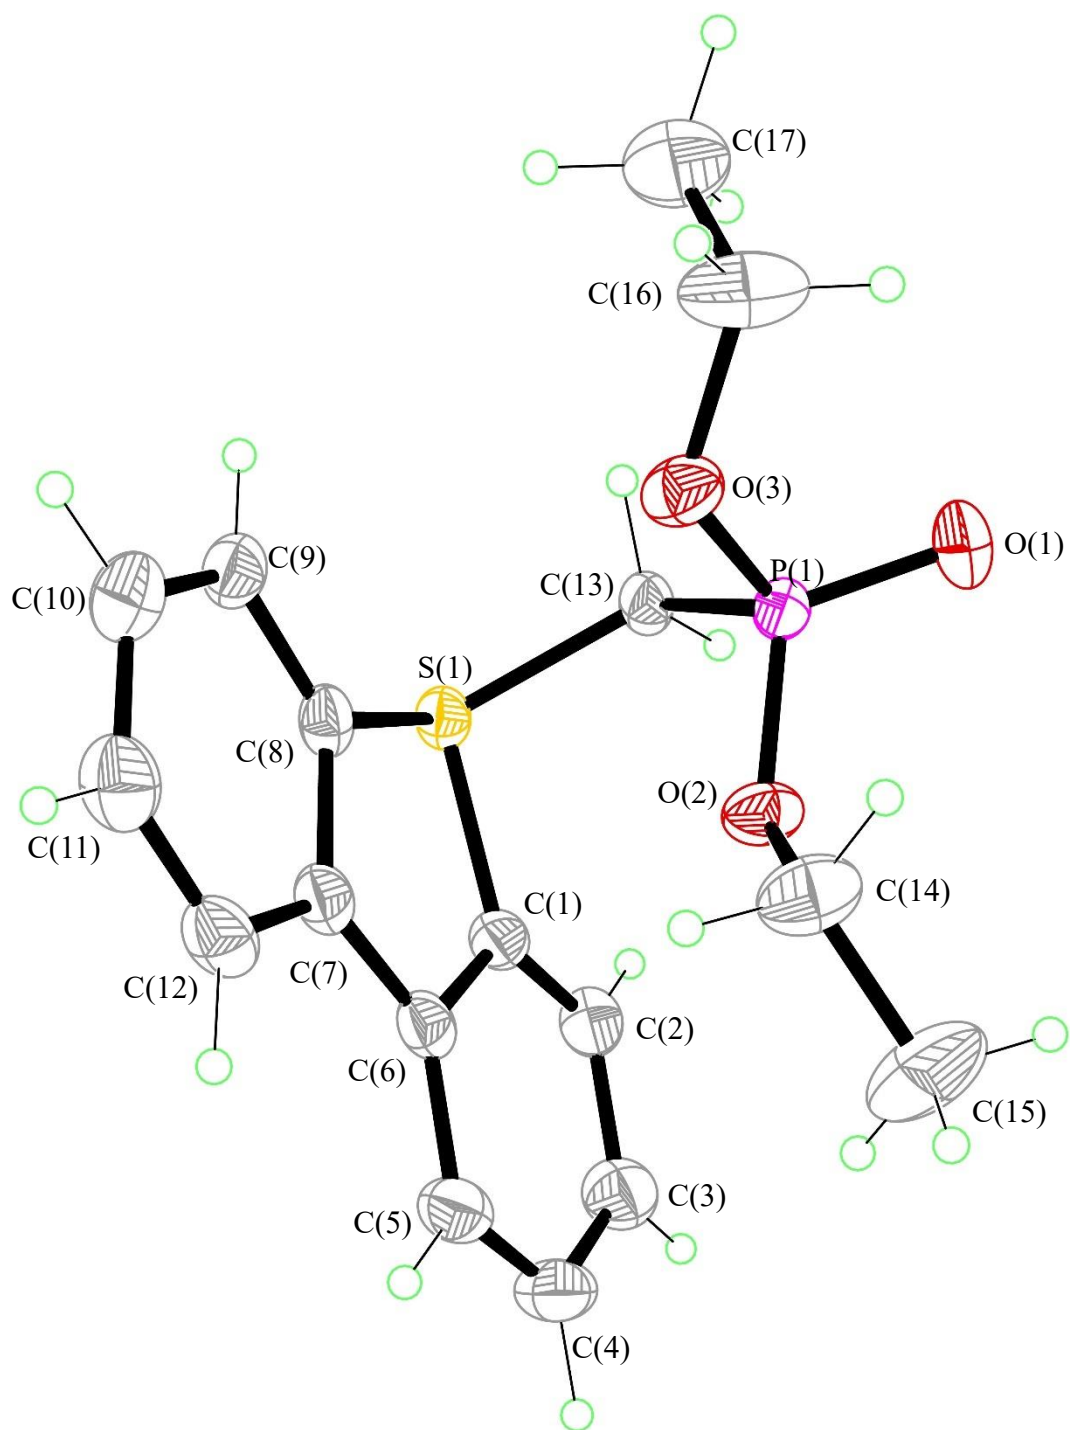

Figure S4 ORTEP drawing of  $[C_{16}H_{20}O_3PS]^+$  with 50% probability ellipsoids, showing the atomic numbering scheme.

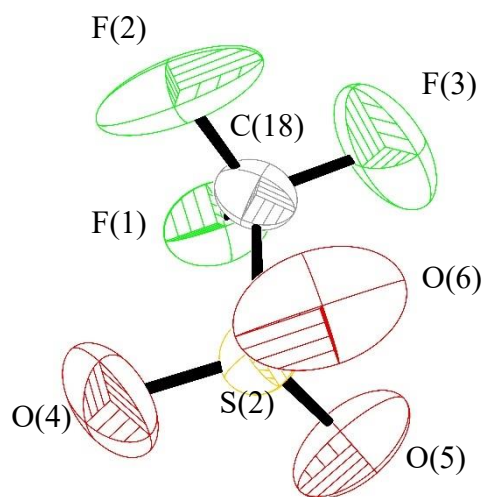

Figure S5 ORTEP drawing of [CF<sub>3</sub>SO<sub>3</sub>]<sup>-</sup> with 50% probability ellipsoids, showing the atomic numbering scheme.

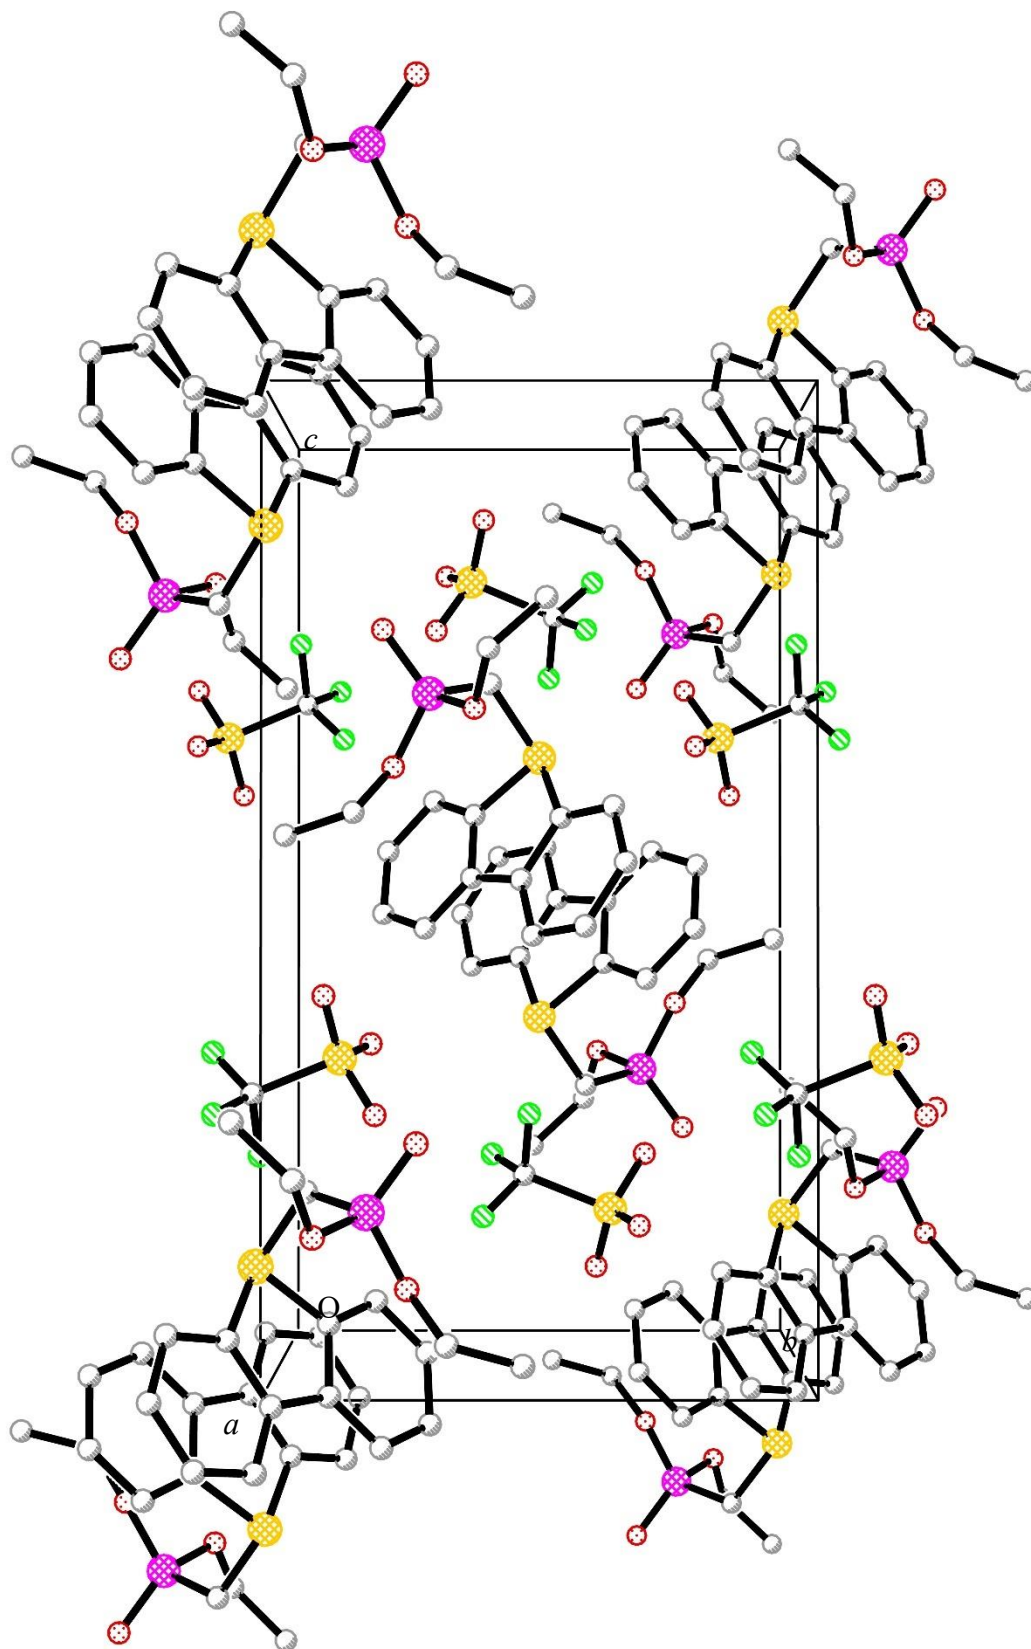

Figure S6 A packing view along the *a* direction



## Crystal Structure of C<sub>20</sub>H<sub>23</sub>BrNO<sub>3</sub>P

The low temperature (100±2°K) single-crystal X-ray experiments were performed on a Rigaku diffractometer with Cu K<sub>α</sub> radiation. Unit cell was obtained and refined by 14895 reflections with 4.1° < θ < 73.8°. No decay was observed in data collection. Raw intensities were corrected for Lorentz and polarization effects, and for absorption by empirical method. Direct phase determination yielded the positions of all non-hydrogen atoms. All non-hydrogen atoms were subjected to anisotropic refinement. All hydrogen atoms of carbons were generated geometrically with C-H bonds of 0.95-0.99 according to criteria described in the SHELXTL manual (Bruker, 1997). They were included in the refinement with U<sub>iso</sub>(H) = 1.2U<sub>eq</sub> or 1.5U<sub>eq</sub> (for methyl C) of their parent atoms. The final full-matrix least-square refinement on F<sup>2</sup> converged with R1 = 0.0339 and wR2 = 0.0914 for 3696 observed reflections [I ≥ 2σ(I)]. The final difference electron density map shows no features. Details of crystal parameters, data collection and structure refinement are given in Table 1.

Data collection was controlled by CrysAlisPro, Agilent Technologies, Version 1.171.36.32 (Oxford, 2013). Computations were performed using the SHELXTL NT ver. 5.10 program package (Bruker, 1997) on an IBM PC 586 computer. Analytic expressions of atomic scattering factors were employed, and anomalous dispersion corrections were incorporated (*International Tables for X-ray Crystallography*, 1989). Crystal drawings were produced with XP (Bruker, 1997).

### References

- Bruker. (1997) SHELXTL. Structure Determination Programs, Version 5.10, Bruker AXS Inc., 6300 Enterprise Lane, Madison, WI 53719-1173, USA.
- International Tables for X-ray Crystallography*: (1989) Vol. C (Kluwer Academic Publishers, Dordrecht) Tables 4.2.6.8 and 6.1.1.4.
- Oxford. (2013) CrysAlisPro, Agilent Technologies, Version 1.171.36.32, Oxford Diffraction Ltd., 68 Milton Park, Abingdon, Oxfordshire, OX14 4RX, UK.

Table S7. Details of Data Collection, Processing and Structure Refinement

|                                                                                        |                                                                        |                                                             |
|----------------------------------------------------------------------------------------|------------------------------------------------------------------------|-------------------------------------------------------------|
| Sample code                                                                            | <b>4n</b>                                                              |                                                             |
| Molecular formula                                                                      | C <sub>20</sub> H <sub>23</sub> BrNO <sub>3</sub> P                    |                                                             |
| Molecular weight                                                                       | 436.27                                                                 |                                                             |
| Color and habit                                                                        | colorless plate                                                        |                                                             |
| Crystal size                                                                           | 0.03 × 0.20 × 0.30 mm                                                  |                                                             |
| Crystal system                                                                         | triclinic                                                              |                                                             |
| Space group                                                                            | $P\bar{1}$ (No. 2)                                                     |                                                             |
| Unit cell parameters                                                                   | $a = 9.23480(10)$                                                      | $\alpha = 108.8050(10)^\circ$                               |
|                                                                                        | $b = 10.7943(2)$                                                       | $\beta = 95.4870(10)^\circ$                                 |
|                                                                                        | $c = 11.6518(2)$                                                       | $\gamma = 113.088(2)^\circ$                                 |
|                                                                                        | $V = 987.00(3) \text{ \AA}^3$                                          | $Z = 2 \quad F(000) = 448$                                  |
| Density (calcd)                                                                        | 1.481 g/cm <sup>3</sup>                                                |                                                             |
| Diffractometer                                                                         | ROD, Synergy Custom system, HyPix-Arc 150                              |                                                             |
| Radiation                                                                              | Cu K $\alpha$ , $\lambda = 1.54178$                                    |                                                             |
| Temperature                                                                            | 100±2K                                                                 |                                                             |
| Scan type                                                                              | $\omega$ -scan                                                         |                                                             |
| Data collection range                                                                  | $-11 < h < 11, -13 < k < 13, -13 < l < 14; \theta_{\max} = 73.9^\circ$ |                                                             |
| Reflections measured                                                                   | Total: 17978                                                           | Unique ( $n$ ): 3776 Observed [ $I \geq 2\sigma(I)$ ]: 3696 |
| Absorption coefficient                                                                 | 3.799 mm <sup>-1</sup>                                                 |                                                             |
| Minimum and maximum transmission                                                       | 0.571, 1.000                                                           |                                                             |
| No. of variables, $p$                                                                  | 237                                                                    |                                                             |
| Weighting scheme                                                                       | $w = \frac{1}{\sigma^2(F_o^2) + (0.0499P)^2 + 0.8846P}$                | $P = (F_o^2 + 2F_c^2)/3$                                    |
| $R1 = \frac{\sum   F_o  -  F_c  }{\sum  F_o }$ (for all reflections)                   | 0.0343                                                                 | 0.0339 (for observed data)                                  |
| $wR2 = \sqrt{\frac{\sum [w(F_o^2 - F_c^2)^2]}{\sum w(F_o^2)^2}}$ (for all reflections) | 0.0918                                                                 | 0.0914 (for observed data)                                  |
| Goof = $S = \sqrt{\frac{\sum [w(F_o^2 - F_c^2)^2]}{n - p}}$                            | 1.070                                                                  |                                                             |
| Largest and mean $\Delta/\sigma$                                                       | 0.000, 0.000                                                           |                                                             |
| Residual extrema in final difference map                                               | -0.778 to 0.544 e <sup>-3</sup>                                        |                                                             |

Table S8. Atomic coordinates and equivalent isotropic temperature factors\* ( $\text{\AA}^2$ )

| Atoms | <i>x</i>    | <i>y</i>    | <i>z</i>    | $U_{eq.}$   |
|-------|-------------|-------------|-------------|-------------|
| Br(1) | -0.06235(3) | 0.03115(2)  | 0.20883(2)  | 0.02766(10) |
| P(1)  | 0.86751(7)  | 0.46121(6)  | 0.25932(5)  | 0.02057(13) |
| O(1)  | 0.72984(19) | 0.43877(18) | 0.16717(14) | 0.0263(3)   |
| O(2)  | 1.00922(19) | 0.44041(18) | 0.20145(14) | 0.0262(3)   |
| O(3)  | 0.96259(19) | 0.61879(16) | 0.36789(14) | 0.0236(3)   |
| N(1)  | 0.5211(2)   | 0.37227(19) | 0.53589(16) | 0.0199(4)   |
| C(1)  | 0.6771(3)   | 0.4042(2)   | 0.5226(2)   | 0.0207(4)   |
| C(2)  | 0.6736(3)   | 0.3403(2)   | 0.3992(2)   | 0.0207(4)   |
| C(3)  | 0.5056(3)   | 0.2631(2)   | 0.3315(2)   | 0.0197(4)   |
| C(4)  | 0.4243(3)   | 0.1785(2)   | 0.2042(2)   | 0.0213(4)   |
| C(5)  | 0.2565(3)   | 0.1129(2)   | 0.1691(2)   | 0.0241(4)   |
| C(6)  | 0.1694(3)   | 0.1333(2)   | 0.2604(2)   | 0.0234(4)   |
| C(7)  | 0.2437(3)   | 0.2194(2)   | 0.3862(2)   | 0.0206(4)   |
| C(8)  | 0.4138(3)   | 0.2834(2)   | 0.41995(19) | 0.0199(4)   |
| C(9)  | 0.8162(3)   | 0.3451(2)   | 0.3452(2)   | 0.0221(4)   |
| C(10) | 0.9703(3)   | 0.3381(3)   | 0.0720(2)   | 0.0305(5)   |
| C(11) | 1.1285(3)   | 0.3587(3)   | 0.0378(2)   | 0.0357(6)   |
| C(12) | 1.0314(3)   | 0.7454(3)   | 0.3331(2)   | 0.0318(5)   |
| C(13) | 1.1403(3)   | 0.8770(3)   | 0.4487(2)   | 0.0329(5)   |
| C(14) | 0.4793(3)   | 0.4100(2)   | 0.65550(19) | 0.0226(4)   |
| C(15) | 0.4776(3)   | 0.3092(2)   | 0.72182(19) | 0.0202(4)   |
| C(16) | 0.4440(3)   | 0.3388(2)   | 0.8391(2)   | 0.0220(4)   |
| C(17) | 0.4505(3)   | 0.2549(3)   | 0.9063(2)   | 0.0262(5)   |
| C(18) | 0.4884(3)   | 0.1394(3)   | 0.8557(2)   | 0.0285(5)   |
| C(19) | 0.5183(3)   | 0.1074(3)   | 0.7380(2)   | 0.0306(5)   |
| C(20) | 0.5127(3)   | 0.1918(2)   | 0.6709(2)   | 0.0257(5)   |

\* $U_{eq.}$  defined as one third of the trace of the orthogonalized **U** tensor.

Table S9. Bond lengths (Å) and bond angles (°)

|                 |            |                   |            |
|-----------------|------------|-------------------|------------|
| Br(1)-C(6)      | 1.906(2)   | C(3)-C(8)         | 1.413(3)   |
| P(1)-O(1)       | 1.4688(16) | C(4)-C(5)         | 1.379(3)   |
| P(1)-O(3)       | 1.5792(16) | C(5)-C(6)         | 1.407(3)   |
| P(1)-O(2)       | 1.5872(16) | C(6)-C(7)         | 1.383(3)   |
| P(1)-C(9)       | 1.798(2)   | C(7)-C(8)         | 1.399(3)   |
| O(2)-C(10)      | 1.461(3)   | C(10)-C(11)       | 1.502(3)   |
| O(3)-C(12)      | 1.470(3)   | C(12)-C(13)       | 1.493(3)   |
| N(1)-C(8)       | 1.375(3)   | C(14)-C(15)       | 1.520(3)   |
| N(1)-C(1)       | 1.380(3)   | C(15)-C(20)       | 1.393(3)   |
| N(1)-C(14)      | 1.455(3)   | C(15)-C(16)       | 1.393(3)   |
| C(1)-C(2)       | 1.370(3)   | C(16)-C(17)       | 1.389(3)   |
| C(2)-C(3)       | 1.433(3)   | C(17)-C(18)       | 1.390(3)   |
| C(2)-C(9)       | 1.503(3)   | C(18)-C(19)       | 1.384(3)   |
| C(3)-C(4)       | 1.405(3)   | C(19)-C(20)       | 1.390(3)   |
| O(1)-P(1)-O(3)  | 116.19(9)  | C(7)-C(6)-C(5)    | 123.2(2)   |
| O(1)-P(1)-O(2)  | 114.07(9)  | C(7)-C(6)-Br(1)   | 118.46(17) |
| O(3)-P(1)-O(2)  | 102.02(9)  | C(5)-C(6)-Br(1)   | 118.25(16) |
| O(1)-P(1)-C(9)  | 115.13(10) | C(6)-C(7)-C(8)    | 115.99(19) |
| O(3)-P(1)-C(9)  | 102.18(9)  | N(1)-C(8)-C(7)    | 129.72(19) |
| O(2)-P(1)-C(9)  | 105.60(9)  | N(1)-C(8)-C(3)    | 107.81(19) |
| C(10)-O(2)-P(1) | 119.62(15) | C(7)-C(8)-C(3)    | 122.47(19) |
| C(12)-O(3)-P(1) | 118.22(13) | C(2)-C(9)-P(1)    | 113.73(14) |
| C(8)-N(1)-C(1)  | 108.40(17) | O(2)-C(10)-C(11)  | 107.5(2)   |
| C(8)-N(1)-C(14) | 126.39(19) | O(3)-C(12)-C(13)  | 108.34(18) |
| C(1)-N(1)-C(14) | 124.67(18) | N(1)-C(14)-C(15)  | 113.91(17) |
| C(2)-C(1)-N(1)  | 110.30(19) | C(20)-C(15)-C(16) | 119.38(19) |
| C(1)-C(2)-C(3)  | 106.33(19) | C(20)-C(15)-C(14) | 122.19(19) |
| C(1)-C(2)-C(9)  | 127.3(2)   | C(16)-C(15)-C(14) | 118.41(19) |
| C(3)-C(2)-C(9)  | 126.37(19) | C(17)-C(16)-C(15) | 120.4(2)   |
| C(4)-C(3)-C(8)  | 119.2(2)   | C(16)-C(17)-C(18) | 119.8(2)   |
| C(4)-C(3)-C(2)  | 133.6(2)   | C(19)-C(18)-C(17) | 120.0(2)   |
| C(8)-C(3)-C(2)  | 107.13(18) | C(18)-C(19)-C(20) | 120.2(2)   |
| C(5)-C(4)-C(3)  | 119.2(2)   | C(19)-C(20)-C(15) | 120.1(2)   |
| C(4)-C(5)-C(6)  | 119.8(2)   |                   |            |

Table S10. Anisotropic thermal parameters\* ( $\text{\AA}^2$ )

| Atoms | $U_{11}$    | $U_{22}$    | $U_{33}$    | $U_{23}$    | $U_{13}$    | $U_{12}$    |
|-------|-------------|-------------|-------------|-------------|-------------|-------------|
| Br(1) | 0.02424(15) | 0.02680(15) | 0.02637(15) | 0.00844(10) | 0.00320(10) | 0.00844(11) |
| P(1)  | 0.0228(3)   | 0.0225(3)   | 0.0179(2)   | 0.0094(2)   | 0.0072(2)   | 0.0098(2)   |
| O(1)  | 0.0264(8)   | 0.0325(8)   | 0.0233(7)   | 0.0149(7)   | 0.0061(7)   | 0.0134(7)   |
| O(2)  | 0.0255(8)   | 0.0309(8)   | 0.0195(7)   | 0.0068(6)   | 0.0080(6)   | 0.0119(7)   |
| O(3)  | 0.0300(8)   | 0.0211(7)   | 0.0195(7)   | 0.0100(6)   | 0.0085(6)   | 0.0091(6)   |
| N(1)  | 0.0254(9)   | 0.0201(8)   | 0.0159(8)   | 0.0092(7)   | 0.0057(7)   | 0.0101(7)   |
| C(1)  | 0.0251(11)  | 0.0182(9)   | 0.0195(9)   | 0.0097(8)   | 0.0041(8)   | 0.0089(8)   |
| C(2)  | 0.0263(11)  | 0.0174(9)   | 0.0215(10)  | 0.0114(8)   | 0.0069(9)   | 0.0095(8)   |
| C(3)  | 0.0250(11)  | 0.0180(9)   | 0.0199(10)  | 0.0111(8)   | 0.0078(8)   | 0.0101(8)   |
| C(4)  | 0.0302(11)  | 0.0195(10)  | 0.0182(9)   | 0.0090(8)   | 0.0089(9)   | 0.0129(9)   |
| C(5)  | 0.0319(12)  | 0.0206(10)  | 0.0200(10)  | 0.0090(8)   | 0.0054(9)   | 0.0113(9)   |
| C(6)  | 0.0254(11)  | 0.0199(10)  | 0.0245(10)  | 0.0104(8)   | 0.0048(9)   | 0.0089(9)   |
| C(7)  | 0.0251(11)  | 0.0194(10)  | 0.0204(10)  | 0.0108(8)   | 0.0087(8)   | 0.0099(8)   |
| C(8)  | 0.0277(11)  | 0.0161(9)   | 0.0184(9)   | 0.0098(8)   | 0.0068(8)   | 0.0098(8)   |
| C(9)  | 0.0237(11)  | 0.0225(10)  | 0.0220(10)  | 0.0095(8)   | 0.0070(9)   | 0.0112(9)   |
| C(10) | 0.0367(13)  | 0.0292(12)  | 0.0208(11)  | 0.0059(9)   | 0.0101(10)  | 0.0127(10)  |
| C(11) | 0.0434(15)  | 0.0465(15)  | 0.0269(12)  | 0.0146(11)  | 0.0164(11)  | 0.0275(13)  |
| C(12) | 0.0411(14)  | 0.0246(11)  | 0.0279(11)  | 0.0164(10)  | 0.0089(10)  | 0.0080(10)  |
| C(13) | 0.0384(14)  | 0.0227(11)  | 0.0328(12)  | 0.0118(10)  | 0.0109(11)  | 0.0080(10)  |
| C(14) | 0.0309(12)  | 0.0224(10)  | 0.0177(9)   | 0.0100(8)   | 0.0089(9)   | 0.0128(9)   |
| C(15) | 0.0211(10)  | 0.0192(10)  | 0.0189(9)   | 0.0090(8)   | 0.0040(8)   | 0.0067(8)   |
| C(16) | 0.0238(11)  | 0.0219(10)  | 0.0201(10)  | 0.0090(8)   | 0.0067(8)   | 0.0092(9)   |
| C(17) | 0.0299(12)  | 0.0293(11)  | 0.0197(10)  | 0.0128(9)   | 0.0080(9)   | 0.0104(10)  |
| C(18) | 0.0341(13)  | 0.0285(11)  | 0.0289(11)  | 0.0195(10)  | 0.0086(10)  | 0.0130(10)  |
| C(19) | 0.0423(14)  | 0.0251(11)  | 0.0333(12)  | 0.0162(10)  | 0.0141(11)  | 0.0187(11)  |
| C(20) | 0.0350(12)  | 0.0237(11)  | 0.0217(10)  | 0.0114(9)   | 0.0122(9)   | 0.0132(10)  |

\*The exponent takes the form:  $-2\pi^2 \sum \sum U_{ij} h_i h_j \mathbf{a}_i^* \mathbf{a}_j^*$

Table S11. Coordinates and isotropic temperature factors\* ( $\text{\AA}^2$ ) for H atoms

| Atoms  | <i>x</i> | <i>y</i> | <i>z</i> | $U_{eq.}$ |
|--------|----------|----------|----------|-----------|
| H(1)   | 0.7731   | 0.4623   | 0.5894   | 0.025     |
| H(4)   | 0.4842   | 0.1666   | 0.1430   | 0.026     |
| H(5)   | 0.1999   | 0.0542   | 0.0835   | 0.029     |
| H(7)   | 0.1828   | 0.2341   | 0.4461   | 0.025     |
| H(9A)  | 0.7912   | 0.2444   | 0.2887   | 0.027     |
| H(9B)  | 0.9120   | 0.3801   | 0.4143   | 0.027     |
| H(10A) | 0.9036   | 0.3581   | 0.0154   | 0.037     |
| H(10B) | 0.9080   | 0.2361   | 0.0644   | 0.037     |
| H(11A) | 1.1868   | 0.4586   | 0.0422   | 0.054     |
| H(11B) | 1.1066   | 0.2885   | -0.0476  | 0.054     |
| H(11C) | 1.1951   | 0.3423   | 0.0964   | 0.054     |
| H(12A) | 0.9429   | 0.7614   | 0.2956   | 0.038     |
| H(12B) | 1.0941   | 0.7275   | 0.2707   | 0.038     |
| H(13A) | 1.0754   | 0.8998   | 0.5065   | 0.049     |
| H(13B) | 1.1955   | 0.9606   | 0.4261   | 0.049     |
| H(13C) | 1.2217   | 0.8570   | 0.4894   | 0.049     |
| H(14A) | 0.3704   | 0.4071   | 0.6412   | 0.027     |
| H(14B) | 0.5586   | 0.5116   | 0.7111   | 0.027     |
| H(16)  | 0.4166   | 0.4169   | 0.8732   | 0.026     |
| H(17)  | 0.4290   | 0.2763   | 0.9867   | 0.031     |
| H(18)  | 0.4939   | 0.0825   | 0.9019   | 0.034     |
| H(19)  | 0.5426   | 0.0275   | 0.7030   | 0.037     |
| H(20)  | 0.5330   | 0.1693   | 0.5901   | 0.031     |

\*The exponent takes the form:  $-8\pi^2 U \sin^2\theta/\lambda^2$

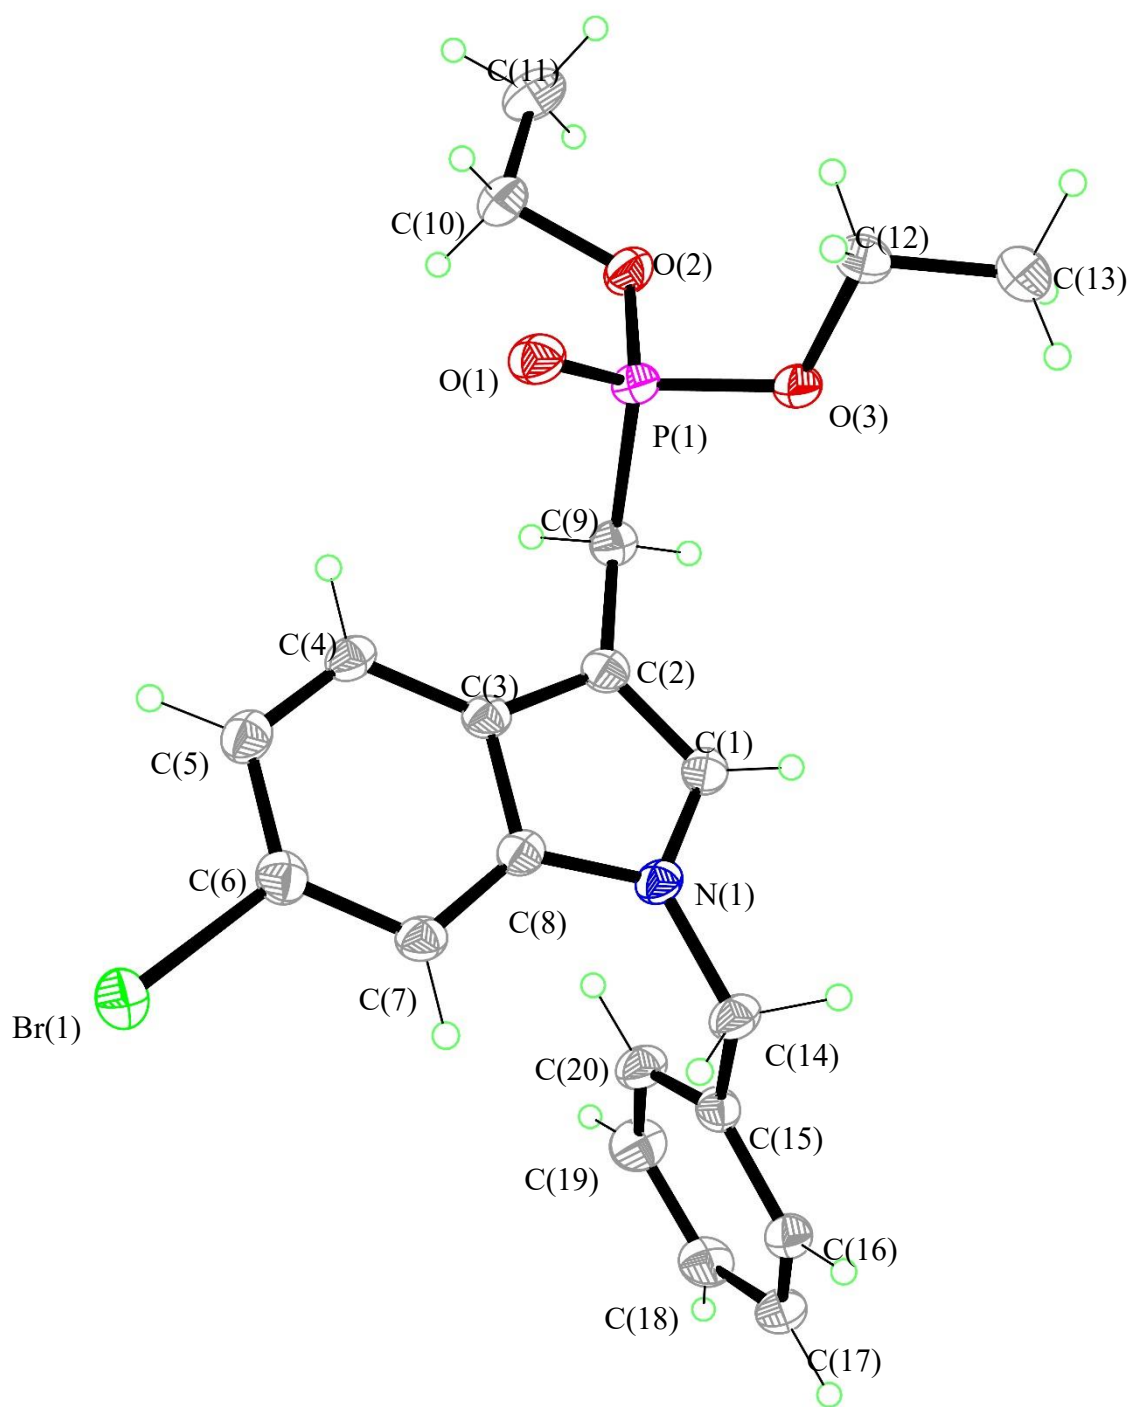

Figure S7 ORTEP drawing of  $C_{20}H_{23}BrNO_3P$  with 50% probability ellipsoids, showing the atomic numbering scheme.

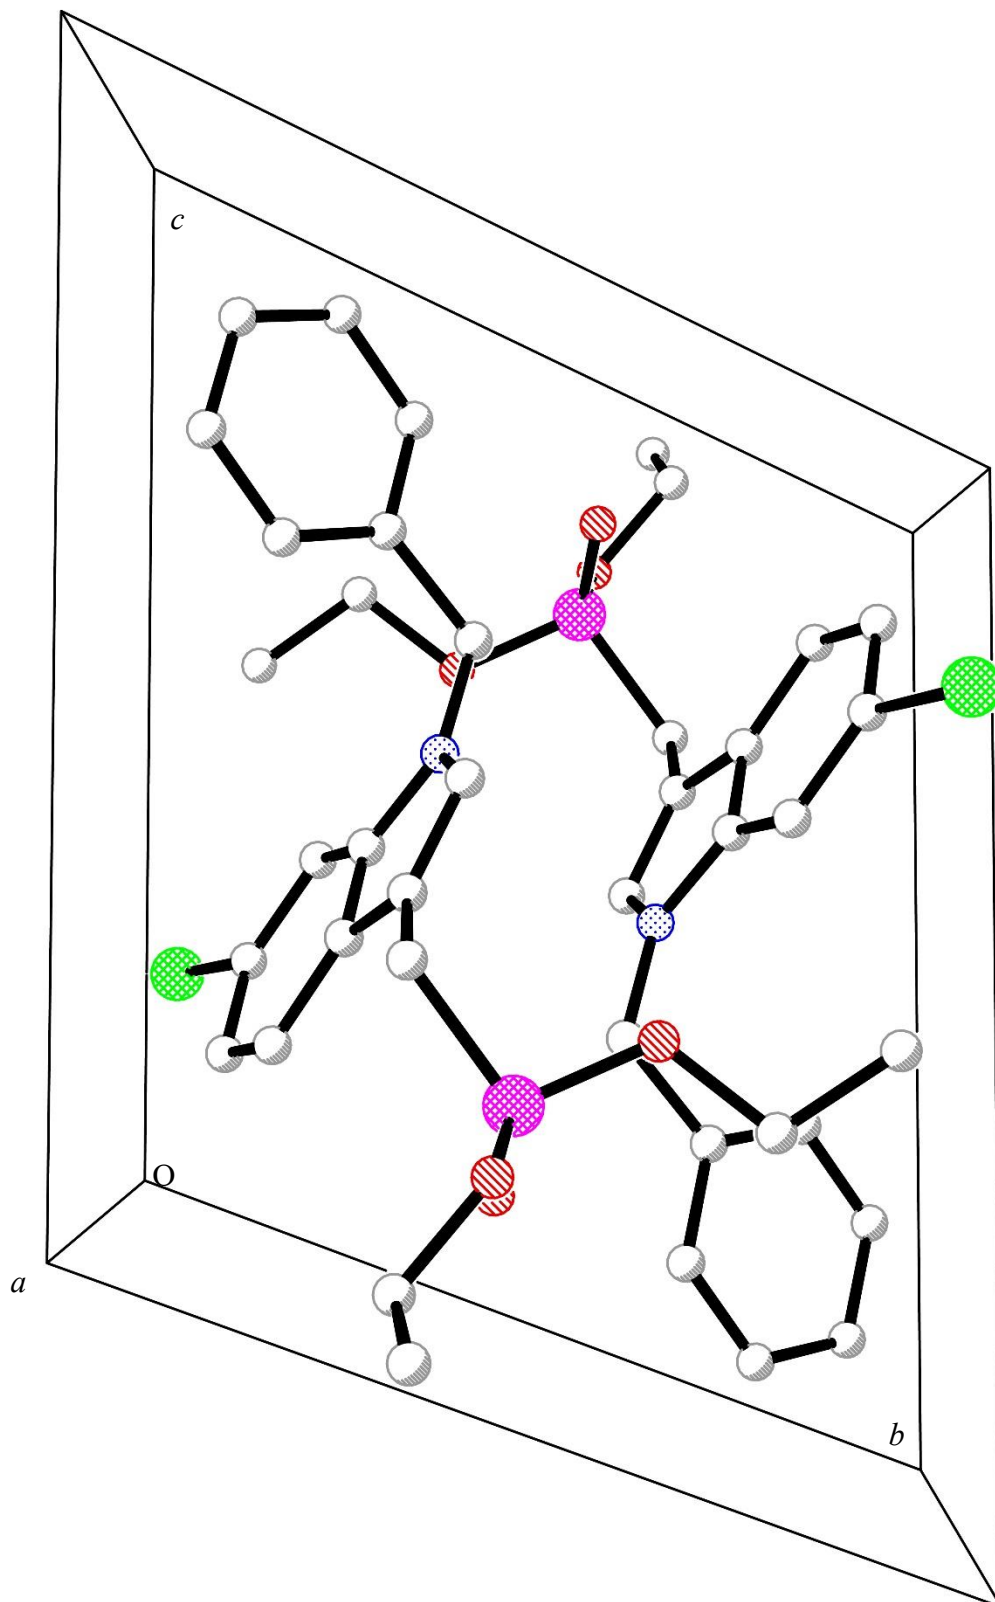

Figure S8 A packing view along the *a* direction



## 10. NMR Spectra.

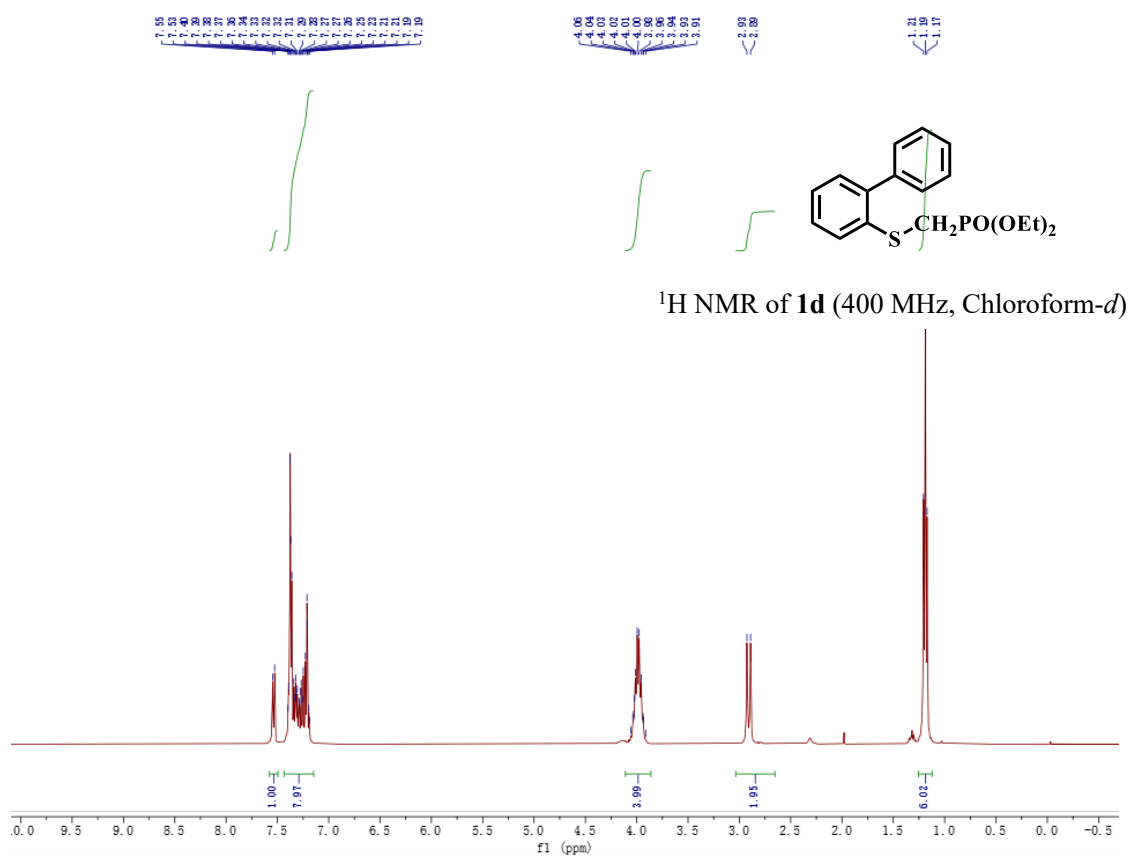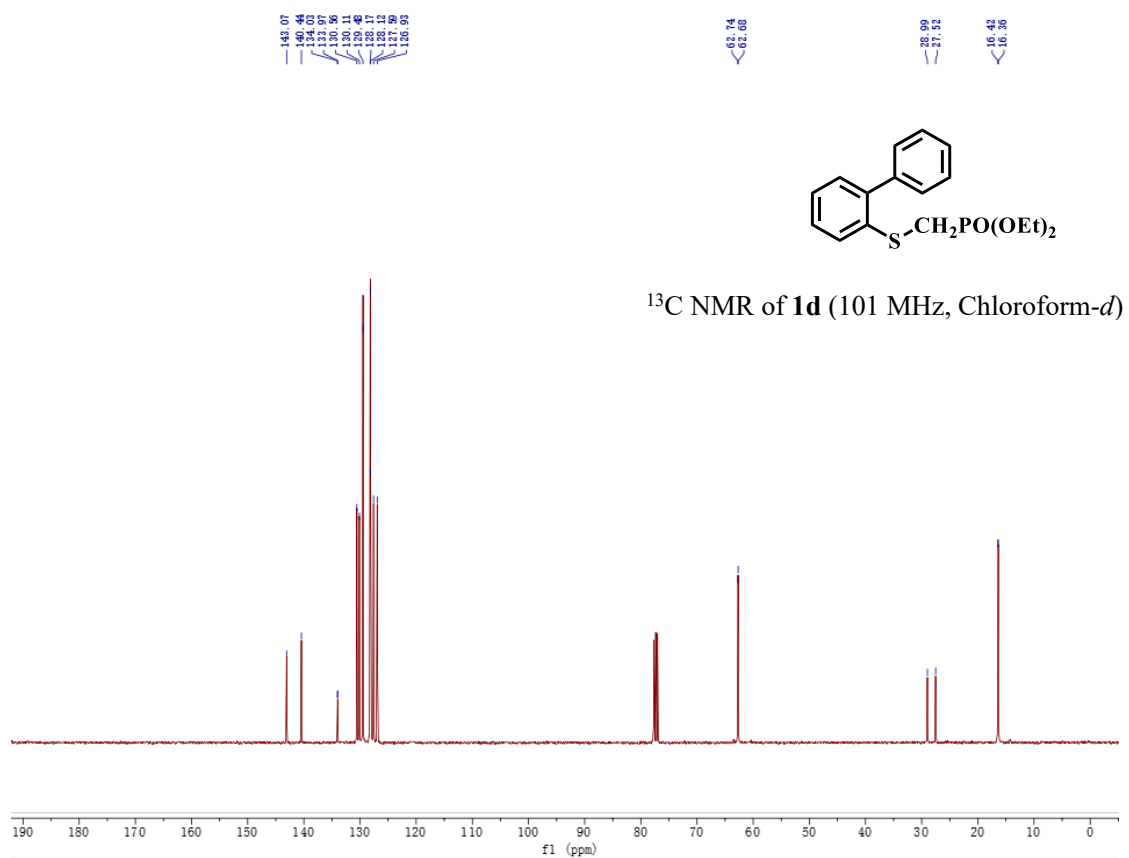

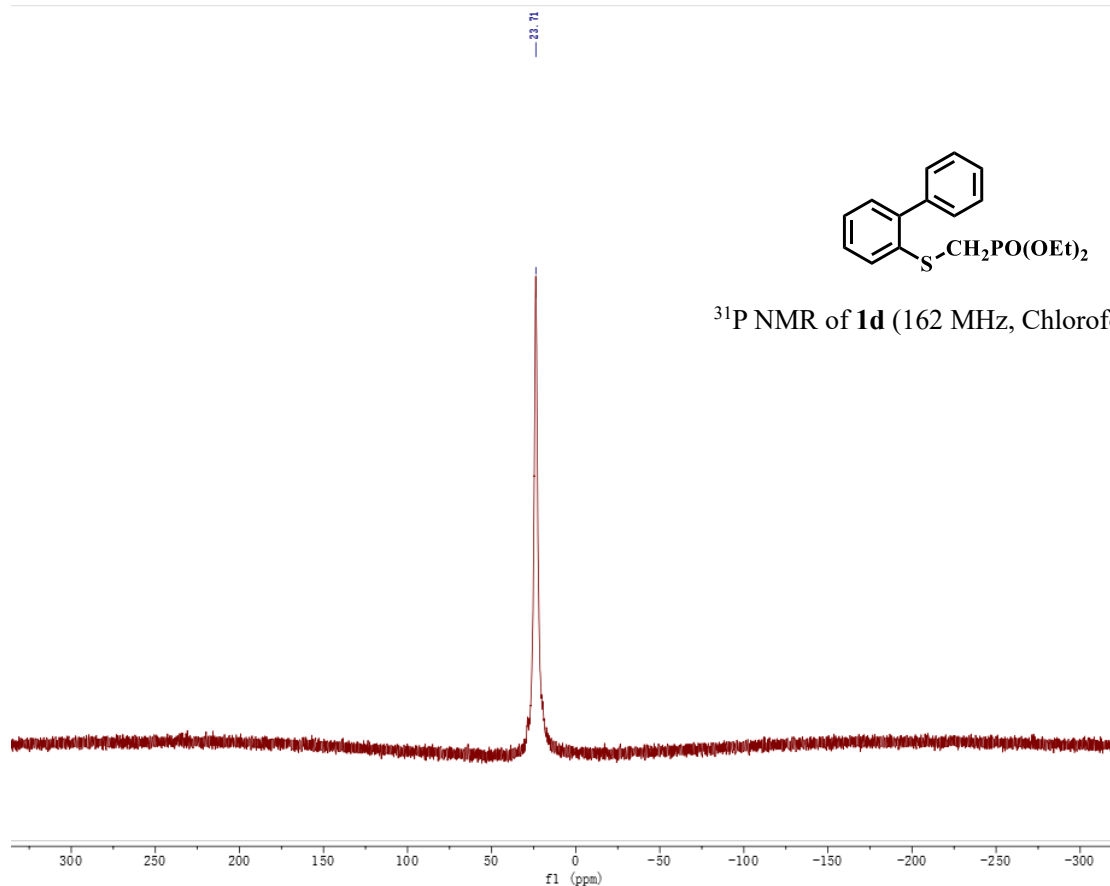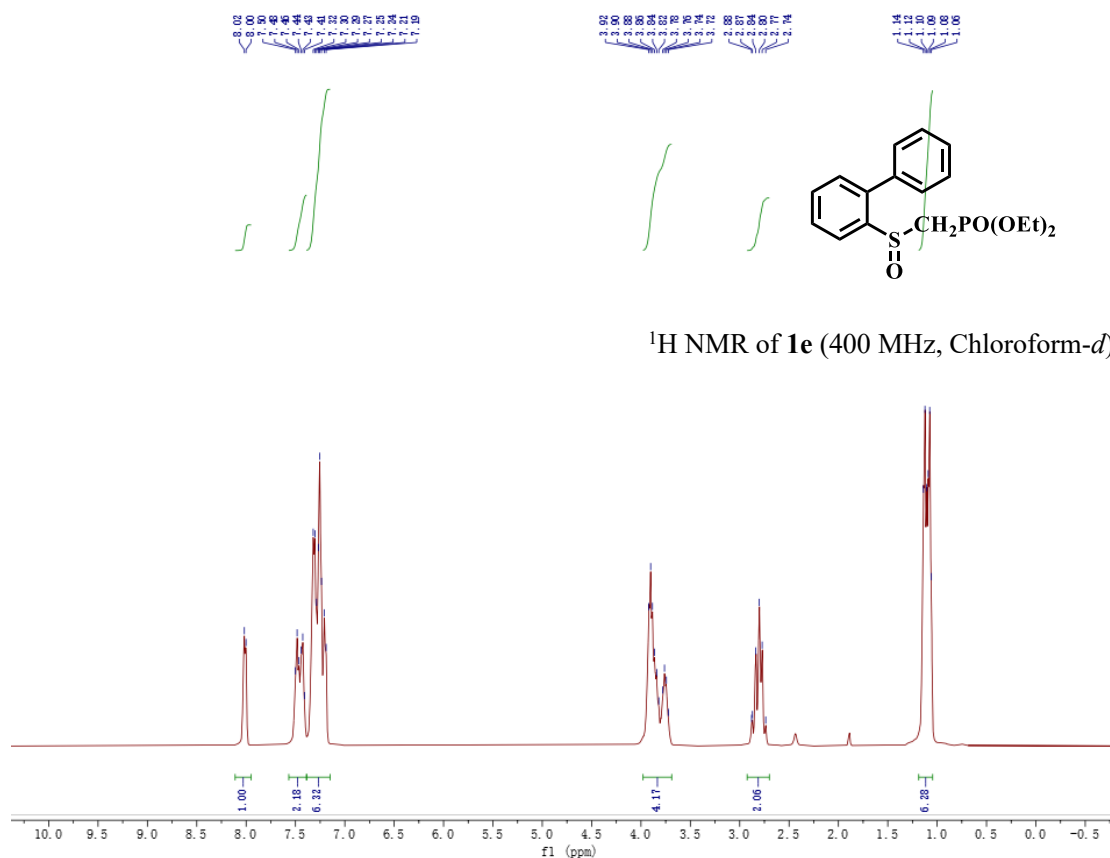

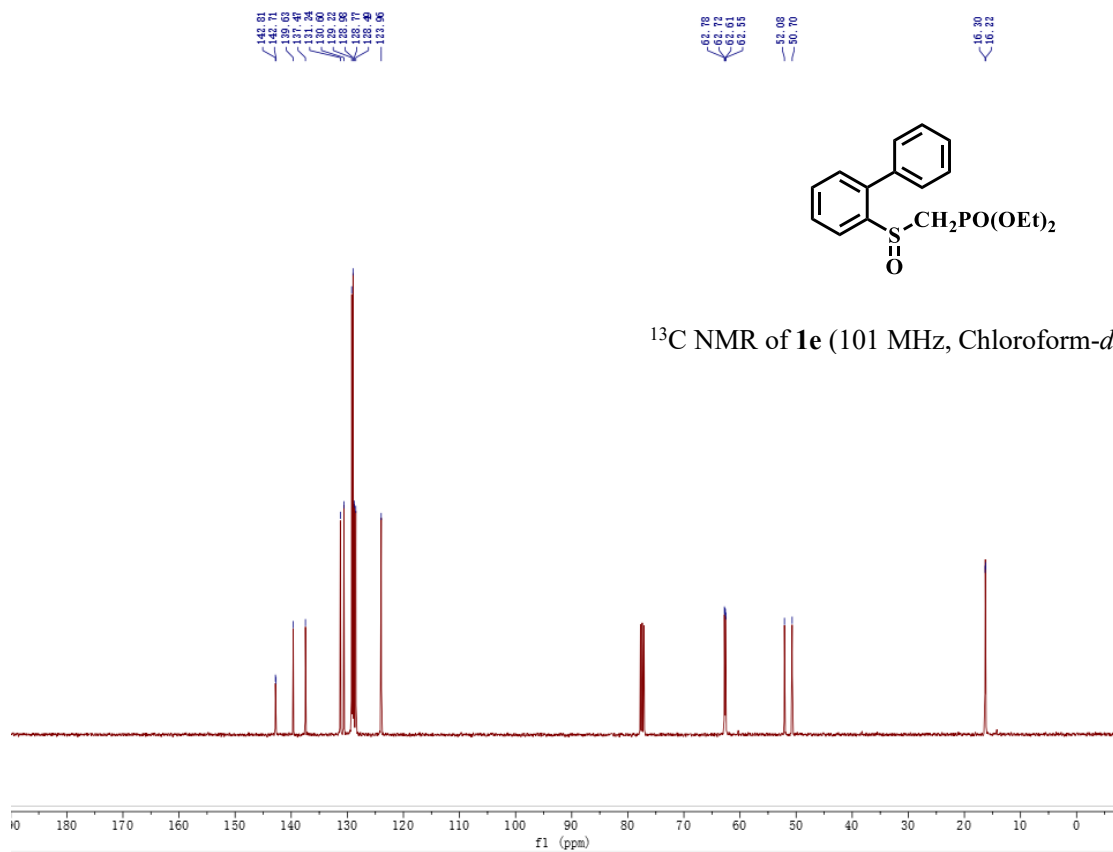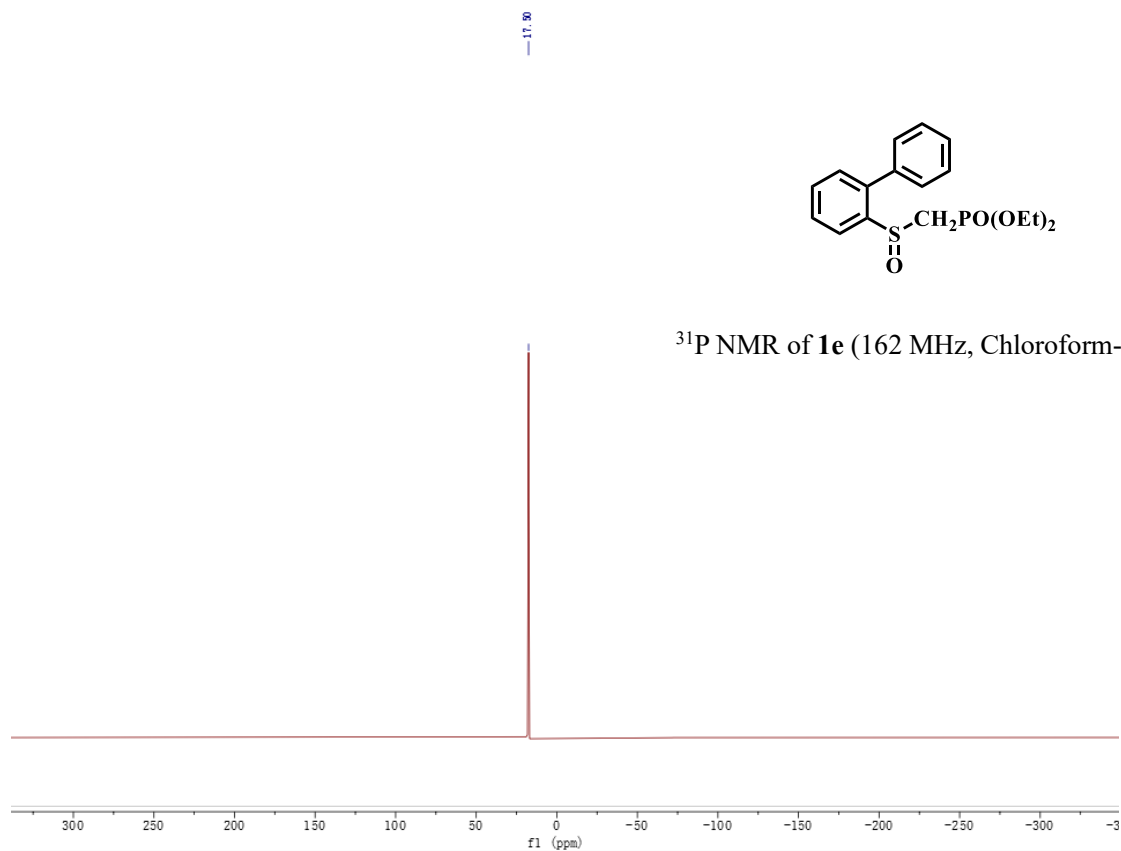

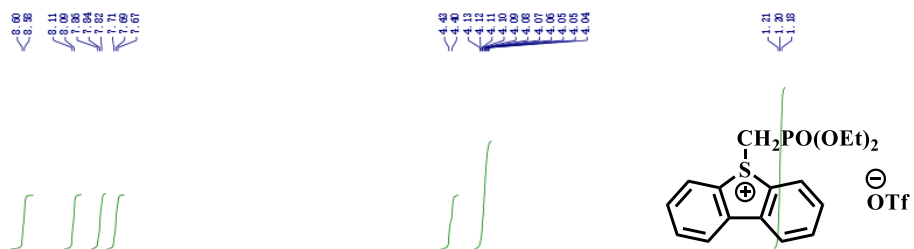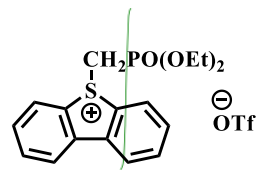

$^1\text{H}$  NMR of I (400 MHz, Chloroform-*d*)

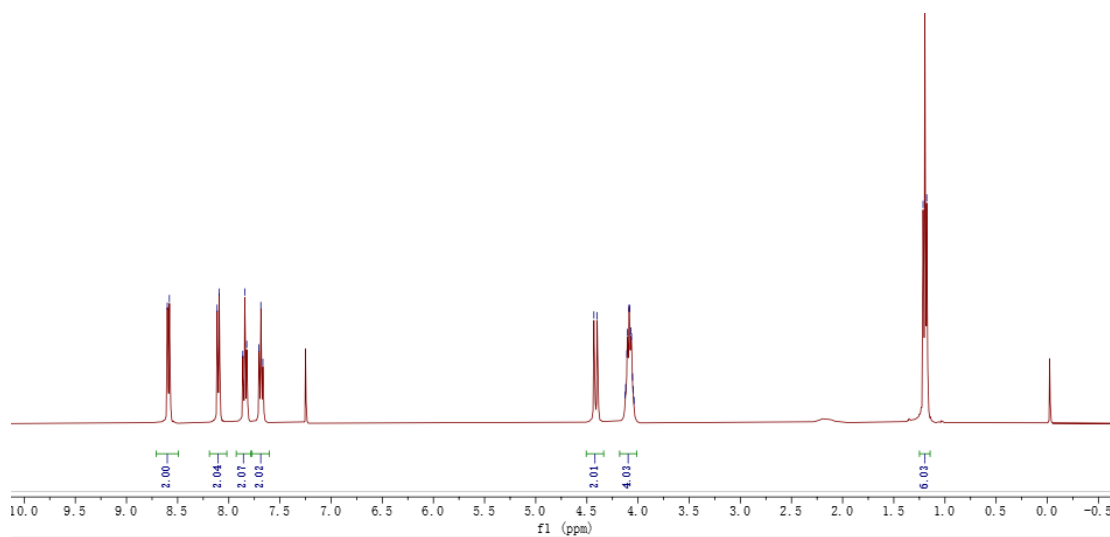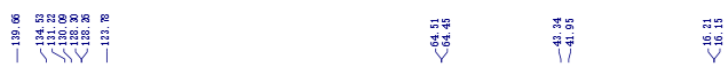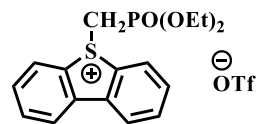

$^{13}\text{C}$  NMR of I (101 MHz, Chloroform-*d*)

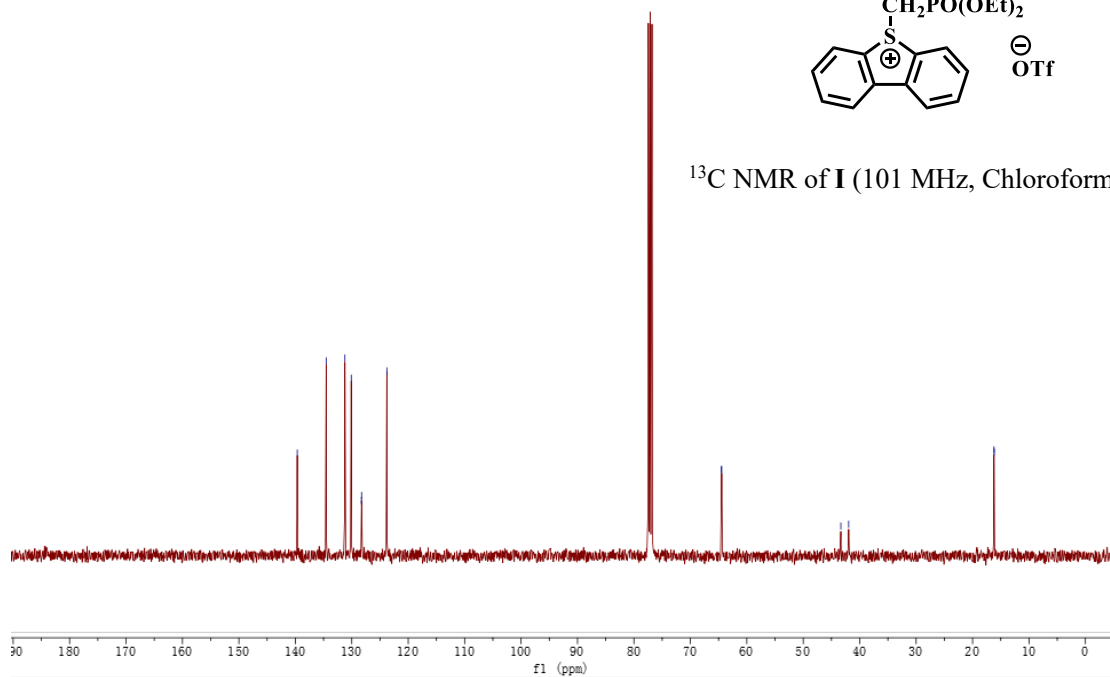

-18.13

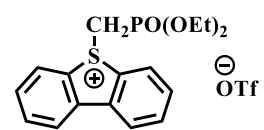

<sup>19</sup>F NMR of **I** (376 MHz, Chloroform-*d*)

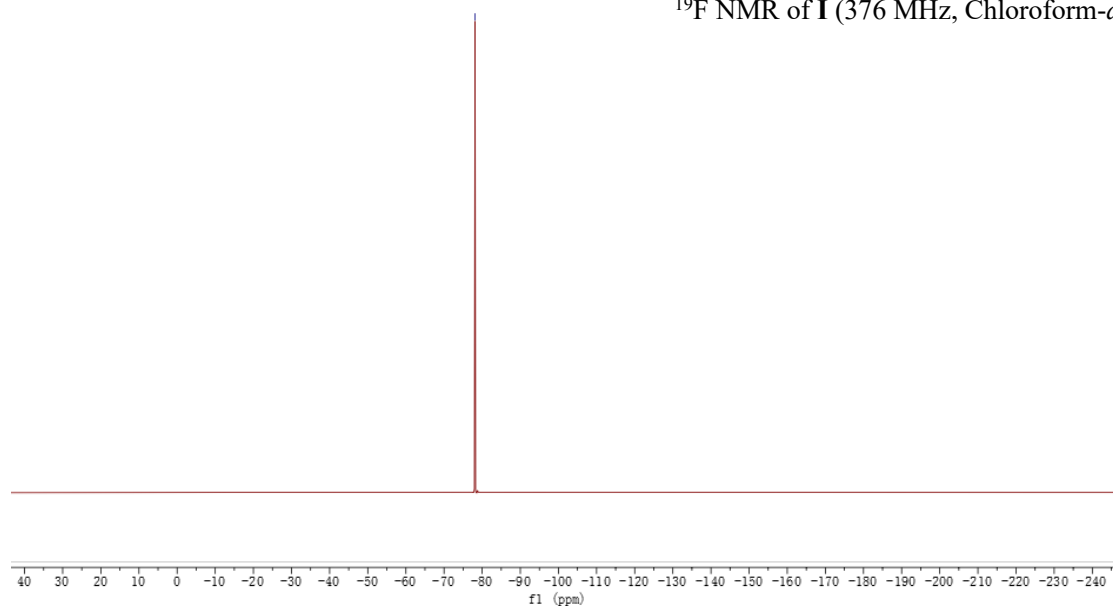

-11.68

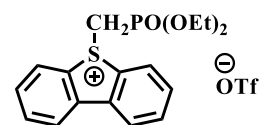

<sup>31</sup>P NMR of **I** (162 MHz, Chloroform-*d*)

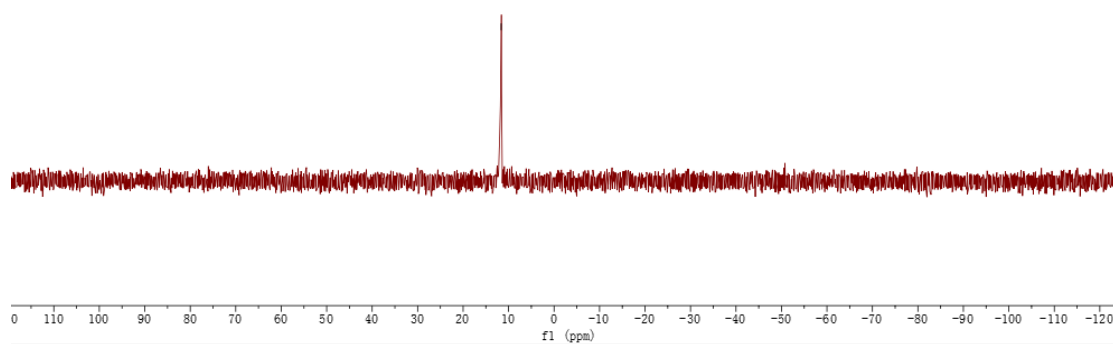

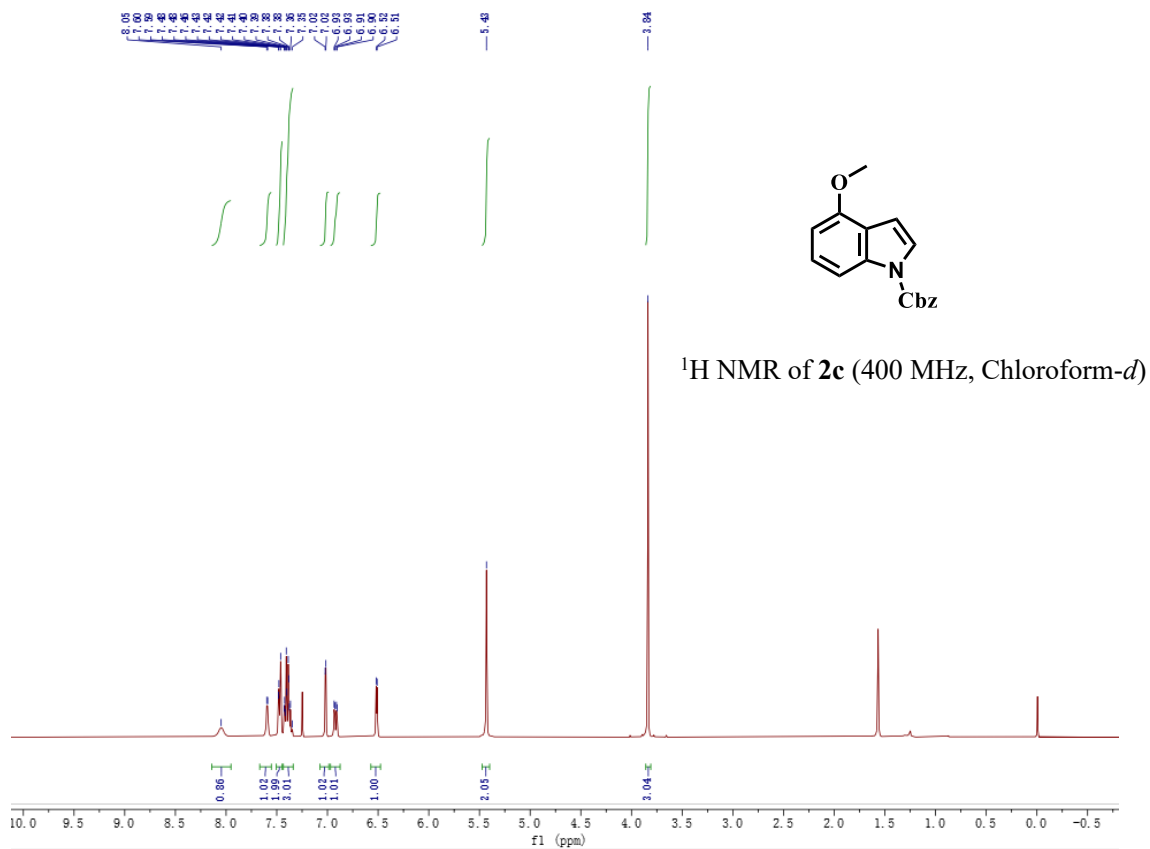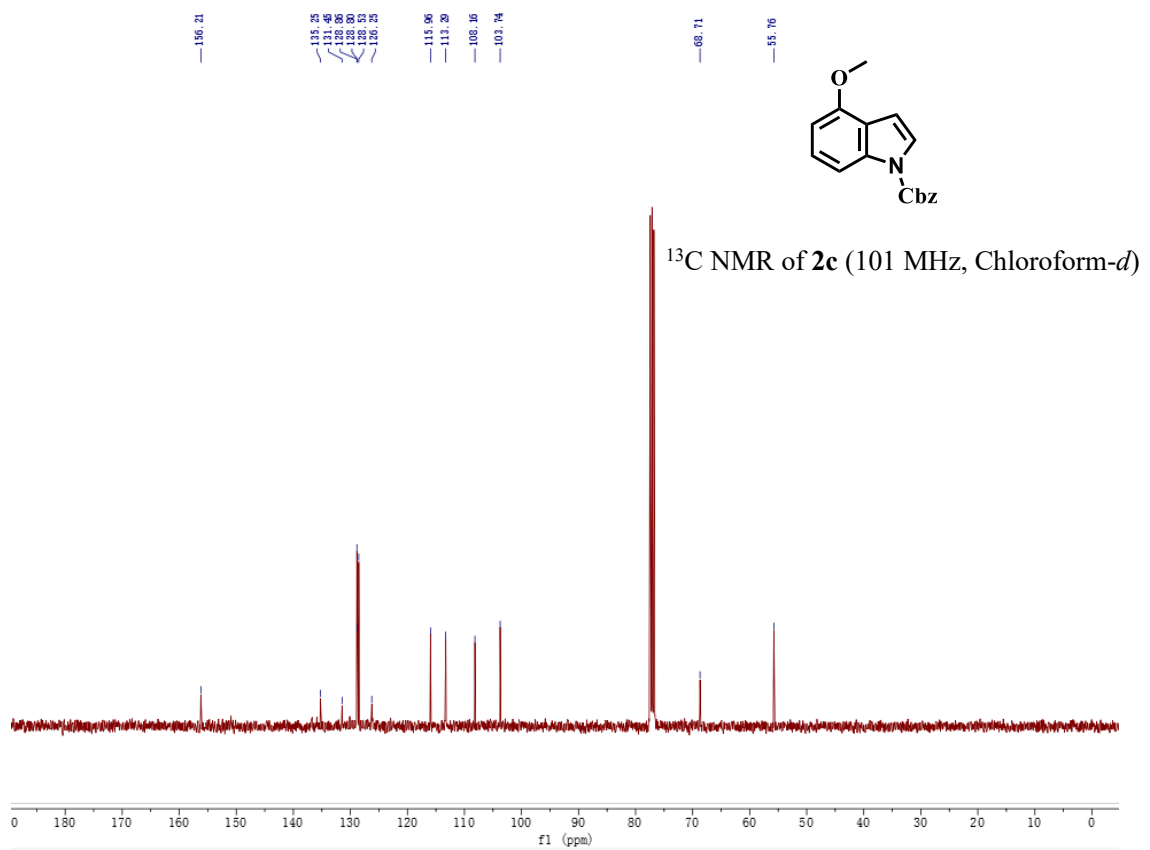

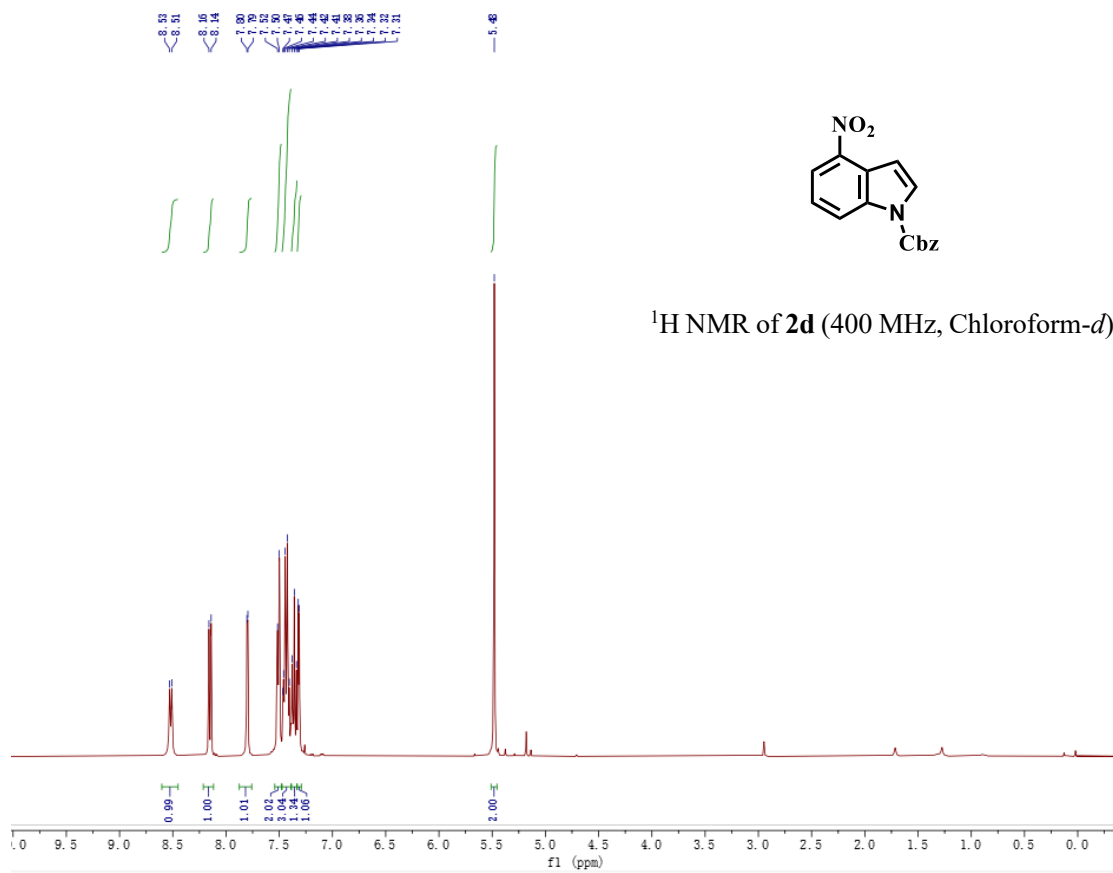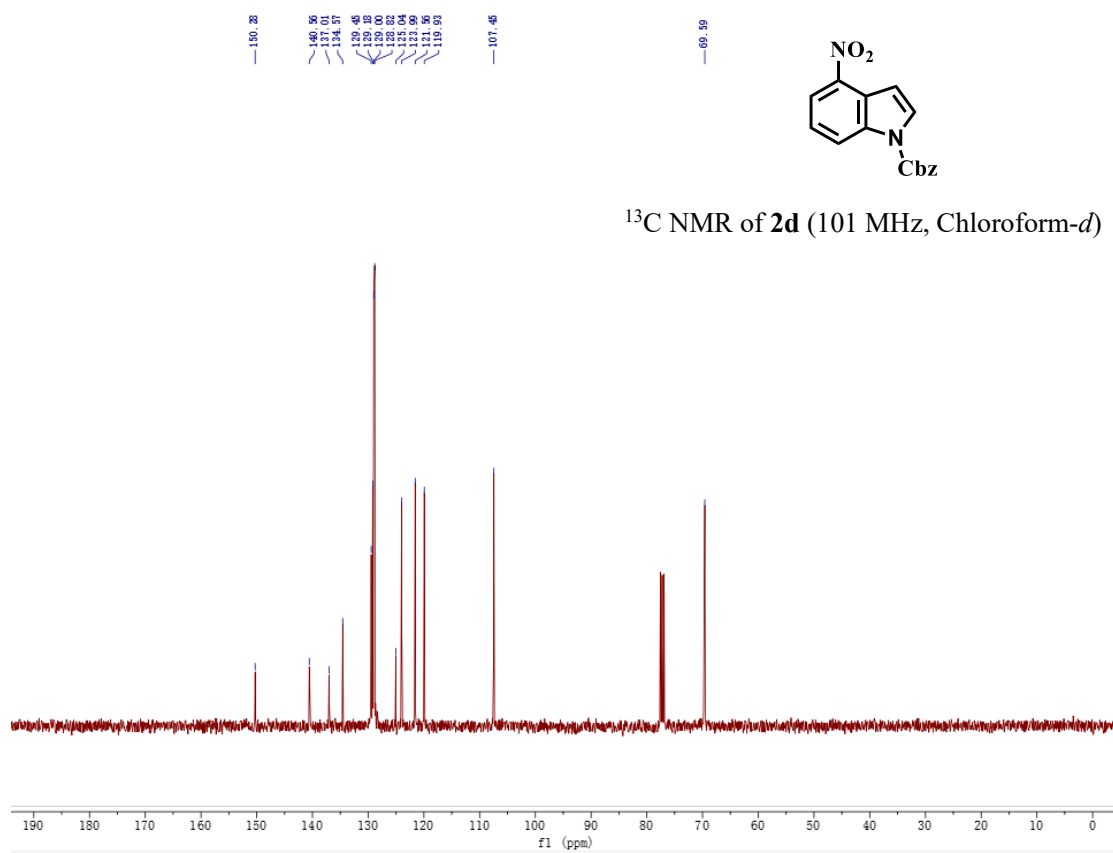

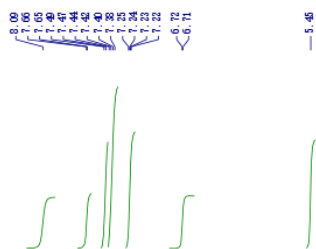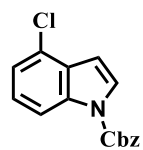

<sup>1</sup>H NMR of **2e** (400 MHz, Chloroform-*d*)

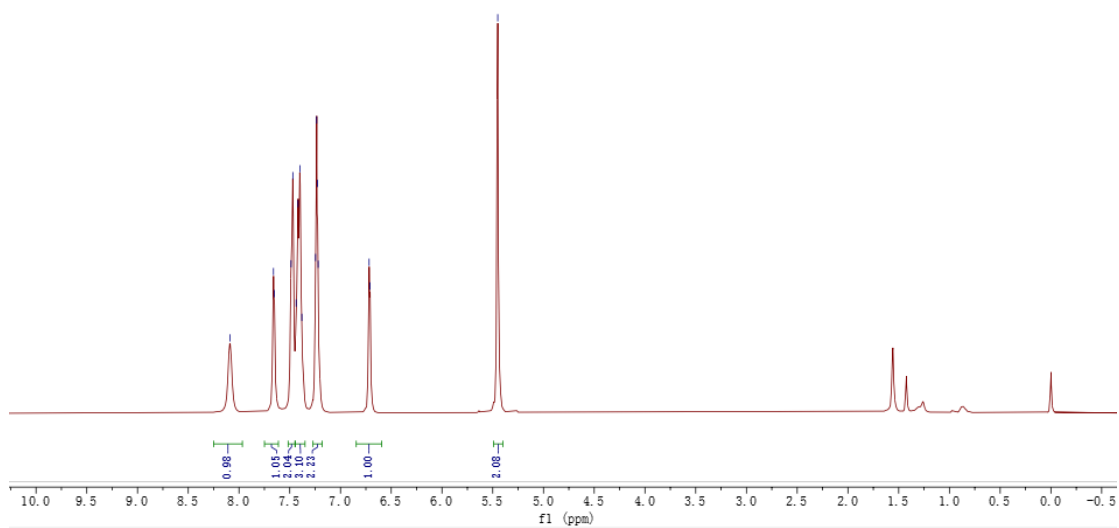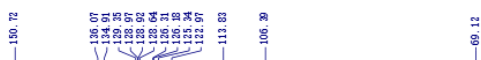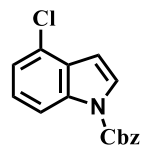

<sup>13</sup>C NMR of **2e** (101 MHz, Chloroform-*d*)

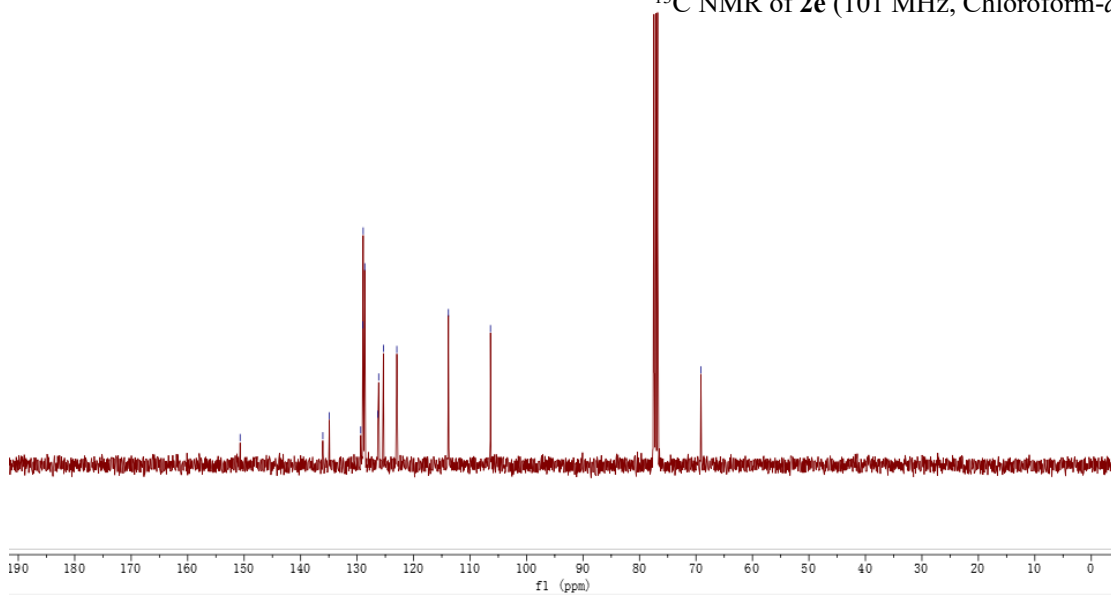



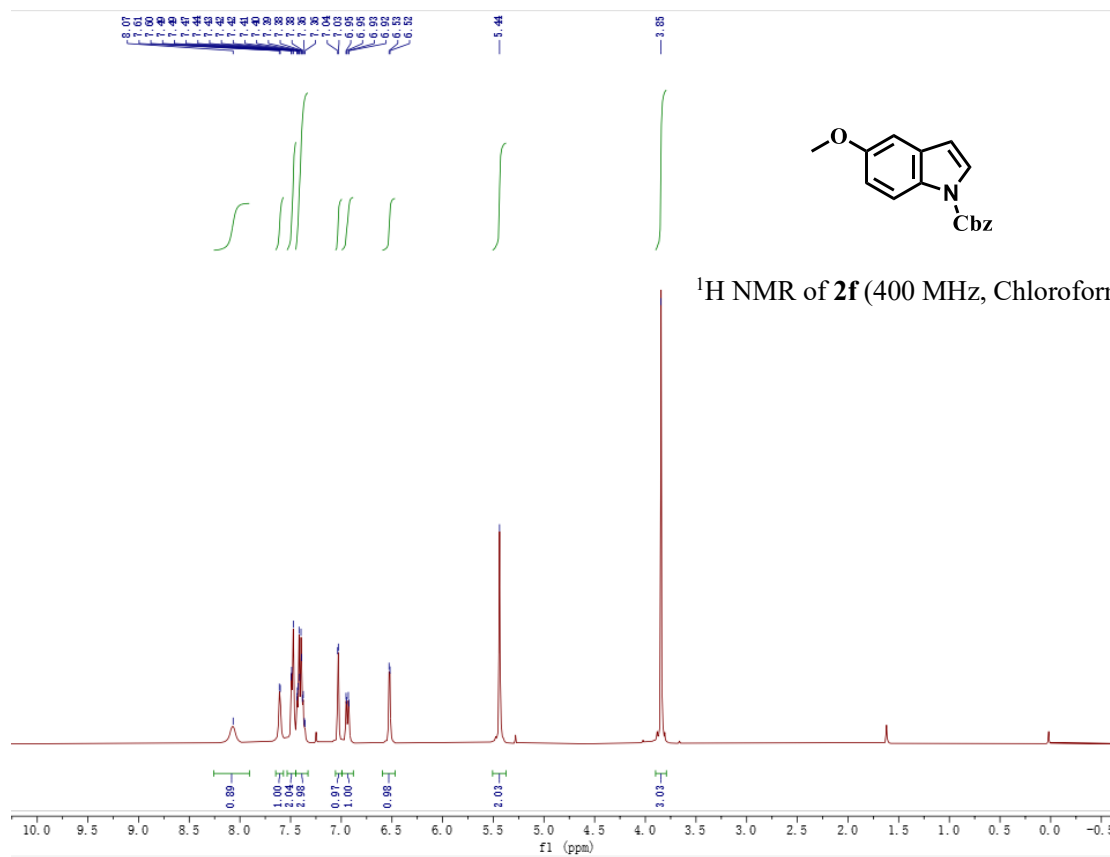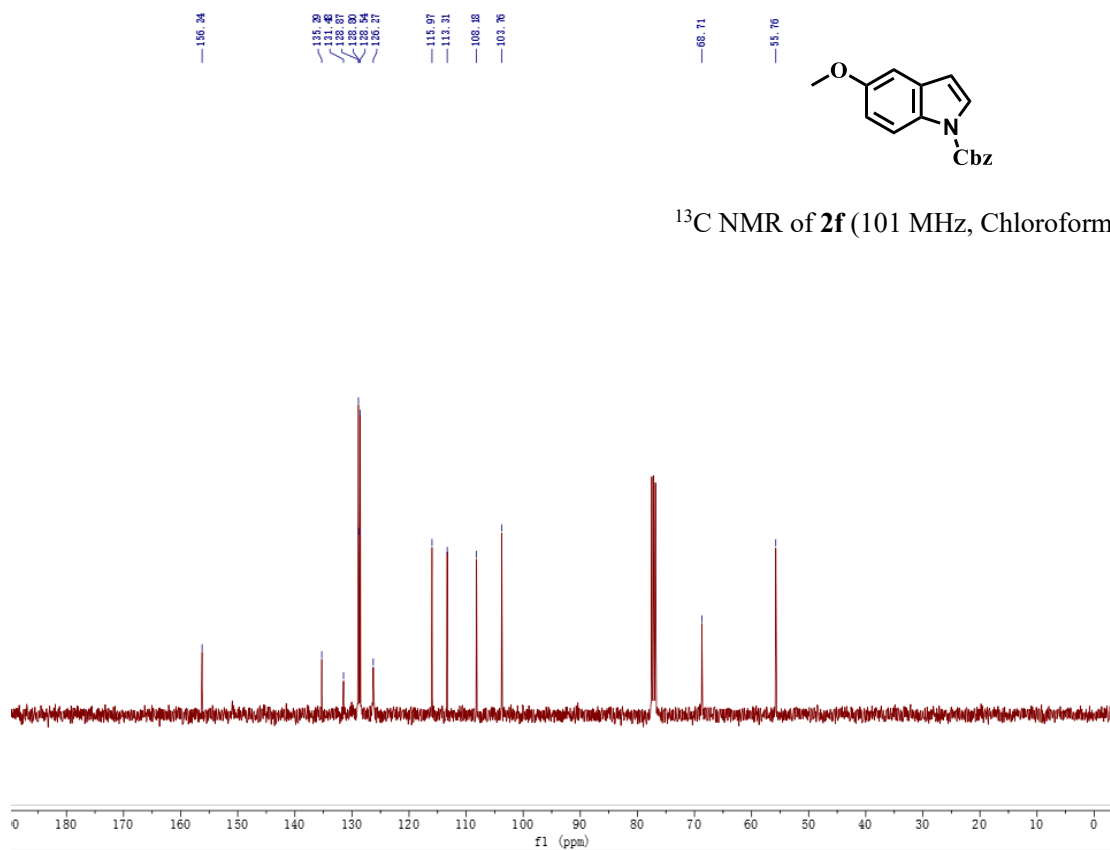

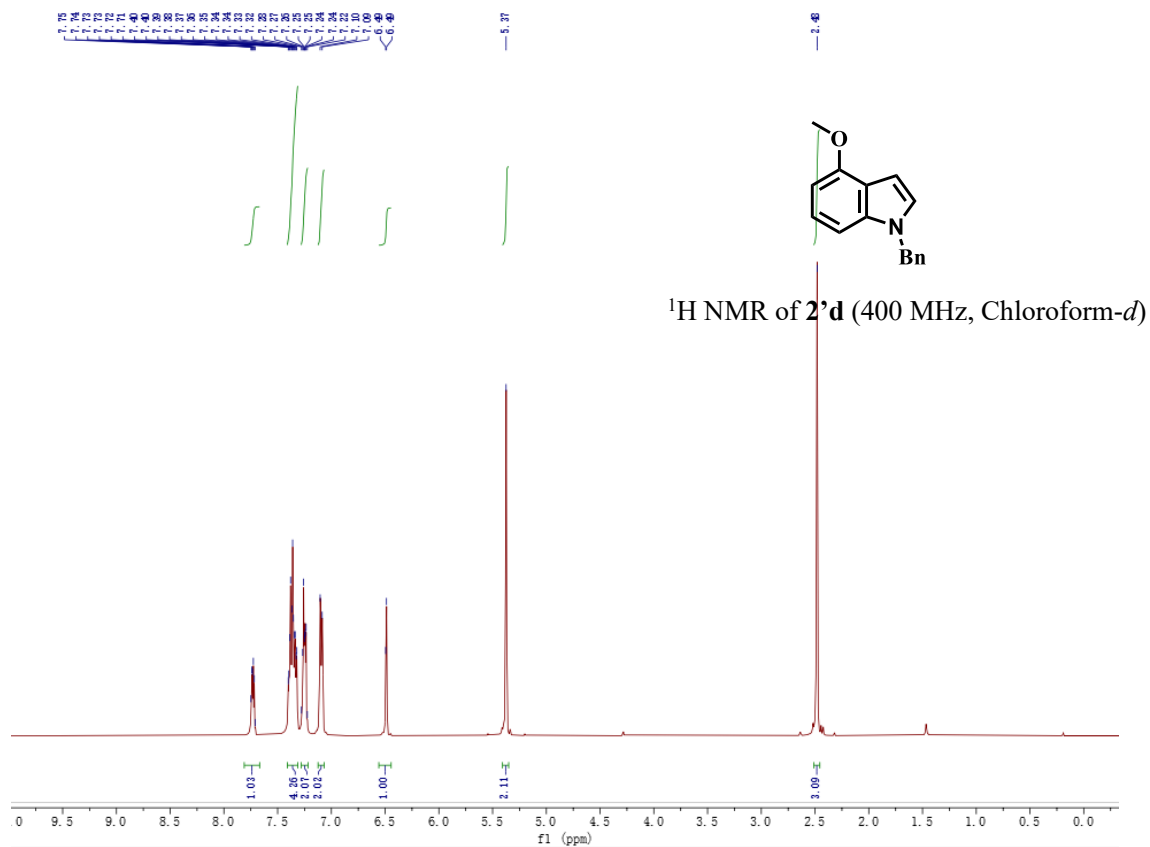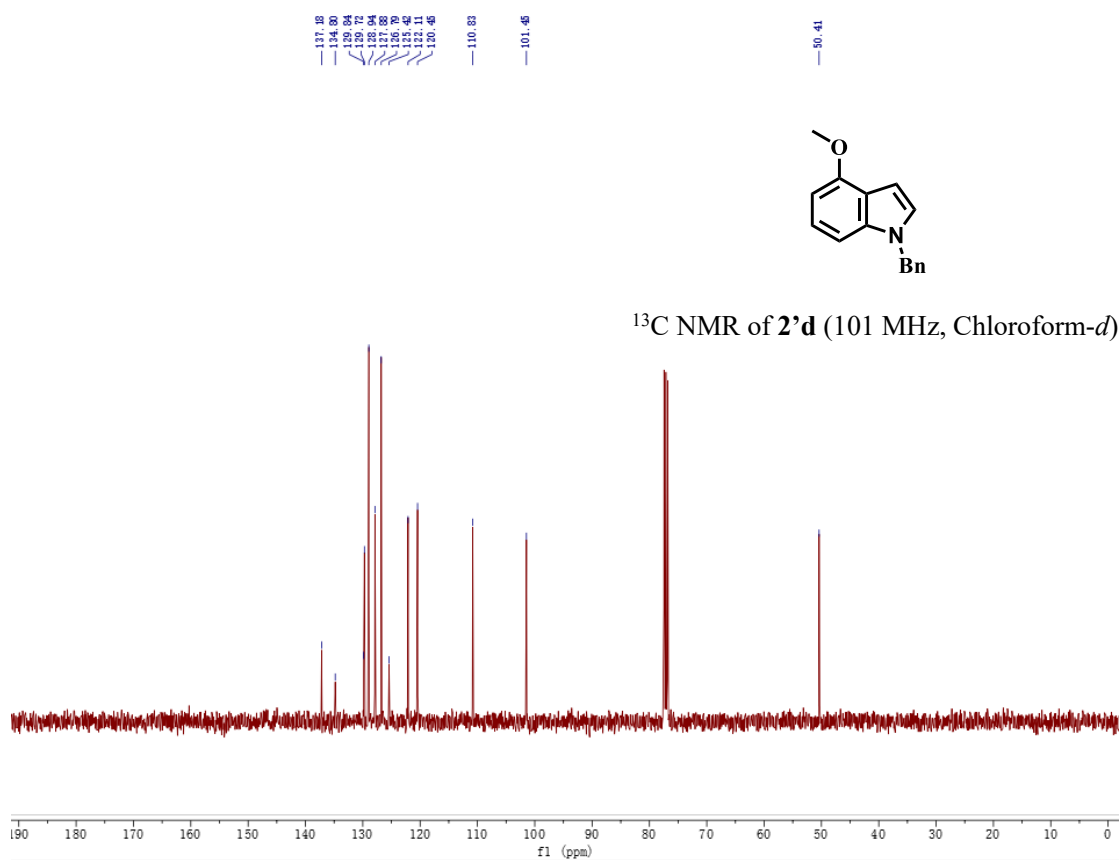

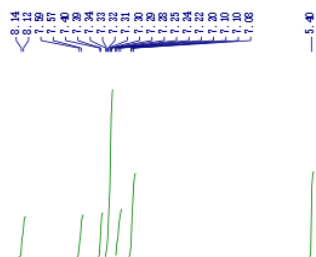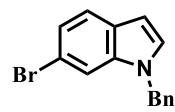

$^1\text{H}$  NMR of **2'n** (400 MHz, Chloroform-*d*)

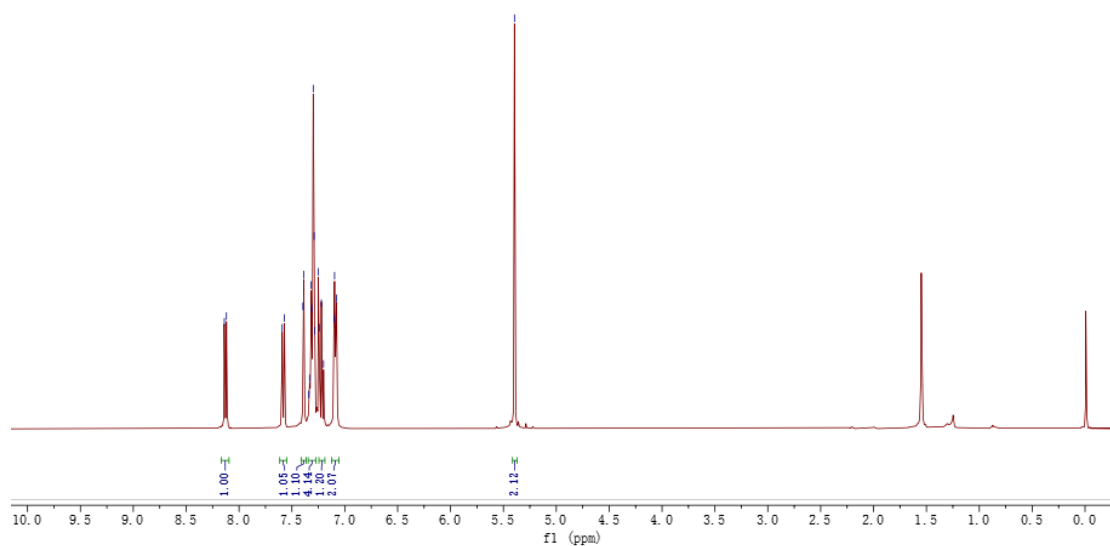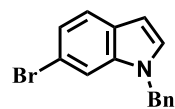

$^{13}\text{C}$  NMR of **2'n** (101 MHz, Chloroform-*d*)

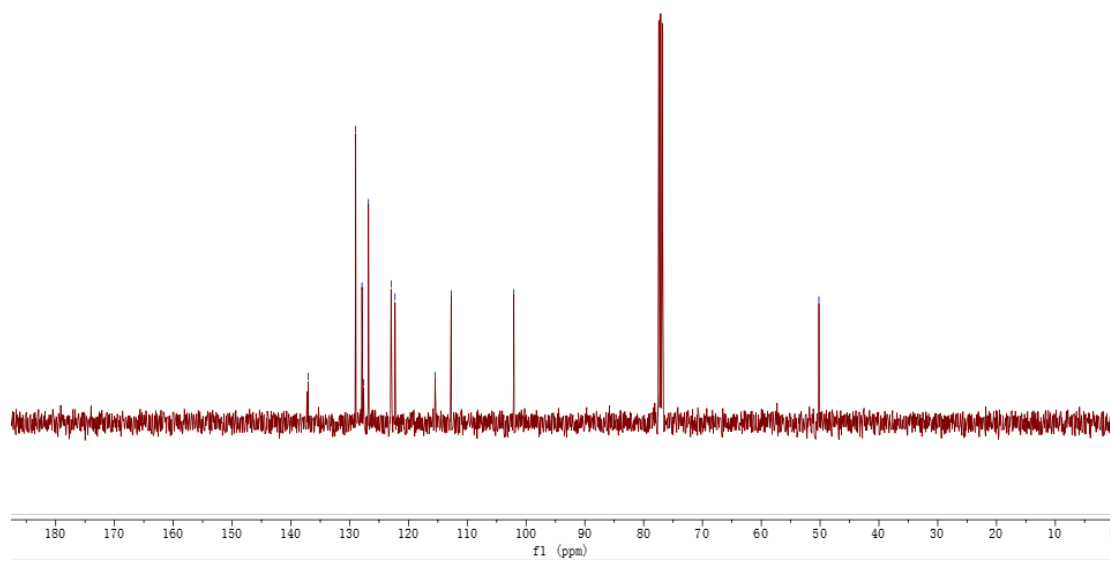

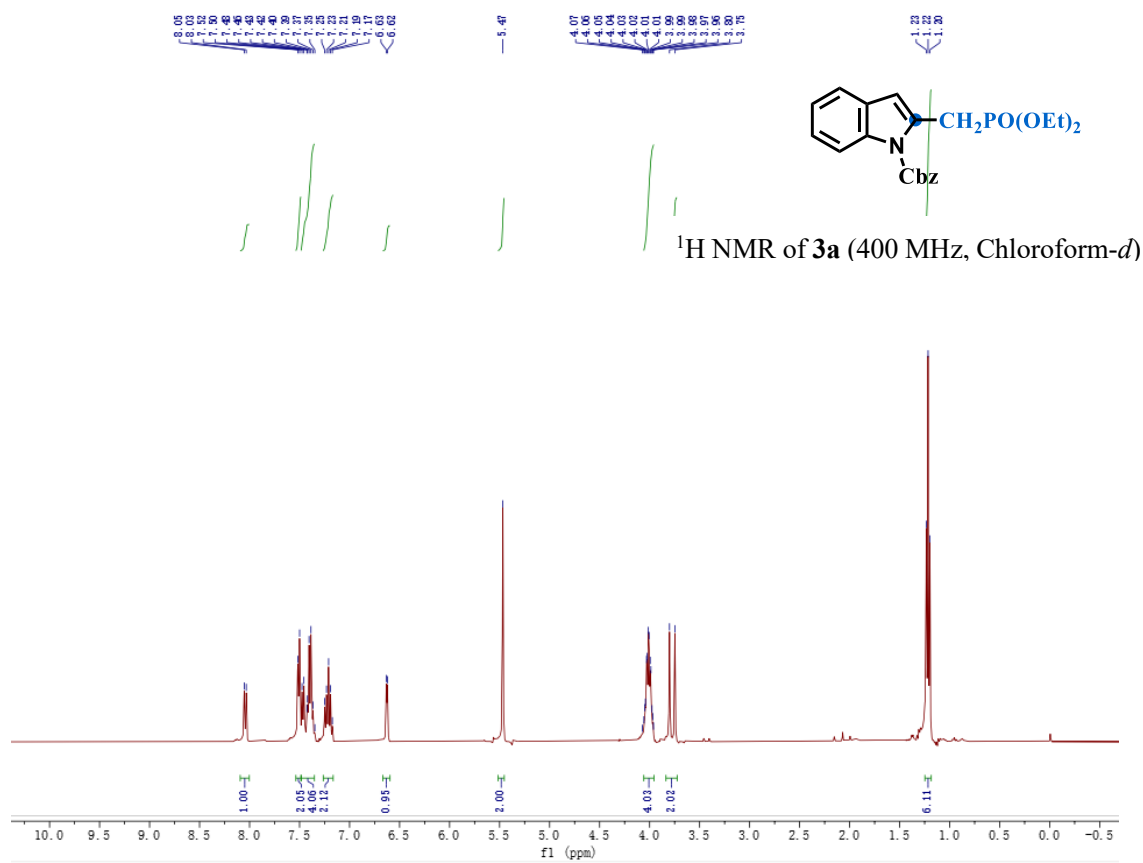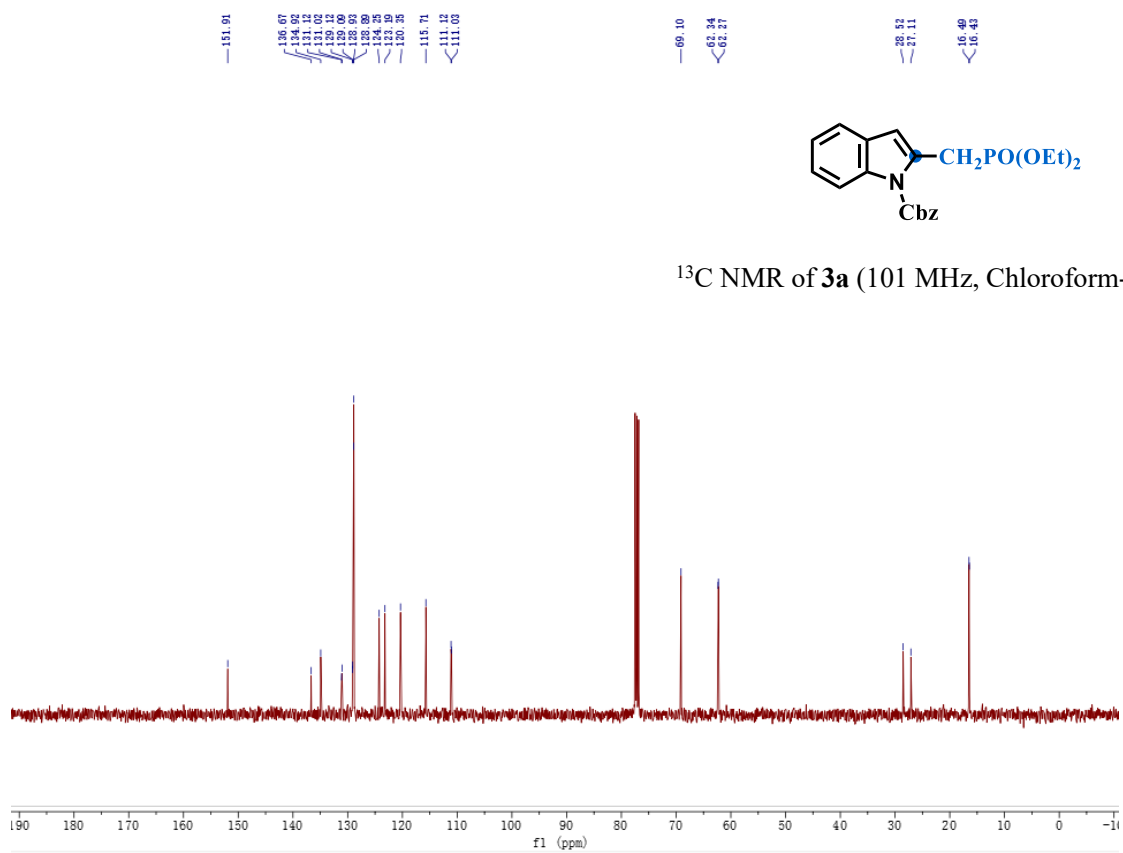

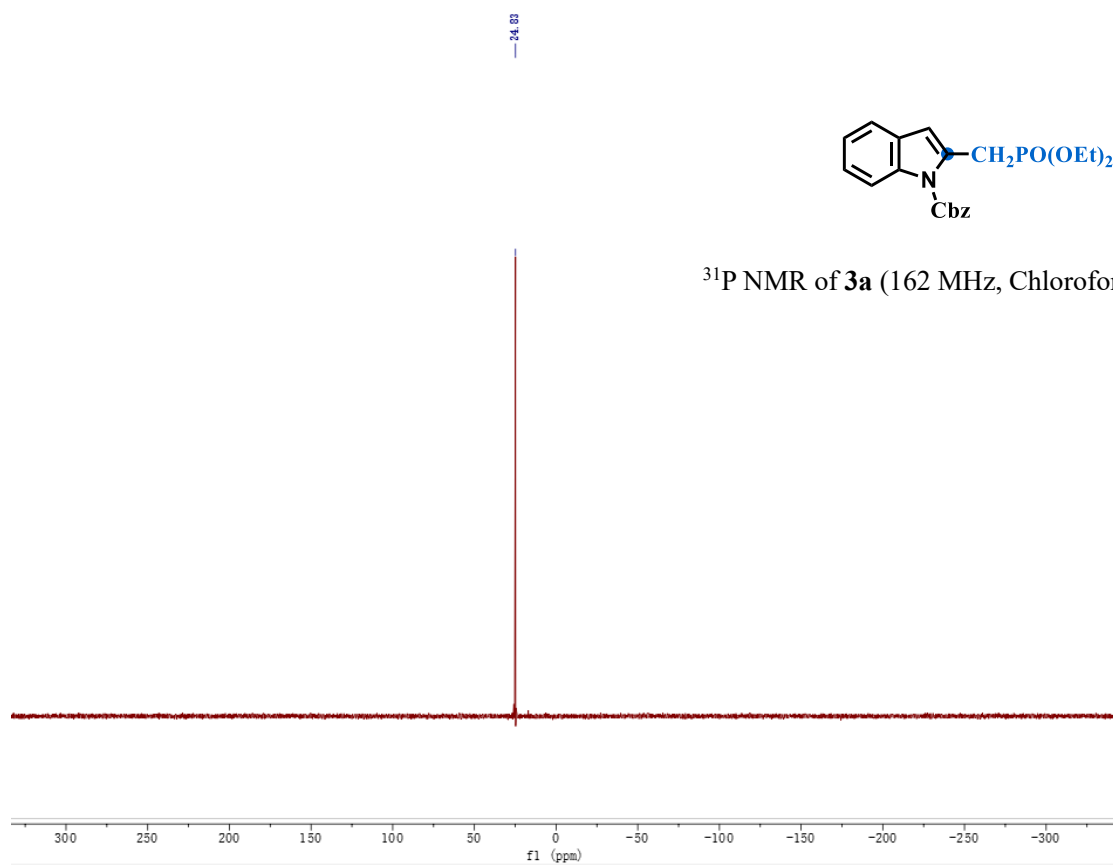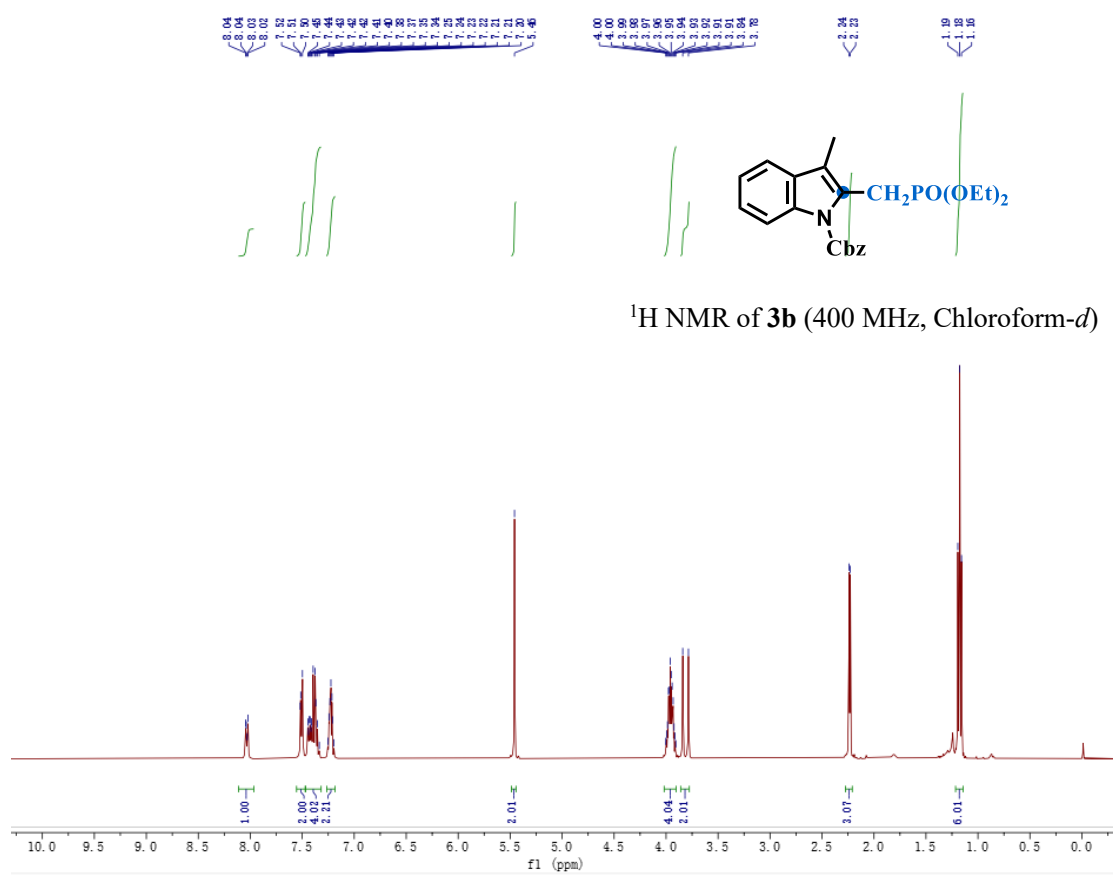

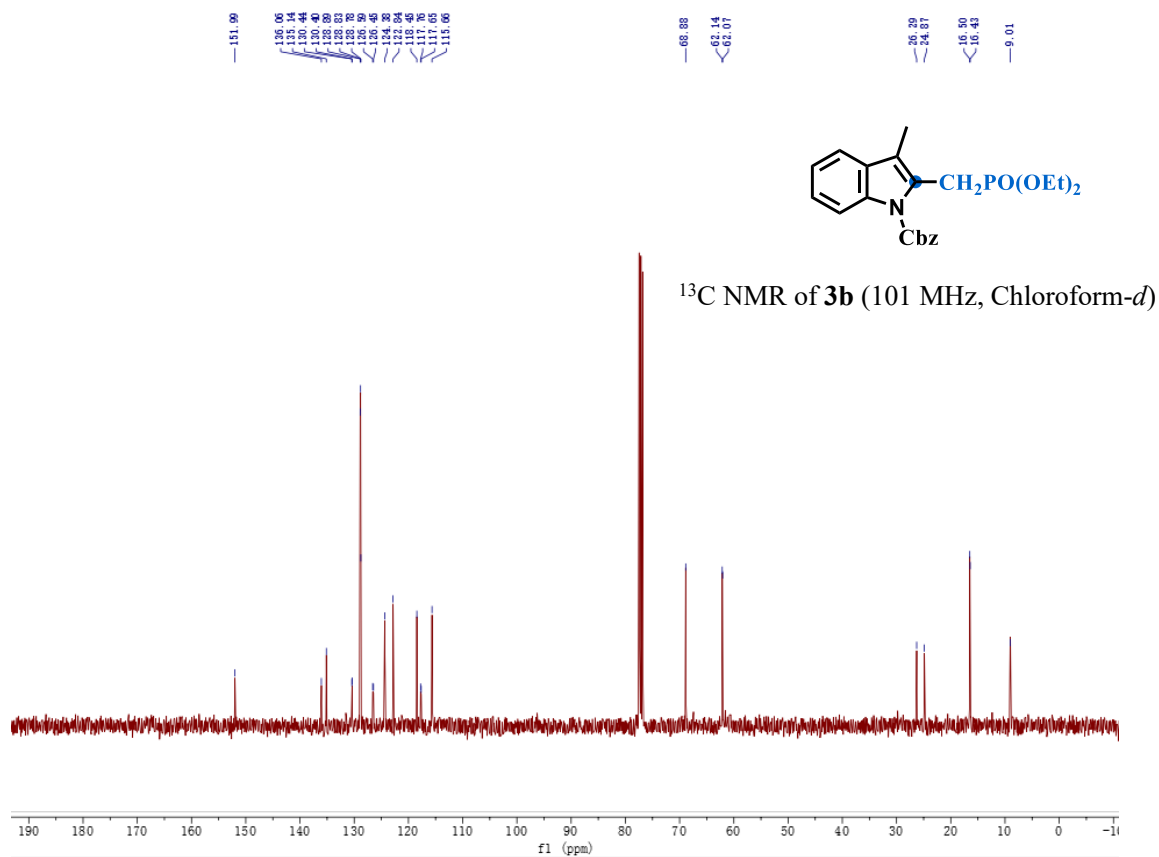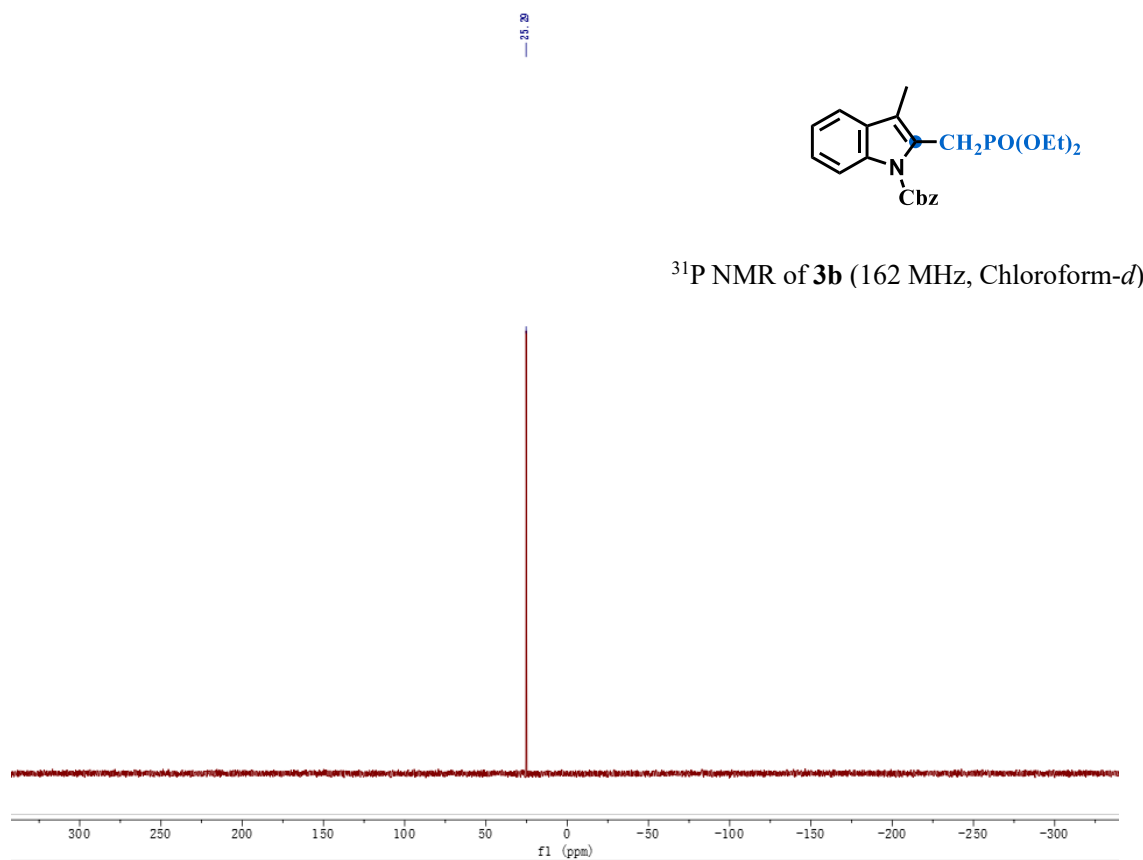

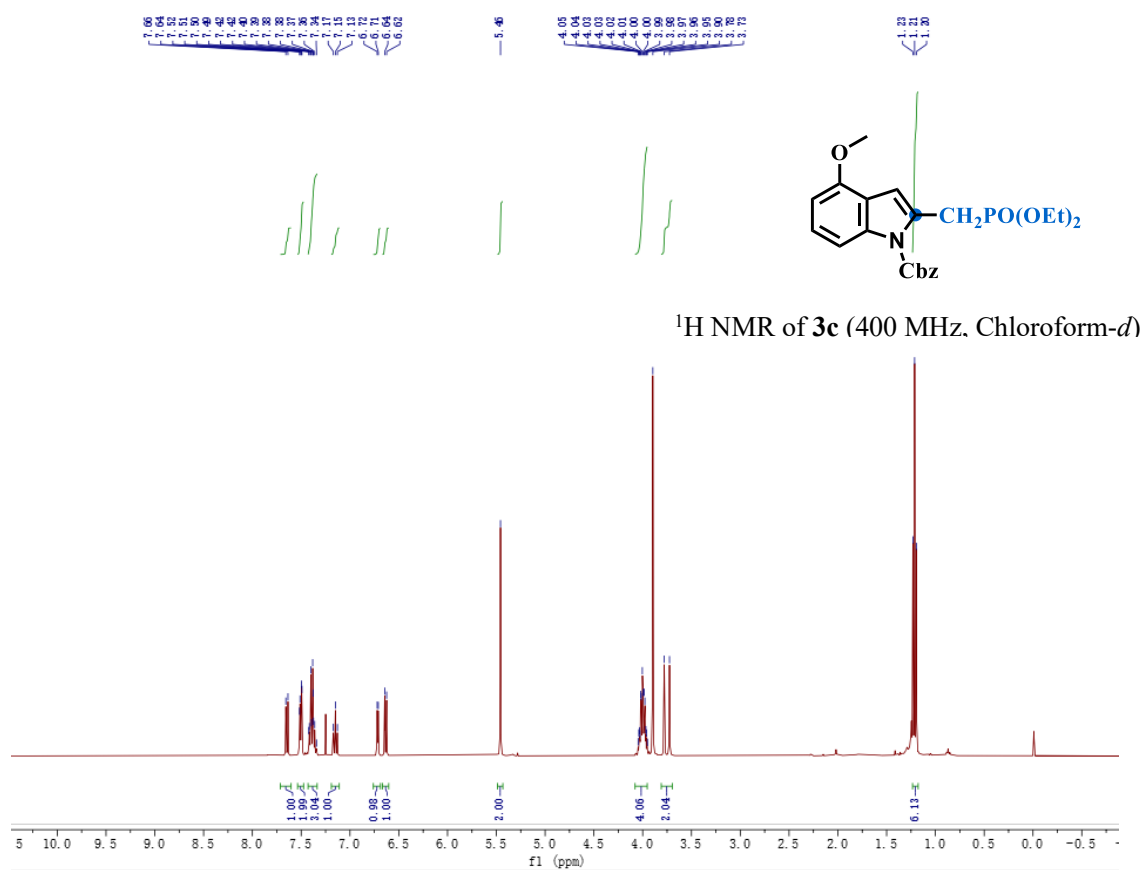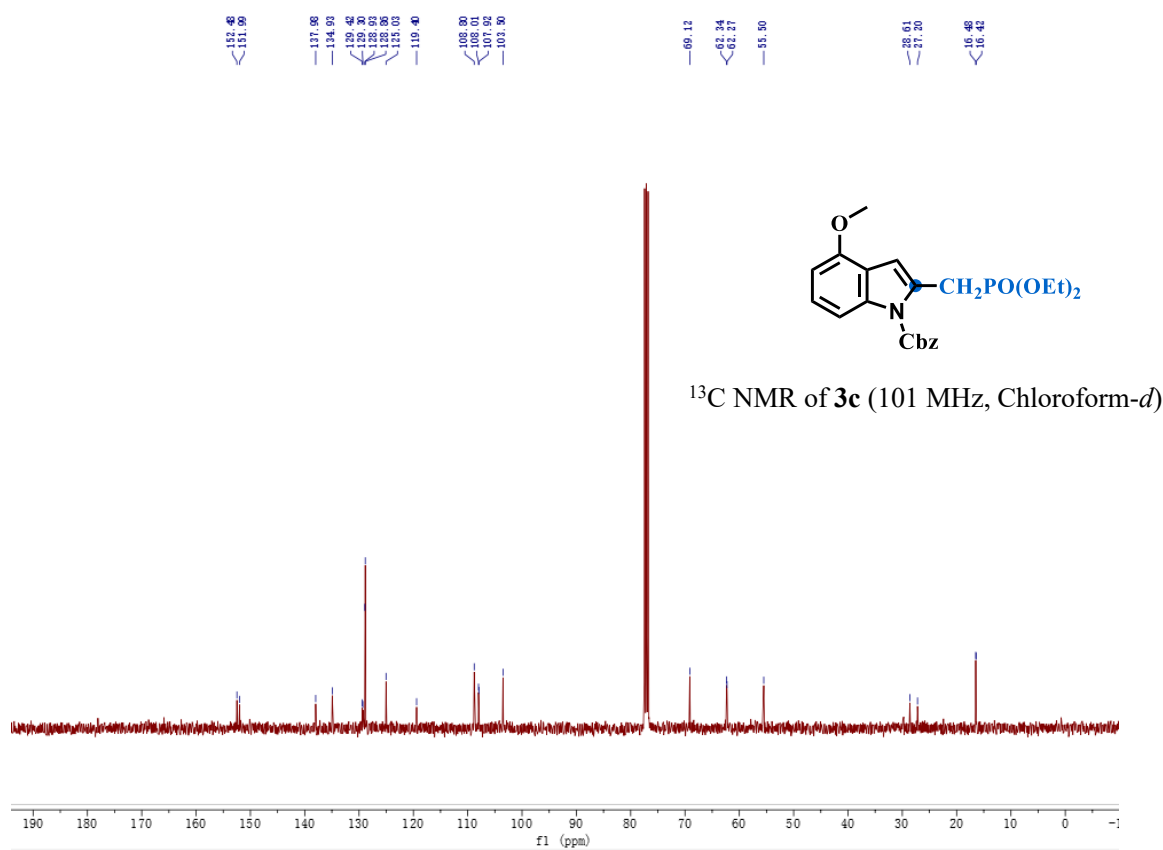

-24.80

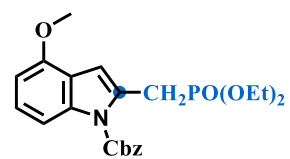

$^{31}\text{P}$  NMR of **3c** (162 MHz, Chloroform-*d*)

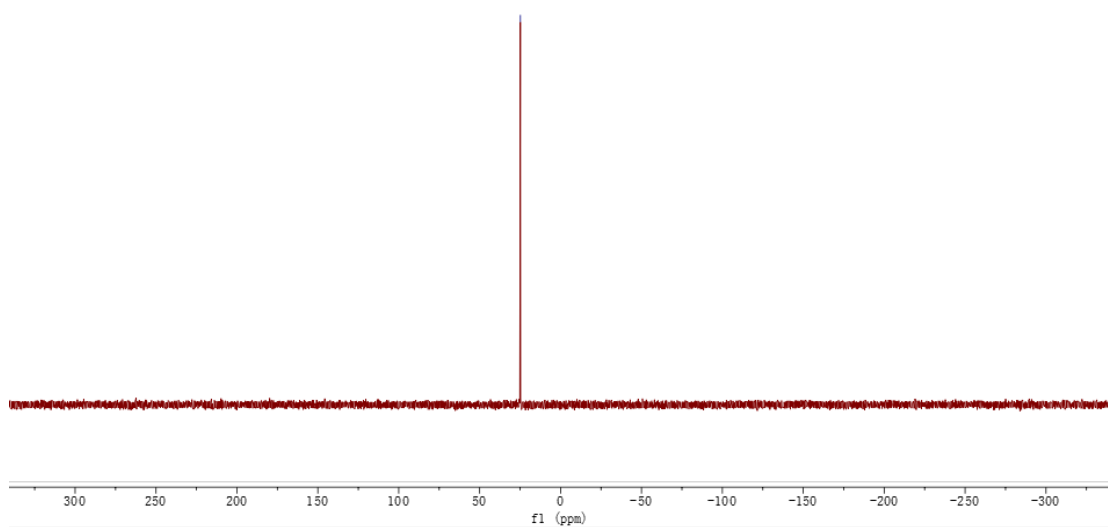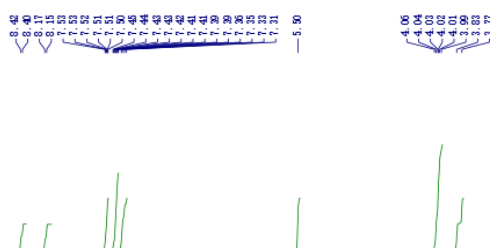

$^1\text{H}$  NMR of **3d** (400 MHz, Chloroform-*d*)

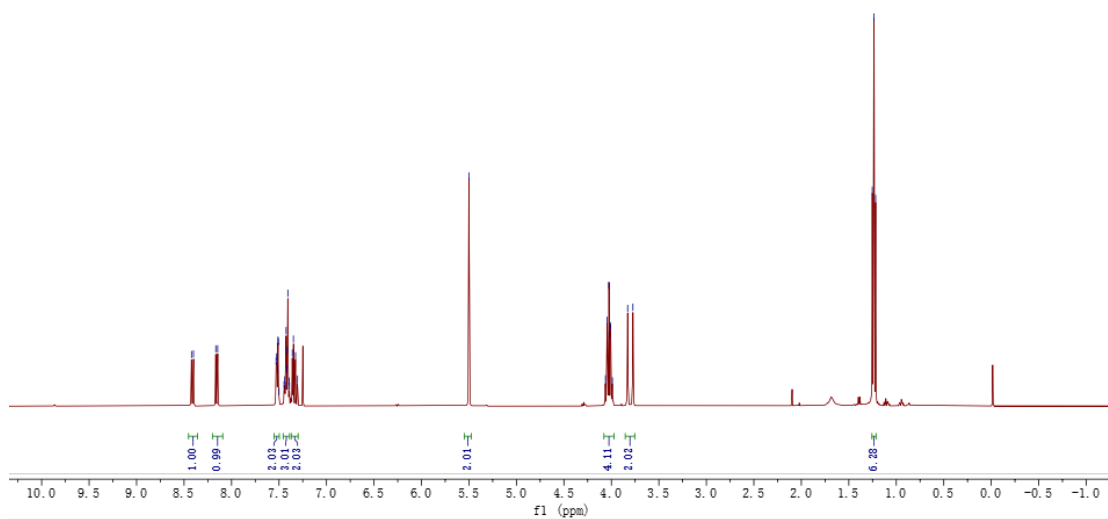



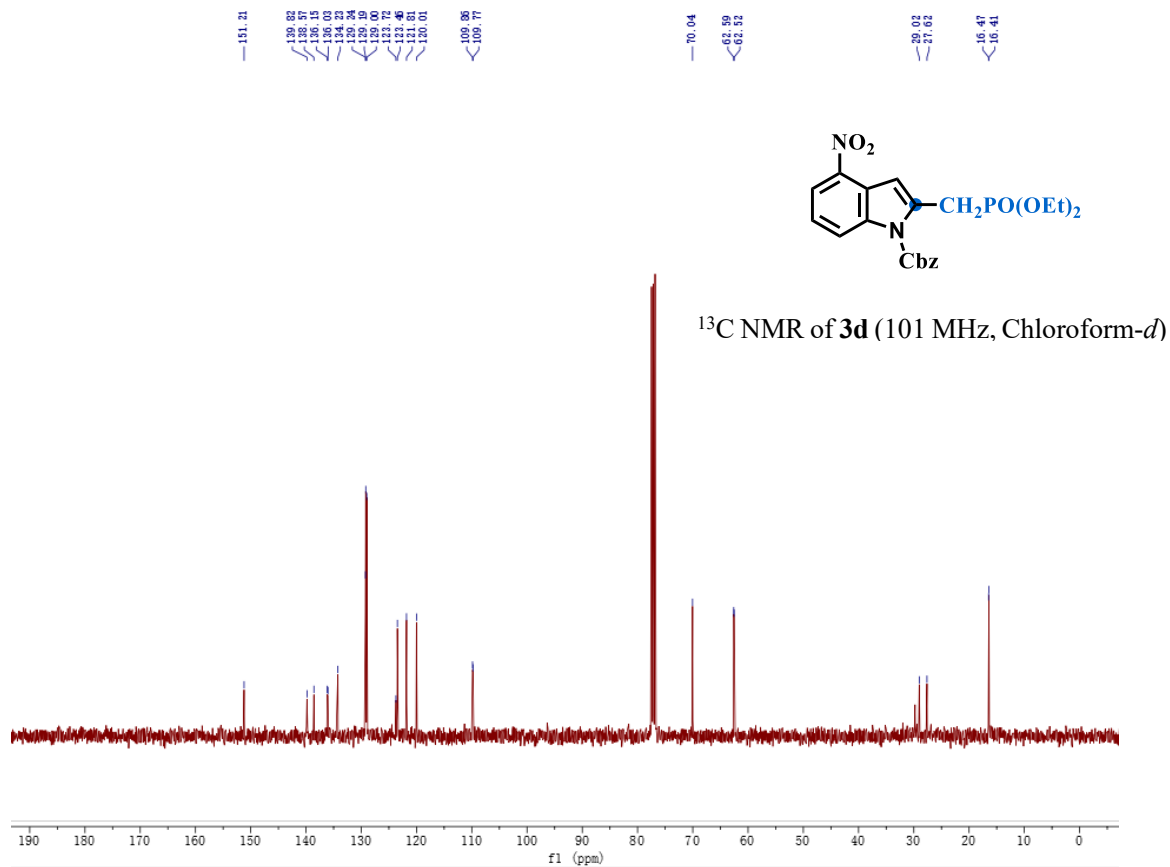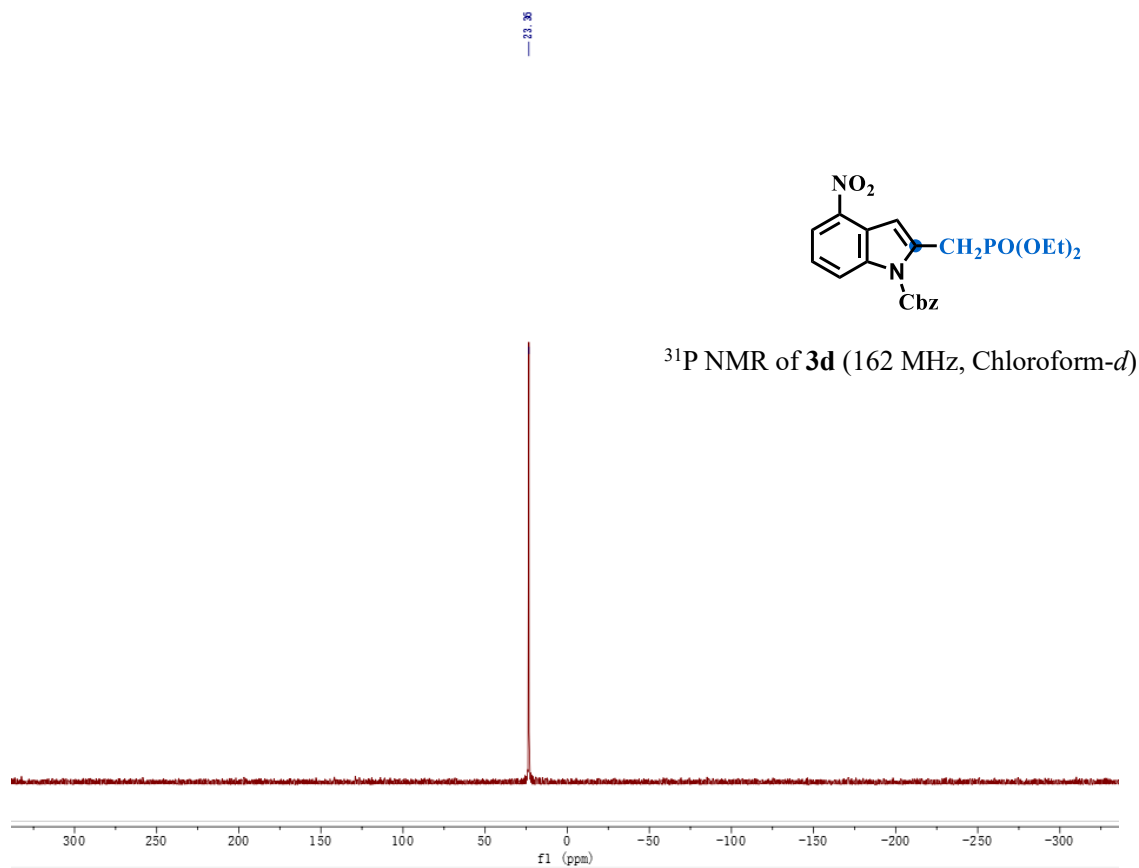

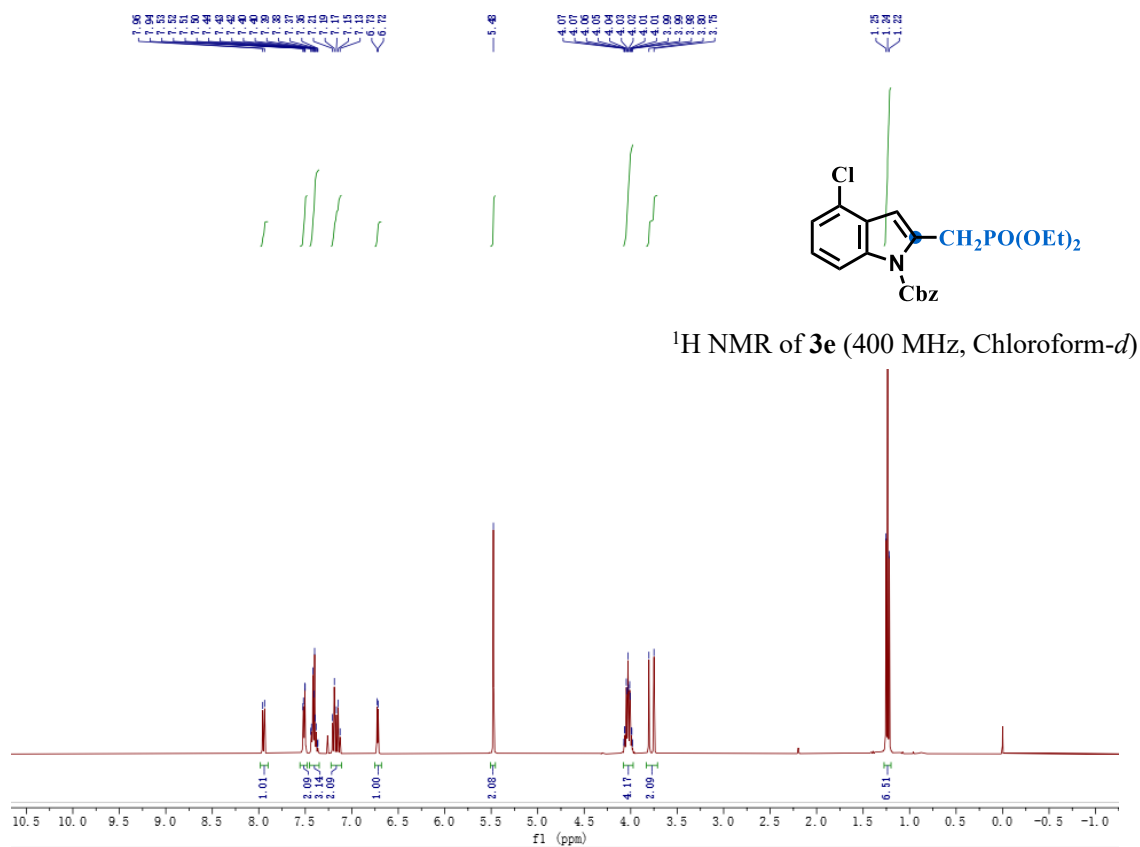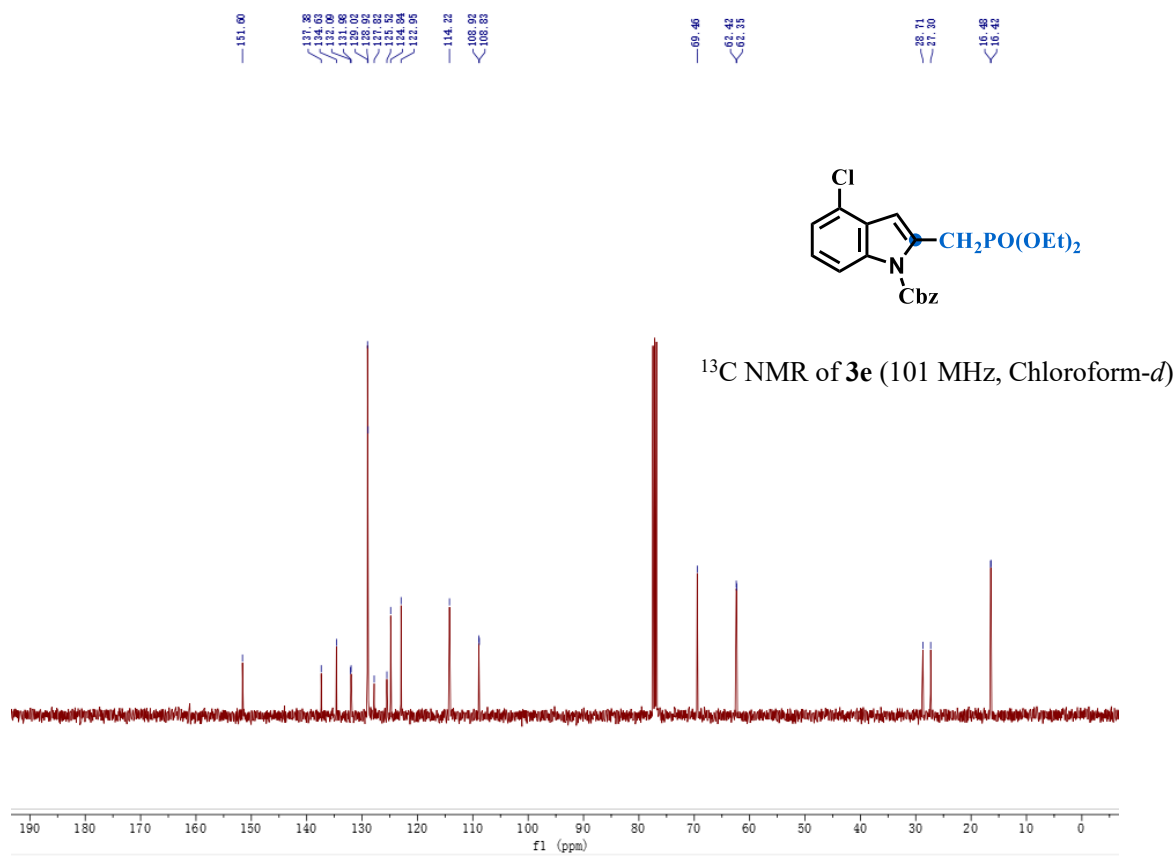

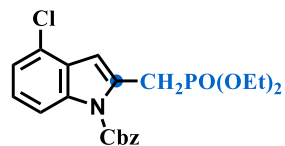

$^{31}\text{P}$  NMR of **3e** (162 MHz, Chloroform-*d*)

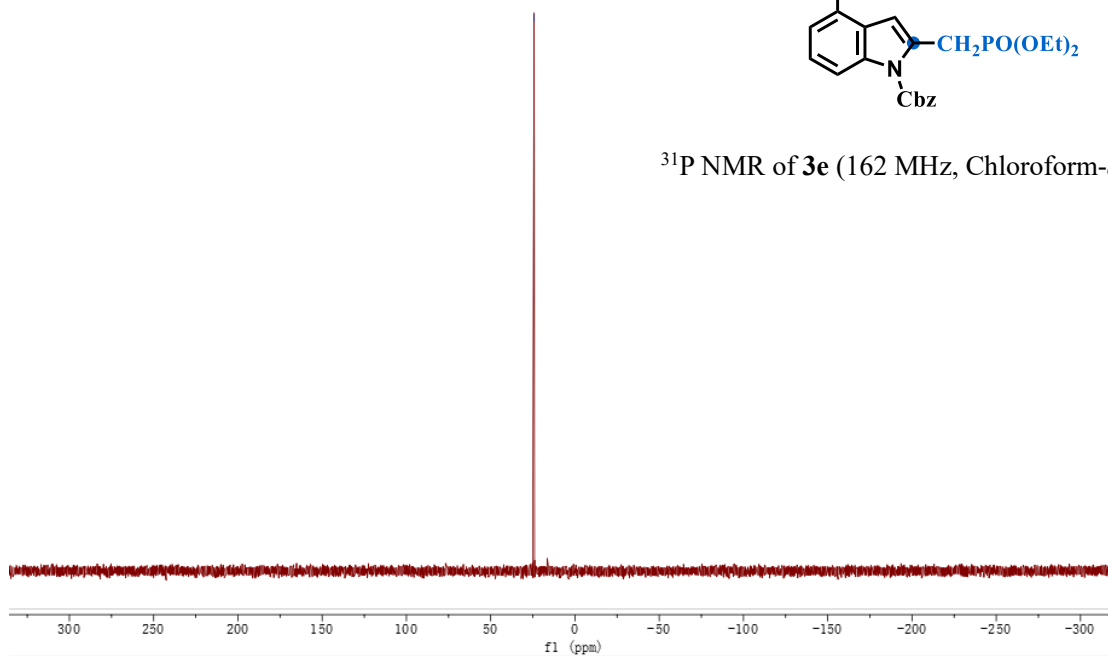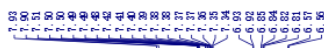

1.48

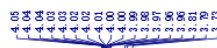

6.29

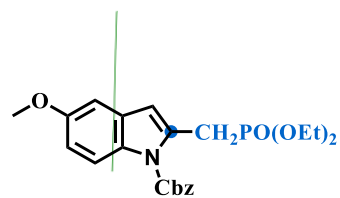

$^1\text{H}$  NMR of **3f** (400 MHz, Chloroform-*d*)

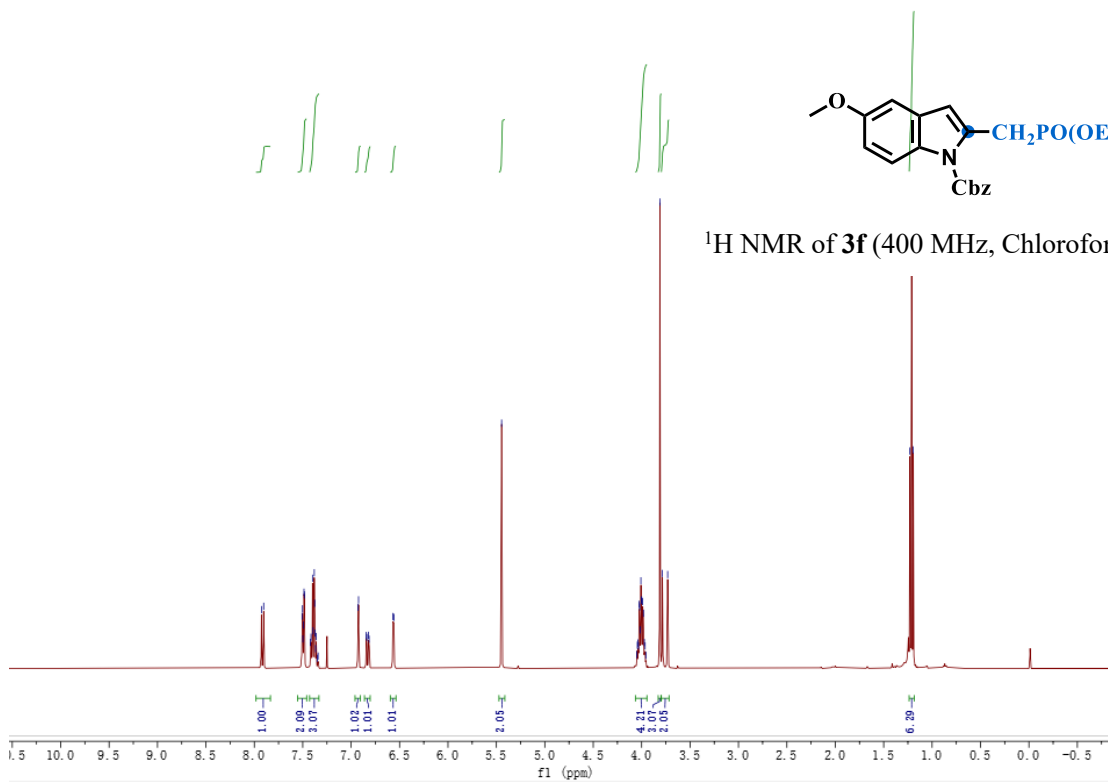

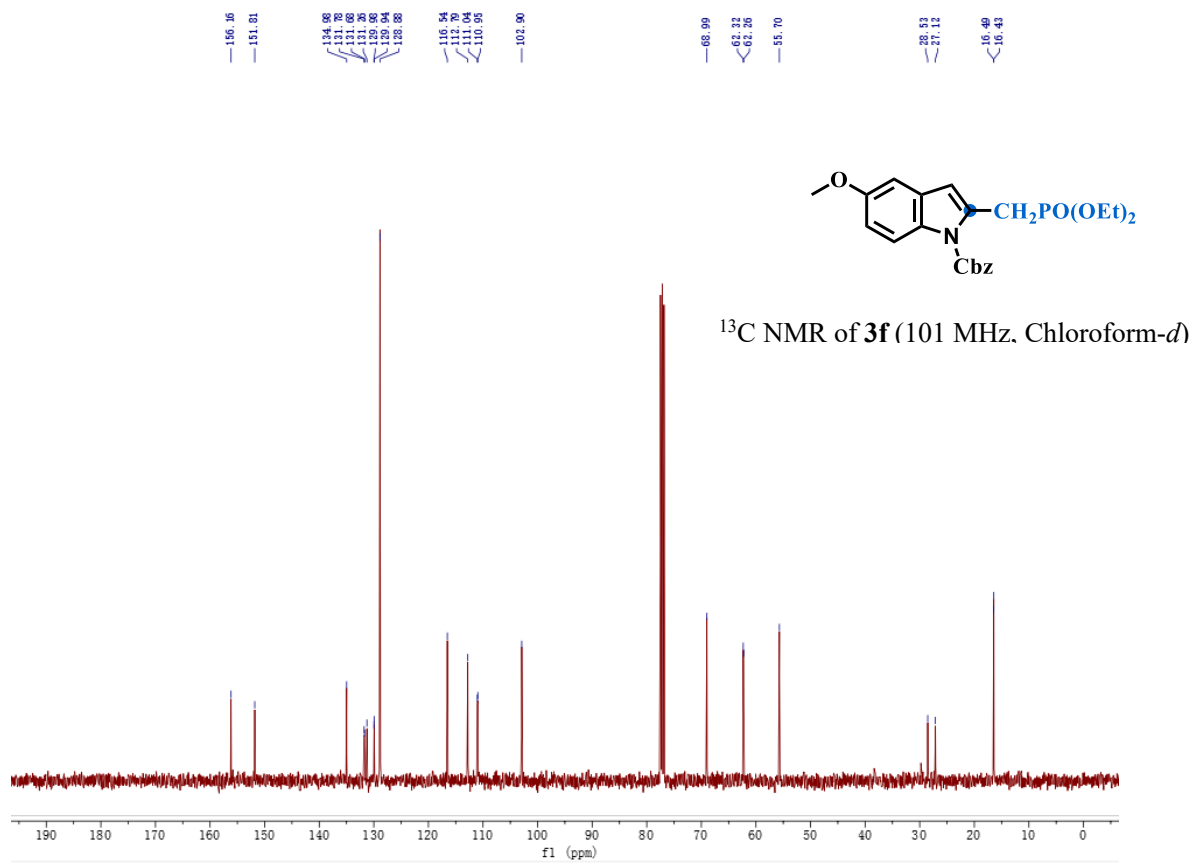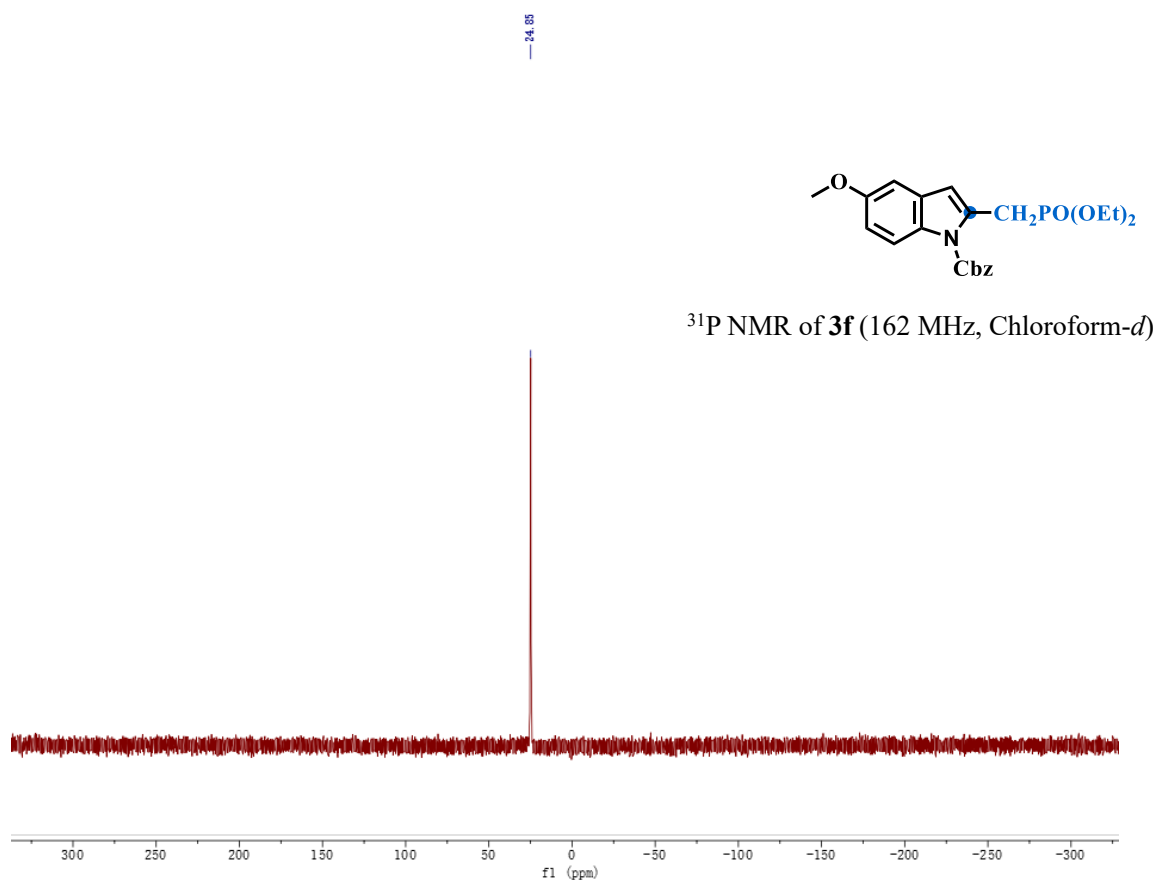

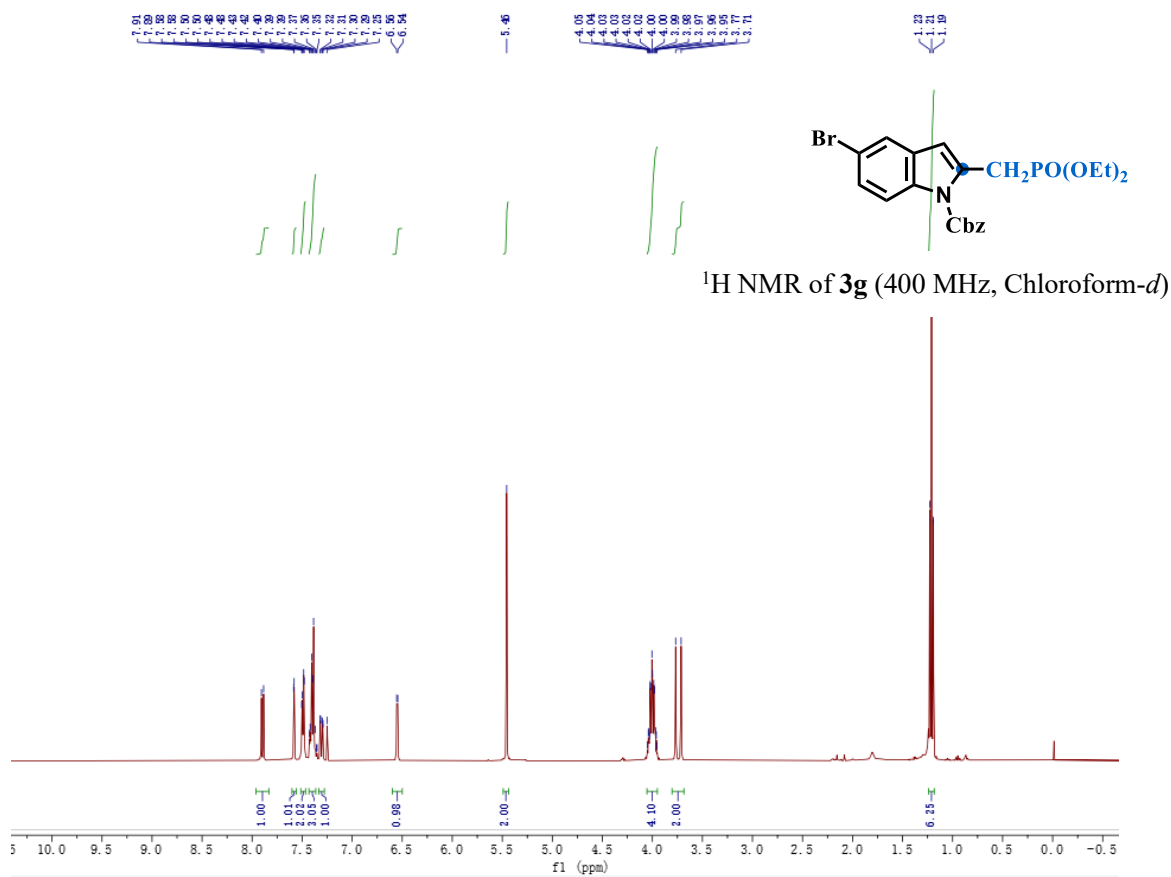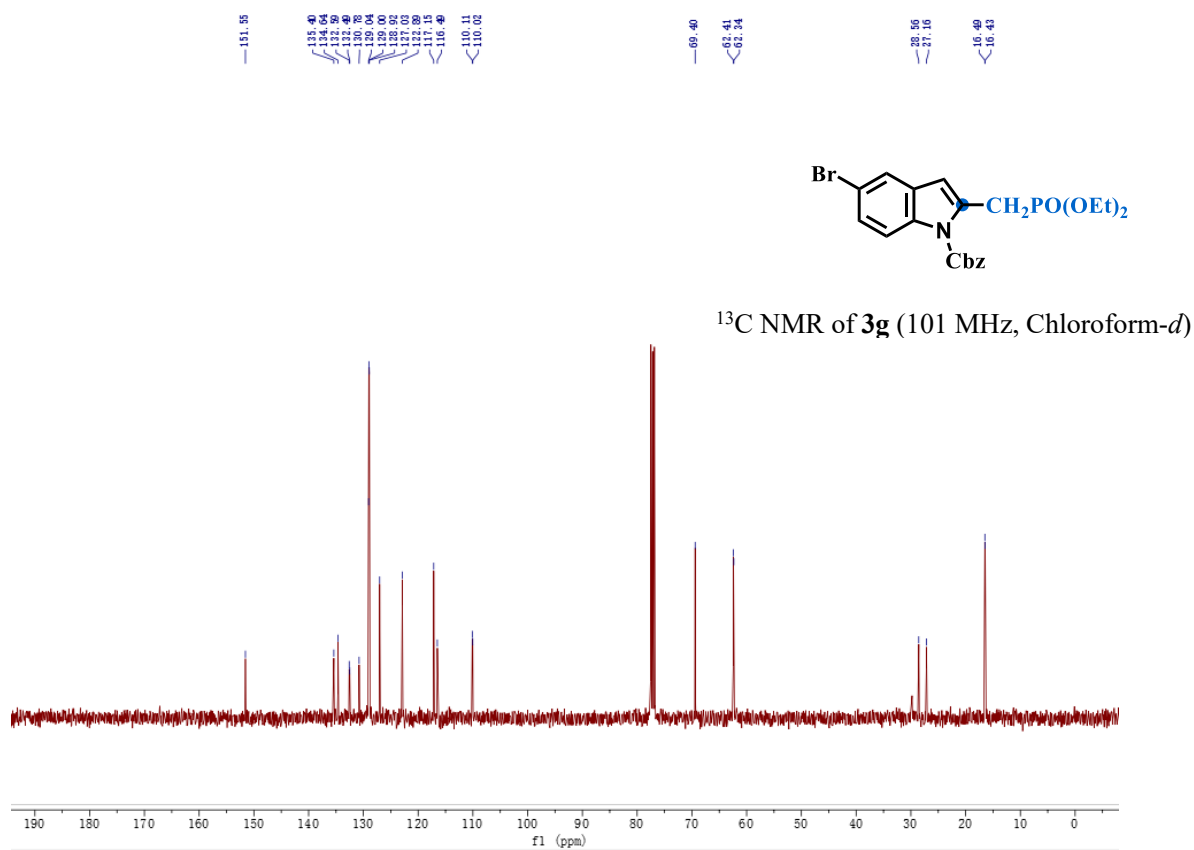

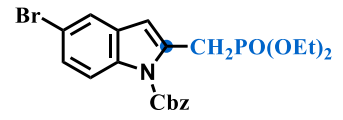

<sup>31</sup>P NMR of **3g** (162 MHz, Chloroform-*d*)

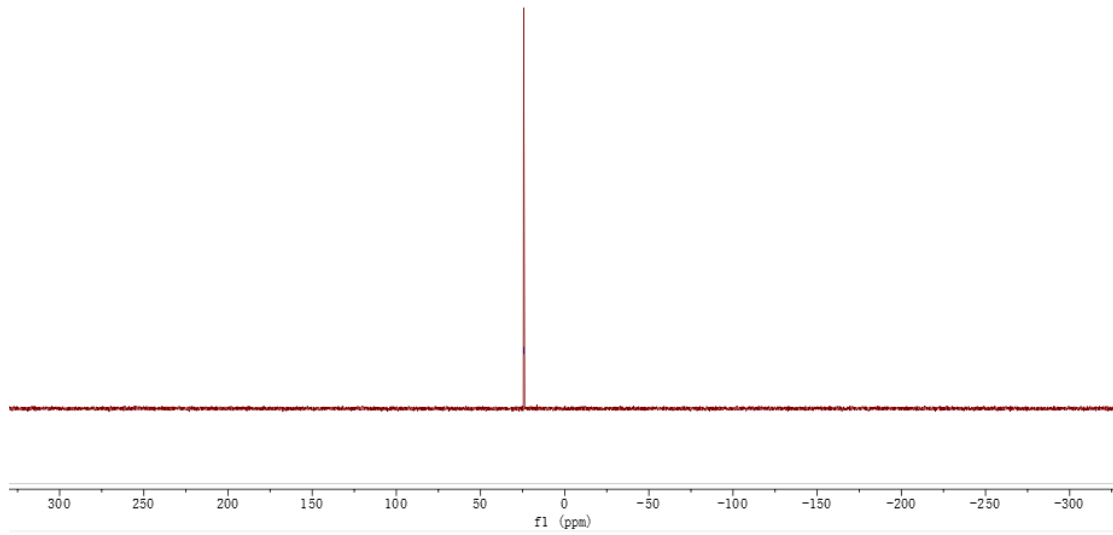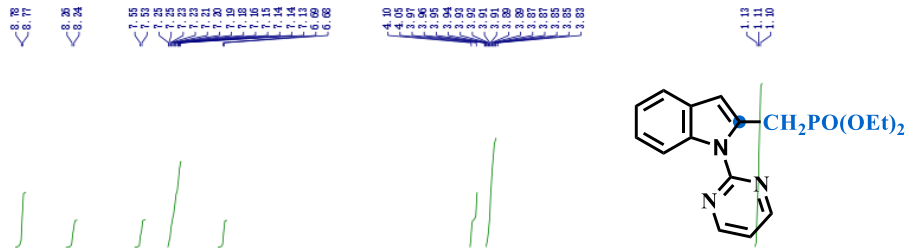

<sup>1</sup>H NMR of **3h** (400 MHz, Chloroform-*d*)

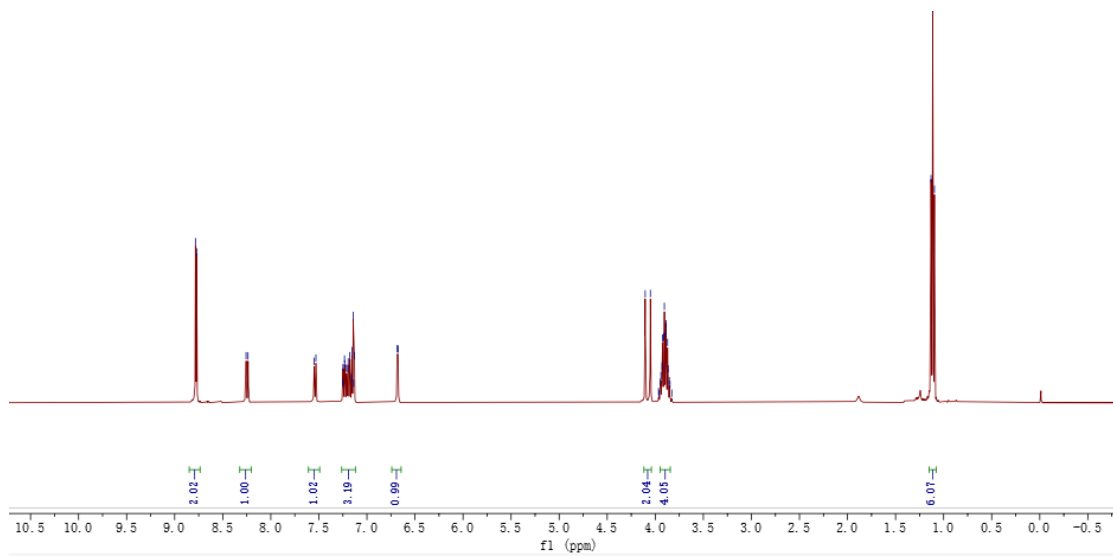

158.20  
137.25  
130.51  
128.94  
128.90  
122.22  
122.05  
119.17  
113.96  
109.00  
109.00  
62.10  
62.02  
28.14  
28.14  
16.20  
16.22

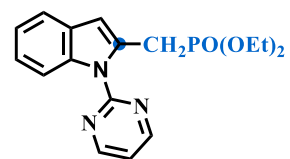

$^{13}\text{C}$  NMR of **3h** (101 MHz, Chloroform-*d*)

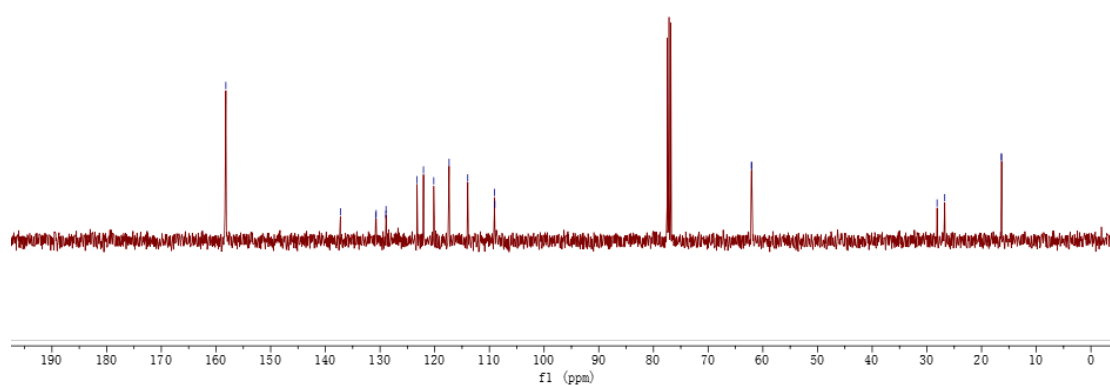

28.22

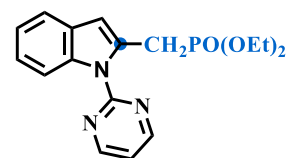

$^{31}\text{P}$  NMR of **3h** (162 MHz, Chloroform-*d*)

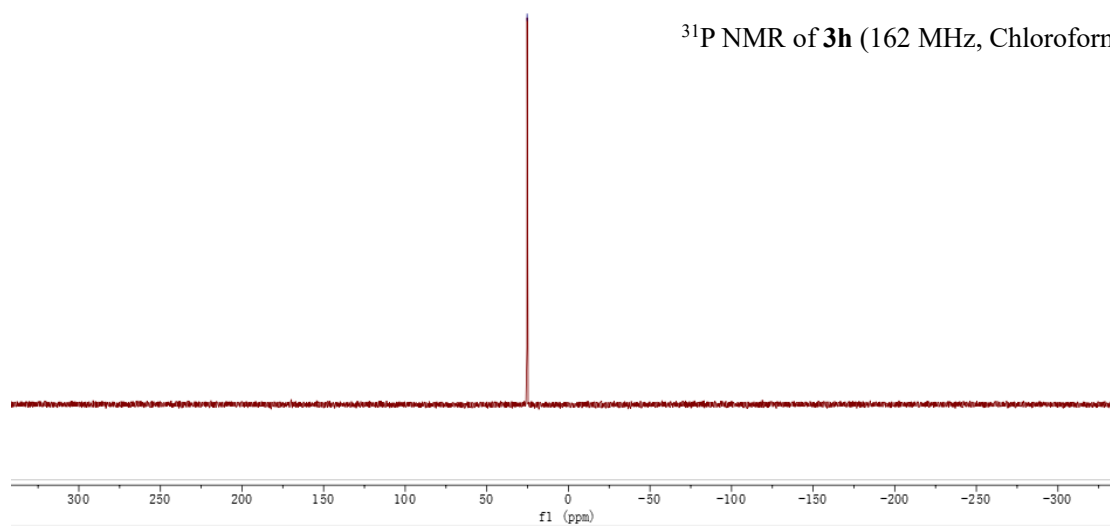

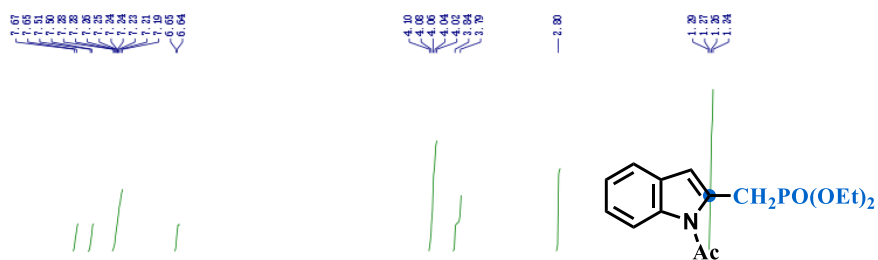

<sup>1</sup>H NMR of **3i** (400 MHz, Chloroform-*d*)

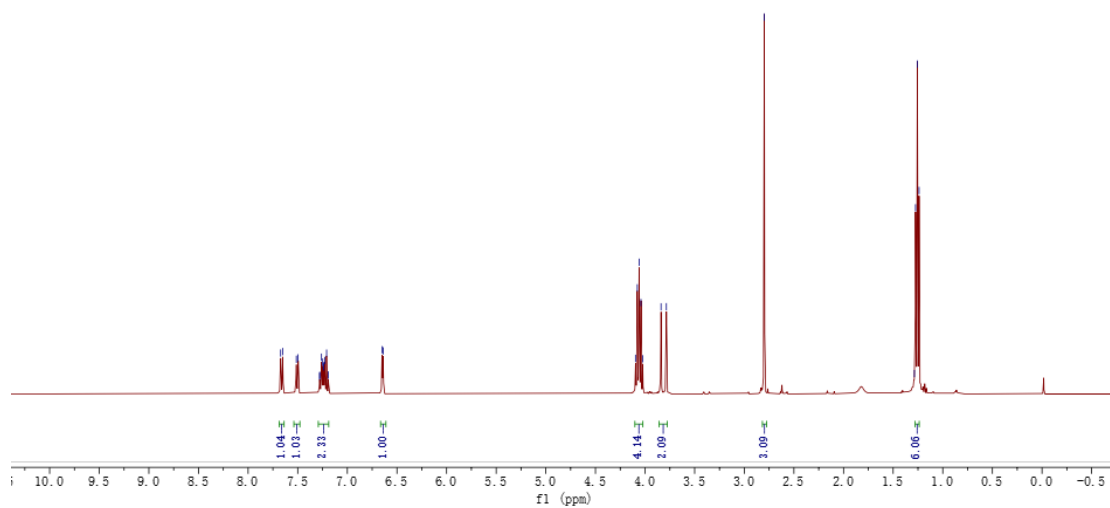

<sup>13</sup>C NMR of **3i** (101 MHz, Chloroform-*d*)

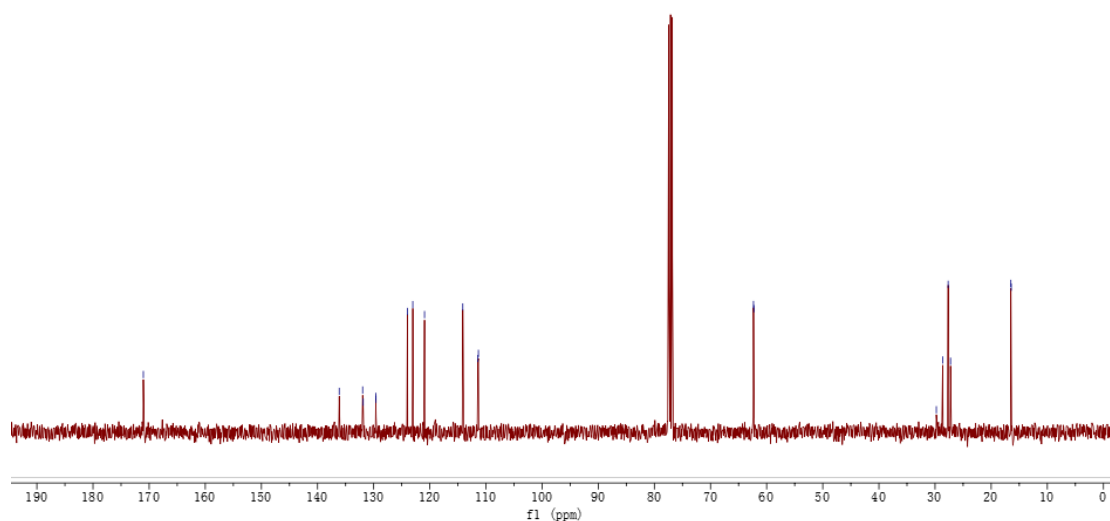





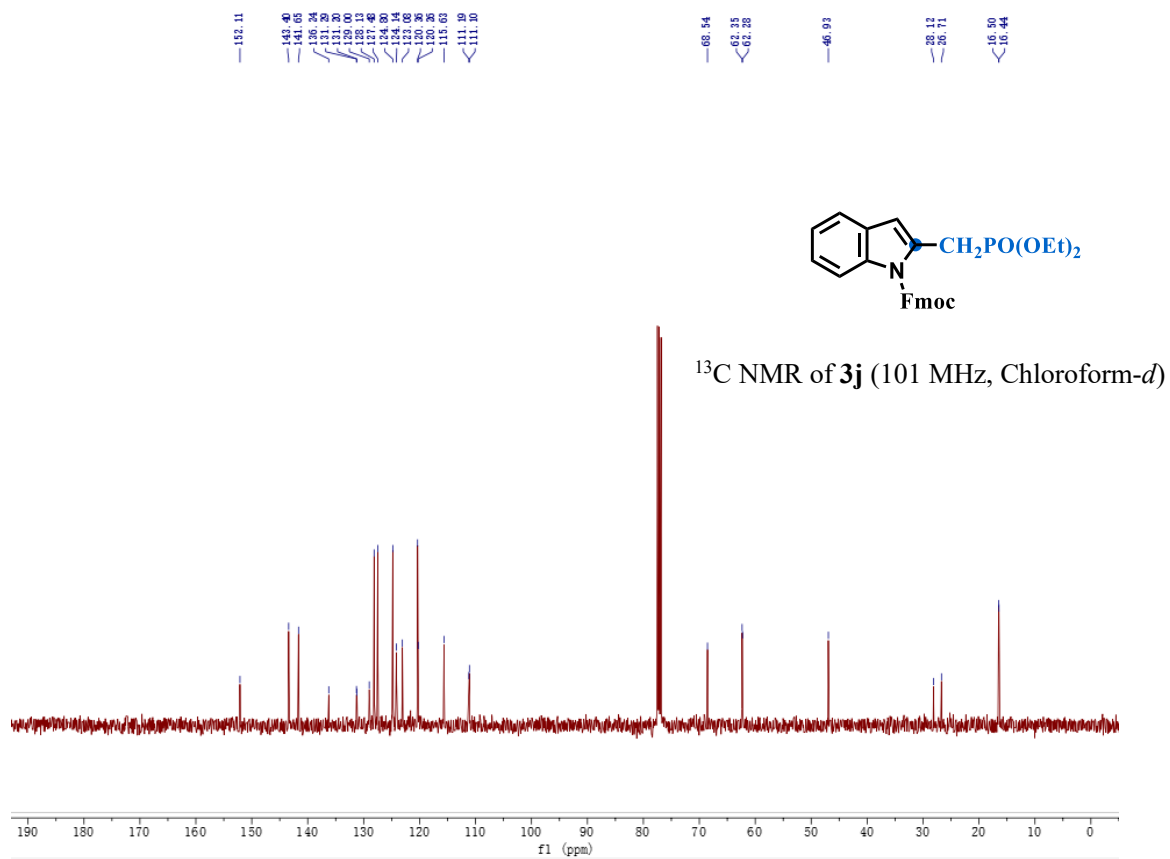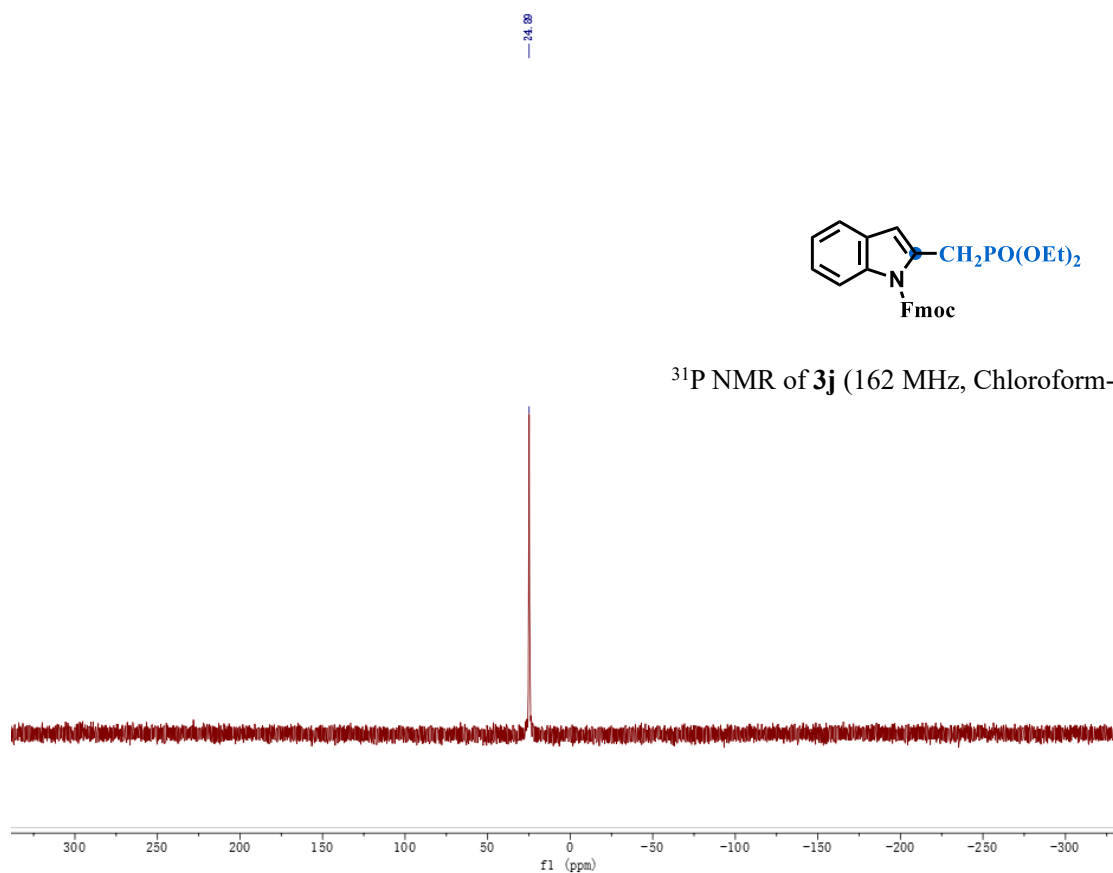

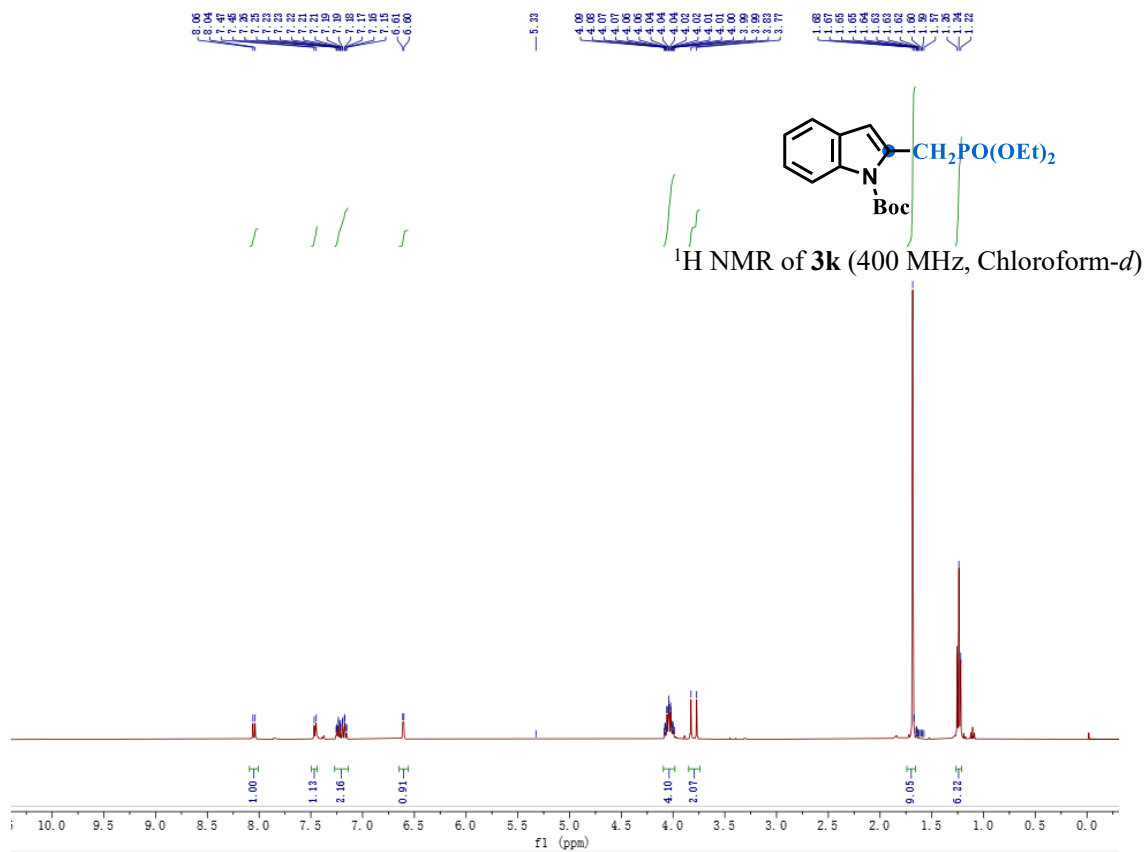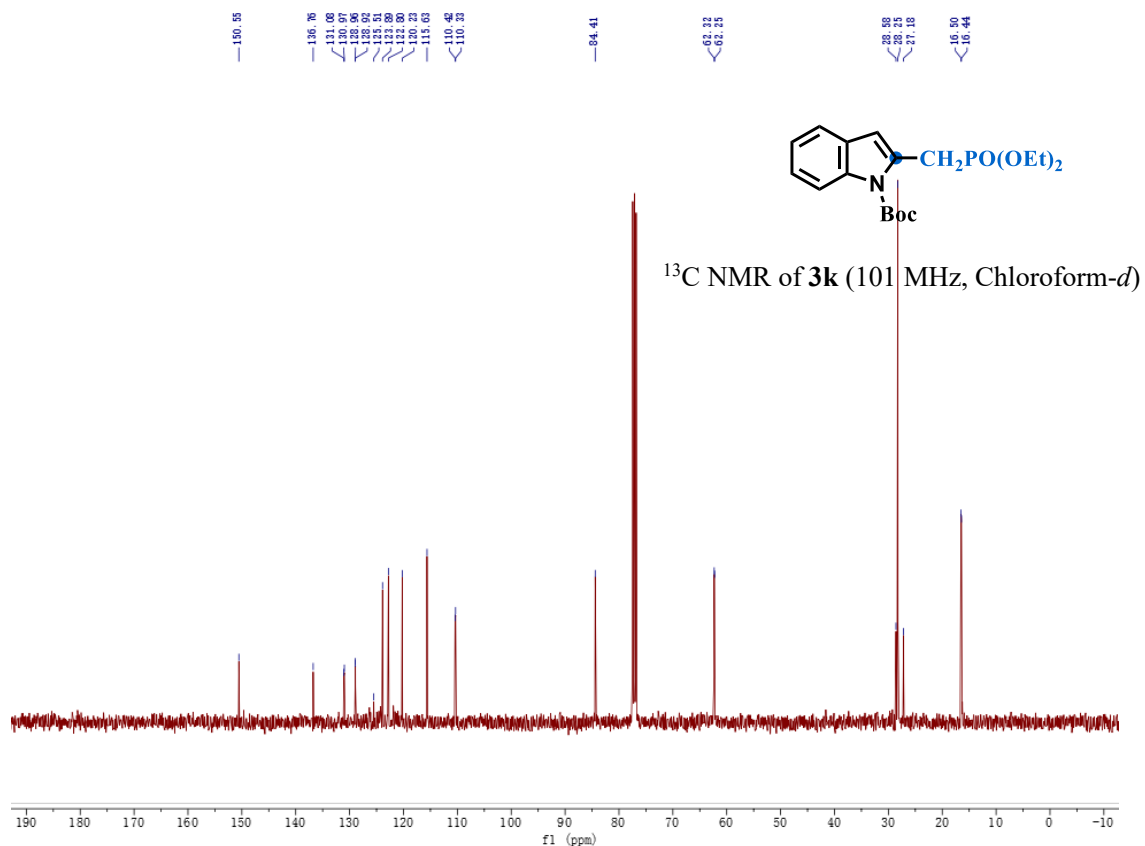

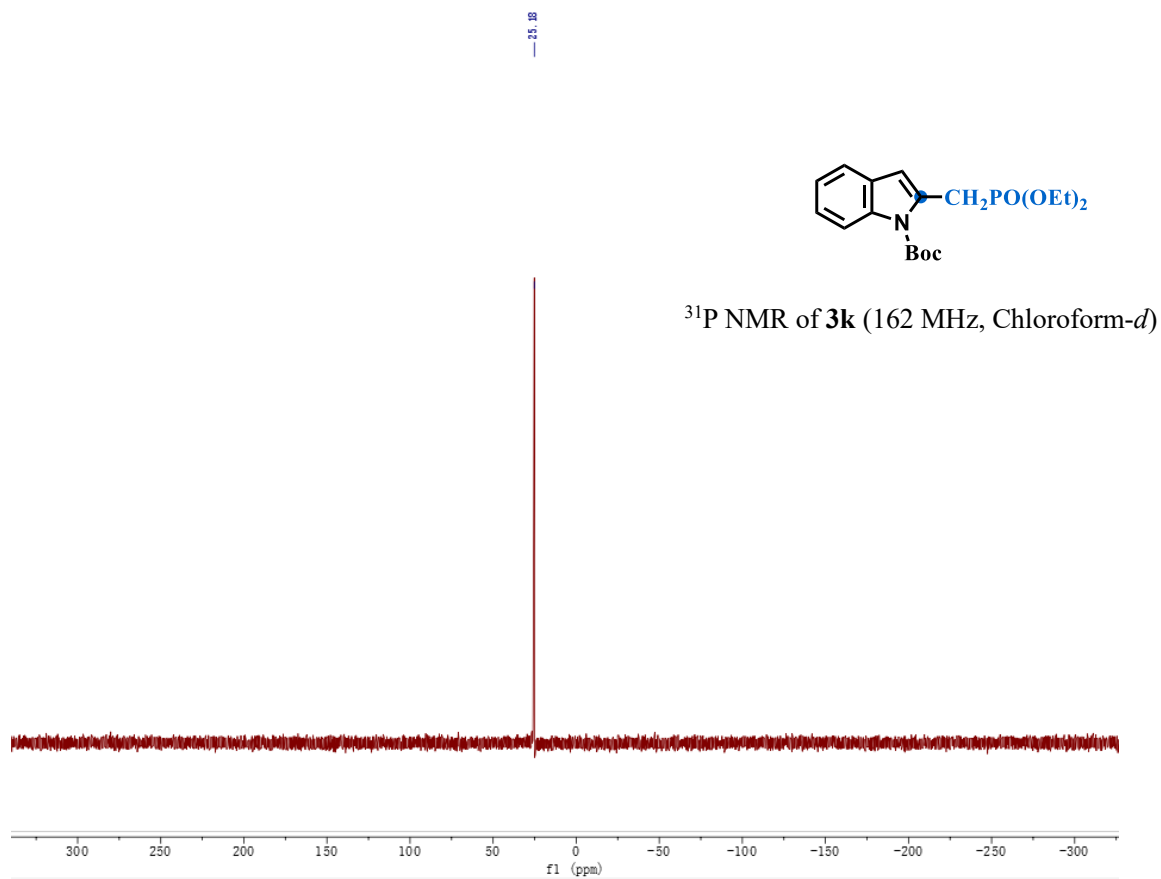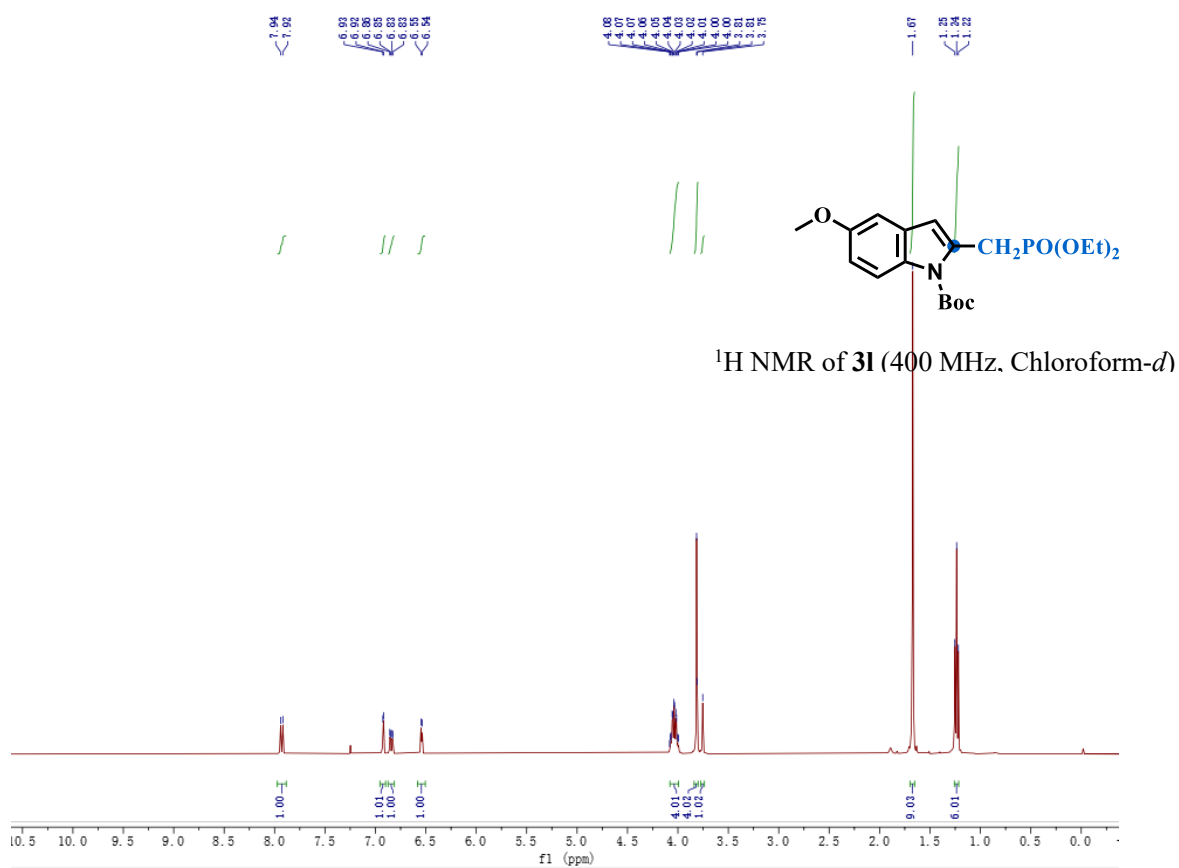

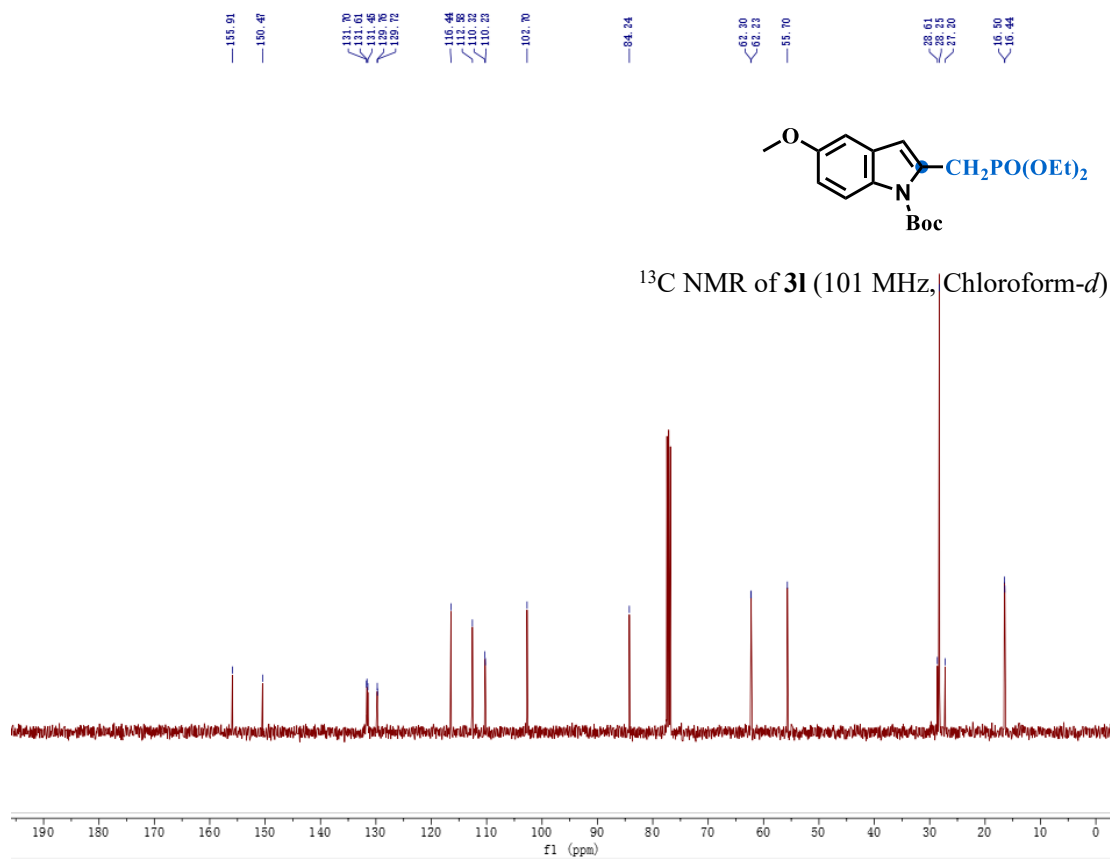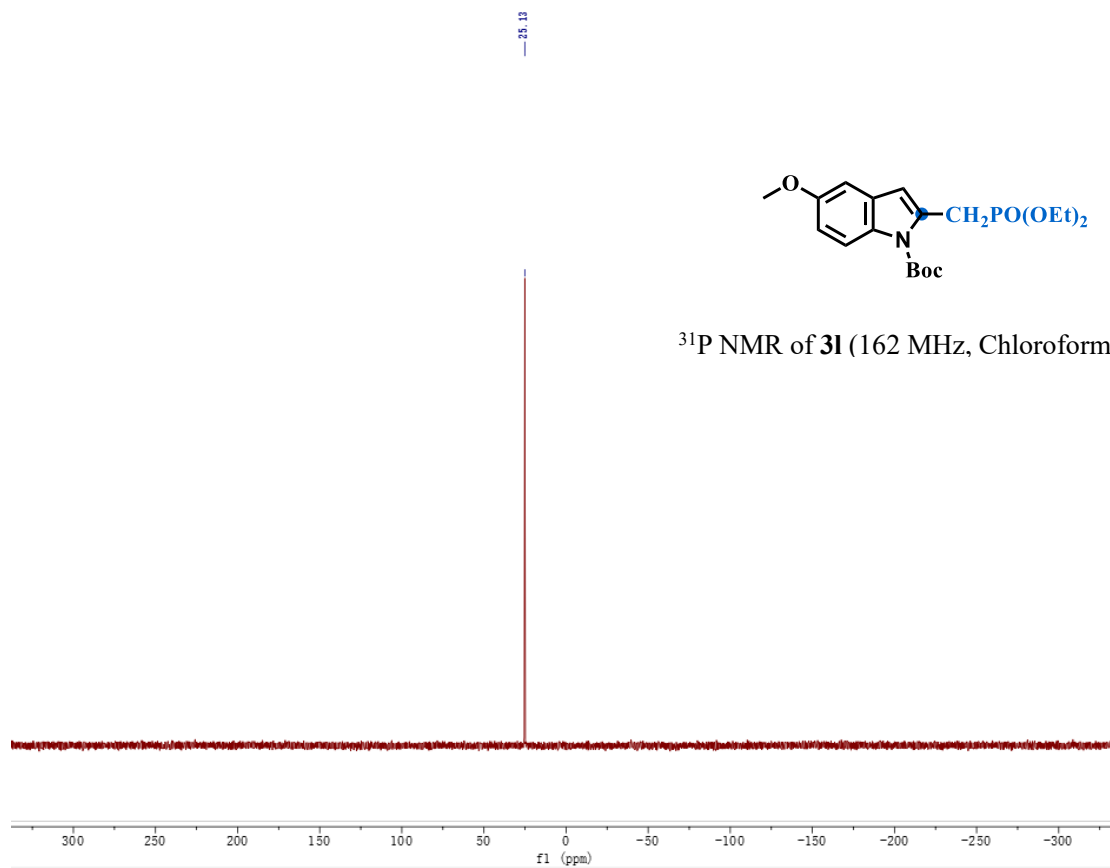

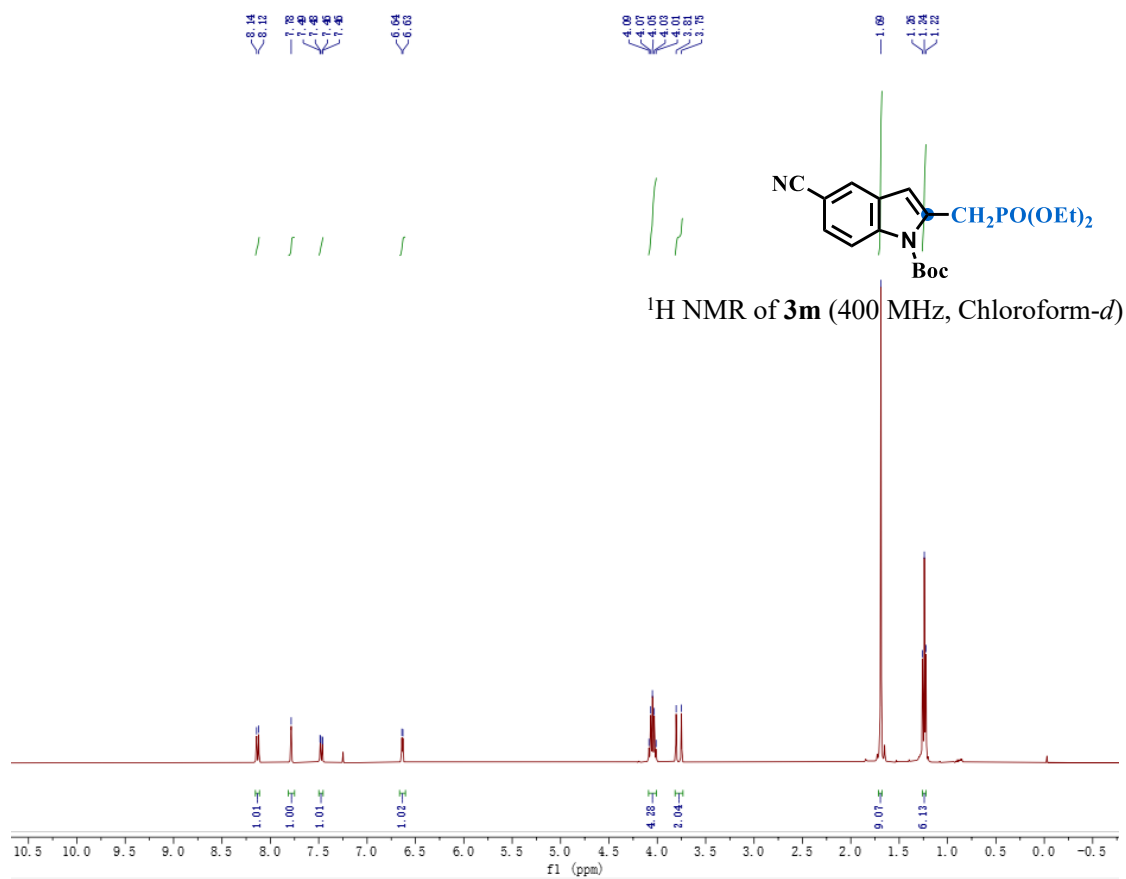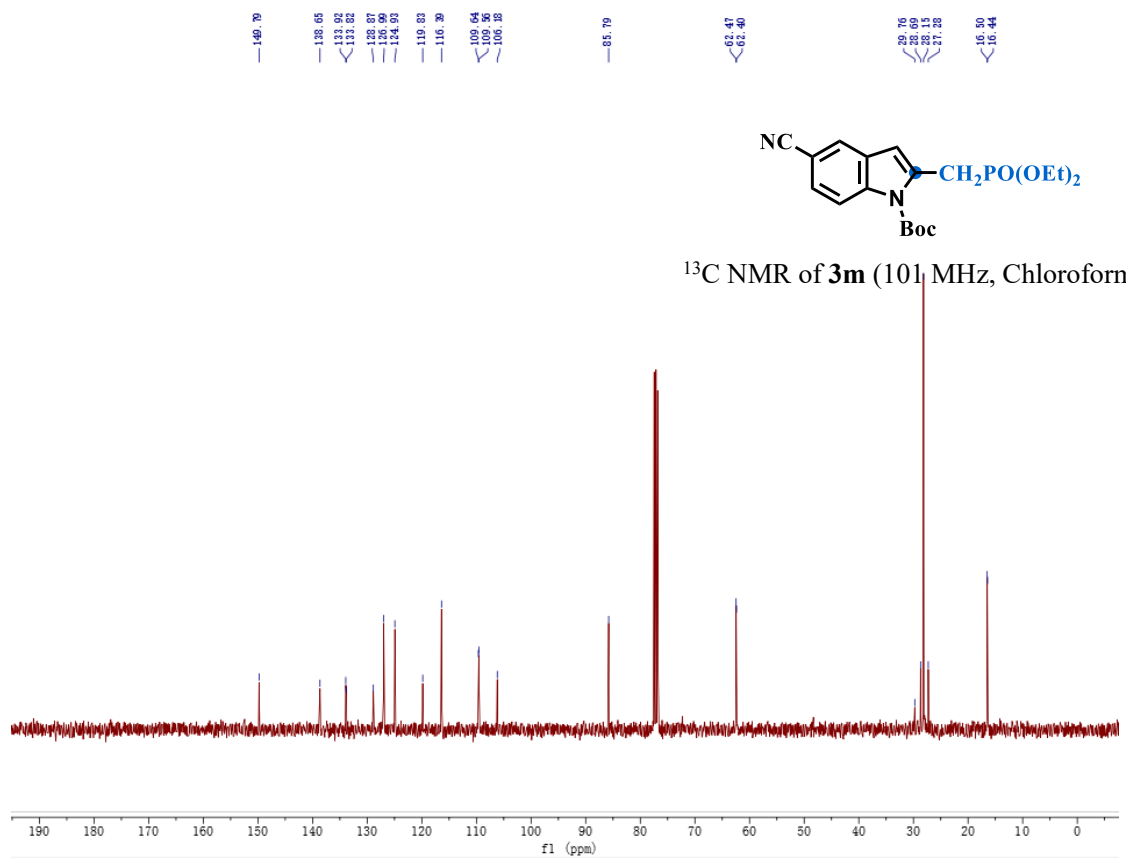

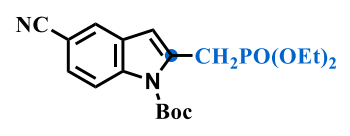

<sup>31</sup>P NMR of **3m** (162 MHz, Chloroform-*d*)

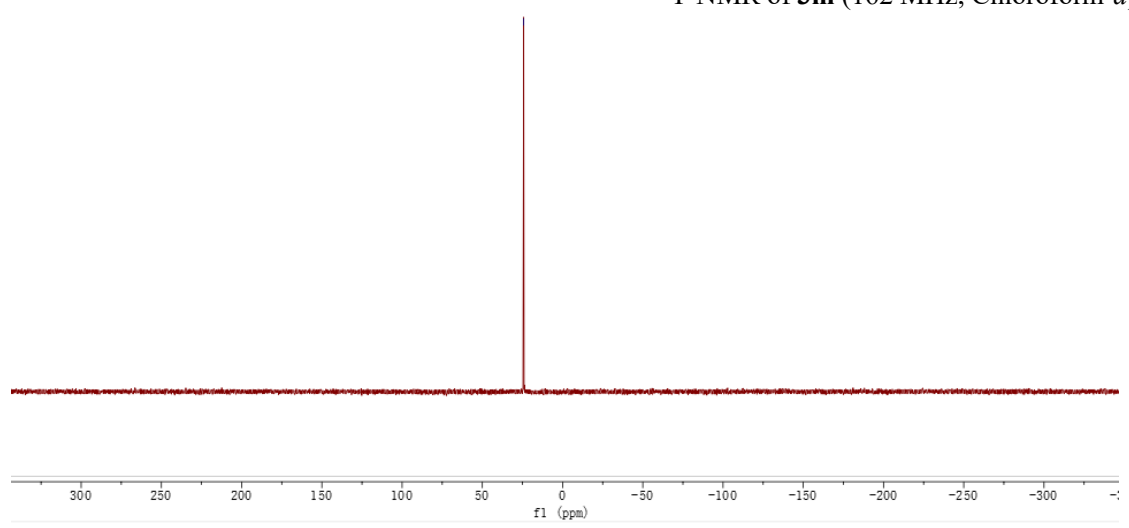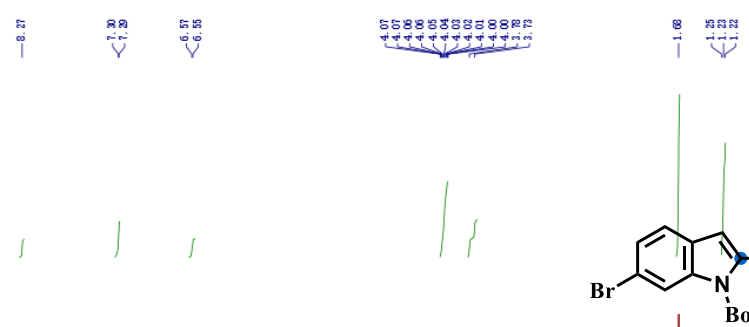

<sup>1</sup>H NMR of **3n** (400 MHz, Chloroform-*d*)

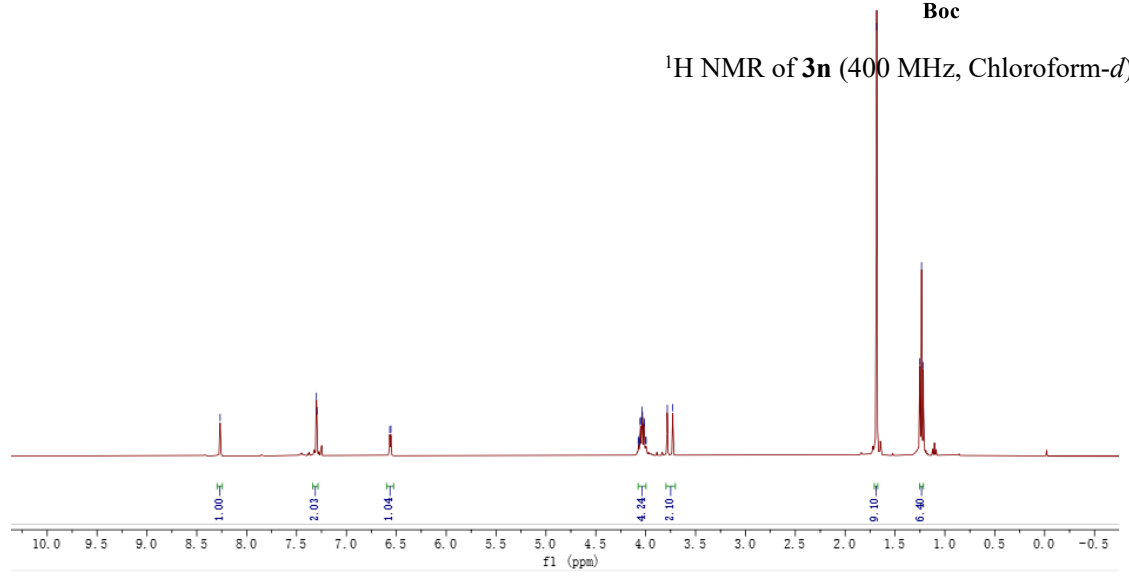

150.08  
137.45  
131.20  
127.72  
127.70  
126.03  
118.52  
117.00  
110.04  
109.95  
85.10  
62.38  
62.31  
28.05  
27.24  
16.51  
16.45

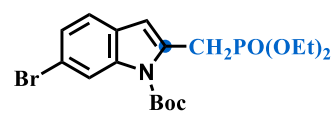

$^{13}\text{C}$  NMR of **3n** (101 MHz, Chloroform-*d*)

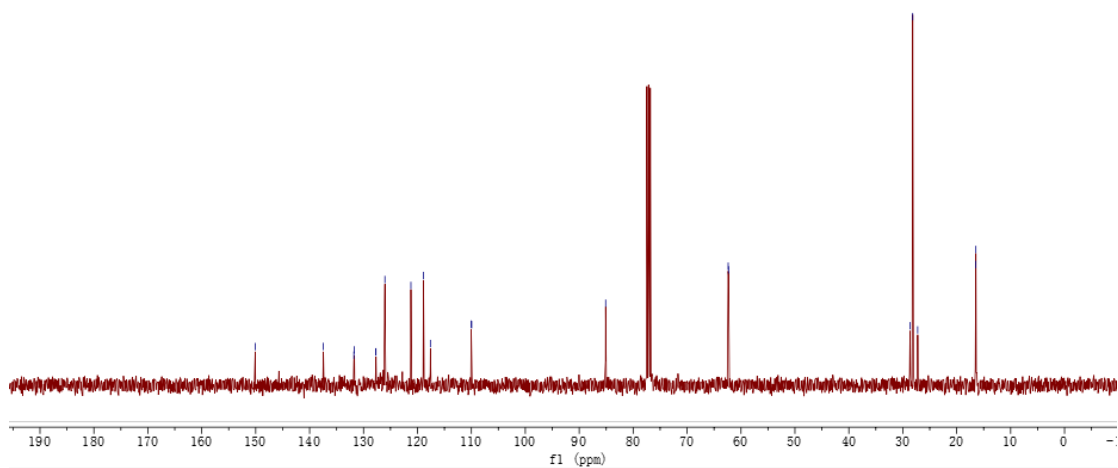

24.04

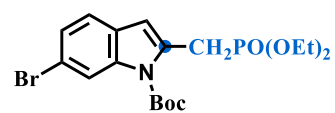

$^{31}\text{P}$  NMR of **3n** (162 MHz, Chloroform-*d*)

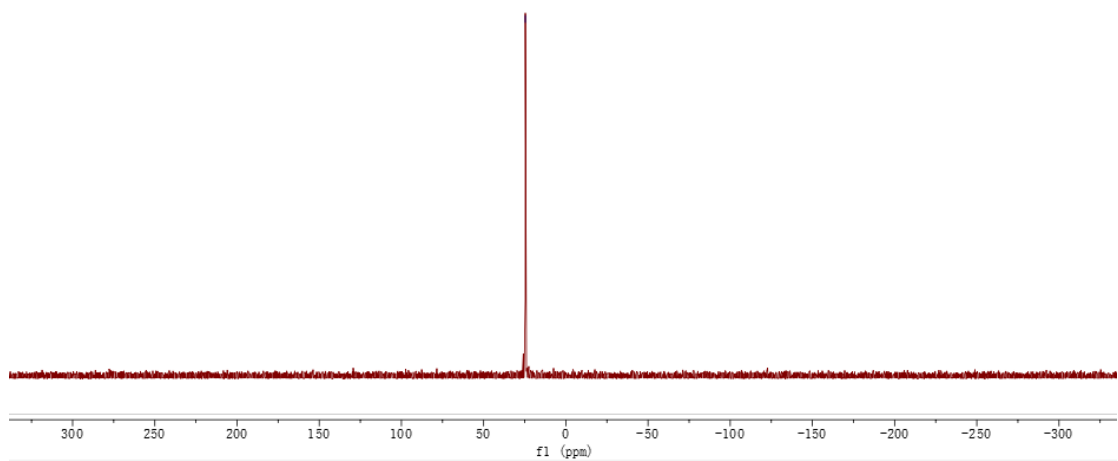



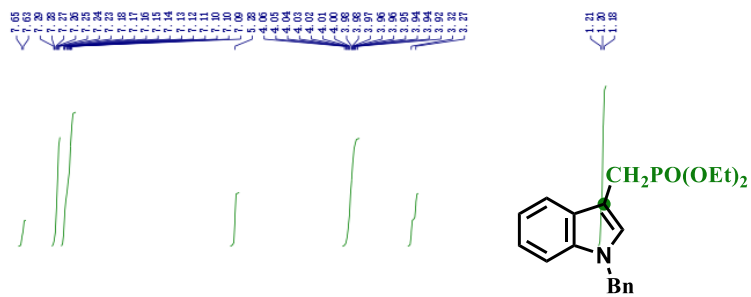

$^1\text{H NMR}$  of **4a** (400 MHz, Chloroform-*d*)

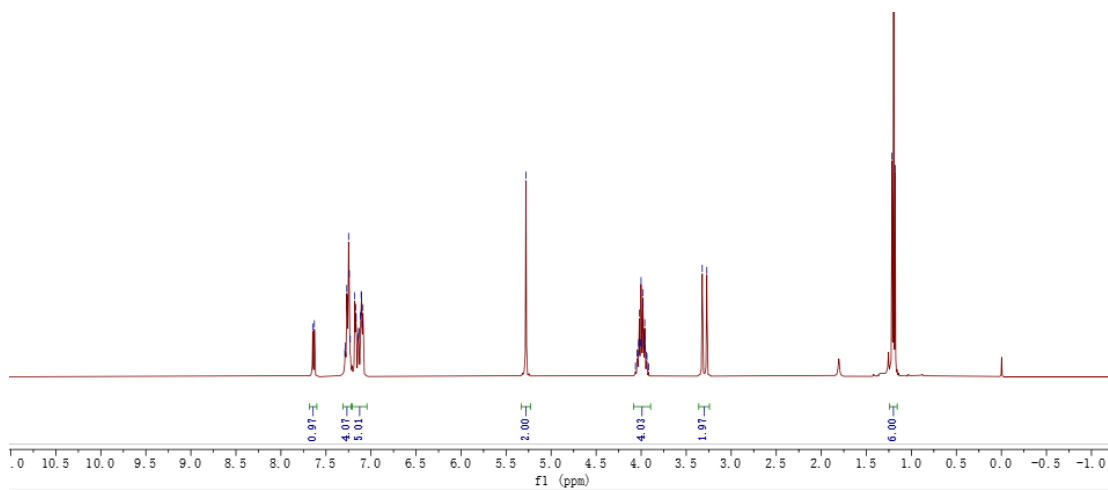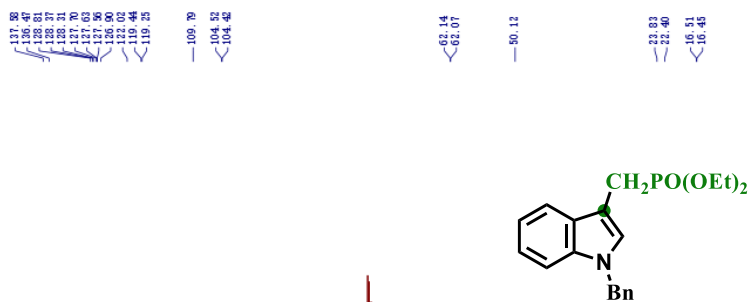

$^{13}\text{C NMR}$  of **4a** (101 MHz, Chloroform-*d*)

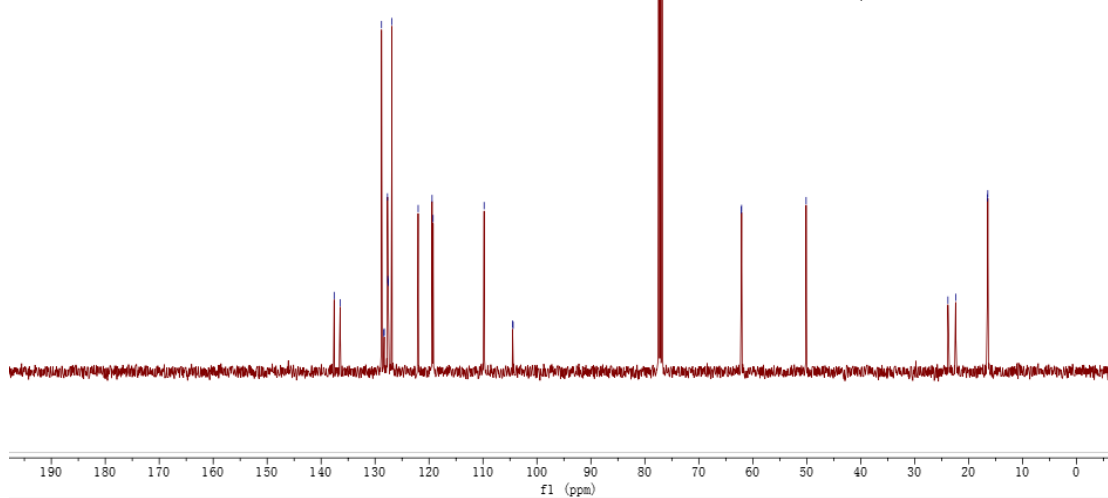

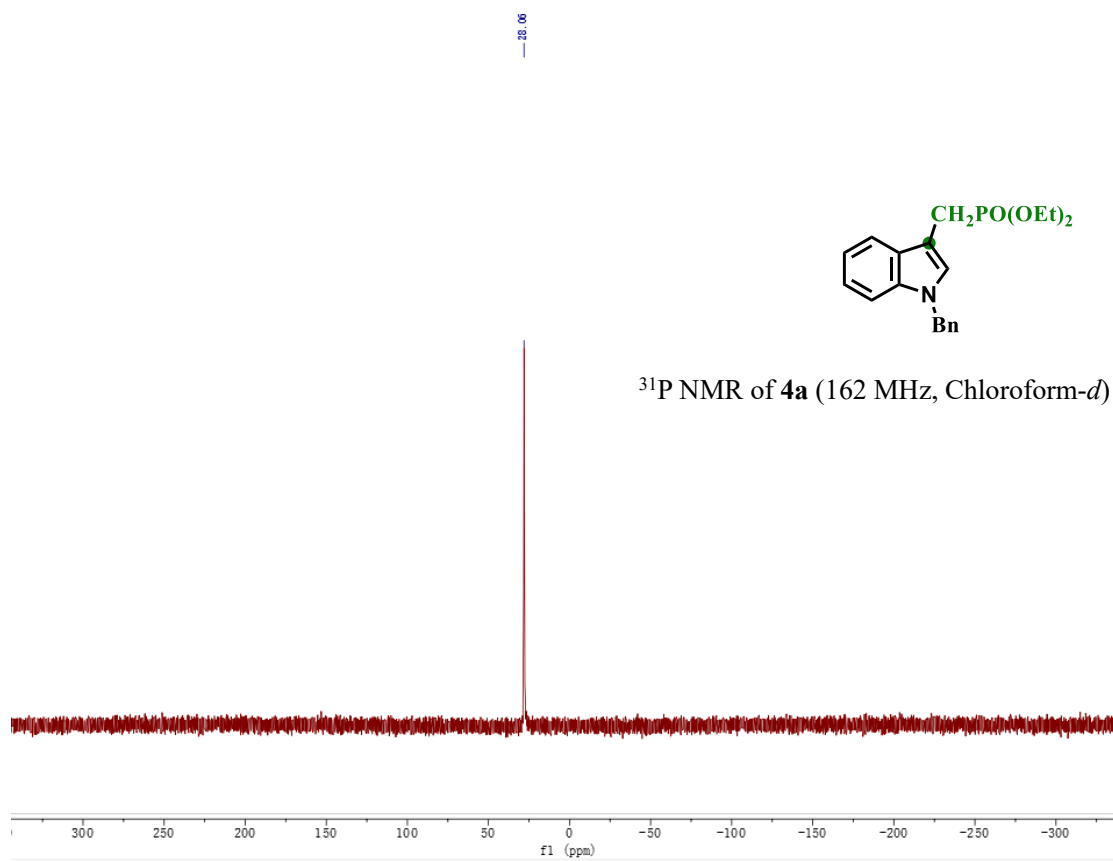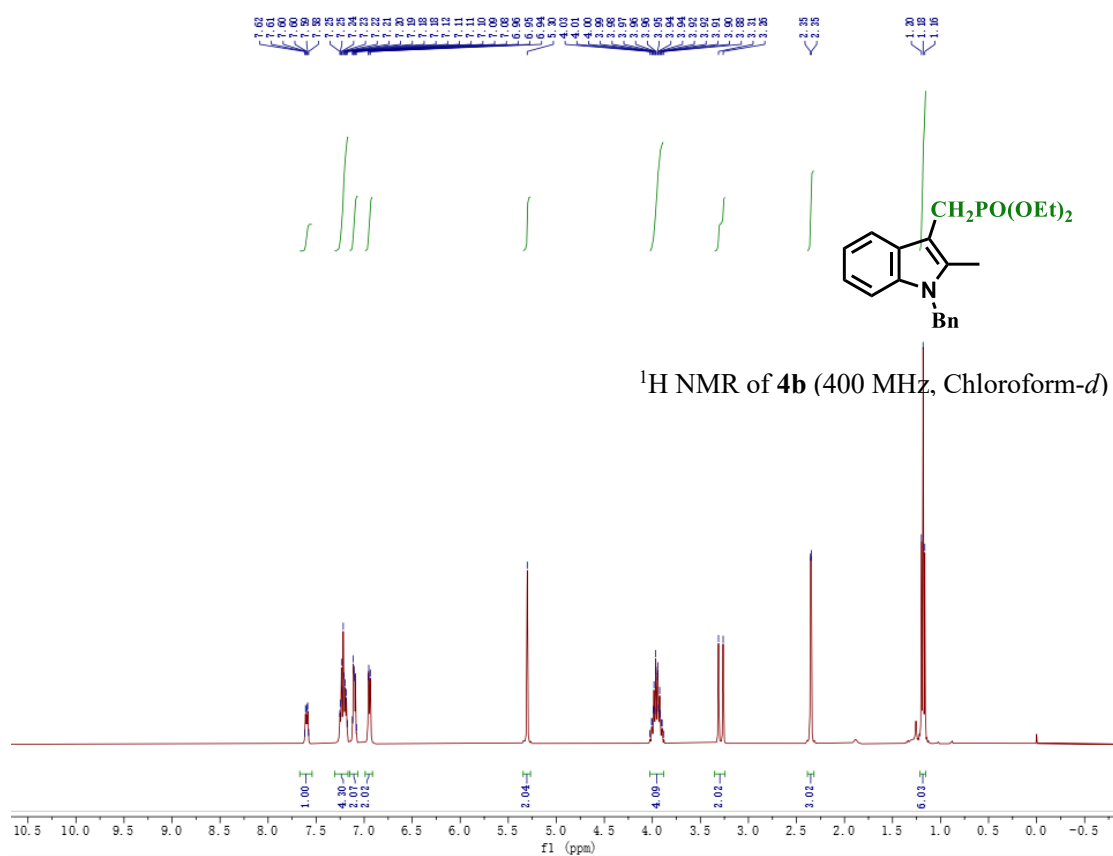

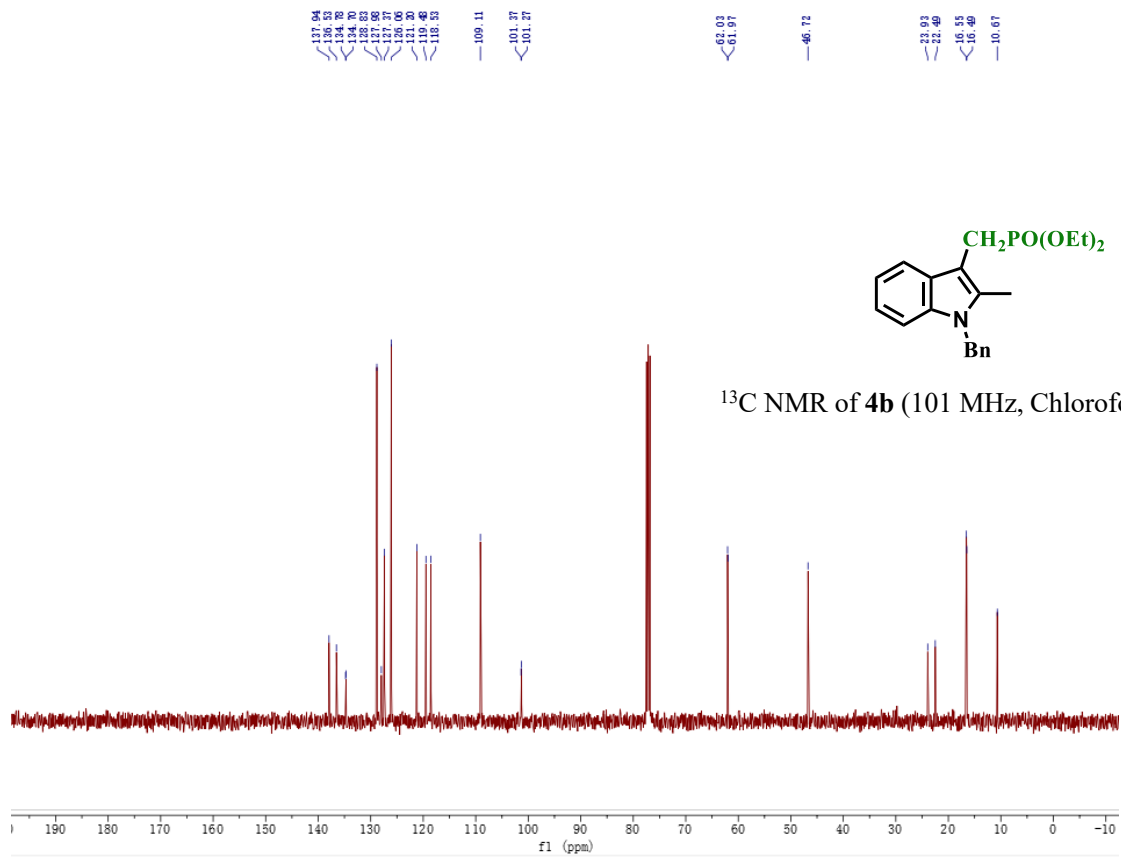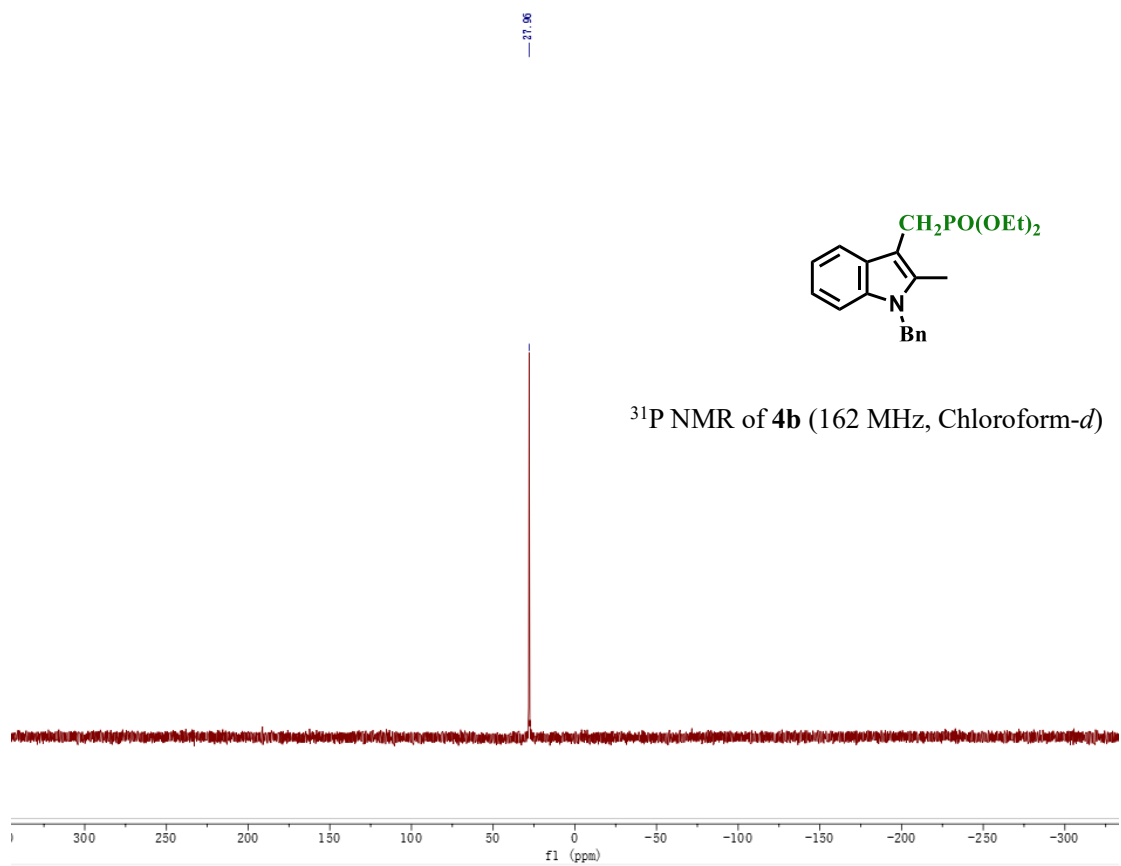

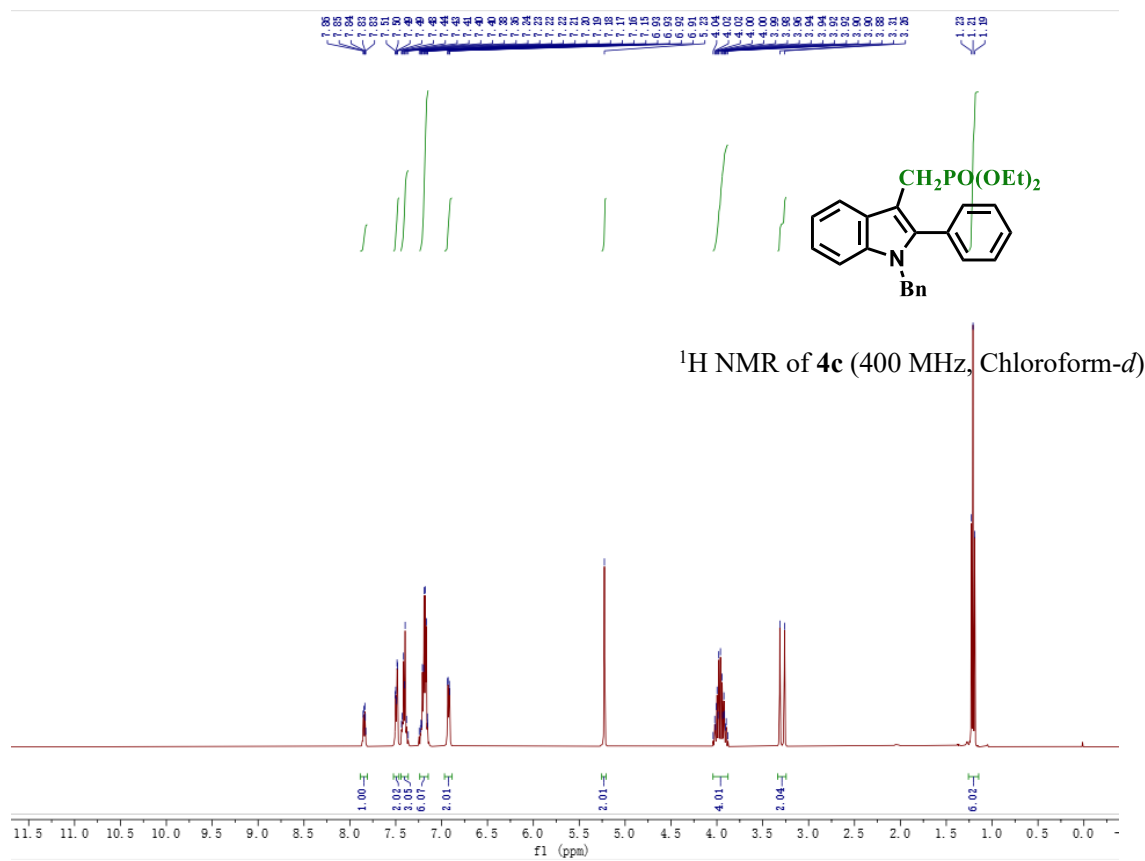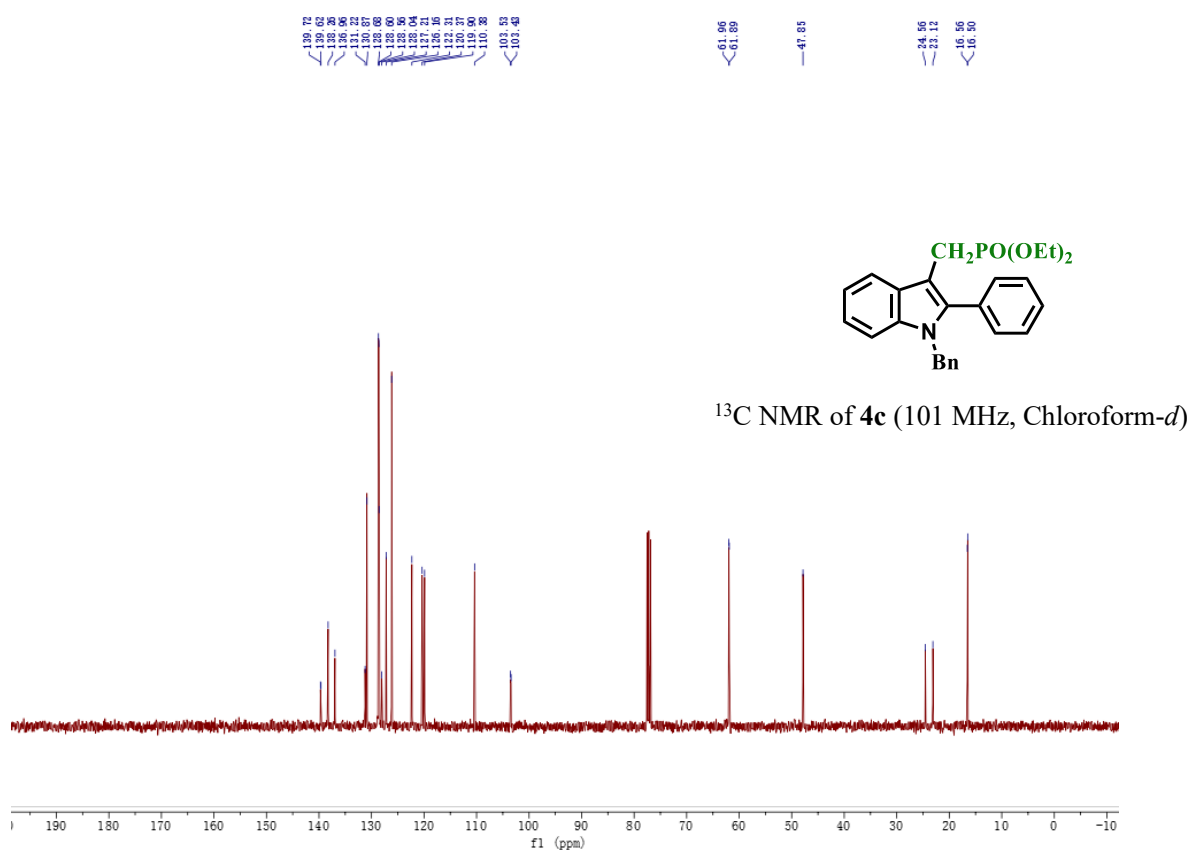

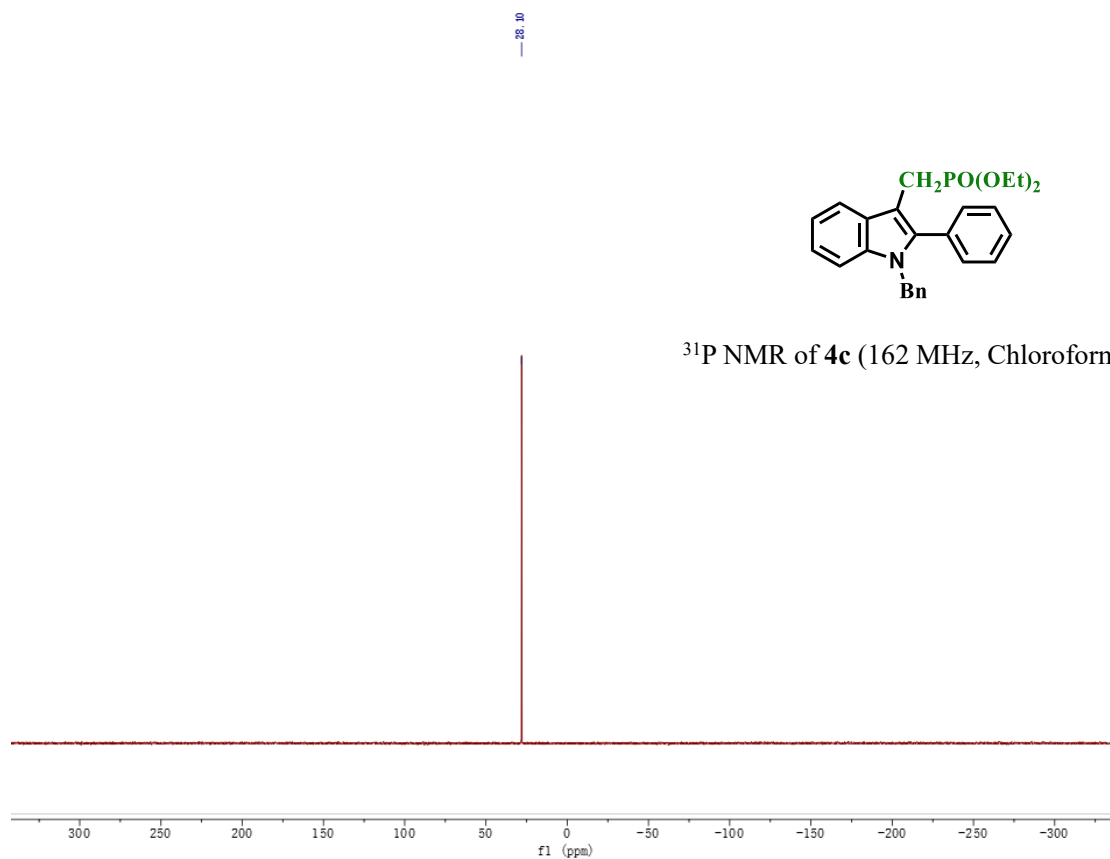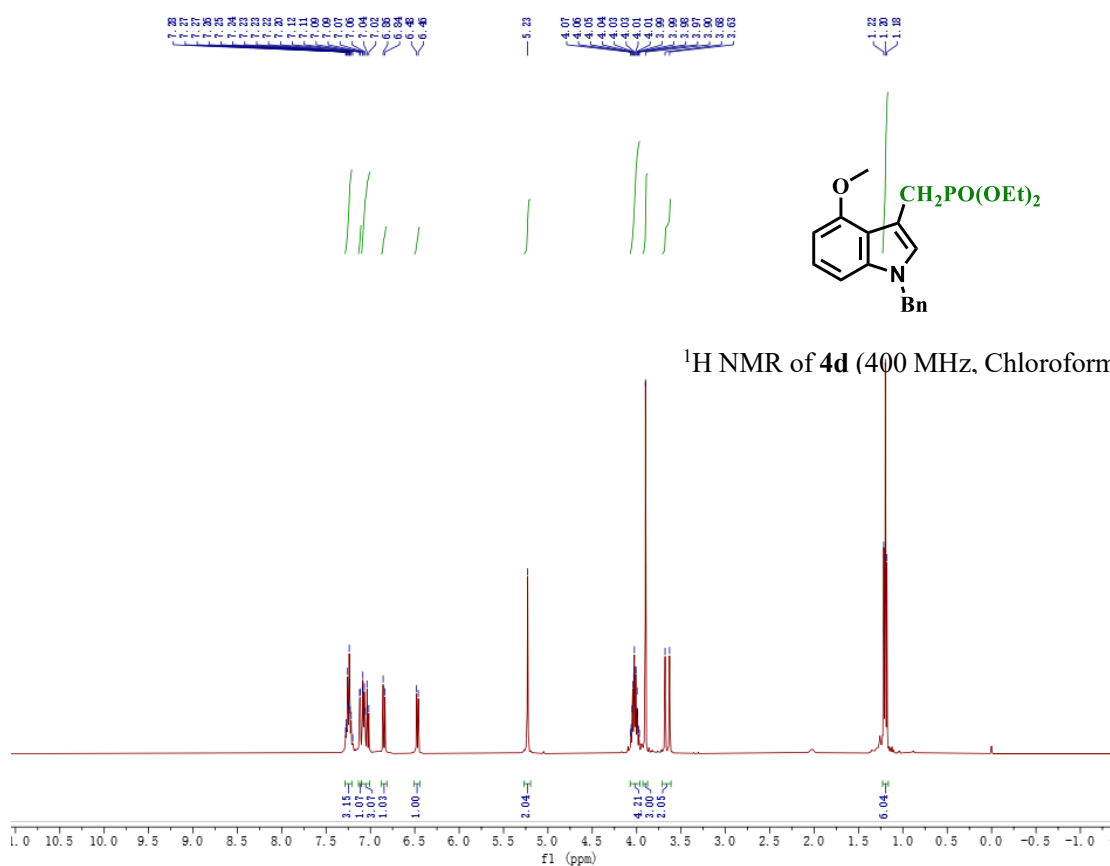

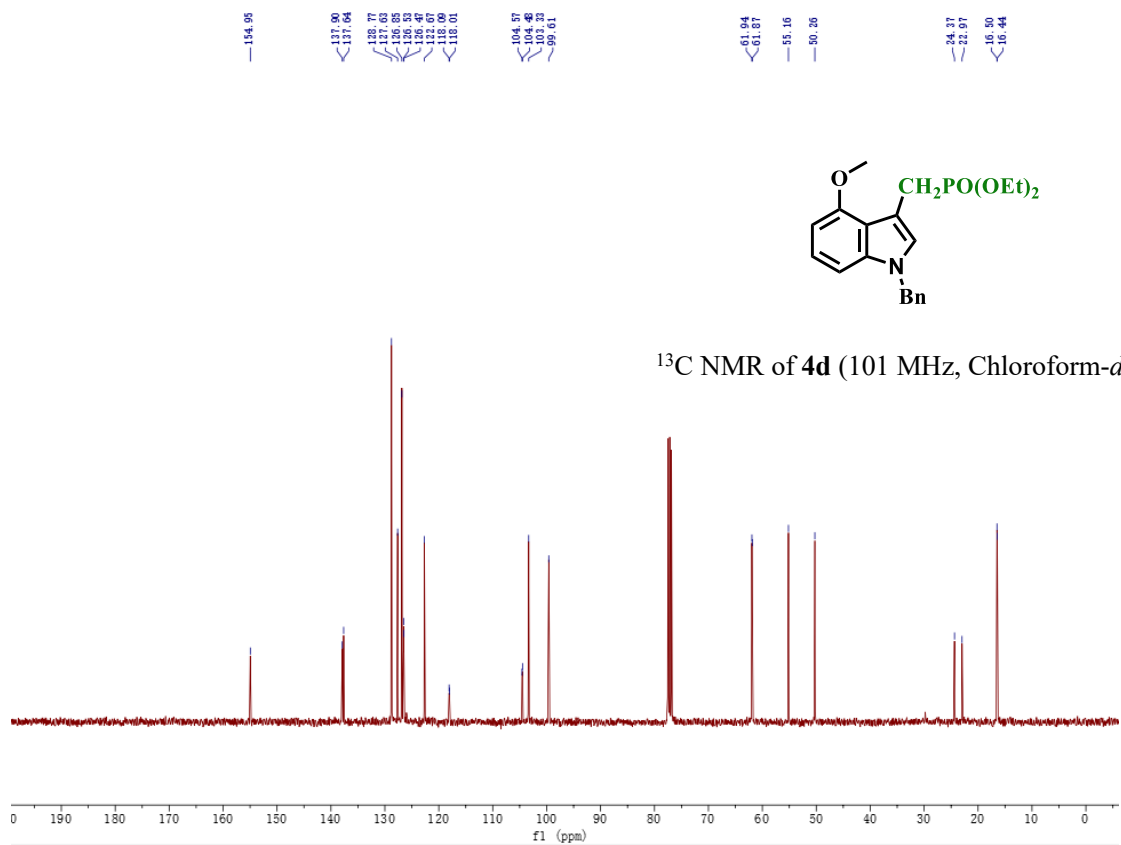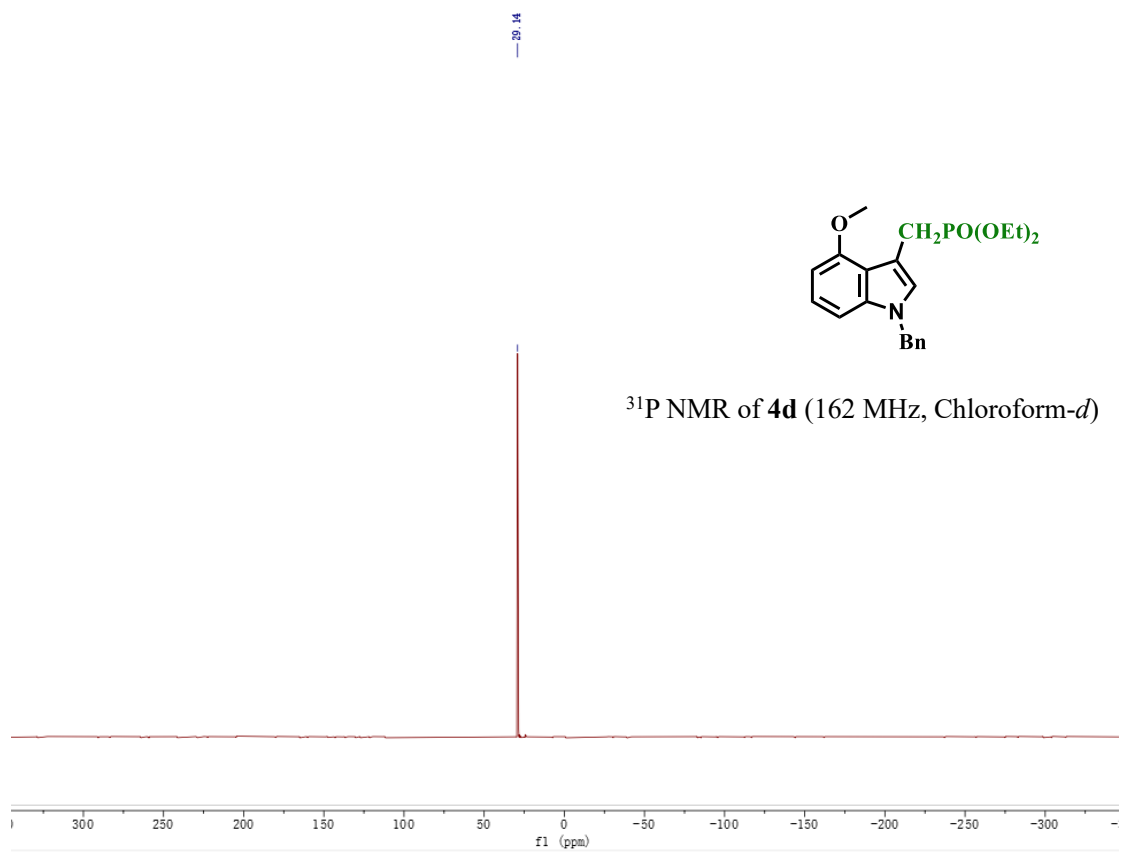

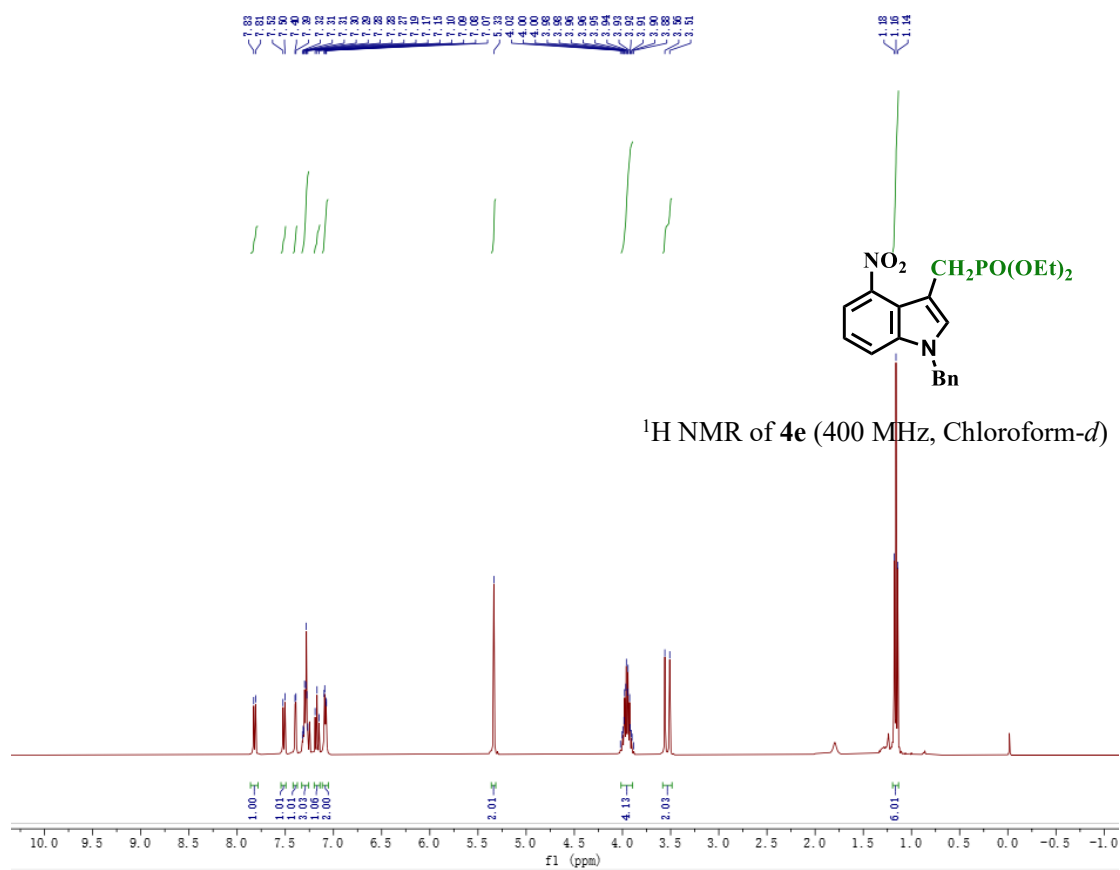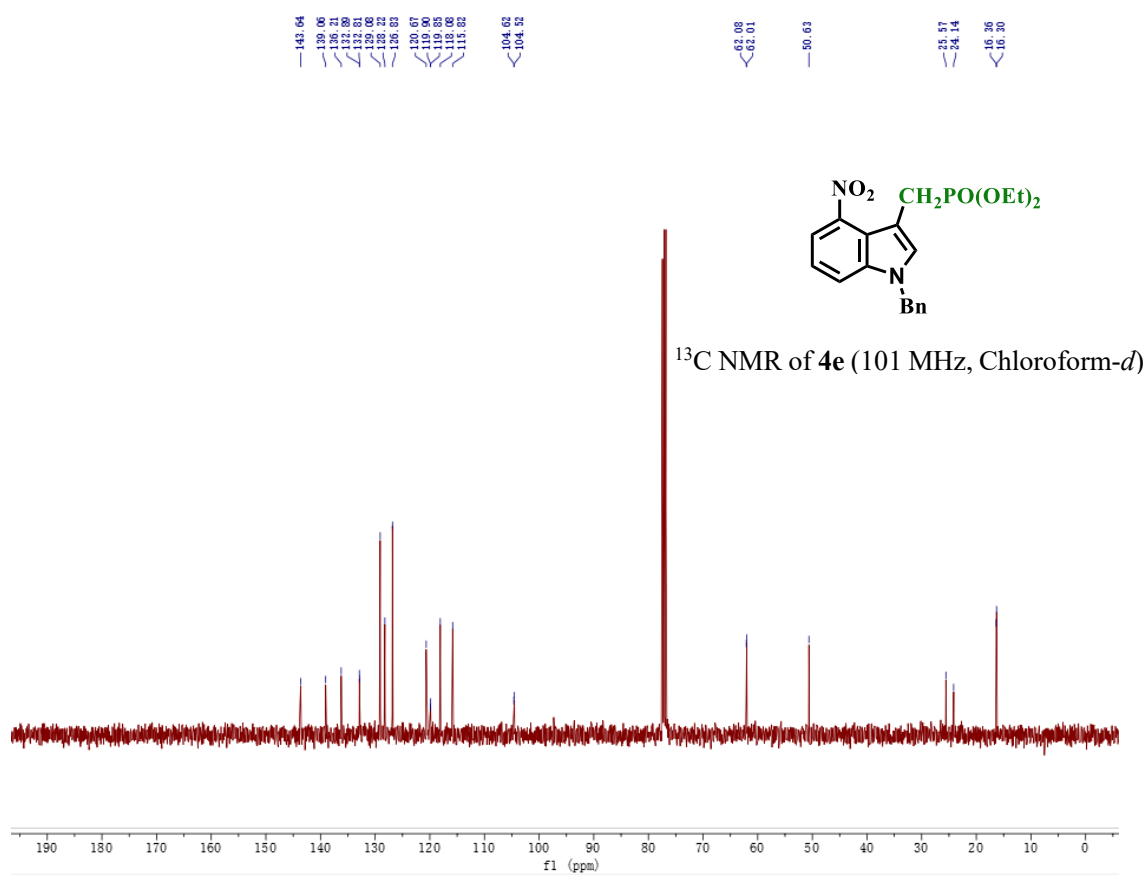

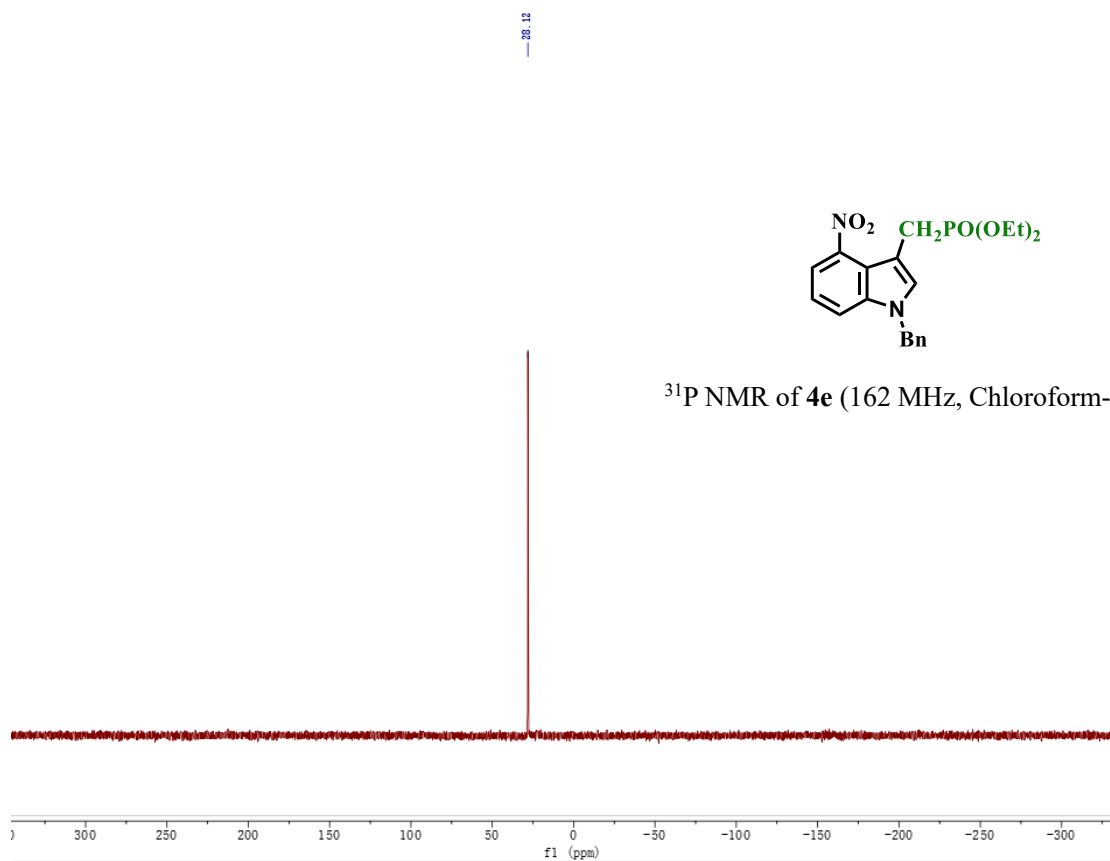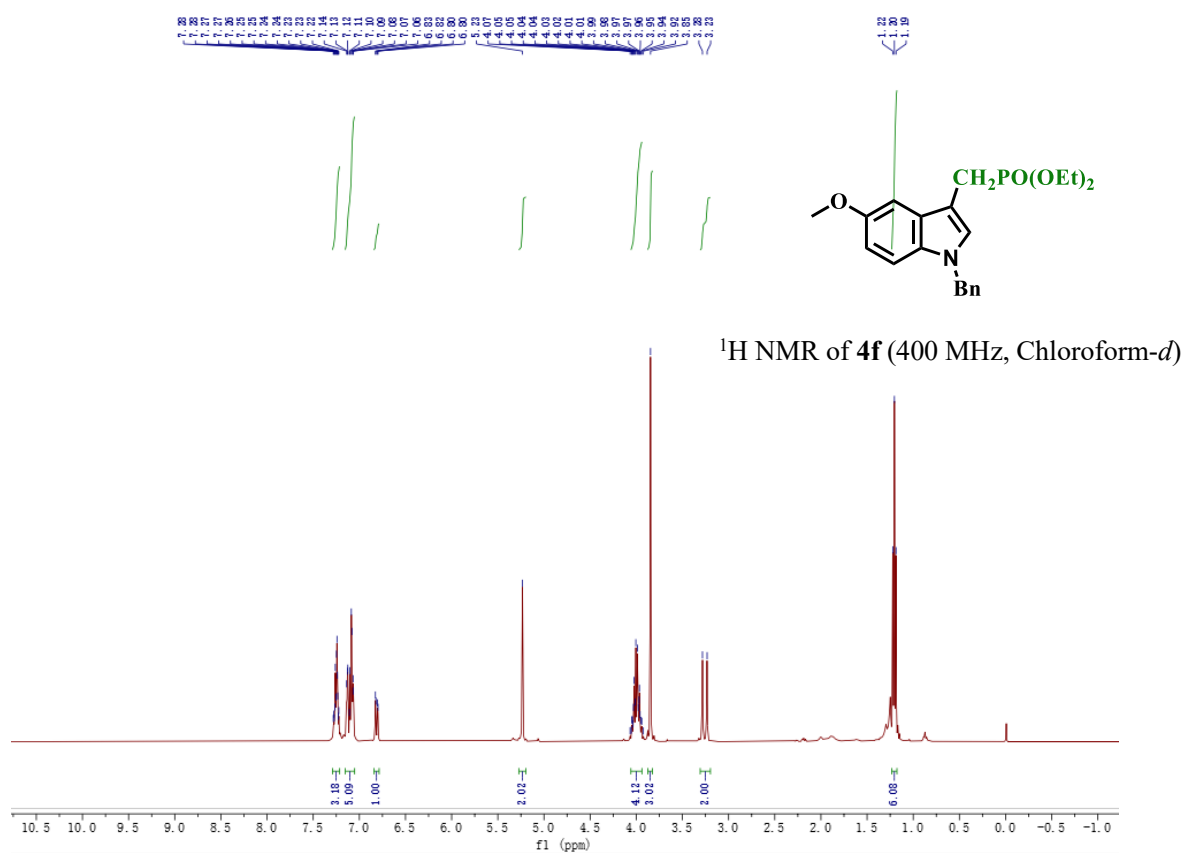



154.17  
 137.05  
 131.76  
 128.30  
 128.04  
 127.69  
 126.83  
 112.40  
 110.05  
 103.91  
 103.82  
 100.96  
 62.16  
 62.09  
 55.95  
 50.31  
 29.78  
 23.99  
 22.33  
 16.54  
 16.49

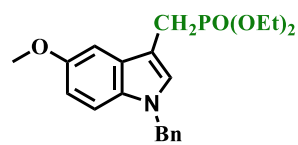

$^{13}\text{C}$  NMR of **4f** (101 MHz, Chloroform-*d*)

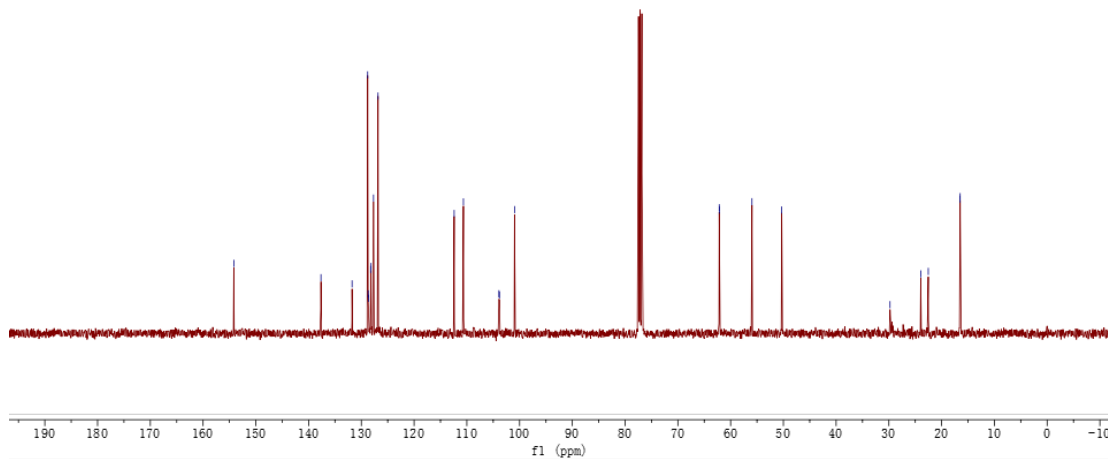

81

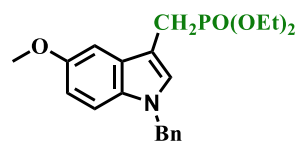

$^{31}\text{P}$  NMR of **4f** (162 MHz, Chloroform-*d*)

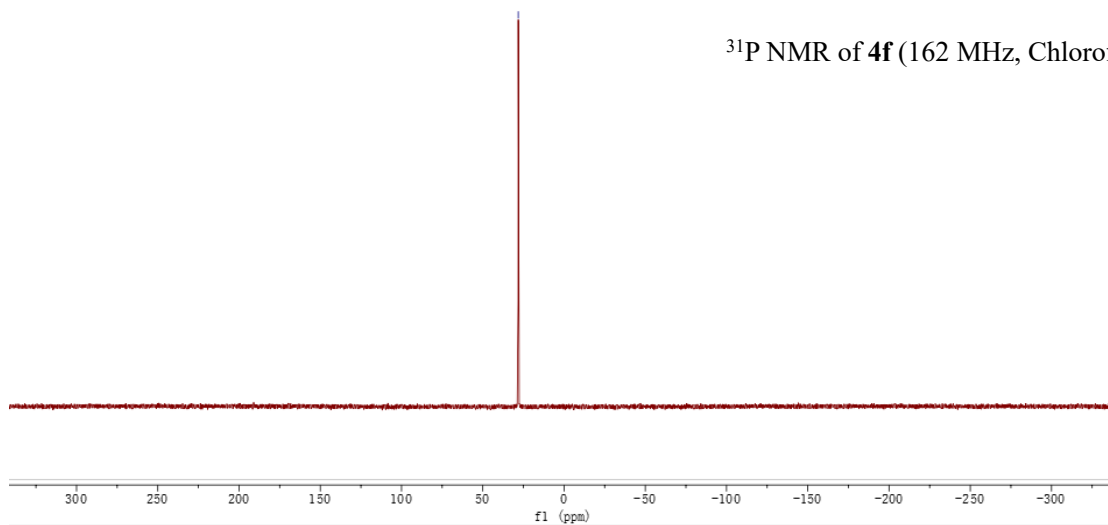

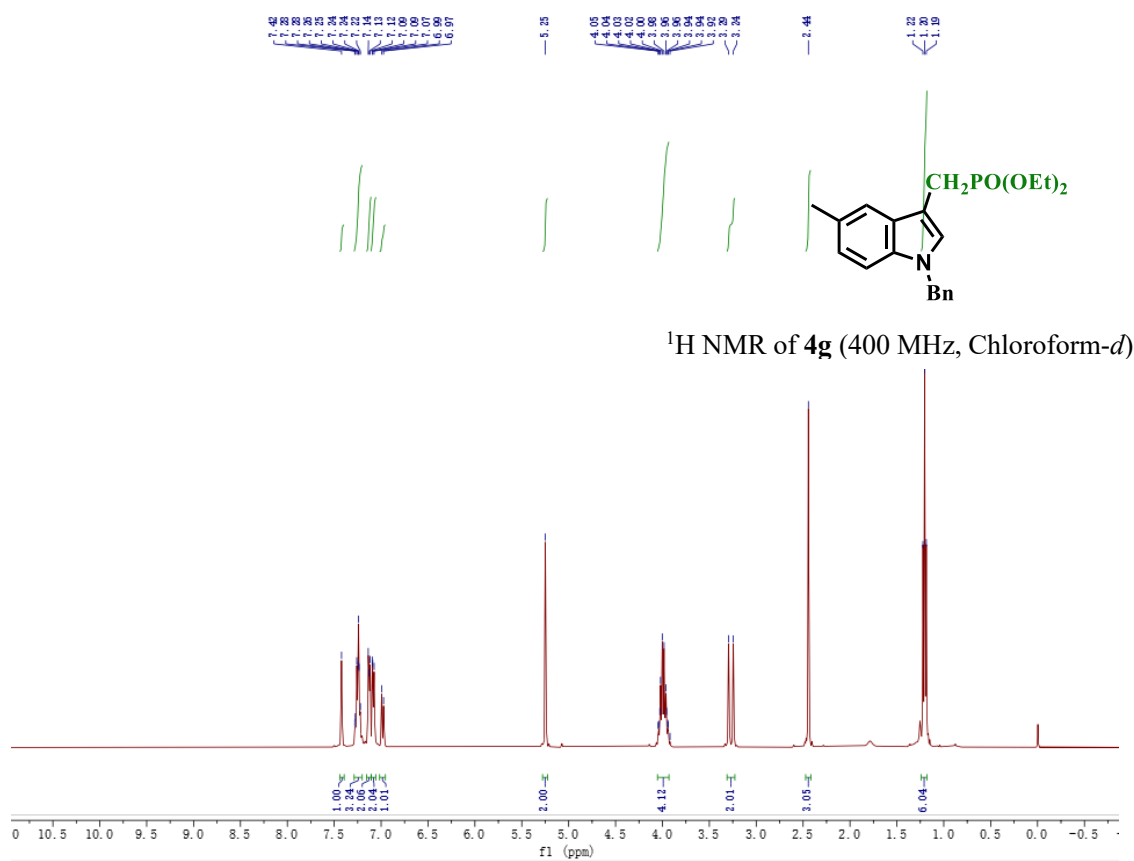

$^1\text{H NMR}$  of **4g** (400 MHz, Chloroform-*d*)

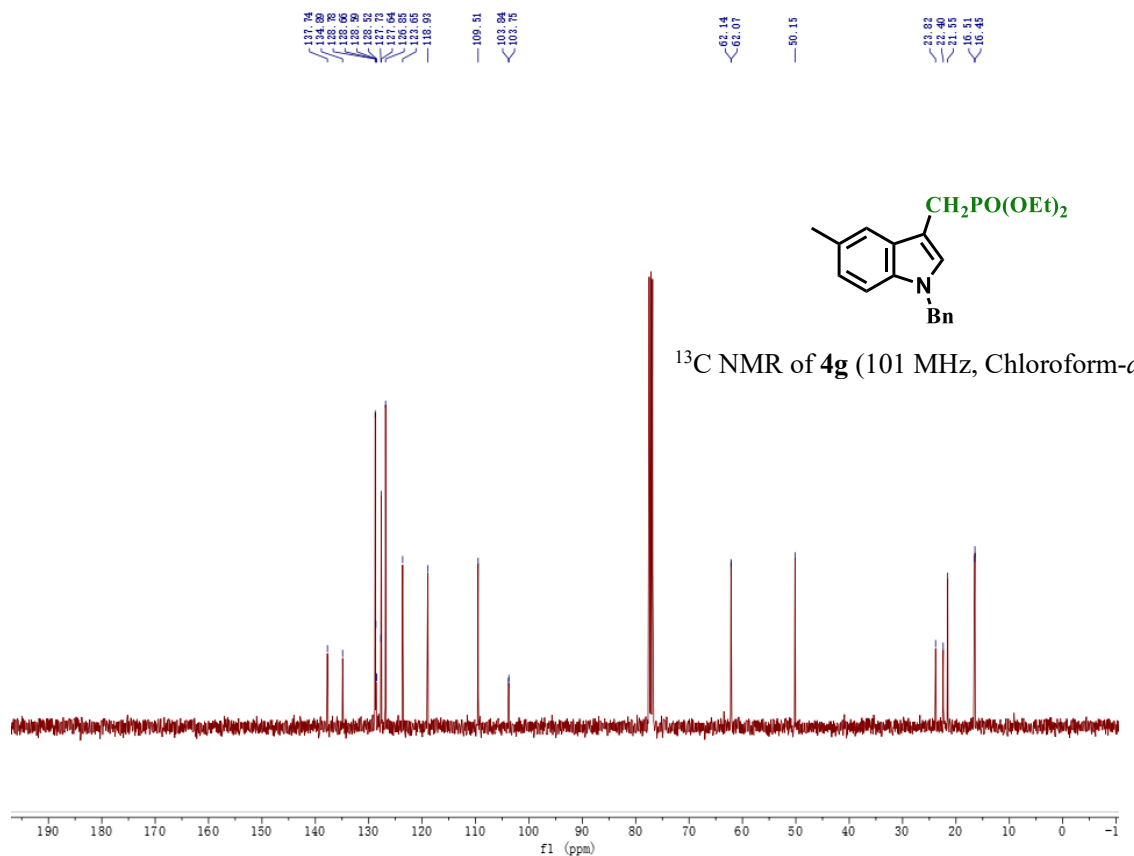

$^{13}\text{C NMR}$  of **4g** (101 MHz, Chloroform-*d*)

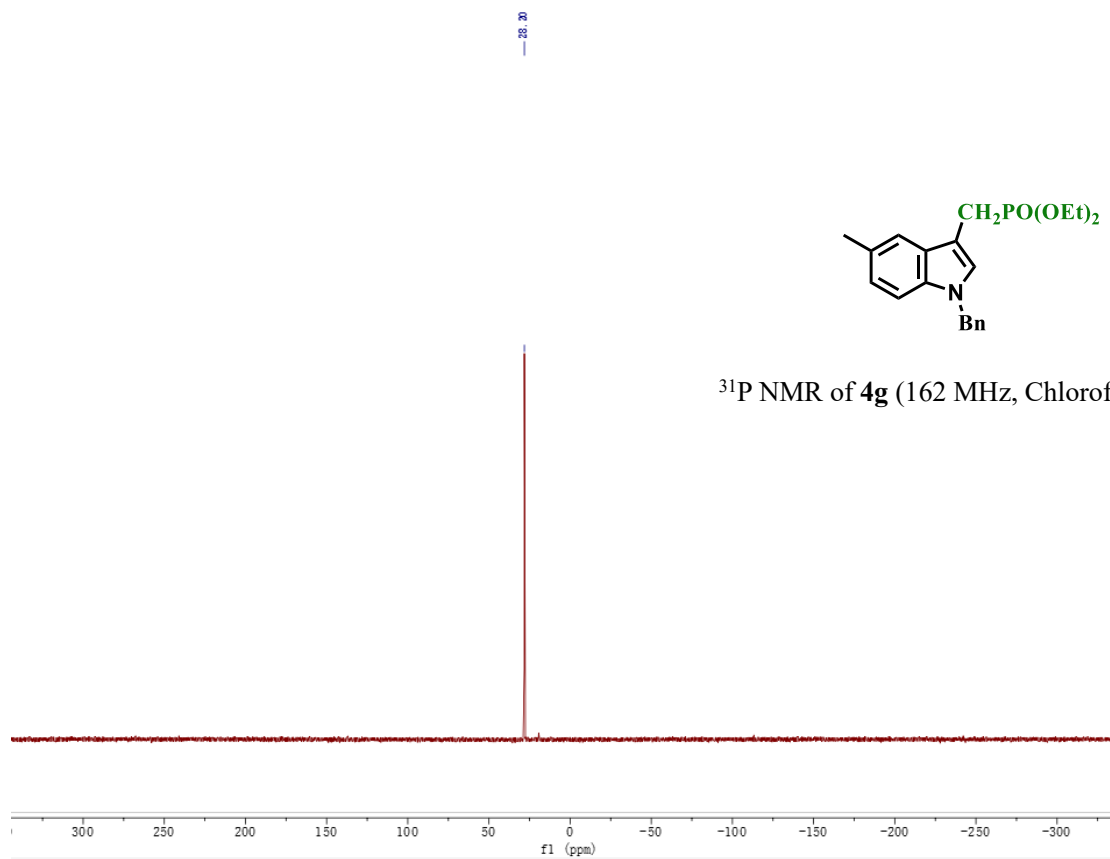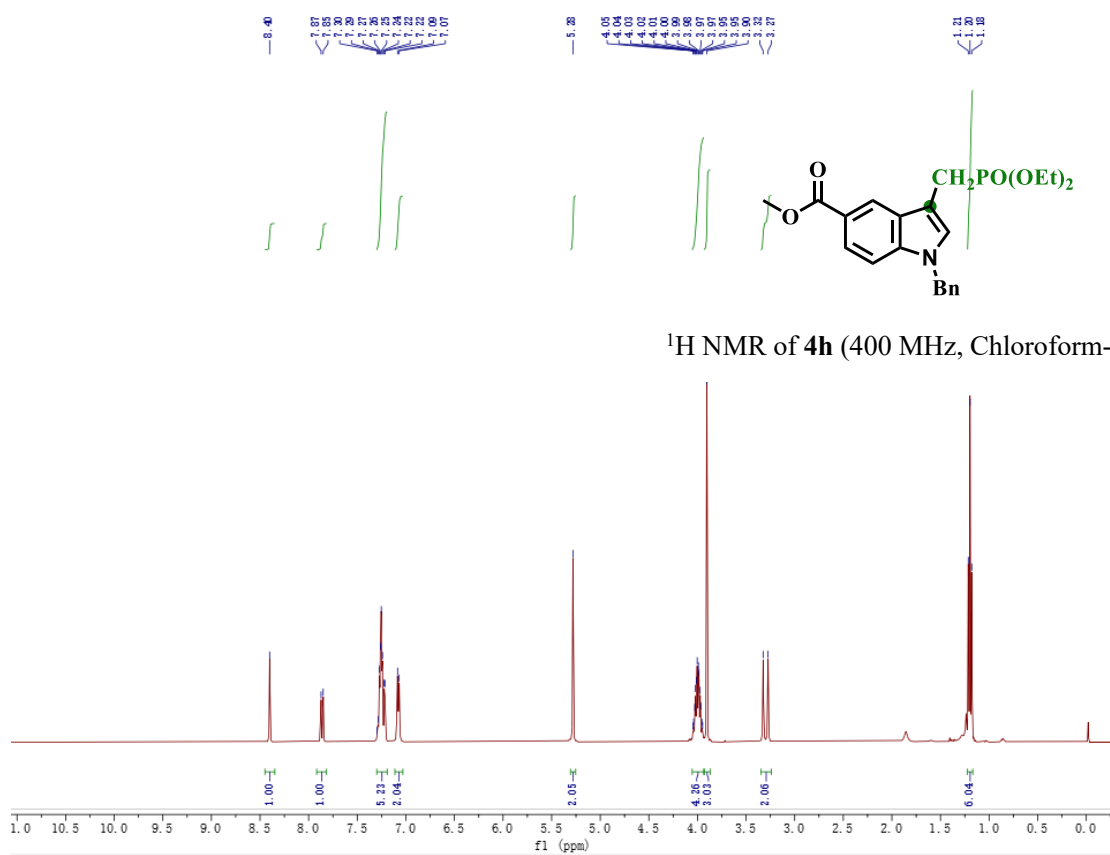

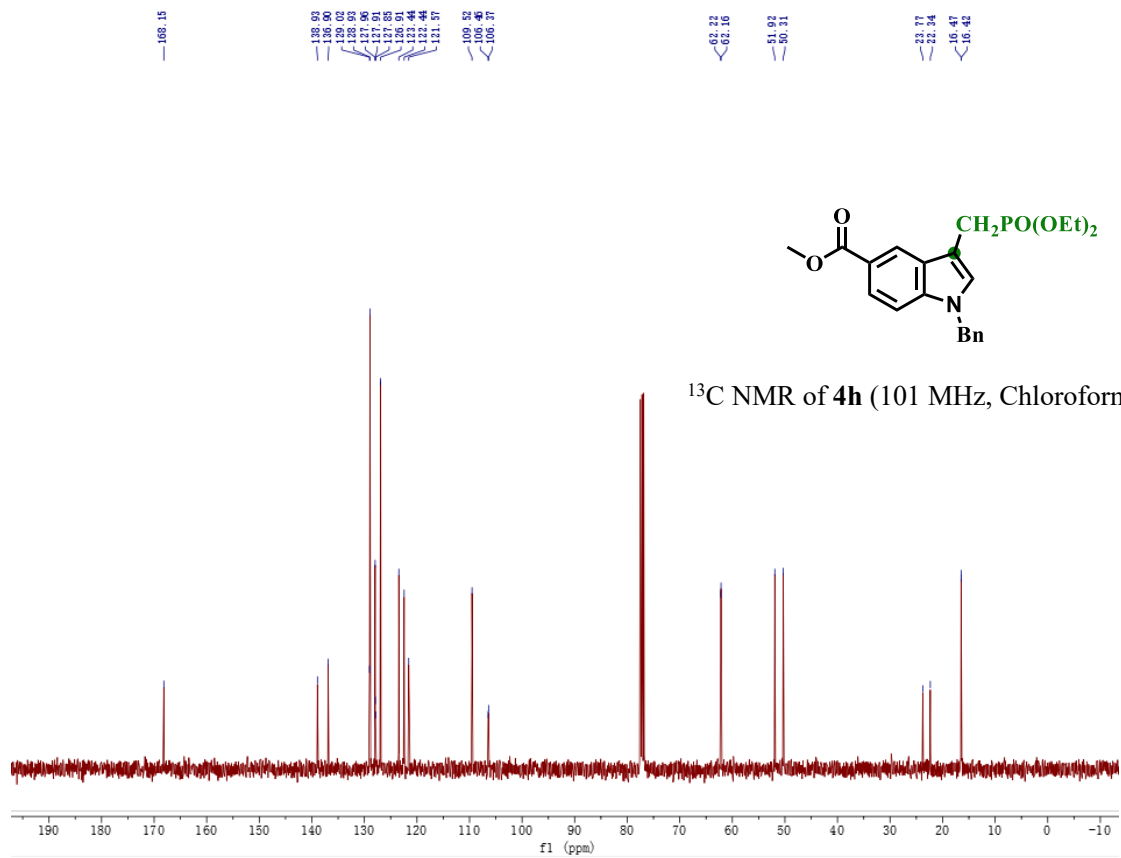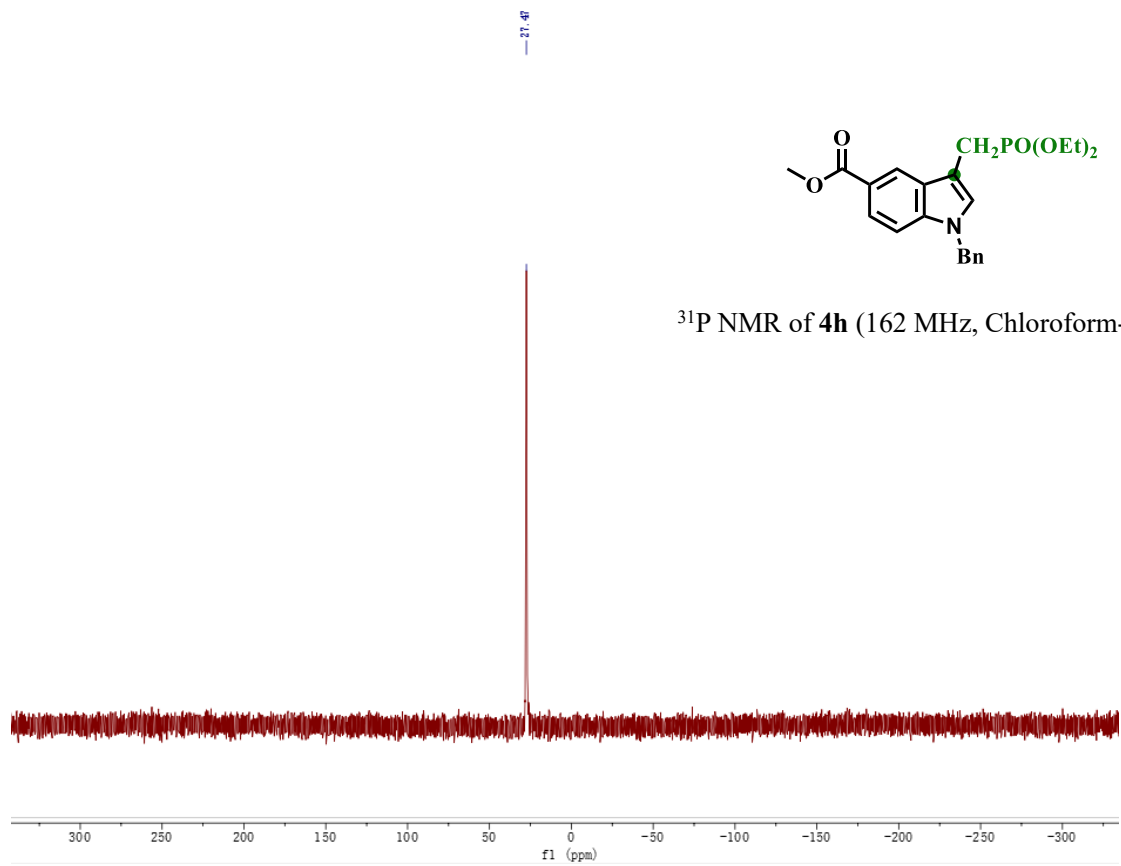

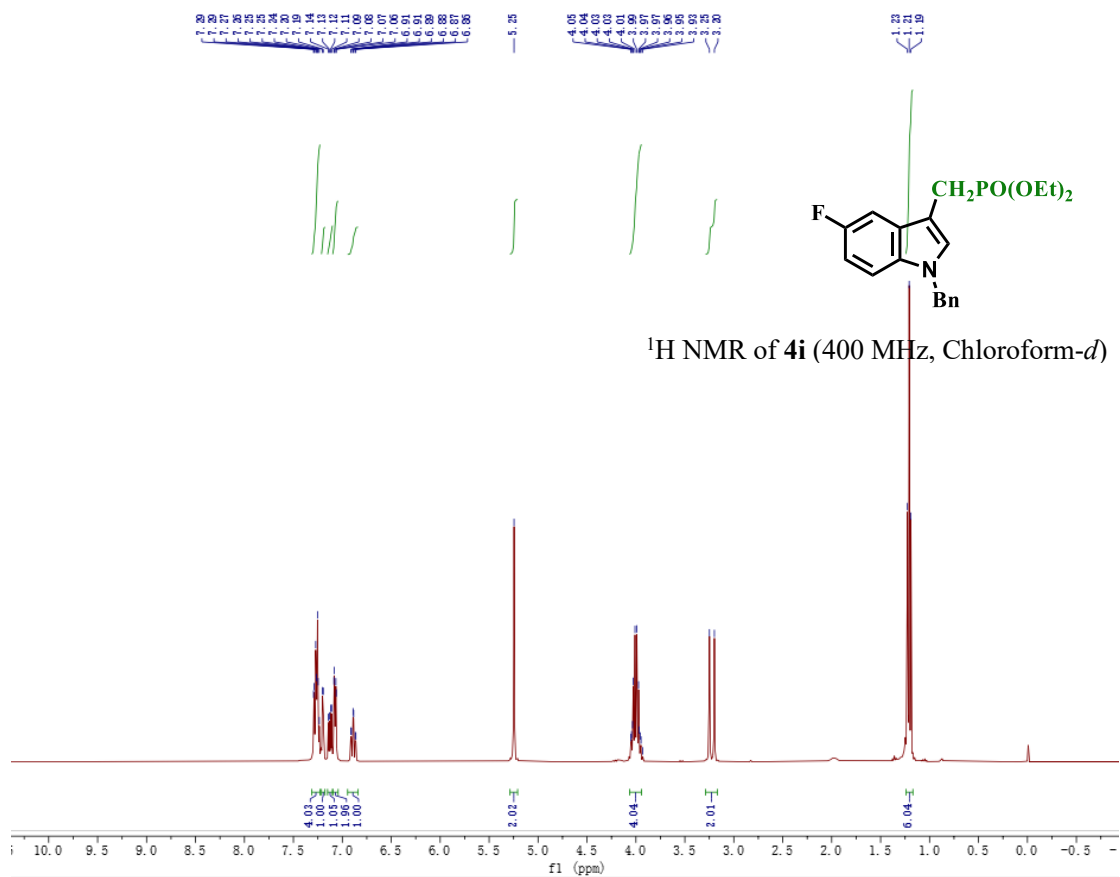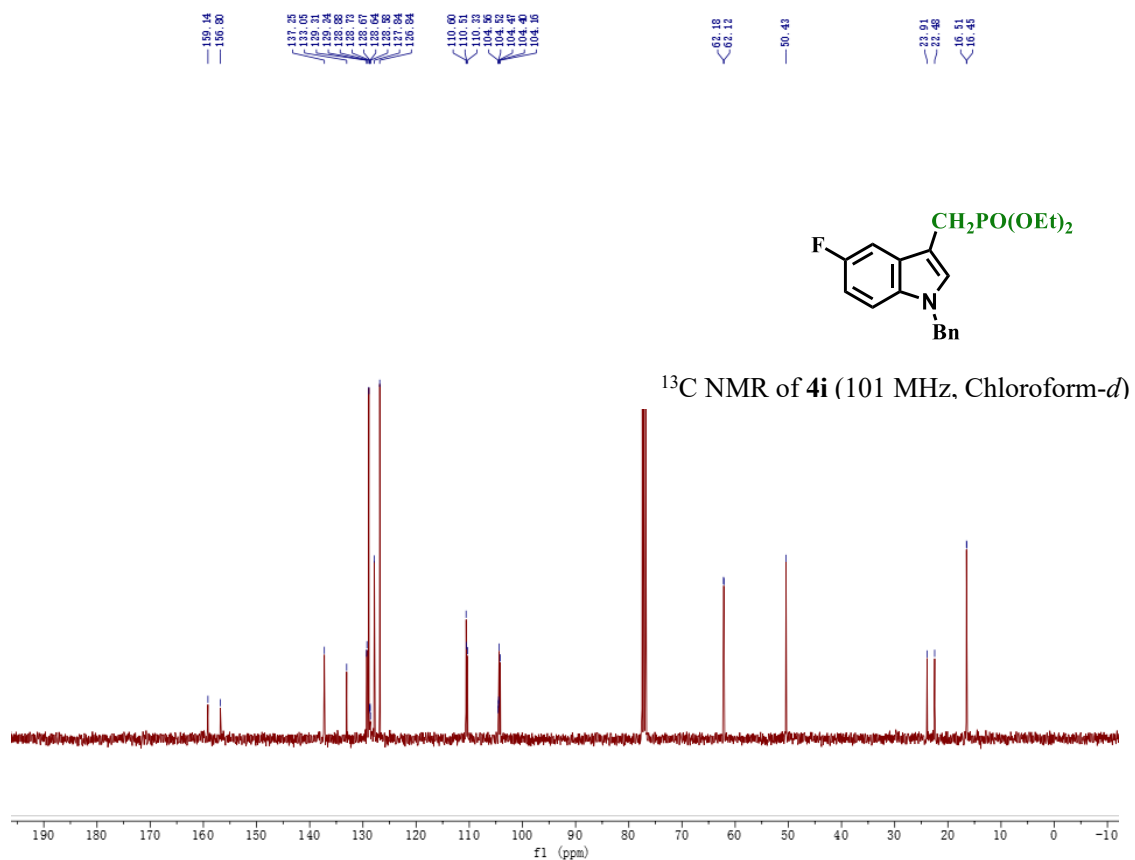

-124.72

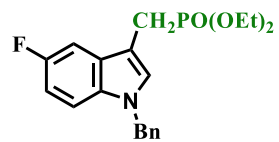

$^{19}\text{F}$  NMR of **4i** (376 MHz, Chloroform-*d*)

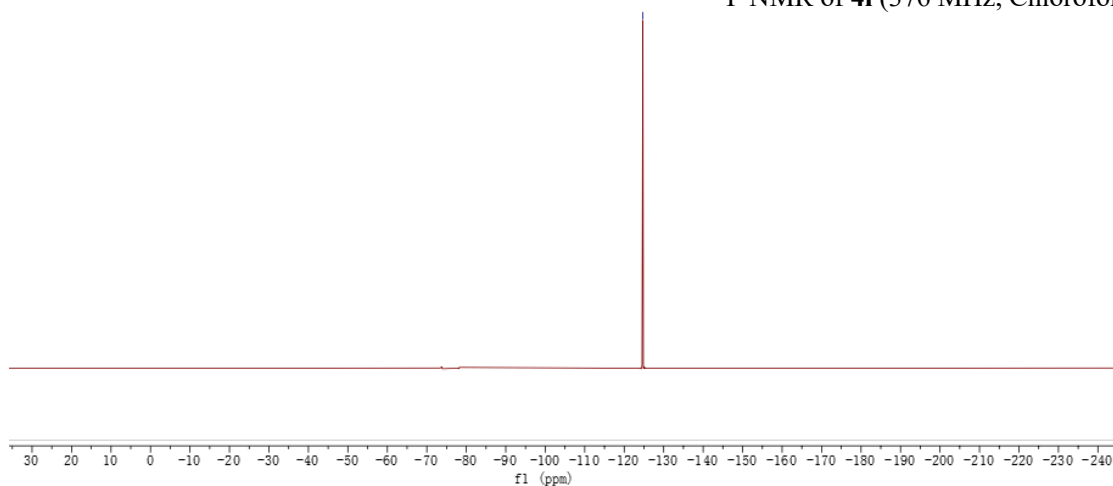

-17.88

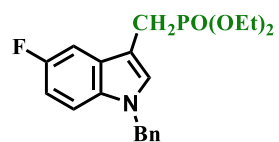

$^{31}\text{P}$  NMR of **4i** (162 MHz, Chloroform-*d*)

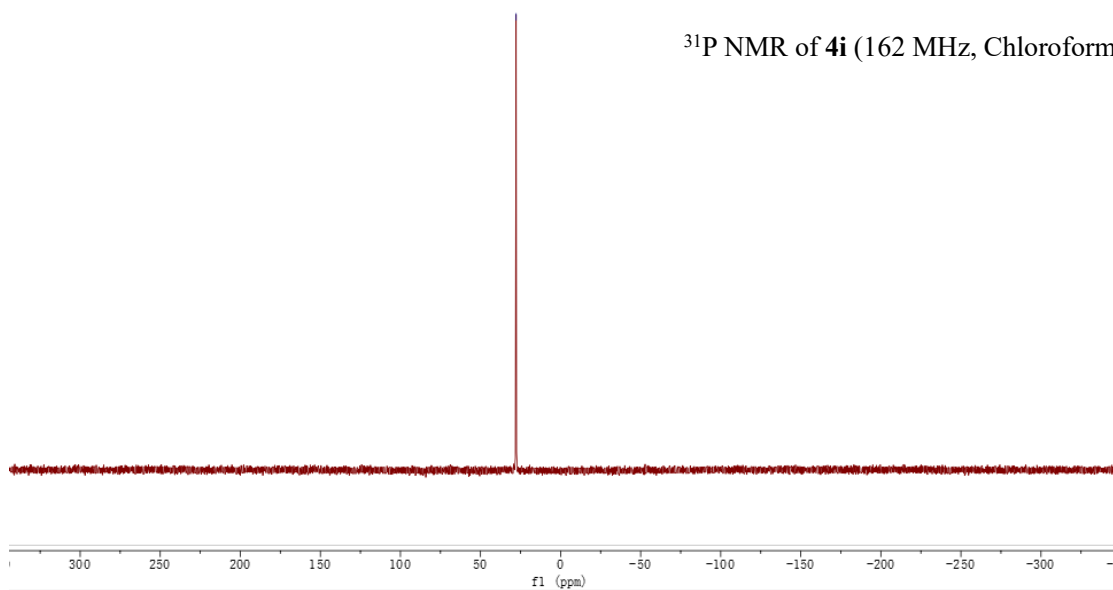

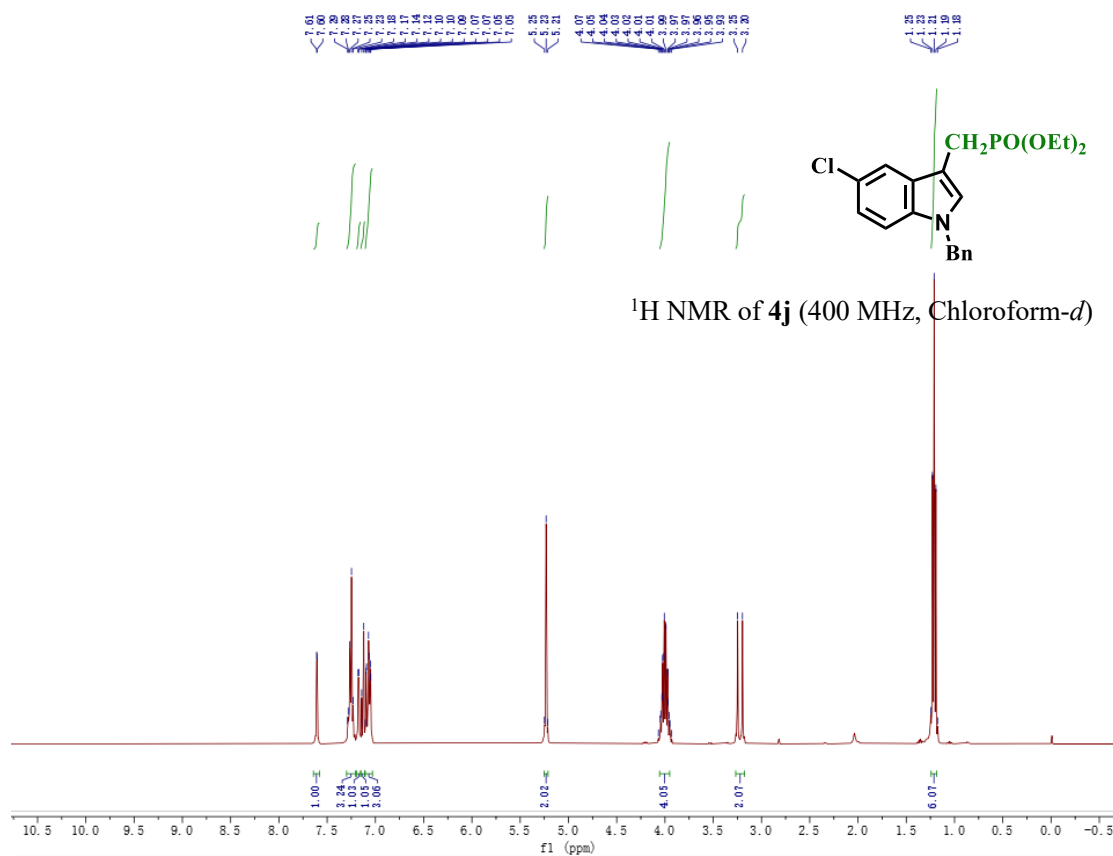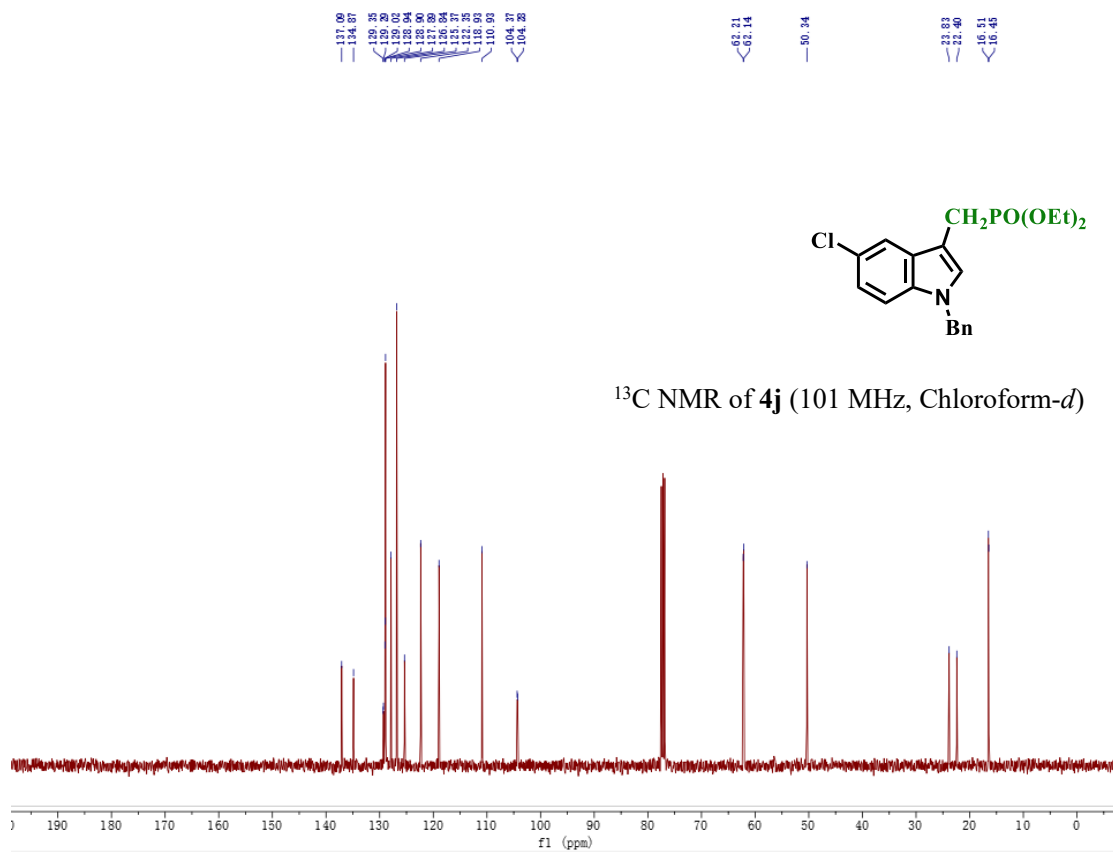

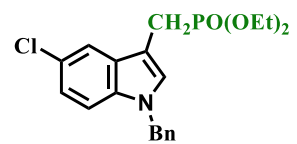

$^{31}\text{P}$  NMR of 4j (162 MHz, Chloroform-*d*)

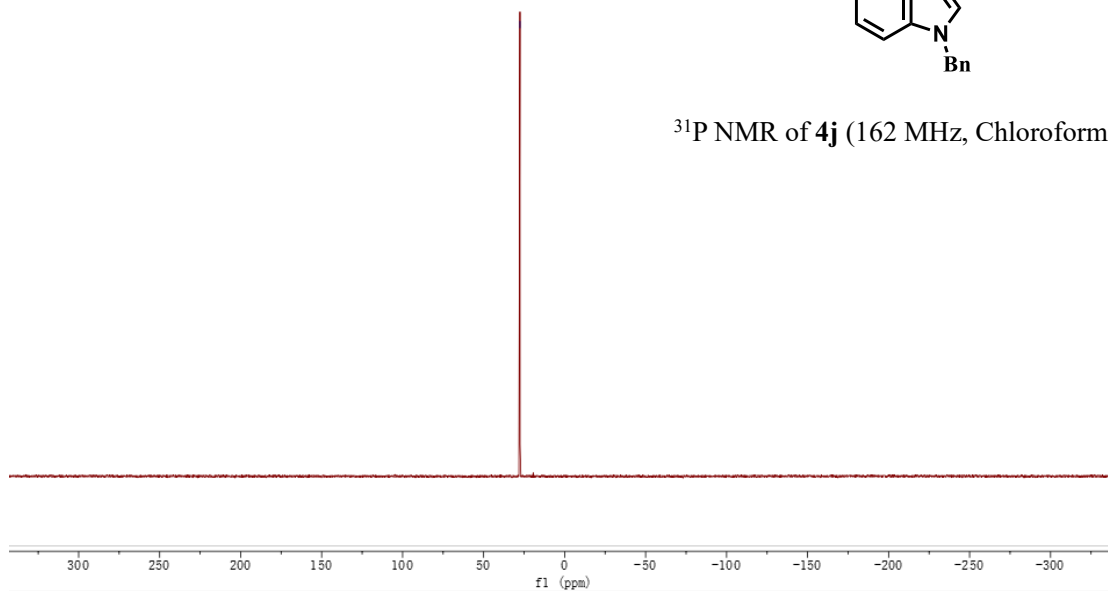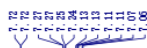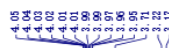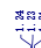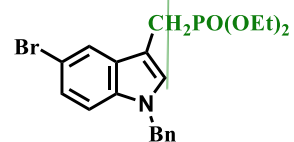

$^1\text{H}$  NMR of 4k (400 MHz, Chloroform-*d*)

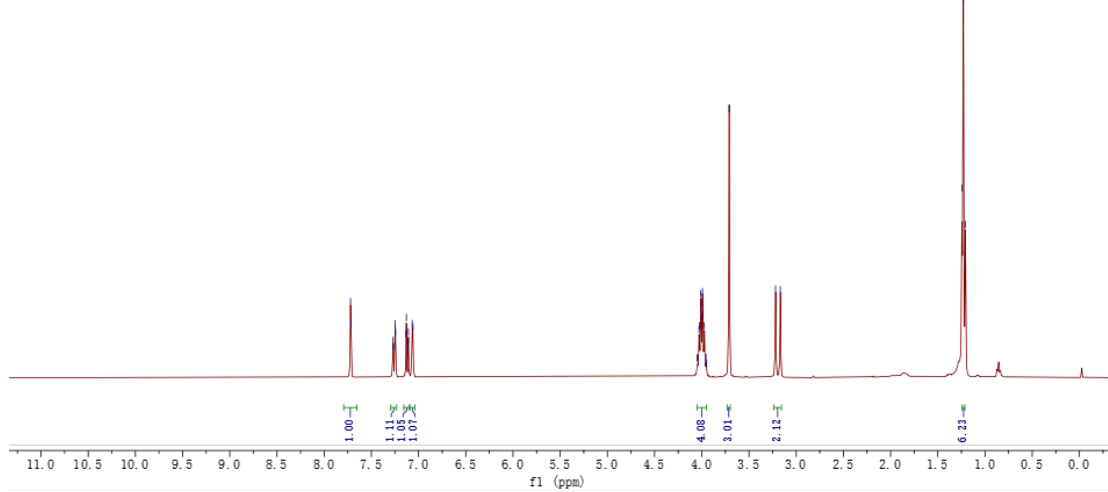



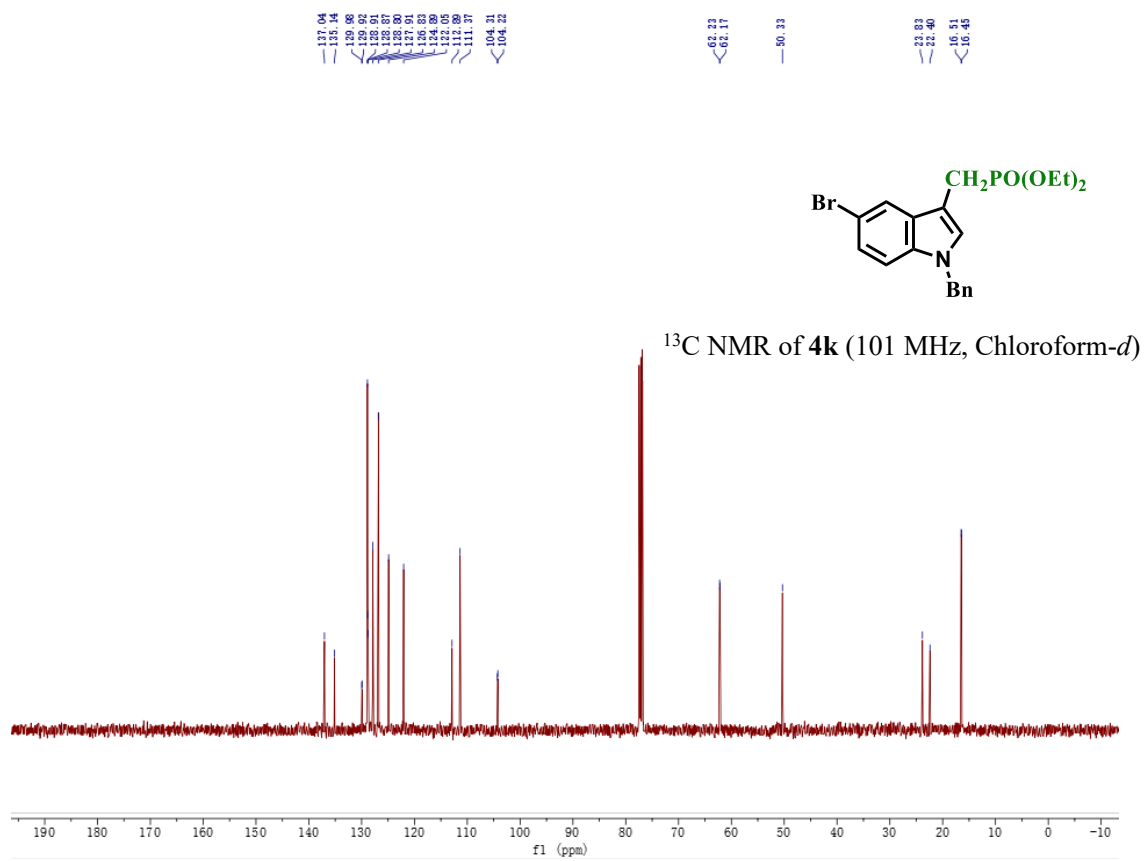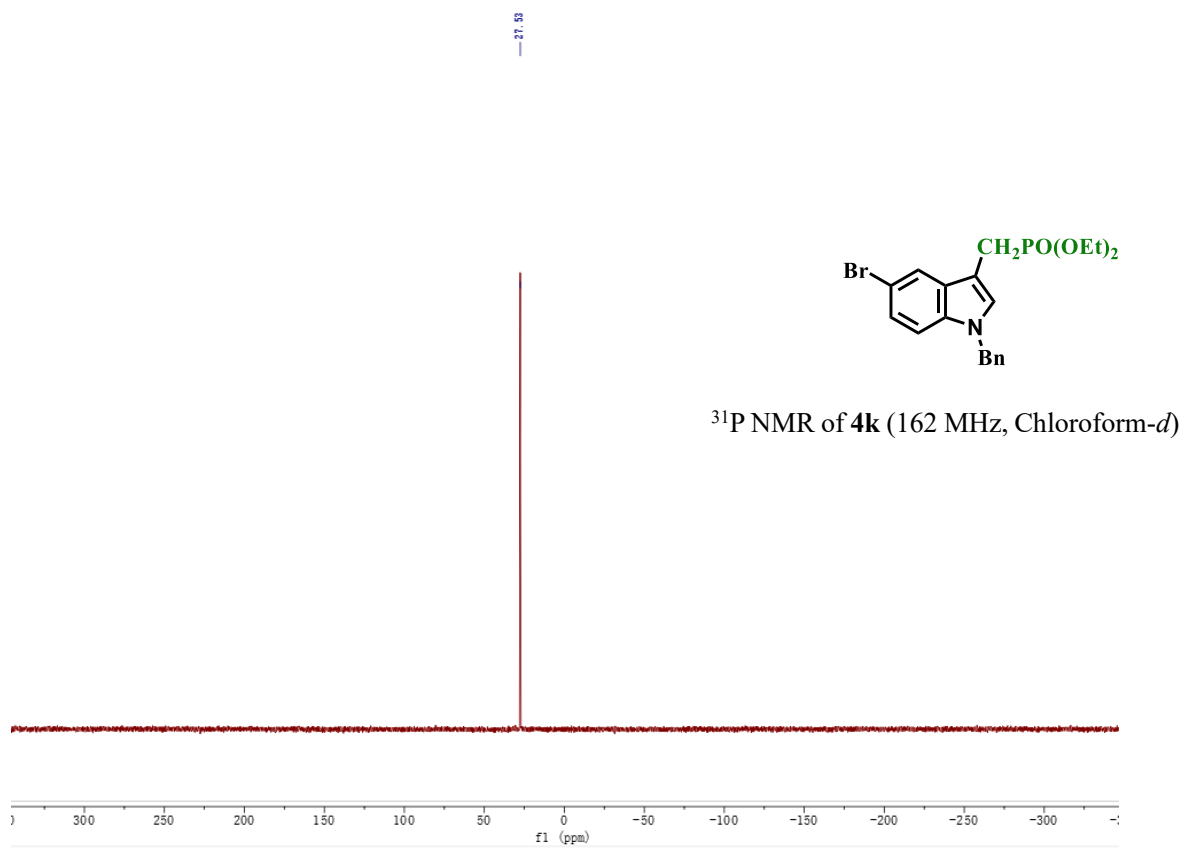

7.28 7.27 7.27 7.27 7.25 7.25 7.25 7.25 7.24 7.24 7.22 7.22 7.15 7.13 7.13 7.11 7.11 7.10 7.10 7.06 7.06 7.05 7.05 7.02 7.02 7.01 7.01 6.99 6.99 3.92 3.92 3.92 3.92 1.22 1.20

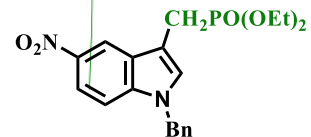

<sup>1</sup>H NMR of **4I** (400 MHz, Chloroform-*d*)

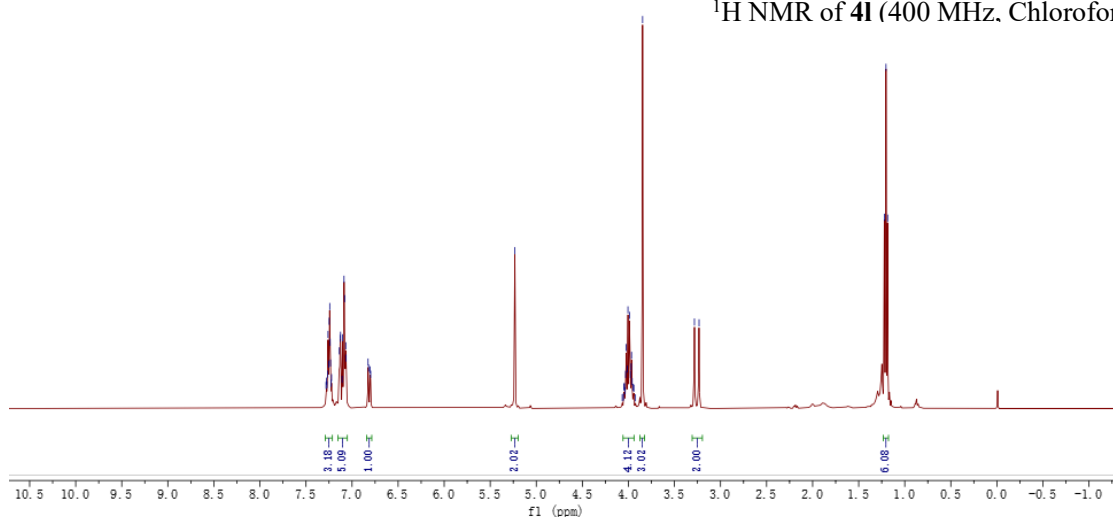

154.17 137.65 131.76 128.90 128.90 128.64 128.23 127.99 126.83 112.45 110.95 103.91 103.83 100.96 62.16 62.09 55.95 50.31 29.78 23.96 22.53 16.54 16.40

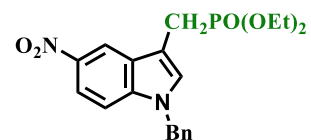

<sup>13</sup>C NMR of **4I** (101 MHz, Chloroform-*d*)

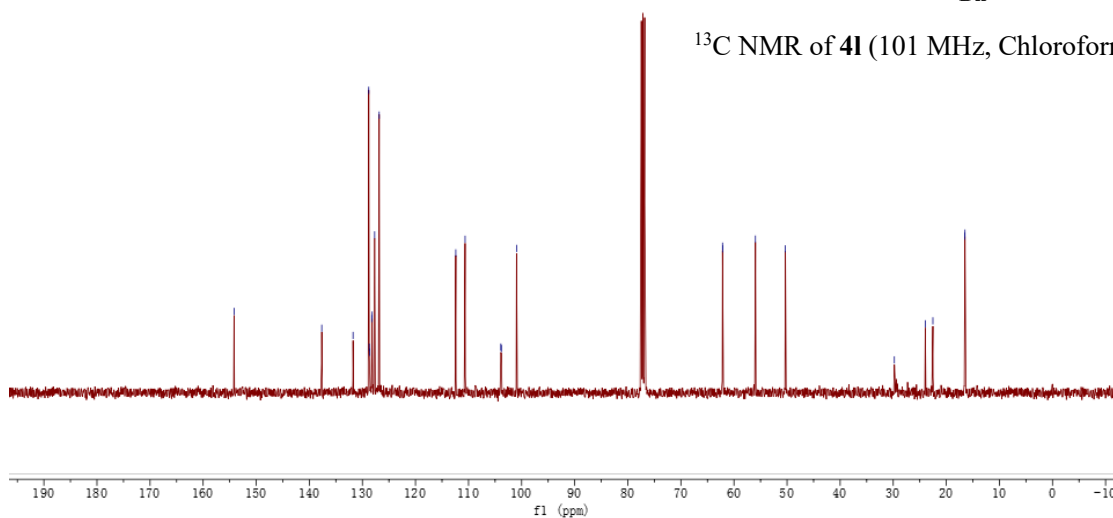

23.18

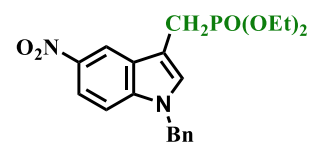

$^{31}\text{P}$  NMR of **41** (162 MHz, Chloroform-*d*)

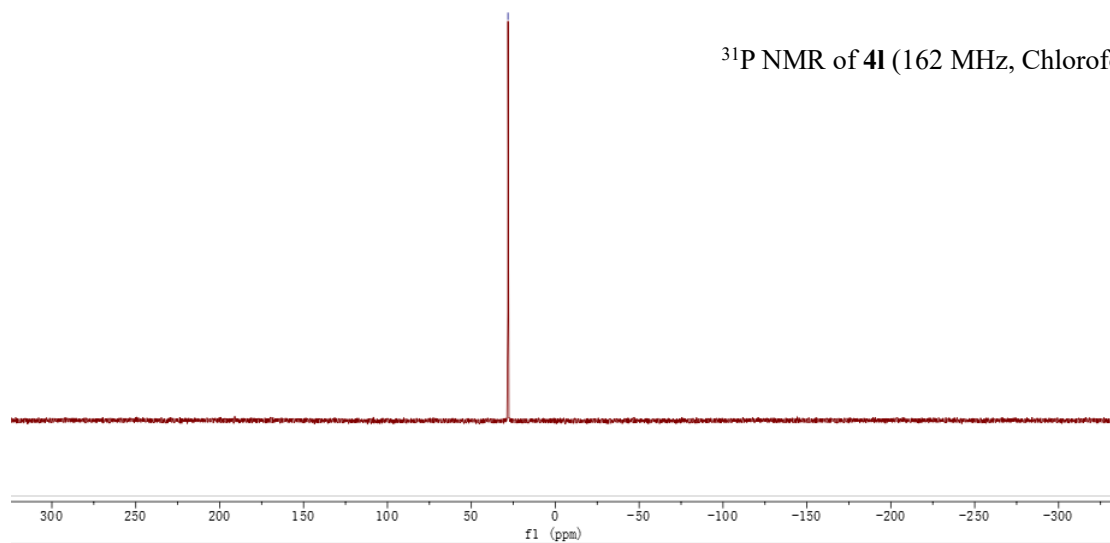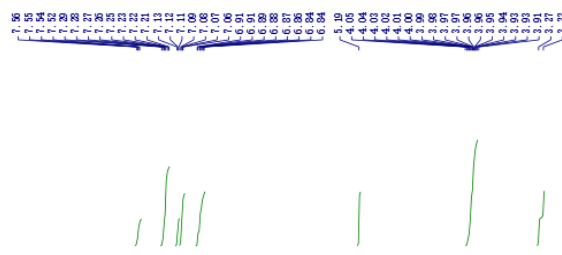

$^1\text{H}$  NMR of **4m** (400 MHz, Chloroform-*d*)

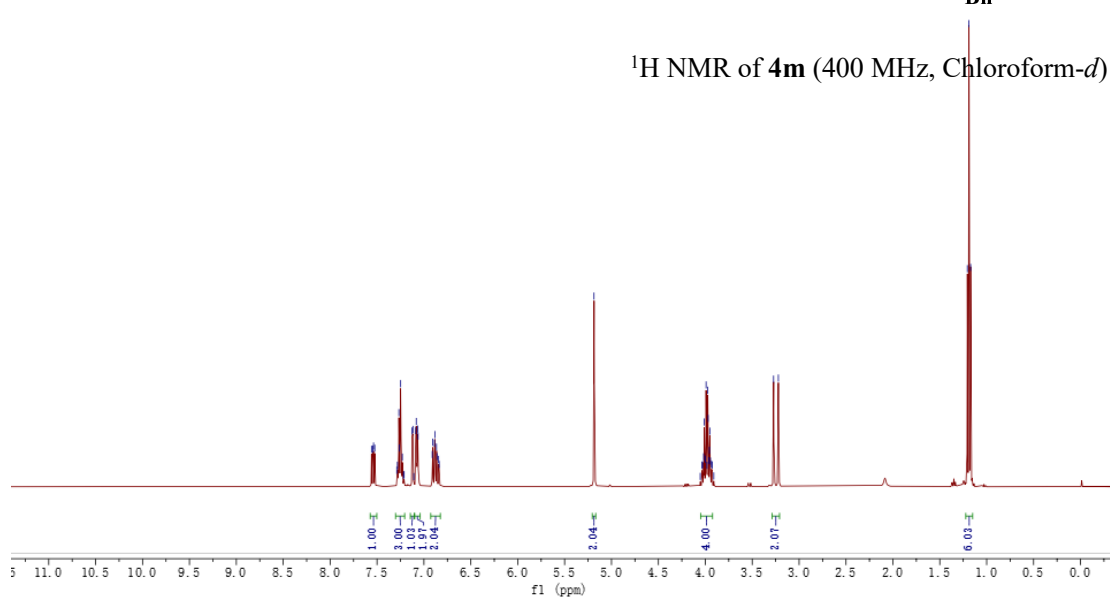

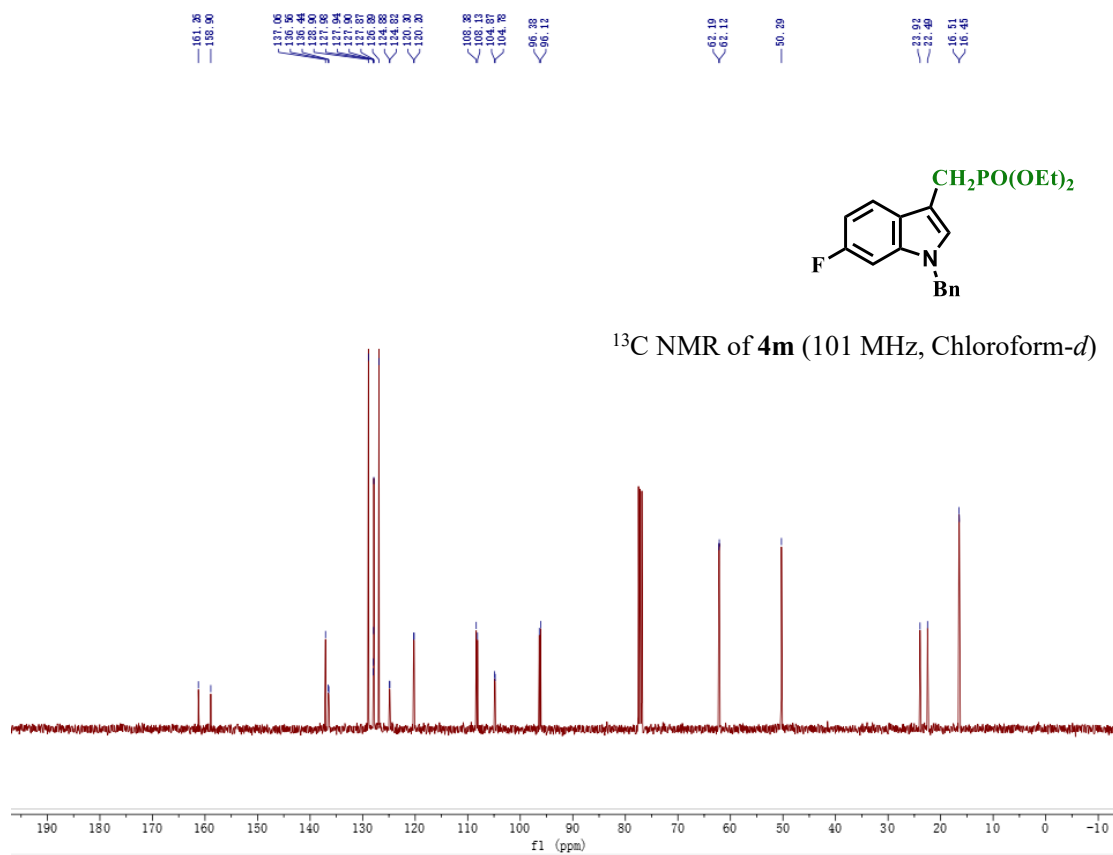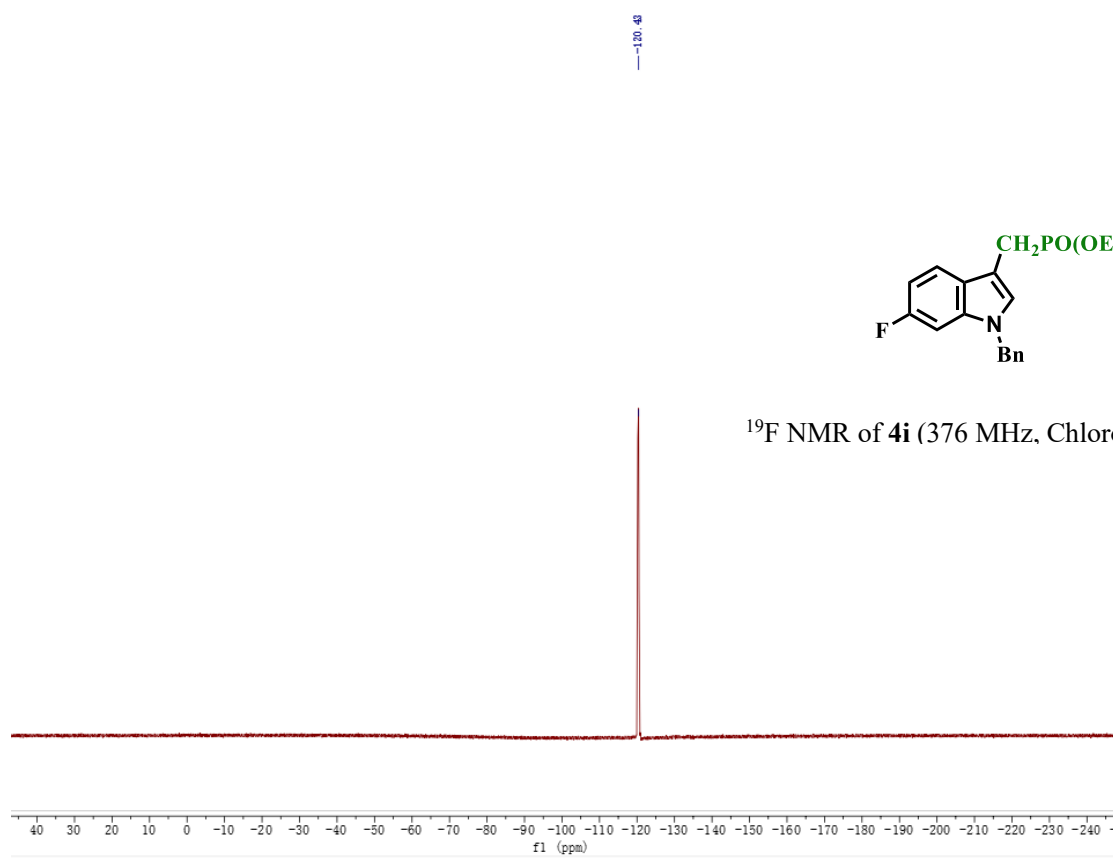

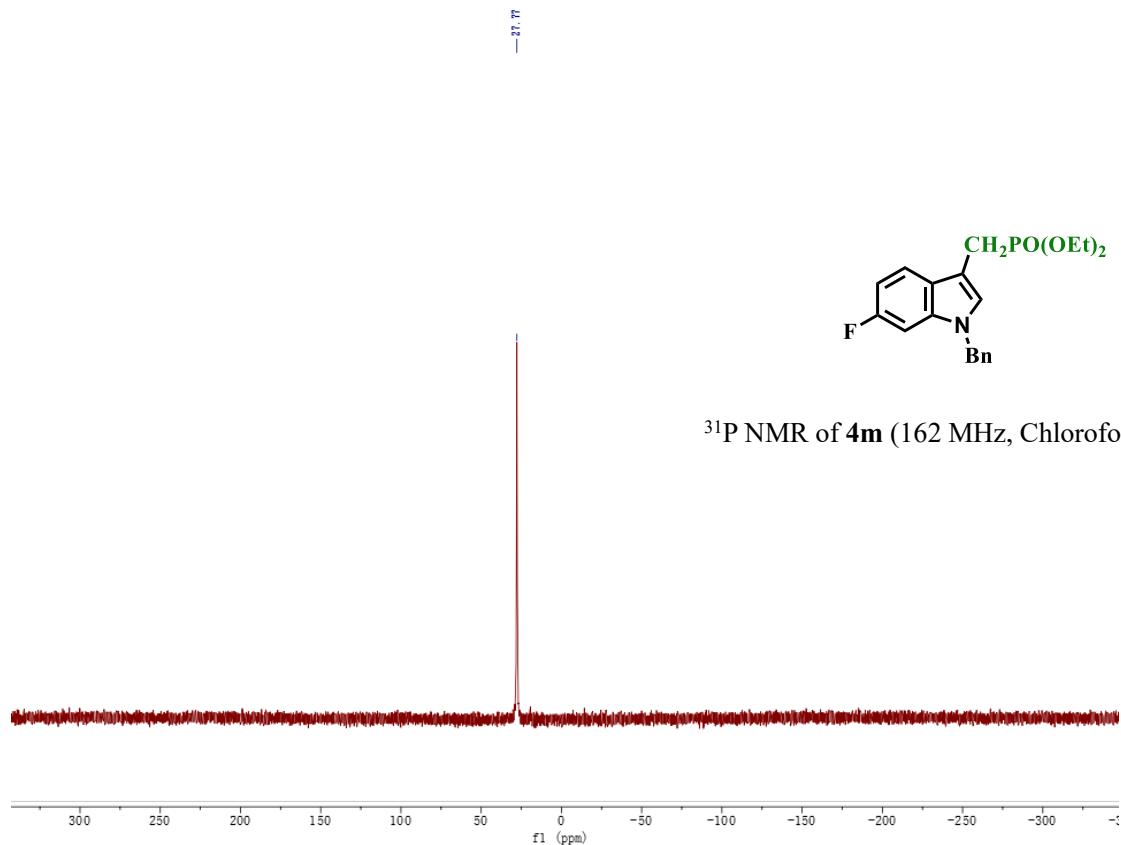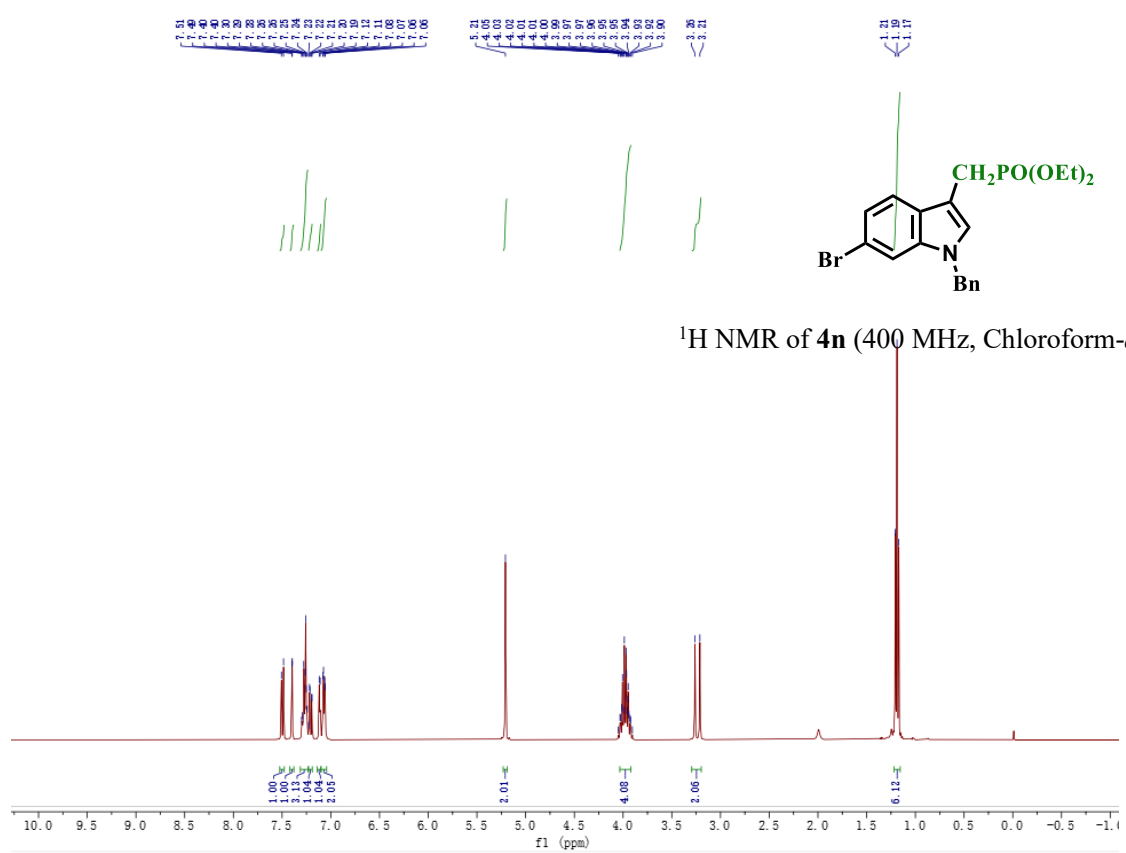

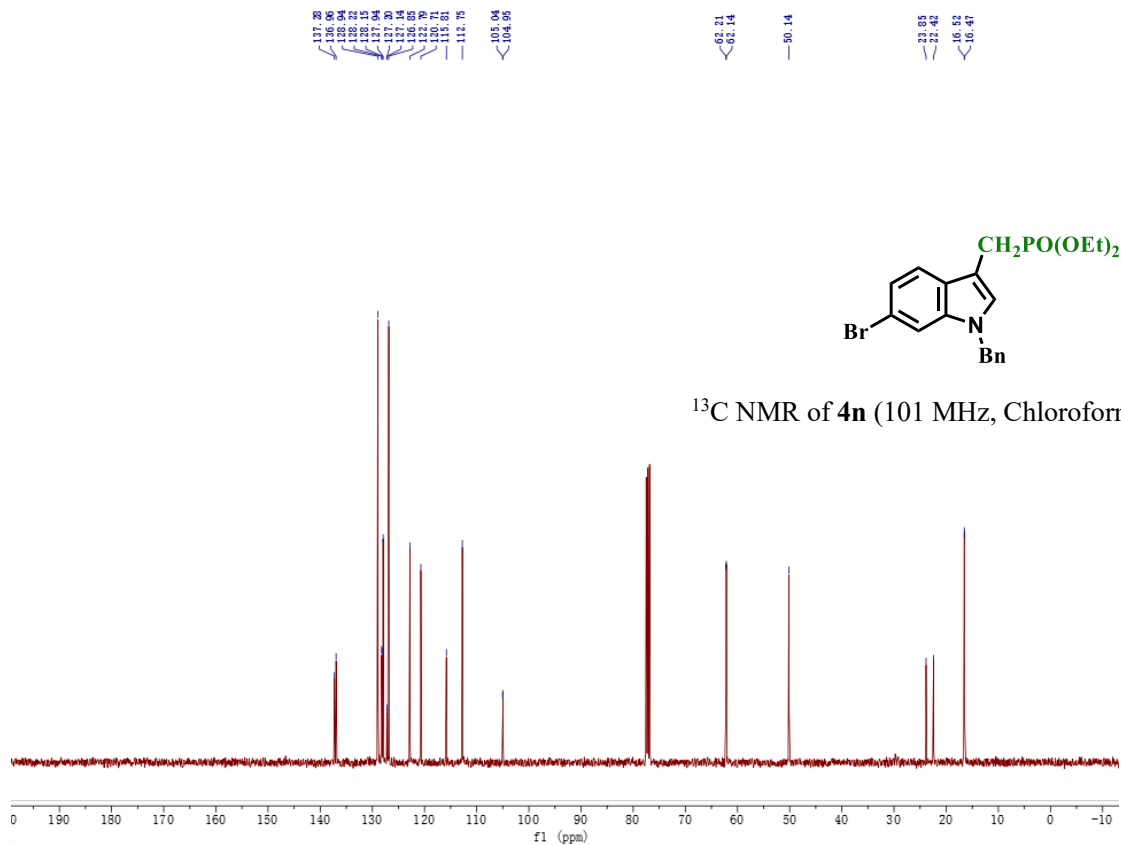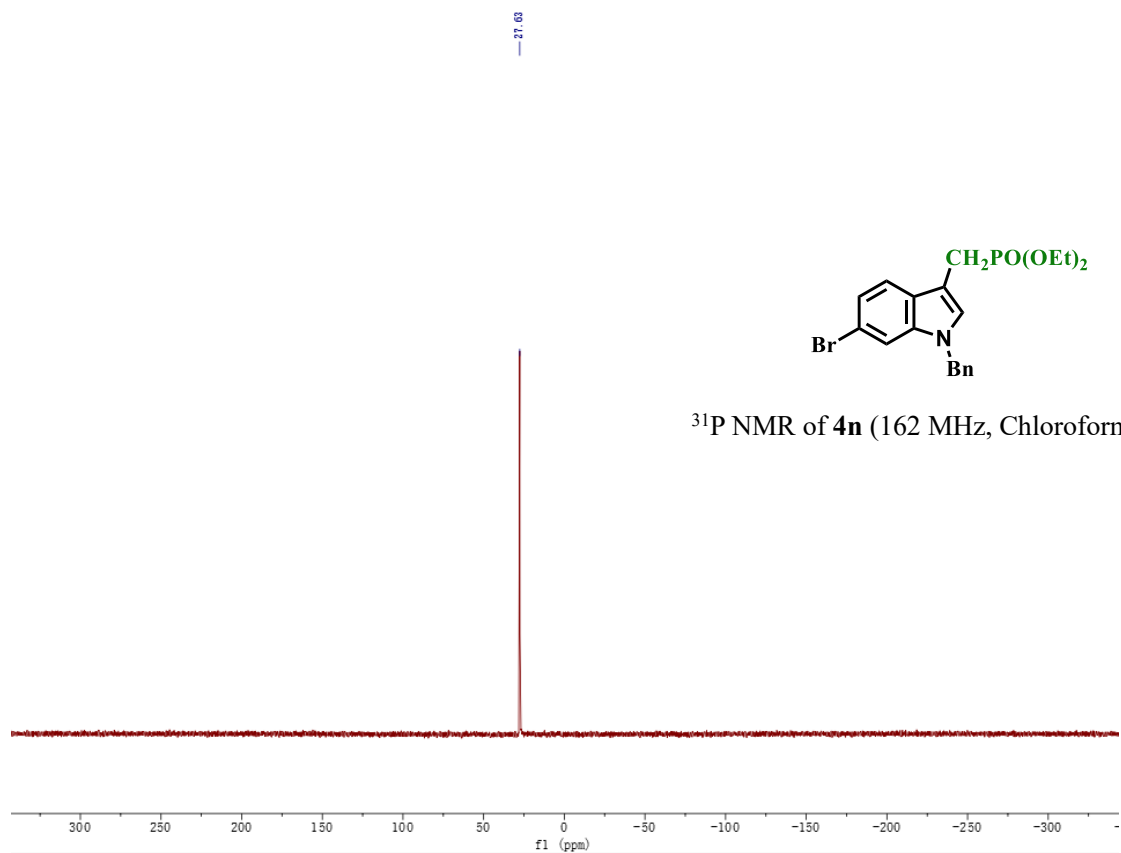

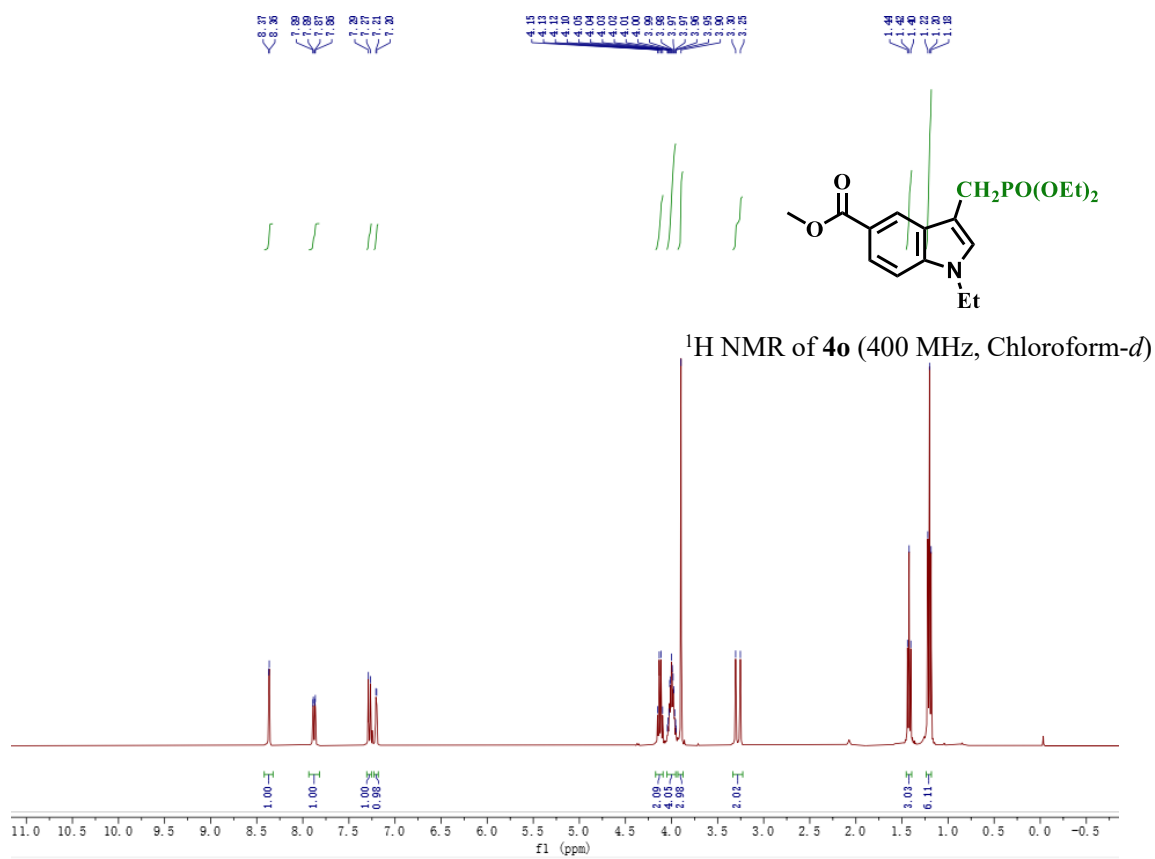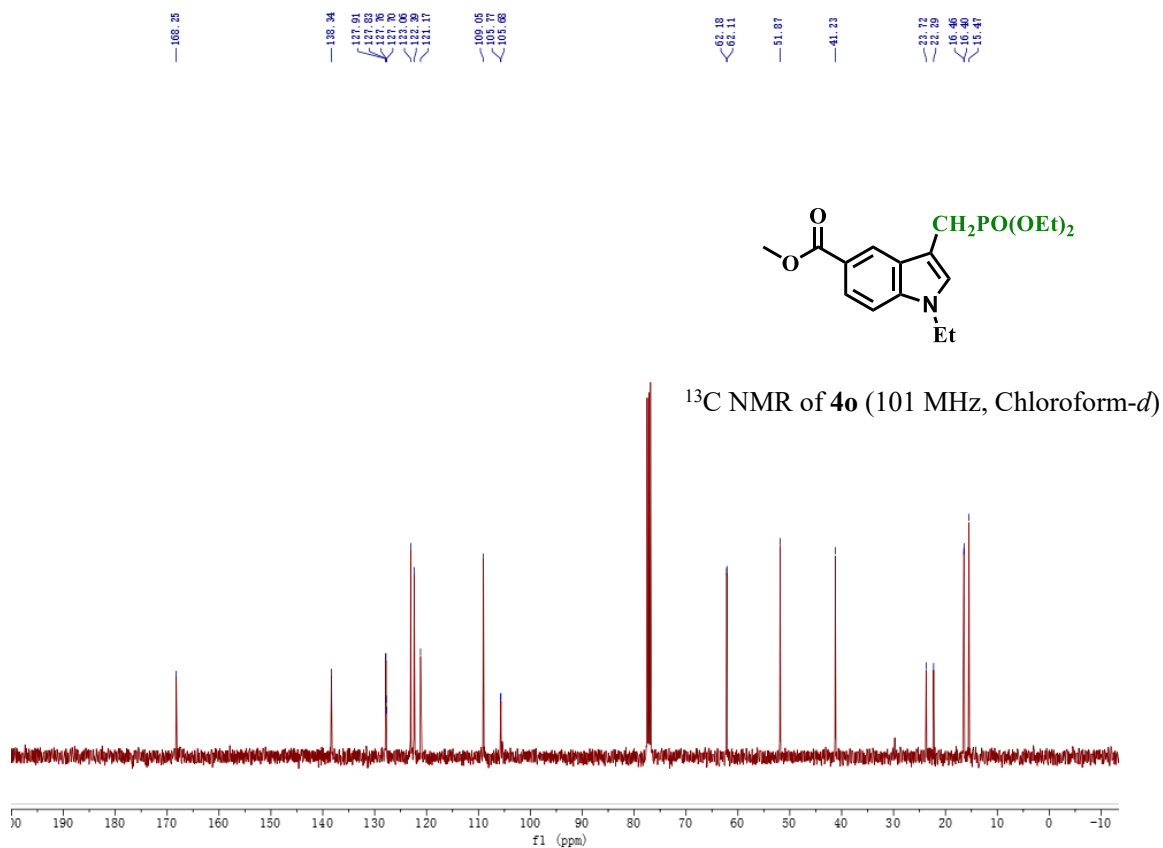

-31.68

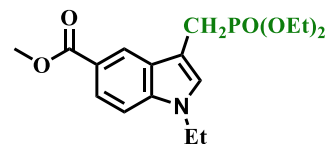

$^{31}\text{P}$  NMR of **4o** (162 MHz, Chloroform-*d*)

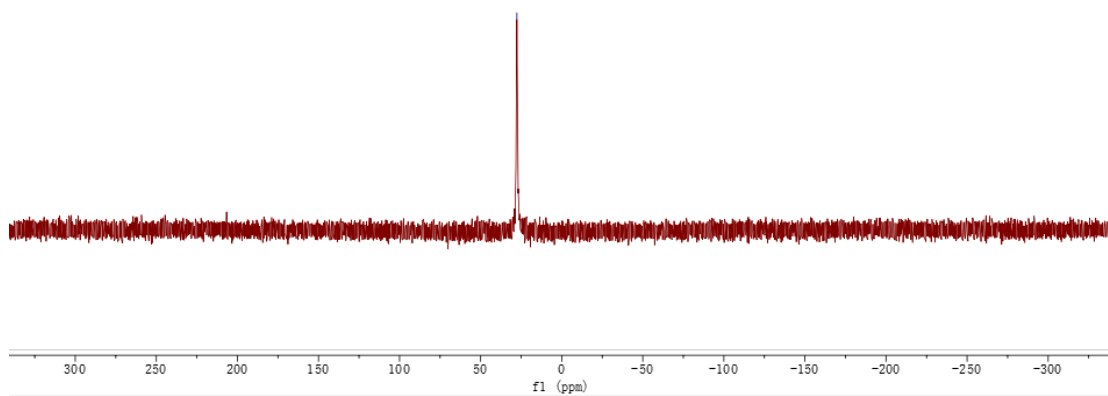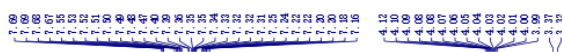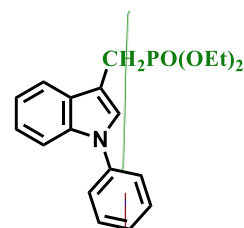

$^1\text{H}$  NMR of **4p** (400 MHz, Chloroform-*d*)

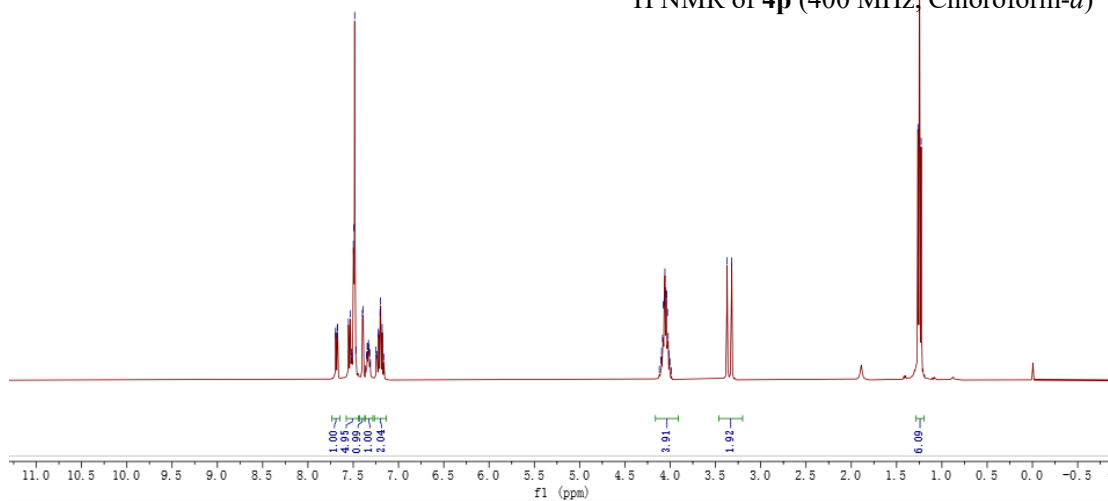



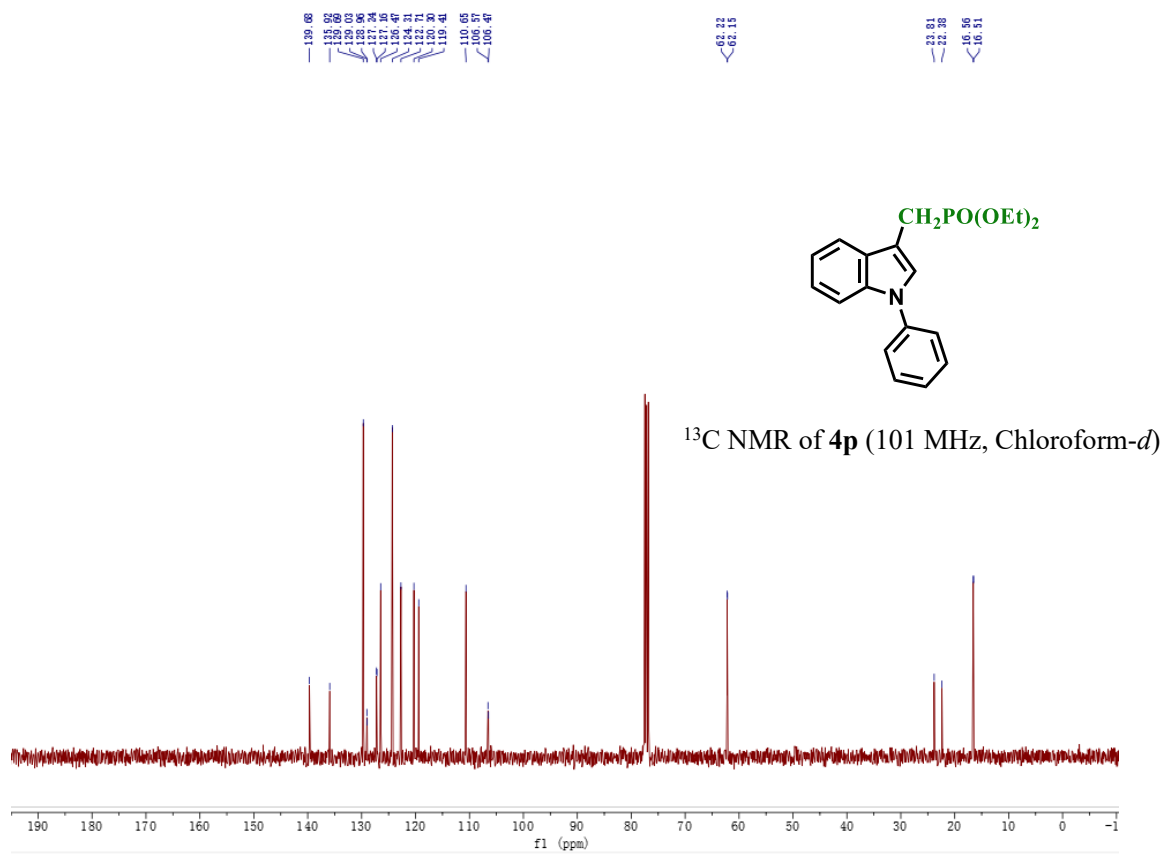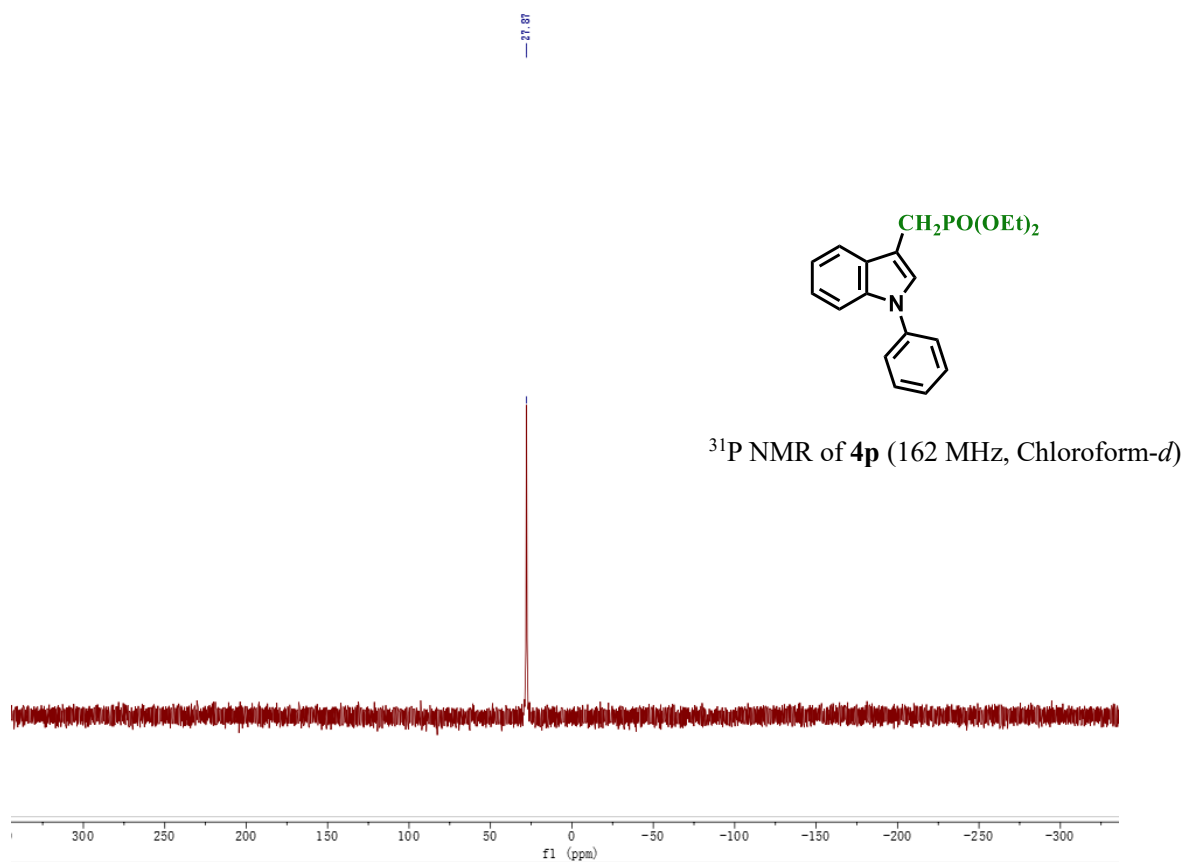

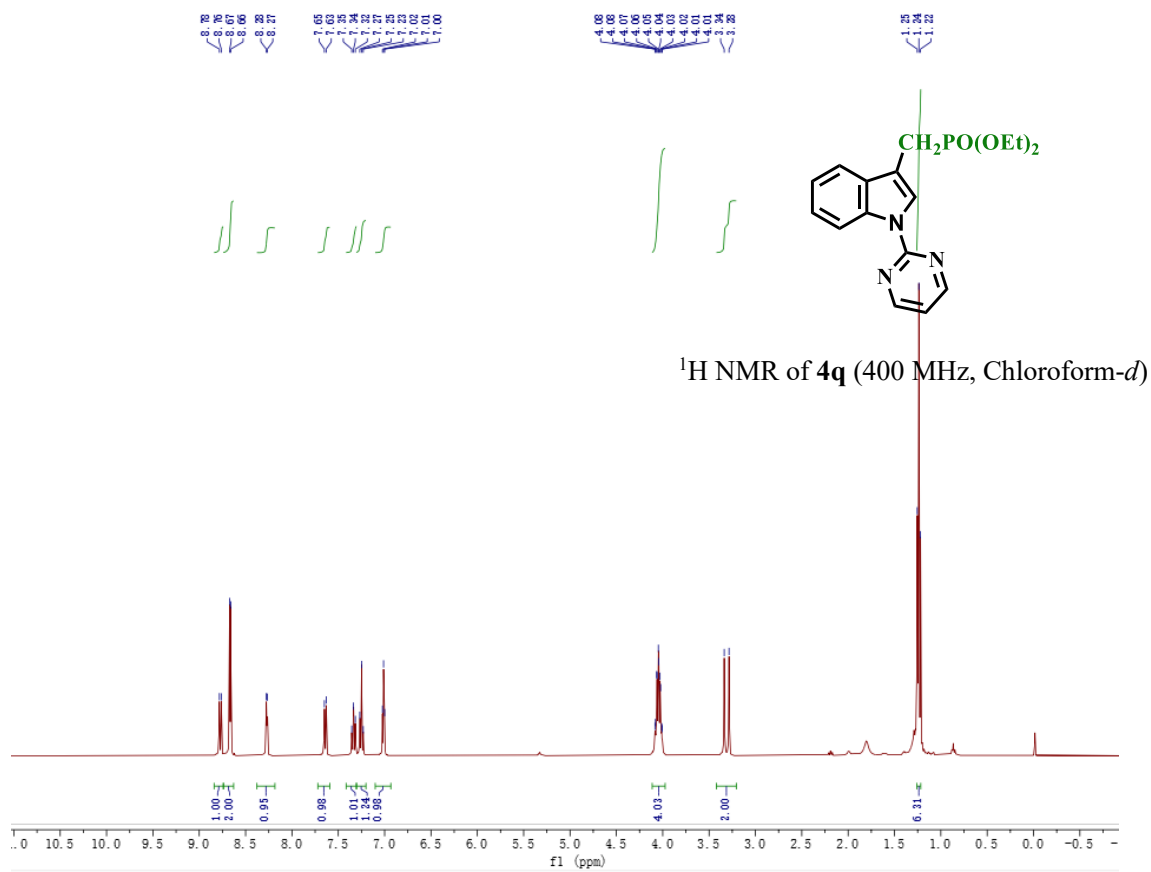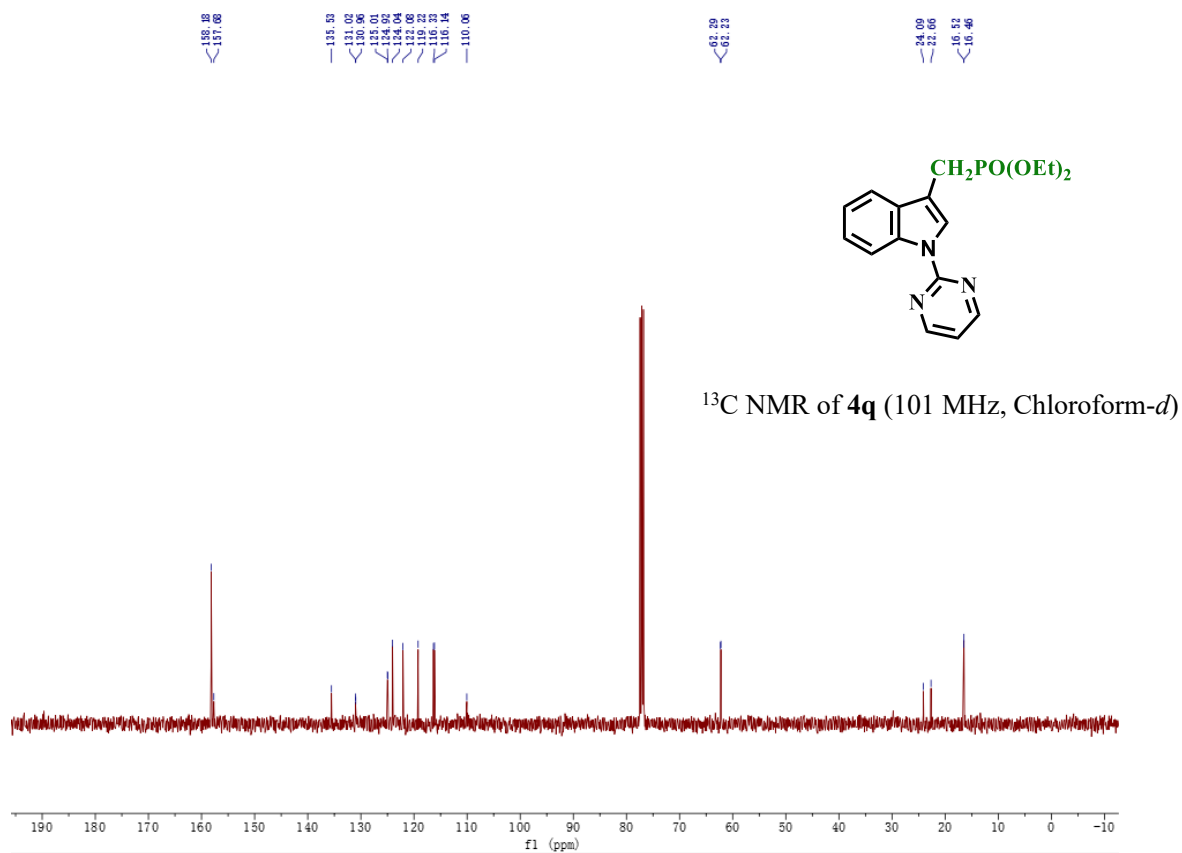

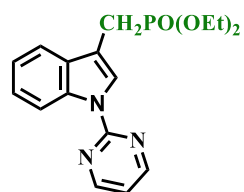

<sup>31</sup>P NMR of **4q** (162 MHz, Chloroform-*d*)

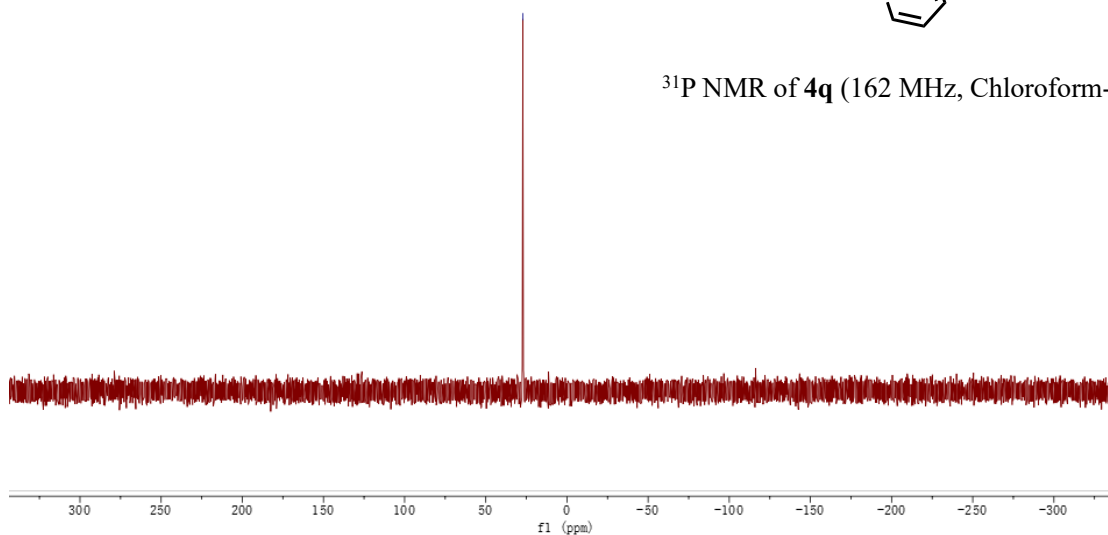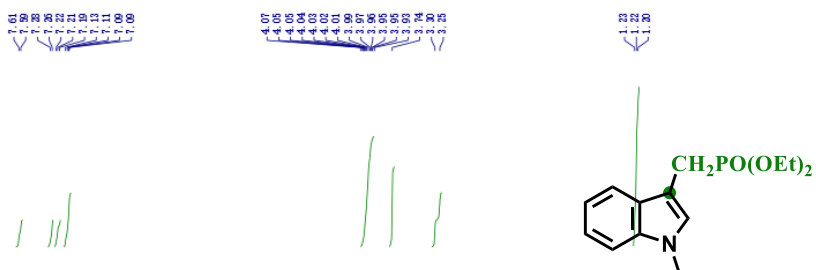

<sup>1</sup>H NMR of **4r** (400 MHz, Chloroform-*d*)

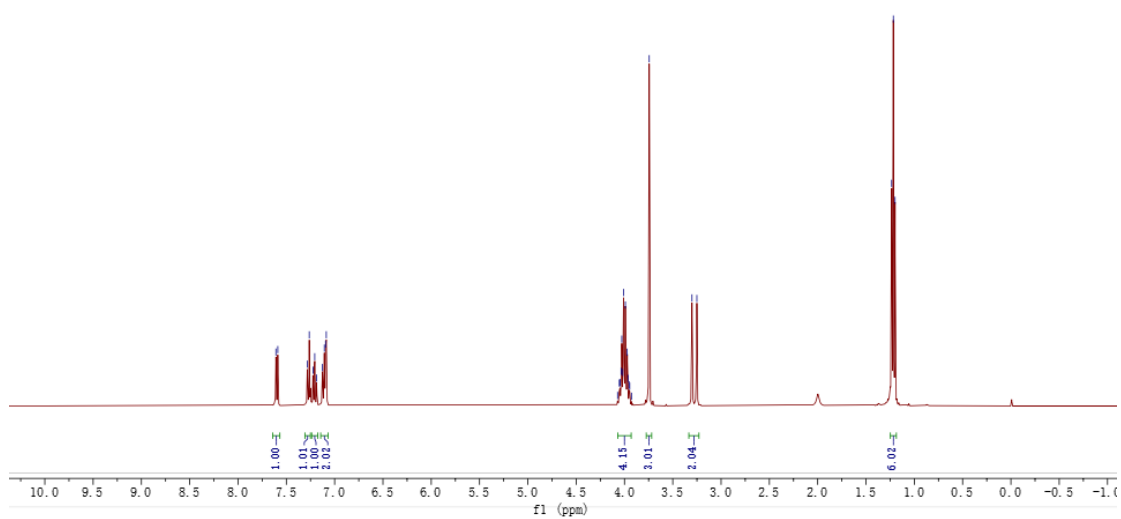

136.85  
128.25  
128.08  
128.02  
121.76  
119.13  
118.03  
109.20  
103.99  
103.49

62.12  
62.05

32.83  
22.72  
22.59  
16.51  
16.44

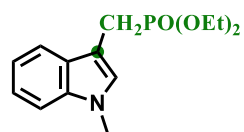

<sup>13</sup>C NMR of **4r** (101 MHz, Chloroform-*d*)

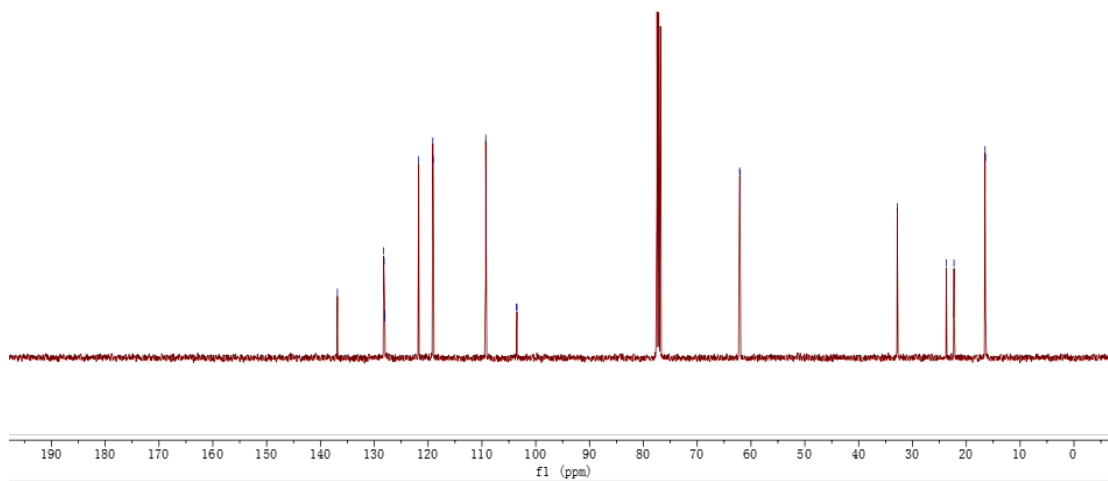

26.31

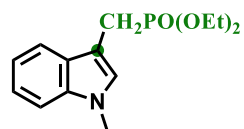

<sup>31</sup>P NMR of **4r** (162 MHz, Chloroform-*d*)

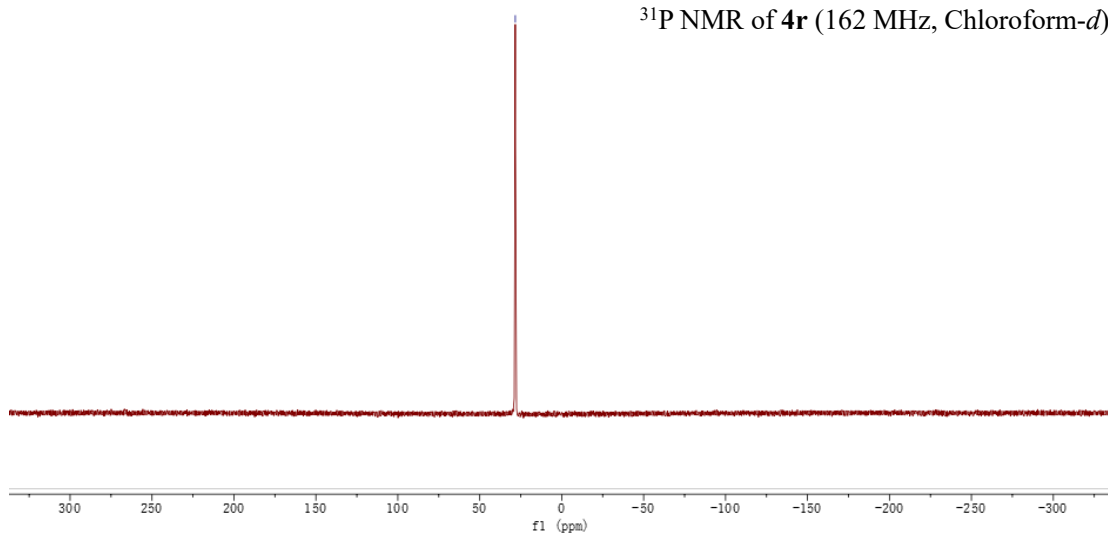

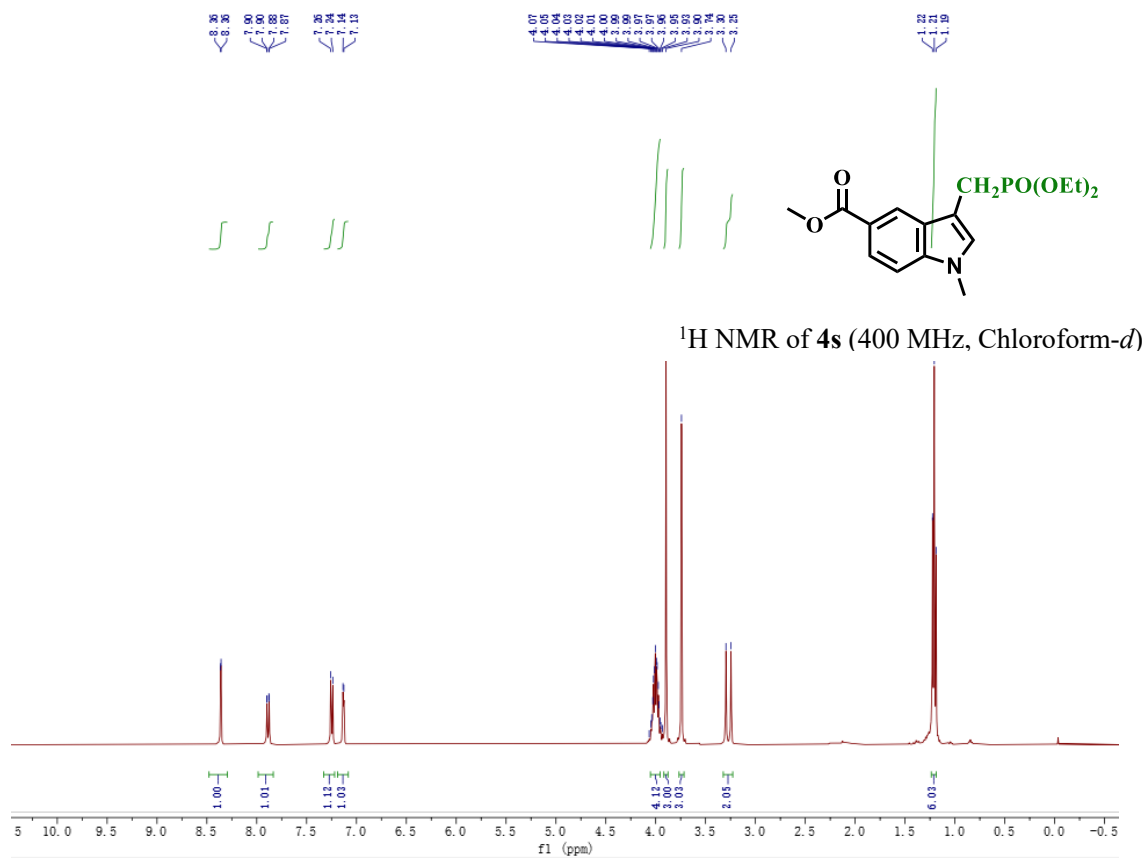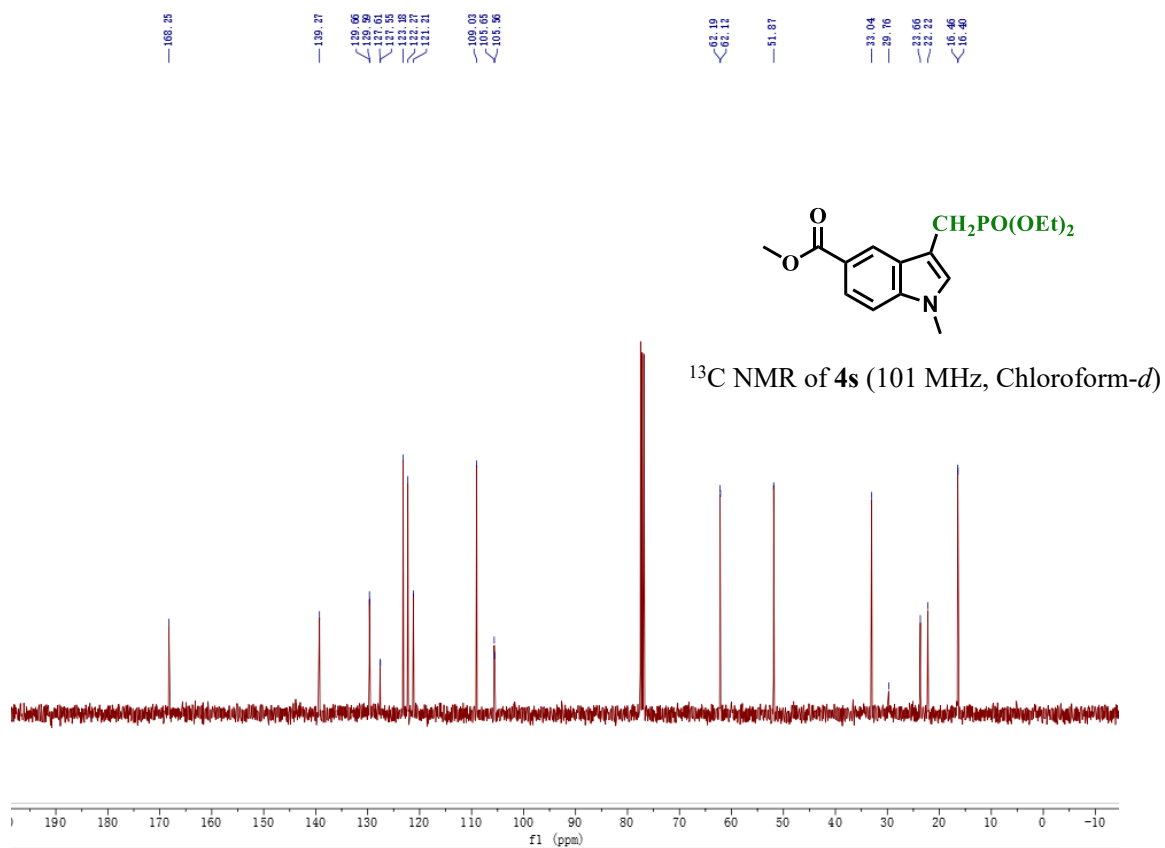

— 27.05

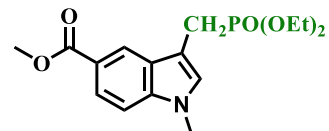

<sup>31</sup>P NMR of 4s (162 MHz, Chloroform-*d*)

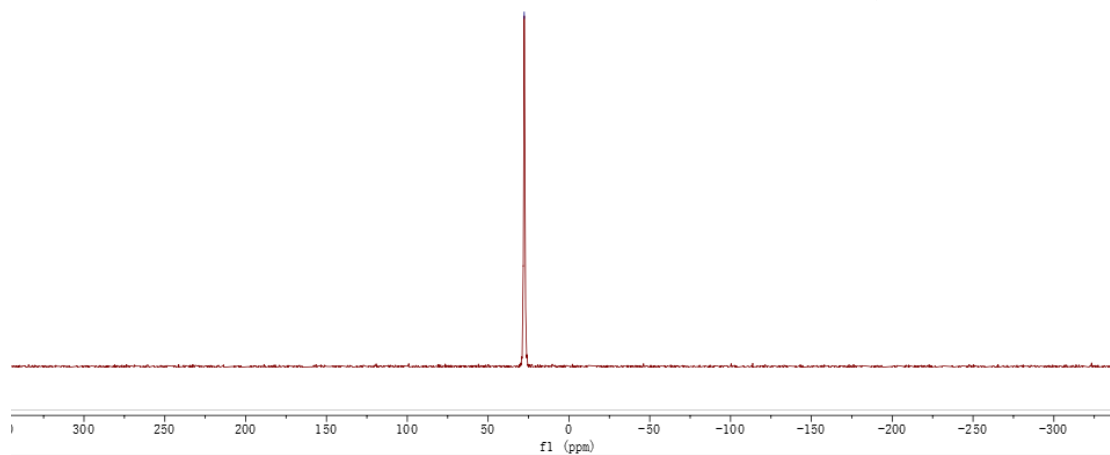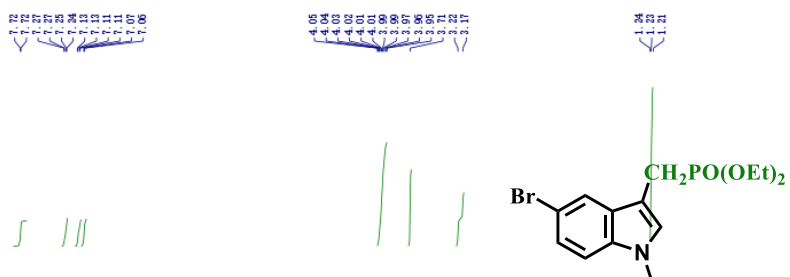

<sup>1</sup>H NMR of 4t (400 MHz, Chloroform-*d*)

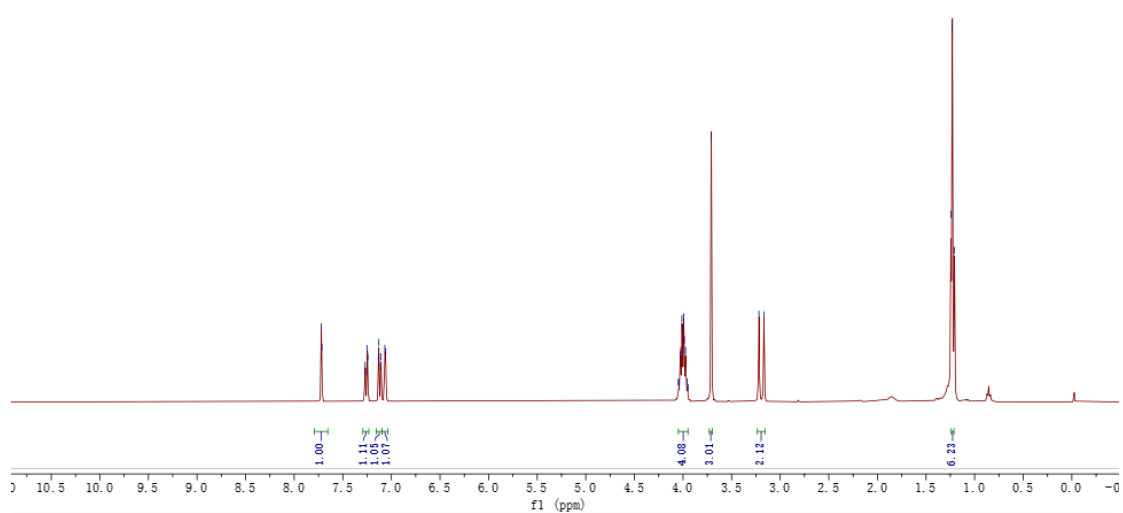

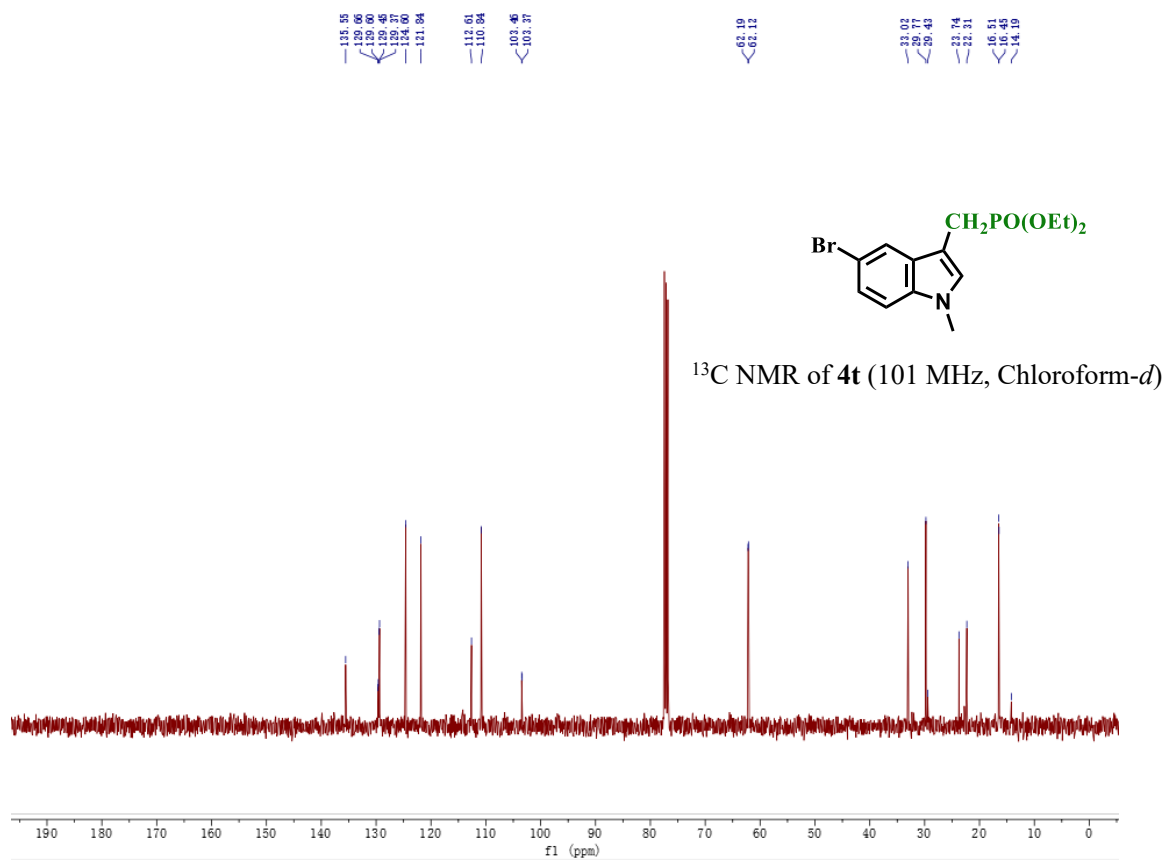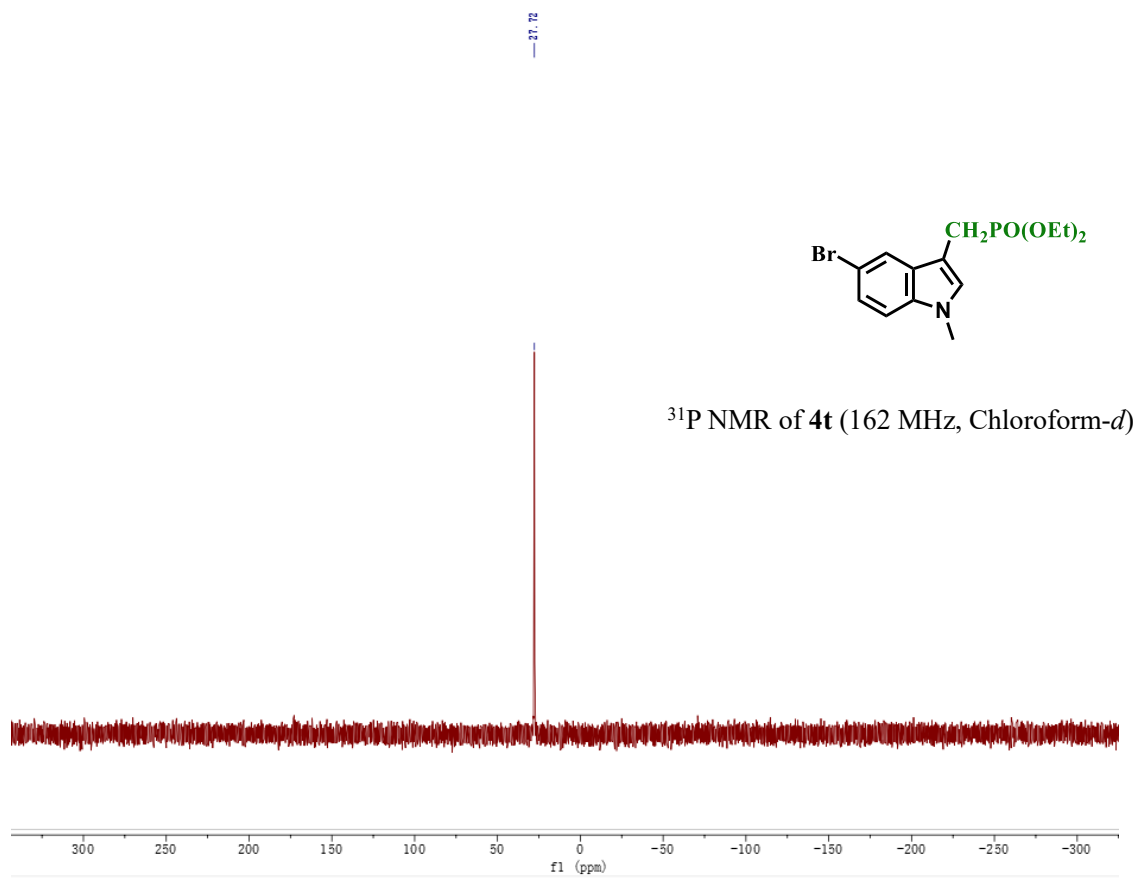

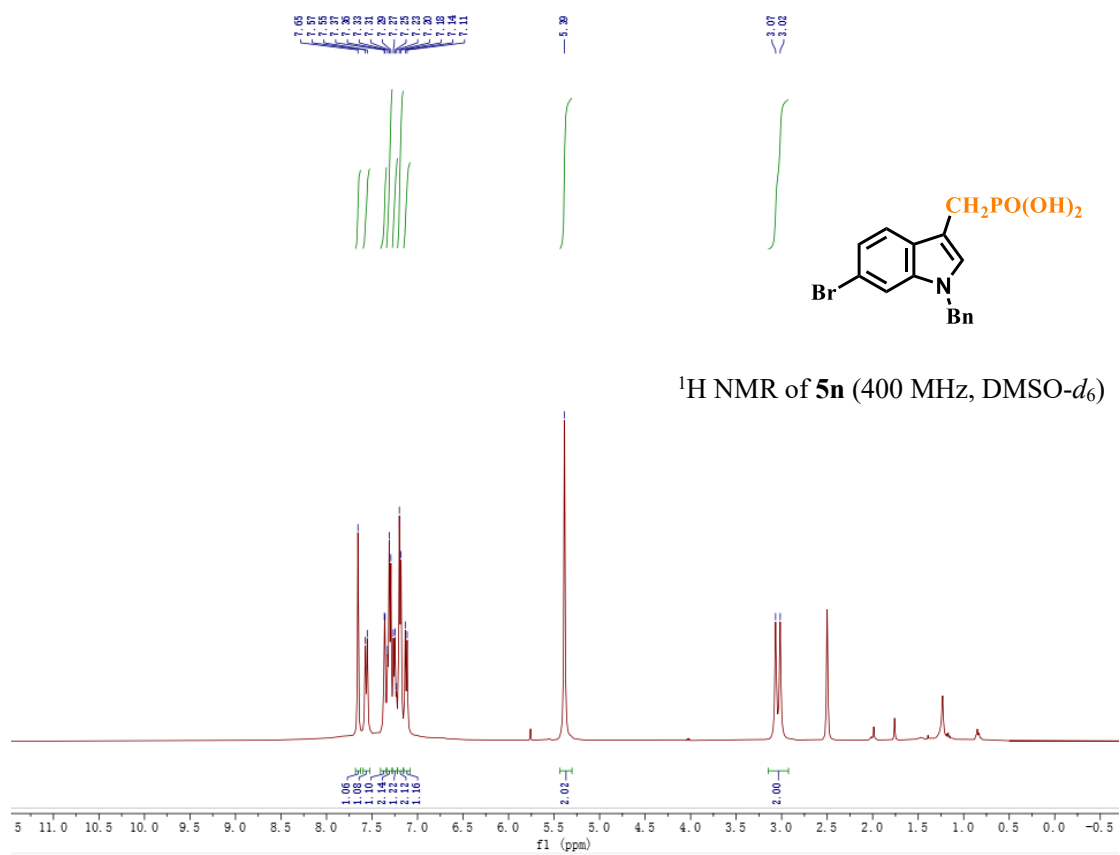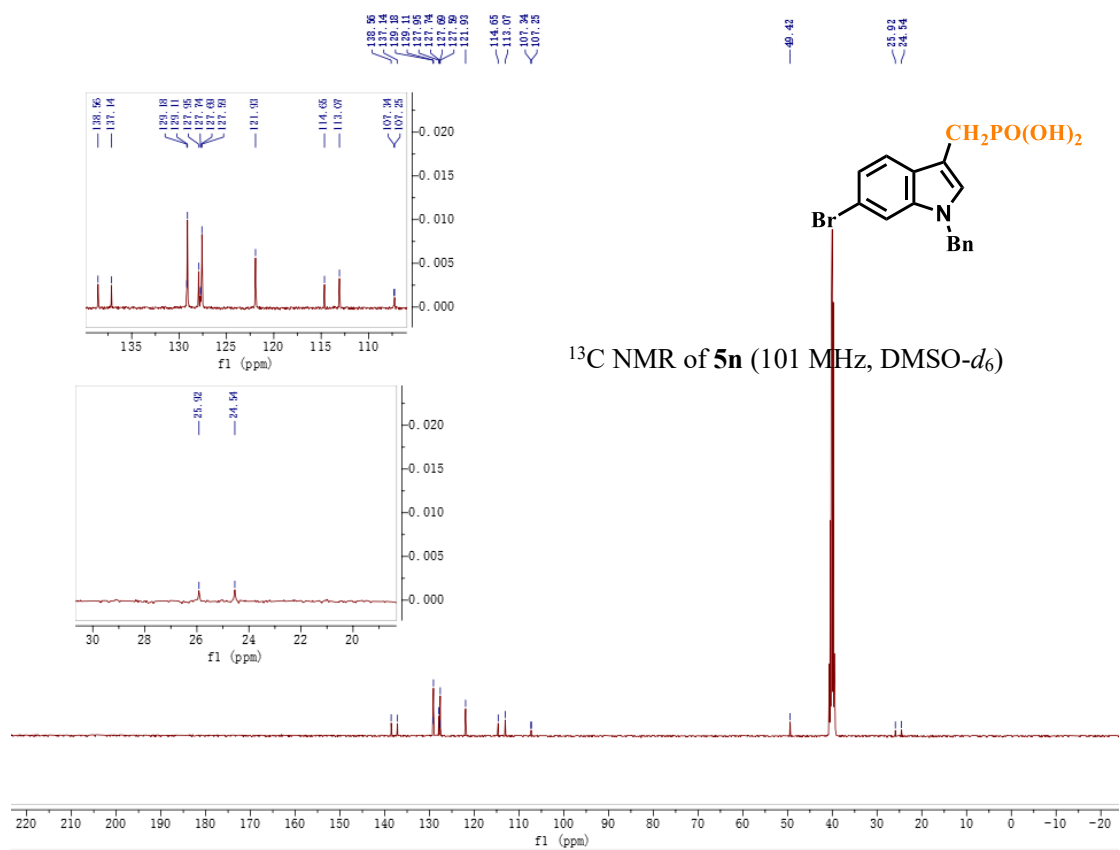



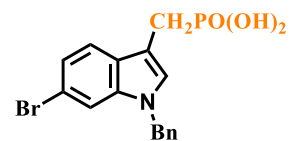

$^{31}\text{P}$  NMR of **5n** (162 MHz,  $\text{DMSO-}d_6$ )

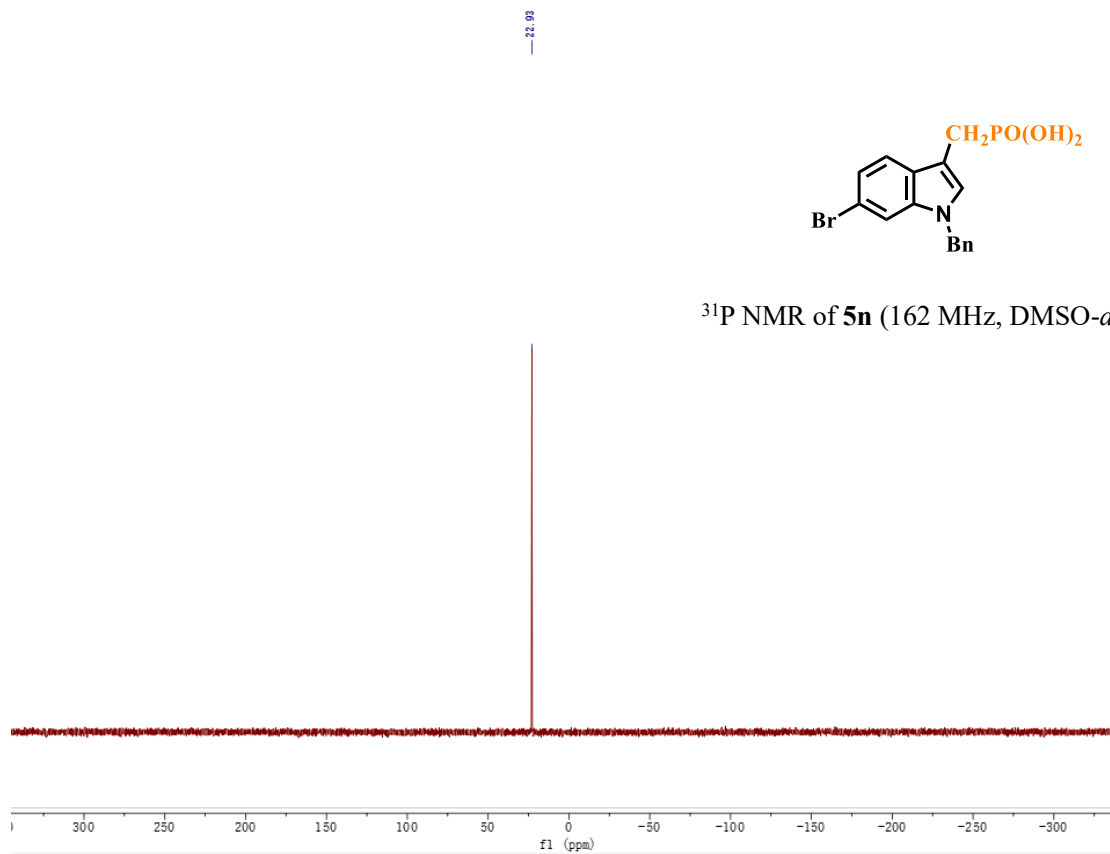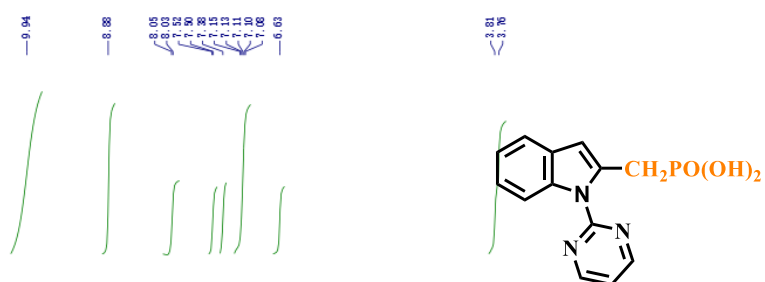

$^1\text{H}$  NMR of **5h** (400 MHz,  $\text{DMSO-}d_6$ )

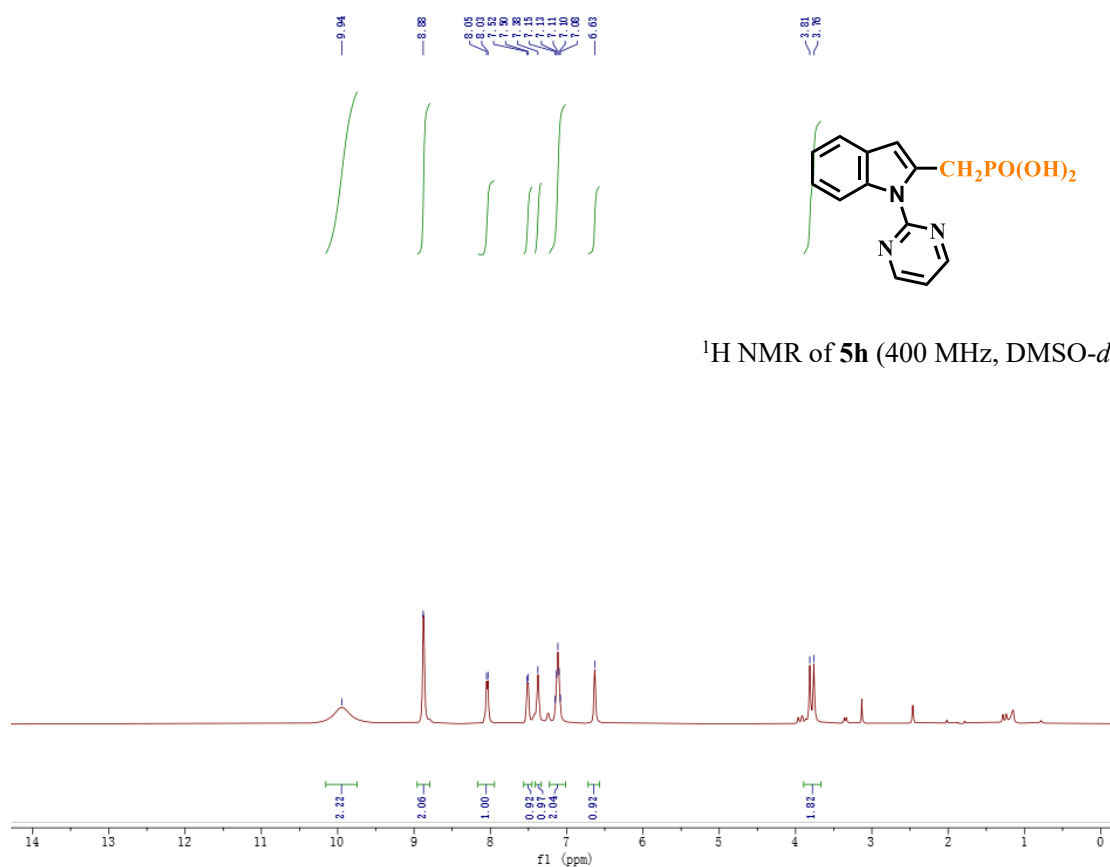

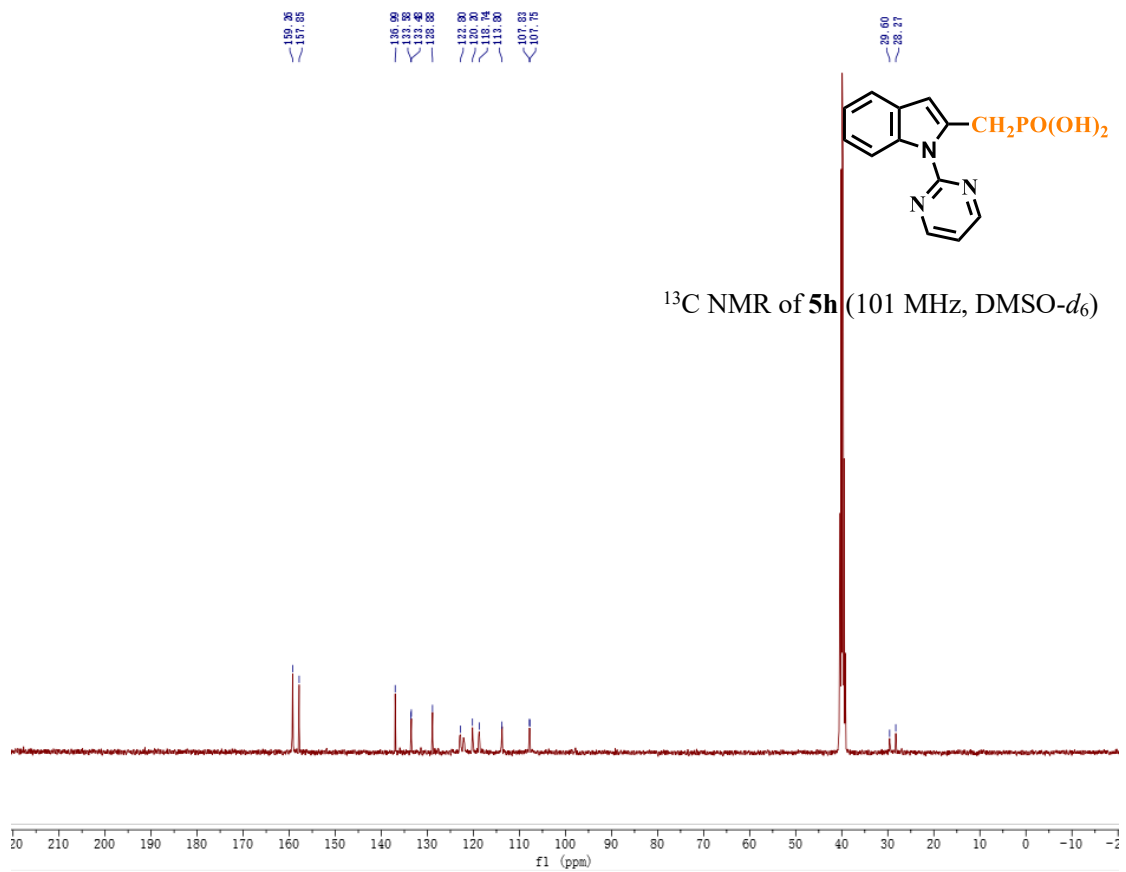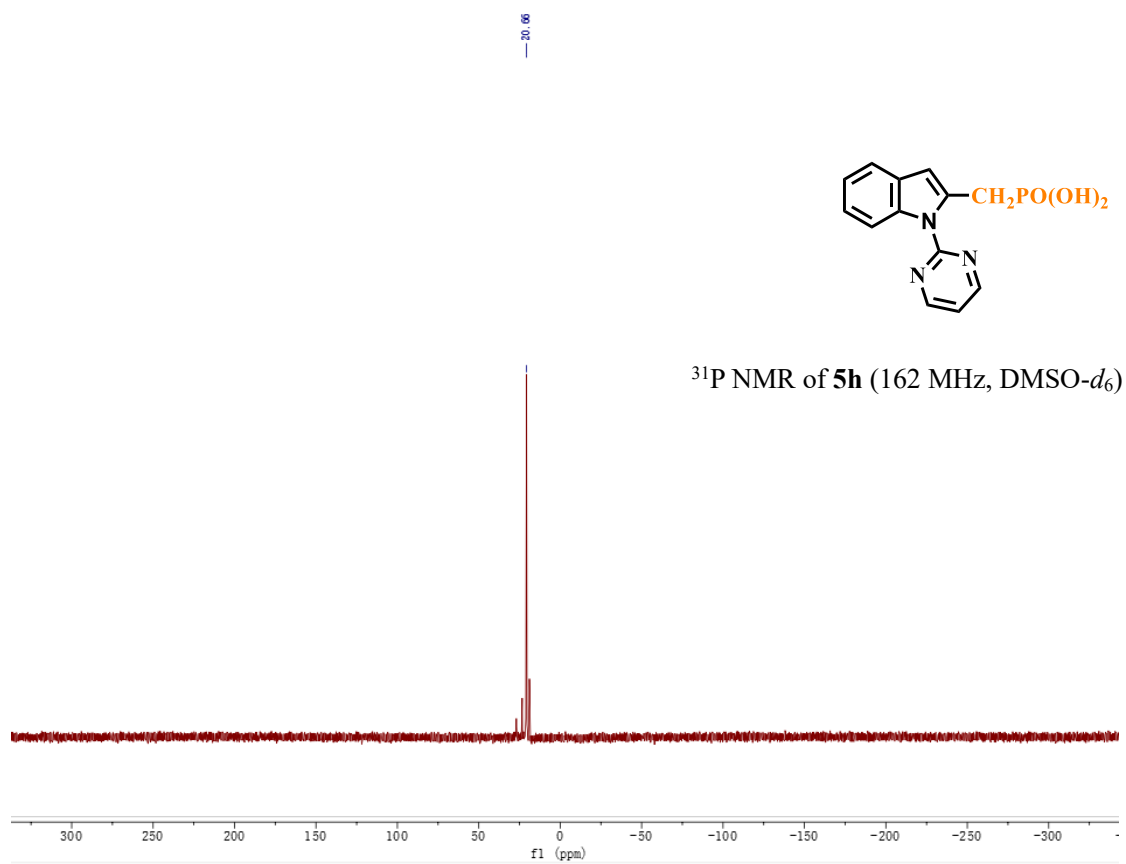

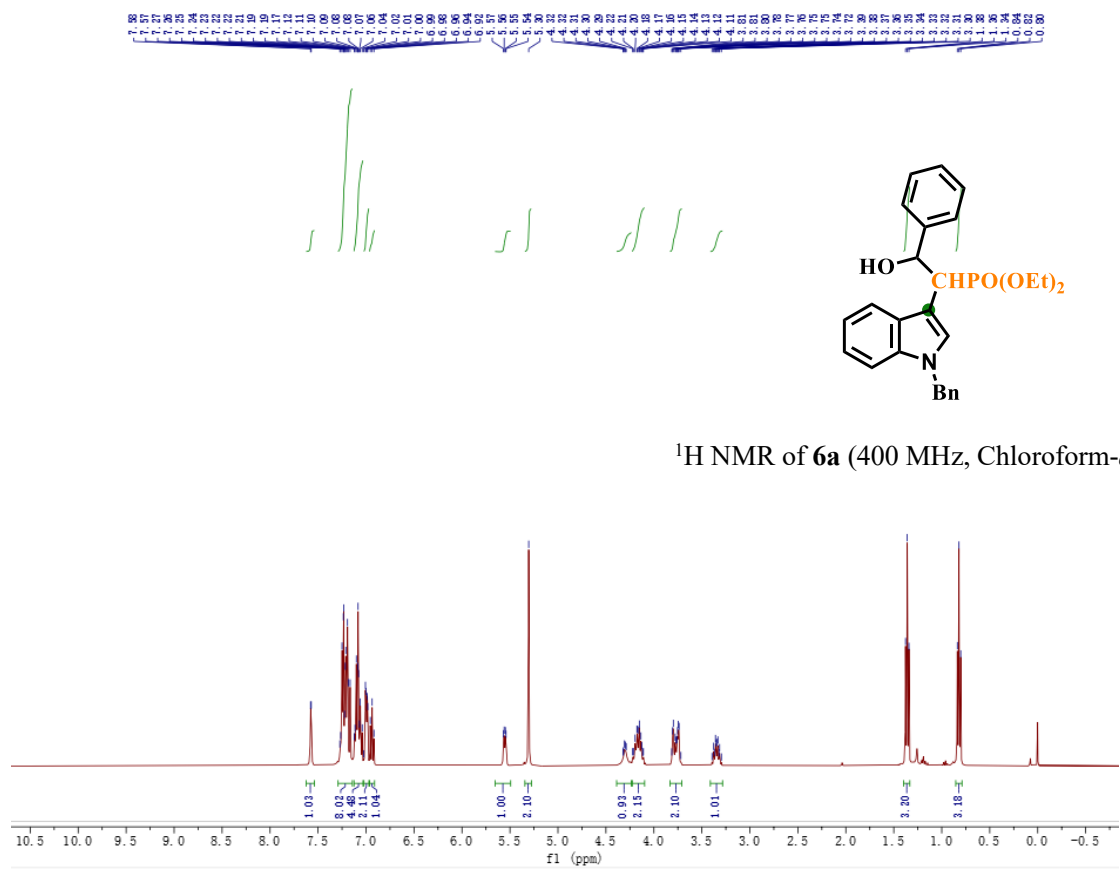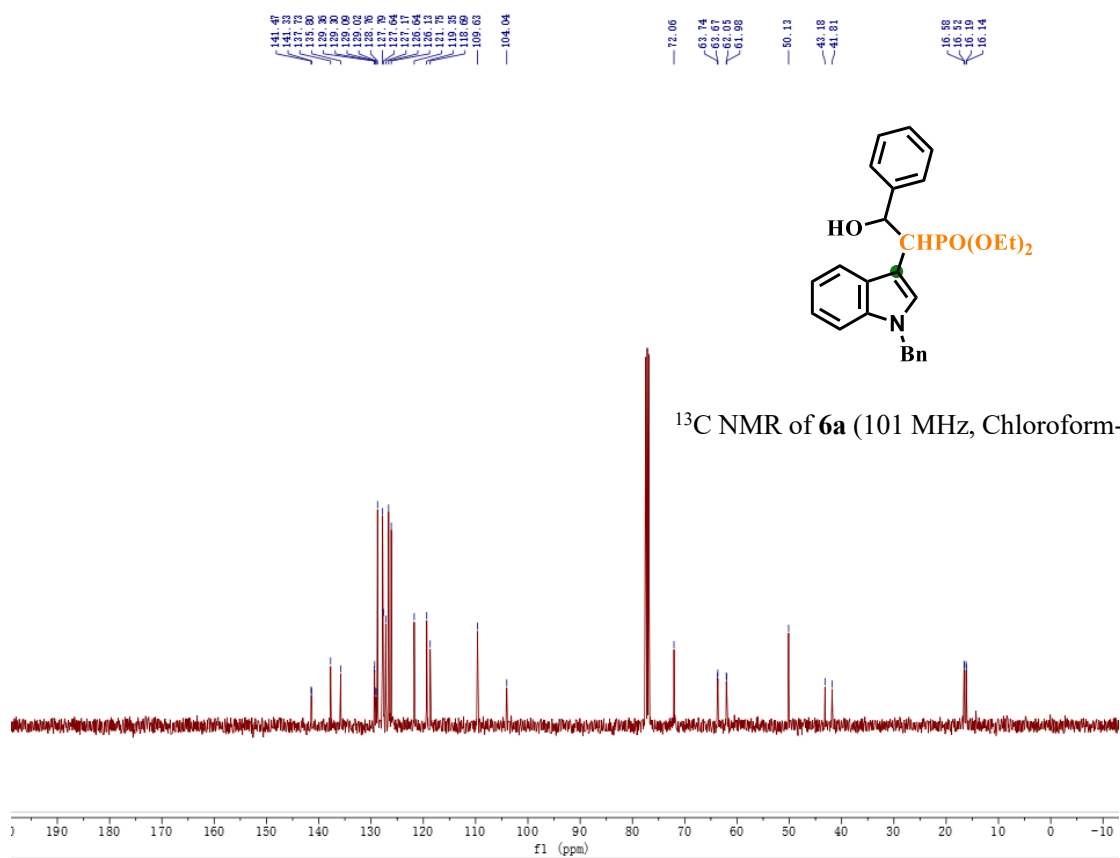

—28.42

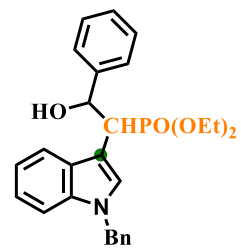

<sup>31</sup>P NMR of **6a** (162 MHz, Chloroform-*d*)

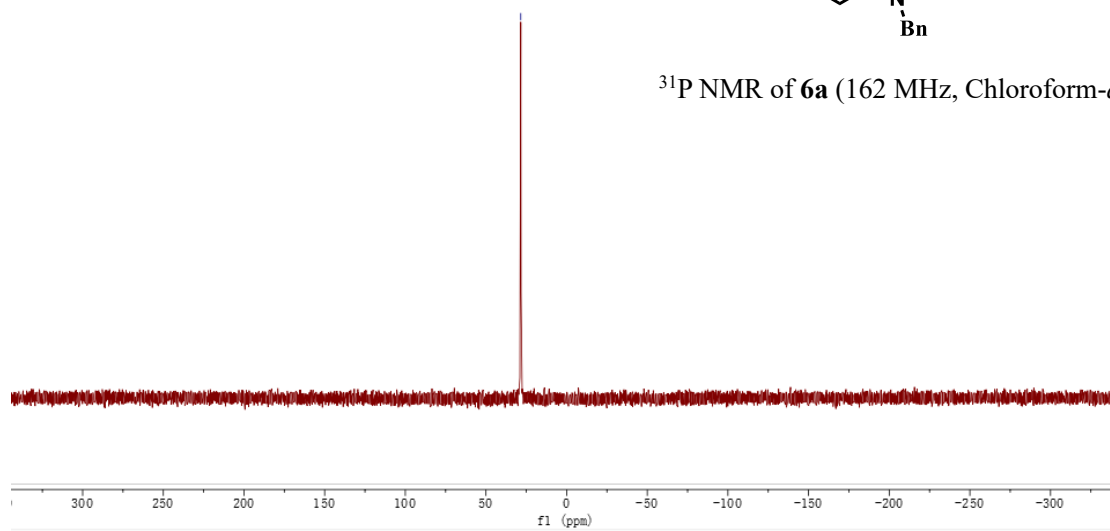

## 11. References.

1. P. L. McGinley and J. T. Koh, Circumventing Anti-Androgen Resistance by Molecular Design, *J. Am. Chem. Soc.*, 2007, **129**, 3822-3823.
2. K. Nemoto, S. Tanaka, M. Konno, S. Onozawa, M. Chiba, Y. Tanaka, Y. Sasaki, R. Okubo and T. Hattori, Me<sub>2</sub>AlCl-Mediated Carboxylation, Ethoxycarbonylation, and Carbamoylation of Indoles, *Tetrahedron*, 2016, **72**, 734-745.
3. A. Das, K. Watanabe, H. Morimoto and T. Ohshima, Boronic Acid Accelerated Three-Component Reaction for the Synthesis of  $\alpha$ -Sulfanyl-Substituted Indole-3-acetic Acids, *Org. Lett.*, 2017, **19**, 5794-5797.
4. M. Arisawa, Y. Terada, K. Takahashi, M. Nakagawa and A. Nishida, Development of Isomerization and Cycloisomerization with Use of a Ruthenium Hydride with N-Heterocyclic Carbene and Its Application to the Synthesis of Heterocycles, *J. Org. Chem.*, 2006, **71**, 4255-4261.
5. J. N. Brantley, A. V. Samant and F. D. Toste, Isolation and Reactivity of Trifluoromethyl Iodonium Salts, *ACS Cent. Sci.*, 2016, **2**, 341-350.
6. L. Fra, A. Millan, J. A. Souto and K. Muniz, Indole Synthesis Based on a Modified Koser Reagent, *Angew. Chem., Int. Ed.*, 2014, **53**, 7349-7353.
7. H. C. Hsu and D. R. Hou, Reduction of 1-Pyrrolyl and 1-Indolyl Carbamates to Hemiaminals, *Tetrahedron Lett.*, 2009, **50**, 7169-7171.
8. T. Mandal, G. Chakraborti, S. Karmakar and J. Dash, Divergent and Orthogonal Approach to Carbazoles and Pyridoindoles from Oxindoles via Indole Intermediates, *Org. Lett.*, 2018, **20**, 4759-4763.
9. S. A. Iqbal, J. Cid, R. J. Procter, M. Uzelac, K. Yuan and M. J. Ingleson, Acyl-Directed ortho-Borylation of Anilines and C7 Borylation of Indoles using just BBr<sub>3</sub>, *Angew. Chem., Int. Ed.*, 2019, **58**, 15381-15385.
10. A. F. Maier, S. Tussing, T. Schneider, U. Florke, Z. W. Qu, S. Grimme and J. Paradies, Frustrated Lewis Pair Catalyzed Dehydrogenative Oxidation of Indolines and Other Heterocycles, *Angew. Chem., Int. Ed.*, 2016, **55**, 12219-12223.
11. X. Sun, X. J. Zhao and B. Wu, Metal - Free Hypervalent - Iodine - Promoted C3 Difluorination and C2 Oxidation of N - Substituted Indoles, *Asian J. Org. Chem.*, 2017, **6**, 690-693.
12. D. A. Evans, K. R. Fandrick, H. J. Song, K. A. Scheidt and R. Xu, Enantioselective Friedel-Crafts Alkylations Catalyzed by Bis(oxazolonyl)pyridine-Scandium(III) Triflate Complexes, *J. Am. Chem. Soc.*, 2007, **129**, 10029-10041.
13. B. Li, A. E. Wendlandt and S. S. Stahl, Replacement of Stoichiometric DDQ with a Low Potential o-Quinone Catalyst Enabling Aerobic Dehydrogenation of Tertiary Indolines in Pharmaceutical Intermediates, *Org. Lett.*, 2019, **21**, 1176-1181.
14. Y. Wang, Y. Yuan, C. H. Xing and L. Lu, Trifluoromethanesulfonic Acid-Catalyzed Solvent-Free Bisindolylolation of Trifluoromethyl Ketones, *Tetrahedron Lett.*, 2014, **55**, 1045-1048.
15. S. Guo, Z. Zhang, J. Xu, S. Li, Z. Fu and H. Cai, Acid and 1, 2 - Dichloroethane Co - Promoted Substitution of the Amino Groups in Gramine and its Analogues with Trialkyl Phosphites, *ChemistrySelect*, 2019, **4**, 14111-14113.
16. J. C. Amicangelo and W. R. Leenstra, Structural Variability of Pendant Groups within the Interlayer Region of Zirconium Arene-Phosph(on)ates: Chemical and Structural Characterization of Oxy- and Methyl-Linked 2-Naphthyl Phosphonates, and Mixed Oxy-Linked

Derivatives, *Dalton Trans*, 2020, **49**, 3796-3808.

17. L. Capaldo, S. Bonciolini, A. Pulcinella, M. Nuno and T. Noel, Modular Allylation of C(sp<sup>3</sup>)-H Bonds by Combining Decatungstate Photocatalysis and HWE Olefination in Flow, *Chem. Sci.*, 2022, **13**, 7325-7331.
